# Supplementary material for: A pan-cancer analysis of the core pre-mRNA 3′ end processing factors, and their association with prognosis, tumor microenvironment, and potential targets
Source: Research Square preprint supplement (doi:10.21203/rs.3.rs-3421663/v1), 2023-10-12
Supplement: Supplementary file 1 [file 0e5002c602a1ddf7dcaa0fcc.xlsx]

## Sheet: CPSF2-TMB
CancerType	cor	pValue	sig
ACC	0.263933	0.0187565	*
BLCA	0.029724	0.549383
BRCA	-0.0687188	0.0319989	*
CESC	-0.0480347	0.418371
CHOL	-0.161793	0.345819
COAD	0.162483	0.00117557	**
DLBC	-0.235657	0.159863
ESCA	-0.0531982	0.504065
GBM	0.0951091	0.250205
HNSC	0.080126	0.0757961
KICH	0.0688011	0.586046
KIRC	-0.146829	0.00736667	**
KIRP	-0.0837719	0.163646
LAML	0.227131	0.0734263
LGG	-0.0229134	0.608891
LIHC	-0.0802299	0.129195
LUAD	0.171193	0.000114116	***
LUSC	0.16203	0.000325706	***
MESO	0.153649	0.176394
OV	0.0828989	0.172802
PAAD	0.0466997	0.569086
PCPG	0.0558113	0.460614
PRAD	0.0653541	0.151966
READ	0.186597	0.0321692	*
SARC	0.162043	0.0128722	*
SKCM	0.116729	0.0117702	*
STAD	0.222515	1.64592e-05	***
TGCT	-0.00702847	0.933134
THCA	-0.00468056	0.918365
THYM	-0.310118	0.000667177	***
UCEC	0.194019	7.55055e-06	***
UCS	0.309791	0.0201545	*
UVM	-0.163448	0.147427

## Sheet: CPSF3-TMB
CancerType	cor	pValue	sig
ACC	0.256884	0.0222933	*
BLCA	0.3029	4.1881e-10	***
BRCA	0.1577	7.56291e-07	***
CESC	-0.00510233	0.931537
CHOL	0.0915883	0.595242
COAD	-0.0666546	0.185606
DLBC	0.144381	0.392468
ESCA	-0.115684	0.145192
GBM	0.0116526	0.888215
HNSC	0.137894	0.00217296	**
KICH	-0.5	1

## Sheet: CSTF2-TMB
CancerType	cor	pValue	sig
ACC	-0.023632	0.836224
BLCA	0.205435	2.89547e-05	***
BRCA	0.0993826	0.00190063	**
CESC	-0.0844838	0.154145
CHOL	-0.133582	0.437336
COAD	0.141705	0.00472441	**
DLBC	0.208393	0.215005
ESCA	0.0646029	0.417015
GBM	0.0850857	0.303855
HNSC	0.0587835	0.193022
KICH	0.145762	0.246632
KIRC	-0.0148098	0.78805
KIRP	-0.119156	0.0471605	*
LAML	0.0369659	0.77363
LGG	0.210107	2.09387e-06	***
LIHC	0.128272	0.015016	*
LUAD	0.201195	5.42368e-06	***
LUSC	0.0574349	0.205309
MESO	0.0443938	0.697658
OV	0.0569433	0.349496
PAAD	0.260749	0.00122223	**
PCPG	-0.0395894	0.600851
PRAD	0.142718	0.00168228	**
READ	0.154872	0.0762065
SARC	0.252047	9.36606e-05	***
SKCM	0.258721	1.50779e-08	***
STAD	0.3439	1.1797e-11	***
TGCT	0.0666749	0.425561
THCA	-0.137084	0.00256094	**
THYM	-0.209008	0.023726	*
UCEC	0.19229	9.12692e-06	***
UCS	0.214392	0.112583
UVM	-0.205847	0.0669747

## Sheet: SYMPK-TMB
CancerType	cor	pValue	sig
ACC	0.509518	1.62142e-06	***
BLCA	0.0723315	0.144716
BRCA	0.0247477	0.440424
CESC	0.0241738	0.683945
CHOL	-0.0895273	0.603586
COAD	0.00671845	0.893976
DLBC	0.288051	0.0840671
ESCA	0.0847899	0.286411
GBM	0.121658	0.140762
HNSC	0.067517	0.134785
KICH	0.107697	0.393148
KIRC	0.0021813	0.968416
KIRP	0.0548857	0.361931
LAML	-0.0720329	0.574781
LGG	0.12919	0.00377257	**
LIHC	0.10484	0.0471476	*
LUAD	0.165825	0.000187188	***
LUSC	0.0369559	0.41532
MESO	0.319779	0.0040685	**
OV	0.145412	0.0163988	*
PAAD	0.156462	0.0550478
PCPG	0.0717859	0.342362
PRAD	-0.0464379	0.308952
READ	0.00162293	0.985265
SARC	0.0533906	0.415256
SKCM	0.0690522	0.137068
STAD	0.0101112	0.846714
TGCT	0.00413787	0.960604
THCA	0.0234452	0.607629
THYM	-0.360867	6.41489e-05	***
UCEC	0.105676	0.0154204	*
UCS	0.101041	0.458712
UVM	0.137745	0.22305
