# Supplementary material for: A pan-cancer analysis of the core pre-mRNA 3′ end processing factors, and their association with prognosis, tumor microenvironment, and potential targets
Source: Research Square preprint supplement (doi:10.21203/rs.3.rs-3421663/v1), 2023-10-12
Supplement: Supplementary file 2 [file 17ef16f1557832e70c678440.xlsx]

## Sheet: drugCor
Gene	Drug	cor	pvalue
NUDT21	Pyrazoloacridine	0.540559	8.25601e-06
FIP1L1	Chelerythrine	0.489899	7.10027e-05
CSTF2T	Nelarabine	0.488961	7.36587e-05
NUDT21	Amonafide	0.480003	0.000104038
CPSF6	Chelerythrine	0.47597	0.000121161
CPSF1	Fludarabine	0.471684	0.000142166
NUDT21	Chelerythrine	0.46392	0.000188907
CPSF1	Cladribine	0.460158	0.000216278
CPSF3	Chelerythrine	0.431747	0.000572267
PCF11	Nelarabine	0.424101	0.000733129
RBBP6	Chelerythrine	0.422763	0.000765176
NUDT21	okadaic acid	-0.420876	0.000812478
CPSF6	Nelarabine	0.416654	0.00092807
RBBP6	PX-316	0.406284	0.00127735
PCF11	Chelerythrine	0.405797	0.00129637
PCF11	PX-316	0.403646	0.0013833
CSTF3	Ifosfamide	0.402705	0.00142293
NUDT21	Fludarabine	0.402542	0.00142991
NUDT21	Nelarabine	0.401093	0.00149323
CPSF2	Chelerythrine	0.394231	0.00182861
NUDT21	Hydrastinine HCl	-0.391644	0.00197156
WDR33	Chelerythrine	0.385603	0.00234507
PCF11	Vorinostat	0.382953	0.00252794
RBBP6	Nelarabine	0.380276	0.00272546
NUDT21	8-Chloro-adenosine	0.374735	0.00317842
NUDT21	RH1	0.372237	0.00340362
CSTF3	Chelerythrine	0.369184	0.00369802
CLP1	Curcumin	0.366384	0.00398758
FIP1L1	Nelarabine	0.365566	0.00407581
CPSF1	5-fluoro deoxy uridine 10mer	0.364432	0.00420109
SYMPK	5-fluoro deoxy uridine 10mer	0.364195	0.00422768
CPSF4	Nelarabine	0.364168	0.00423076
RBBP6	Amonafide	0.363765	0.00427638
CPSF3	PX-316	0.363256	0.00433459
CSTF2T	Chelerythrine	0.362193	0.00445836
CPSF4	Raltitrexed	0.362008	0.00448031
CSTF2T	Fludarabine	0.359813	0.00474708
FIP1L1	Amonafide	0.359283	0.00481357
NUDT21	Cladribine	0.358889	0.00486349
RBBP6	Palbociclib	0.357441	0.00505113
WDR33	Nelarabine	0.356093	0.00523135
WDR33	PX-316	0.355407	0.00532522
CSTF1	Chelerythrine	0.355044	0.00537555
FIP1L1	Everolimus	-0.354844	0.00540346
CSTF2	Curcumin	0.353166	0.0056424
CLP1	Vorinostat	0.352892	0.00568227
FIP1L1	Ifosfamide	0.352477	0.00574324
CSTF2T	Cladribine	0.350963	0.00597029
CPSF3	Vorinostat	0.350209	0.00608629
CPSF1	Bortezomib	-0.349779	0.00615324
FIP1L1	PX-316	0.349418	0.00620999
CLP1	Allopurinol	0.349082	0.00626322
NUDT21	Asparaginase	0.347661	0.00649295
NUDT21	LMP776	0.346205	0.00673577
CPSF3	Nelarabine	0.34565	0.00683048
CPSF1	Depsipeptide	-0.345114	0.00692307
CPSF6	Amonafide	0.343662	0.00717916
NUDT21	Batracylin	0.342142	0.00745627
FIP1L1	Vorinostat	0.341327	0.0076087
CPSF2	Nelarabine	0.340213	0.00782119
NUDT21	Ifosfamide	0.339962	0.00786991
NUDT21	Palbociclib	0.339598	0.0079408
CSTF2T	Fenretinide	0.339124	0.00803406
CSTF1	PX-316	0.338123	0.00823413
CPSF6	Ifosfamide	0.337955	0.00826815
WDR33	Vorinostat	0.33767	0.00832615
CSTF2T	Calusterone	0.336999	0.00846405
CLP1	Cladribine	0.336791	0.00850713
RBBP6	Ifosfamide	0.334714	0.00894859
CLP1	Fludarabine	0.334666	0.00895909
NUDT21	Methotrexate	0.334585	0.00897665
CPSF4	Cytarabine	0.333876	0.00913228
NUDT21	LY-294002	-0.332942	0.00934075
NUDT21	Hydroxyurea	0.332117	0.00952837
CPSF1	Carfilzomib	-0.332093	0.00953394
PAPOLA	Chelerythrine	0.33209	0.00953464
CPSF6	Pyrazoloacridine	0.331494	0.00967229
CSTF1	Nelarabine	0.331487	0.00967385
CSTF3	Pyrazoloacridine	0.329703	0.0100963
RBBP6	Hydroxyurea	0.329498	0.0101458
CPSF4	Hydroxyurea	0.328208	0.0104625
CSTF2	6-Mercaptopurine	0.327273	0.0106974
PAPOLA	Olaparib	-0.326134	0.0109895
CPSF1	Clofarabine	0.326117	0.0109941
NUDT21	Vemurafenib	-0.326026	0.0110176
CPSF4	Chlorambucil	0.325225	0.0112277
NUDT21	Dexamethasone Decadron	0.325141	0.0112501
SYMPK	Celecoxib	-0.323861	0.0115936
CPSF3	Hydroxyurea	0.322451	0.0119825
CSTF2	Allopurinol	0.32226	0.0120358
NUDT21	AT-13387	0.321301	0.0123077
RBBP6	8-Chloro-adenosine	0.321091	0.012368
CSTF3	Amonafide	0.321033	0.0123849
NUDT21	Allopurinol	0.32073	0.0124722
CPSF6	Allopurinol	0.319112	0.0129483
PCF11	okadaic acid	-0.318511	0.0131292
PCF11	Belinostat	0.317083	0.0135678
CPSF6	Vorinostat	0.316762	0.0136681
CPSF3	Dimethylaminoparthenolide	0.316741	0.0136745
NUDT21	Clofarabine	0.316509	0.0137473
CSTF1	Dasatinib	-0.315548	0.0140529
CPSF4	Triethylenemelamine	0.315046	0.0142147
CSTF2	Vismodegib	0.314979	0.0142365
NUDT21	Cytarabine	0.314135	0.0145128
CLP1	Chelerythrine	0.314066	0.0145354
RBBP6	Dimethylaminoparthenolide	0.312967	0.0149024
CPSF1	Nelarabine	0.311033	0.0155675
CPSF3	Everolimus	-0.310793	0.015652
CLP1	6-Mercaptopurine	0.310622	0.015712
WDR33	3-Bromopyruvate (acid)	0.310297	0.0158271
FIP1L1	Olaparib	-0.30999	0.0159366
CPSF3	Parthenolide	0.309925	0.01596
CLP1	Dimethylaminoparthenolide	0.309902	0.0159682
CLP1	Cordycepin	0.309645	0.0160603
CSTF2T	Dexamethasone Decadron	0.309451	0.0161303
CSTF3	PX-316	0.306792	0.0171154
CLP1	Fenretinide	0.304307	0.0180822
CSTF3	Zoledronate	-0.303447	0.0184276
CPSF4	Uracil mustard	0.302818	0.0186836
CSTF2	Acrichine	0.302495	0.0188162
WDR33	Olaparib	-0.300492	0.0196568
CSTF1	Everolimus	-0.300425	0.0196857
CSTF3	Everolimus	-0.299992	0.0198717
CPSF6	PX-316	0.299607	0.0200382
CPSF4	Thiotepa	0.299576	0.0200519
CPSF6	okadaic acid	-0.298861	0.020365
CSTF1	Vorinostat	0.298672	0.0204482
CPSF1	Actinomycin D	-0.296547	0.0214062
CSTF2T	Staurosporine	-0.29633	0.0215062
PCF11	Lapatinib	0.29629	0.0215249
RBBP6	Pyrazoloacridine	0.295025	0.0221159
CSTF3	3-Bromopyruvate (acid)	0.294272	0.0224741
CLP1	Belinostat	0.294197	0.02251
CLP1	Benzimate	0.294096	0.0225583
CPSF1	Gemcitabine	0.293836	0.0226835
CLP1	Irofulven	-0.293488	0.022852
CPSF6	3-Bromopyruvate (acid)	0.293319	0.0229346
CPSF1	Vorinostat	0.293279	0.0229541
CPSF3	Acetalax	-0.29321	0.0229877
CSTF2	Elliptinium Acetate	-0.292921	0.0231291
CPSF3	Cyclophosphamide	0.292813	0.0231823
SYMPK	Gemcitabine	0.292468	0.0233525
CLP1	Lapachone	0.292308	0.0234314
NUDT21	PX-316	0.292238	0.0234662
SYMPK	Temsirolimus	0.291825	0.023672
CSTF2T	7-Ethyl-10-hydroxycamptothecin	0.290888	0.0241453
CPSF4	LMP-400	0.289458	0.0248823
SYMPK	Bleomycin	0.289295	0.0249676
CPSF3	Trametinib	0.288566	0.0253517
CPSF1	Mithramycin	-0.288279	0.0255044
CSTF2T	Cordycepin	0.287336	0.026011
CPSF4	XK-469	0.287231	0.0260682
NUDT21	Mithramycin	-0.287121	0.0261277
RBBP6	Chlorambucil	0.286488	0.0264738
NUDT21	Depsipeptide	-0.286248	0.0266061
CPSF4	Fenretinide	0.285305	0.0271316
CPSF6	Zoledronate	-0.284991	0.0273081
CSTF3	Lomustine	0.284739	0.027451
NUDT21	Vorinostat	0.284505	0.0275837
CSTF2T	PX-316	0.283881	0.027941
CPSF3	3-Bromopyruvate (acid)	0.283273	0.0282926
CPSF4	Cisplatin	0.283054	0.0284201
CSTF1	Hypothemycin	0.282557	0.0287115
CLP1	Fluphenazine	0.282065	0.0290026
CPSF3	Fostamatinib	0.281315	0.0294506
PCF11	Pyrazoloacridine	0.28109	0.0295864
NUDT21	Homoharringtonine	-0.280398	0.0300065
SYMPK	Floxuridine	0.27957	0.0305161
RBBP6	Batracylin	0.279425	0.0306065
CPSF2	AP-26113	-0.279337	0.030661
CPSF6	Fenretinide	0.27796	0.0315275
CPSF4	Pipobroman	0.277701	0.0316929
CPSF6	8-Chloro-adenosine	0.276703	0.0323367
CSTF2	Pipamperone	0.276538	0.0324438
PCF11	Ifosfamide	0.275781	0.0329408
CSTF2	Ethinyl estradiol	0.27578	0.0329415
CPSF3	Cobimetinib (isomer 1)	0.275441	0.033166
CPSF3	Fenretinide	0.274344	0.0339015
NUDT21	Pralatrexate	0.27409	0.0340739
NUDT21	3-Bromopyruvate (acid)	0.273644	0.0343776
CLP1	Nelarabine	0.27356	0.0344351
RBBP6	Lomustine	0.273546	0.0344446
CSTF3	Oxaliplatin	0.273308	0.0346084
CLP1	Parthenolide	0.273227	0.0346641
CSTF2T	Acrichine	0.272381	0.0352511
NUDT21	Fostamatinib	0.27196	0.0355468
PAPOLA	Vemurafenib	-0.271413	0.0359334
SYMPK	Curcumin	0.270786	0.0363807
NUDT21	Belinostat	0.270465	0.0366112
WDR33	Amonafide	0.270442	0.0366282
NUDT21	Chlorambucil	0.269995	0.0369517
WDR33	Fenretinide	0.269991	0.0369549
NUDT21	6-Mercaptopurine	0.269567	0.0372643
CSTF3	Vemurafenib	-0.269537	0.0372862
CPSF1	Cytarabine	0.269497	0.0373149
NUDT21	Fenretinide	0.269196	0.0375364
CLP1	LMP776	0.26889	0.0377618
SYMPK	(+)-JQ1	0.26874	0.037873
CSTF1	Raloxifene	0.268728	0.0378823
CSTF3	Nelarabine	0.268664	0.0379295
WDR33	Zoledronate	-0.268547	0.0380167
CPSF4	kahalide f	-0.267503	0.0387996
CPSF2	Olaparib	-0.266679	0.0394279
CSTF2T	Zoledronate	-0.266543	0.0395317
CPSF3	Asparaginase	0.266414	0.0396312
CLP1	Lenvatinib	-0.266144	0.0398393
PCF11	Allopurinol	0.266138	0.0398444
RBBP6	Oxaliplatin	0.265954	0.0399869
CPSF4	Gemcitabine	0.265163	0.0406041
NUDT21	Pemetrexed	0.264926	0.040791
CSTF3	LMP776	0.264413	0.0411969
CPSF1	Triapine	0.264369	0.0412321
CPSF3	Palbociclib	0.264334	0.0412603
CSTF2T	Vorinostat	0.262917	0.042401
CPSF4	Cladribine	0.2628	0.0424962
FIP1L1	3-Bromopyruvate (acid)	0.262651	0.0426177
CPSF1	Doxorubicin	-0.26214	0.0430378
NUDT21	Dimethylaminoparthenolide	0.261618	0.0434691
SYMPK	Cladribine	0.261396	0.0436545
NUDT21	Olaparib	-0.261076	0.0439215
CSTF3	8-Chloro-adenosine	0.261016	0.0439717
CLP1	8-Chloro-adenosine	0.260832	0.0441265
PCF11	Mithramycin	-0.260641	0.0442878
CPSF4	Raloxifene	0.260107	0.0447402
CSTF1	Fulvestrant	0.259605	0.0451687
CPSF3	Olaparib	-0.259566	0.0452027
CLP1	(+)-JQ1	0.258824	0.0458432
CPSF3	Amonafide	0.258043	0.0465255
RBBP6	LY-294002	-0.257898	0.0466527
NUDT21	Uracil mustard	0.257281	0.0471987
RBBP6	Fenretinide	0.257118	0.0473435
CPSF3	Allopurinol	0.25695	0.0474937
WDR33	Asparaginase	0.256828	0.0476033
CSTF3	AT-13387	0.256799	0.0476293
CPSF6	AT-13387	0.256283	0.0480928
CPSF3	Cladribine	0.255723	0.0486004
FIP1L1	Hydroxyurea	0.255181	0.0490963
