# Supplementary material for: A pan-cancer analysis of the core pre-mRNA 3′ end processing factors, and their association with prognosis, tumor microenvironment, and potential targets
Source: Research Square preprint supplement (doi:10.21203/rs.3.rs-3421663/v1), 2023-10-12
Supplement: Supplementary file 3 [file 338e3f9b21adfbf7eed3b7b9.xlsx]

## Sheet: estimateCor.cor
CancerType	CPSF1	WDR33	FIP1L1	CPSF4	CPSF2	CPSF3	NUDT21	CPSF6	PCF11	CLP1	RBBP6	PAPOLA	SYMPK	CSTF2	CSTF3	CSTF2T	CSTF1
ACC	-0.255648	-0.120204	-0.226144	-0.156816	-0.25241	-0.0806232	-0.0744401	-0.308398	-0.402118	-0.0660175	-0.325852	-0.449927	-0.263802	-0.0623905	-0.250657	-0.142989	-0.241504
BLCA	-0.247397	-0.253934	-0.235164	-0.167037	-0.013148	-0.163122	-0.0796471	-0.331996	-0.310353	-0.0222209	-0.307255	-0.209865	-0.152281	-0.134769	-0.347365	0.00516705	-0.322159
BRCA	-0.233153	-0.140503	-0.181129	-0.294025	-0.0583344	-0.329335	-0.0896806	-0.276029	0.0205041	-0.08152	-0.138845	-0.113492	-0.181926	-0.301953	-0.380969	0.048235	-0.286434
CESC	-0.086882	-0.151485	-0.0213501	-0.115556	-0.129013	-0.20301	-0.0302847	-0.12875	-0.0783583	-0.12621	-0.111848	-0.167641	0.0217371	-0.082136	-0.203252	-0.040131	-0.156943
CHOL	-0.125354	0.179408	0.257143	0.0440154	0.193565	-0.0911197	0.0787645	-0.0514801	0.201287	0.324582	0.0267696	0.151866	-0.131789	0.151094	0.0339768	0.0967825	0.037323
COAD	-0.154674	-0.0768961	0.0081081	-0.237683	0.148722	-0.211955	0.0191647	-0.0888776	0.0366411	0.014749	0.00758543	0.0517212	-0.186132	-0.122624	-0.18371	0.0923898	-0.121773
DLBC	-0.329027	-0.145897	0.206253	-0.417282	0.128854	-0.326314	0.120821	0.0496092	-0.0155232	-0.0310465	0.0530829	0.0404907	-0.314915	0.0442901	0.0717542	0.123426	-0.170213
ESCA	-0.106914	-0.152011	-0.105037	-0.0952564	-0.123717	-0.294432	0.0578708	-0.135888	0.0176315	-0.235992	-0.0623164	-0.141451	-0.0759892	-0.313885	-0.0863849	-0.111052	-0.242349
GBM	-0.366811	-0.42109	-0.495885	-0.196339	-0.179307	-0.307204	-0.344197	-0.52581	-0.444529	0.0237471	-0.456661	-0.293218	-0.369094	-0.432061	-0.433304	-0.202297	-0.379179
HNSC	-0.0671917	-0.215728	-0.167136	-0.209391	-0.0174296	-0.265704	-0.109289	-0.199517	-0.0783944	-0.188996	-0.190299	-0.0557705	-0.0034799	-0.22692	-0.229942	0.10302	-0.228892
KICH	-0.091958	0.133523	0.100481	-0.14882	-0.0140297	0.134484	-0.164292	-0.119056	0.0155594	-0.000874126	-0.217832	-0.0873252	-0.248033	-0.00437063	-0.0866696	0.151399	-0.209747
KIRC	-0.127927	-0.0277709	0.112099	-0.147709	0.312525	0.0340158	0.099799	0.0328486	0.00477117	0.112484	-0.0251503	0.125583	-0.131107	0.0687084	-0.0729022	0.196758	-0.07767
KIRP	-0.301566	-0.122991	0.049658	-0.0409363	0.00672603	-0.106425	-0.138205	-0.140831	-0.22304	0.111928	-0.28746	-0.074653	-0.308797	0.0374384	-0.249785	-0.003496	-0.212417
LAML	-0.308299	-0.274904	-0.277246	-0.209575	0.174186	-0.203085	-0.148735	-0.413573	-0.0775113	0.00215406	-0.325061	-0.0229139	-0.135939	-0.215455	-0.305891	-0.201304	-0.237856
LGG	-0.269972	-0.274158	-0.245699	0.112909	0.076066	-0.141764	-0.333518	-0.464142	-0.206878	0.218154	-0.195933	0.0328162	-0.0425845	-0.228176	-0.236857	-0.373471	-0.102948
LIHC	-0.166555	-0.220355	0.029589	-0.300102	0.0951144	-0.26238	0.0175109	-0.0822963	-0.0776984	-0.0669932	-0.0229038	0.0640263	-0.215232	-0.146222	-0.188385	-0.089844	-0.199033
LUAD	-0.229285	-0.252257	-0.146172	-0.235644	-0.0151037	-0.258494	0.00472233	-0.213232	0.00653316	0.0111164	-0.113221	-0.143102	-0.191606	-0.200228	-0.240025	0.0271166	-0.290602
LUSC	-0.216216	-0.371117	-0.278712	-0.411805	-0.165413	-0.331586	-0.172391	-0.403878	-0.166917	-0.0894375	-0.300327	-0.21562	-0.0868688	-0.333697	-0.373537	-0.0174084	-0.290084
MESO	-0.0159536	-0.304005	0.0190858	-0.202642	-0.00176423	-0.222077	-0.0786169	-0.0112741	-0.186792	-0.24621	-0.184245	0.0711637	-0.0129912	0.0723713	-0.253059	-0.106731	-0.365404
OV	0.0281354	-0.24275	0.0103231	-0.274371	0.0480077	-0.232721	-0.0839564	-0.325141	-0.106118	-0.0940965	-0.222091	-0.021667	0.0411169	-0.135864	-0.294068	0.0439324	-0.235612
PAAD	-0.37944	-0.0571905	-0.00884429	-0.387228	0.133705	-0.210157	0.0664912	-0.153532	0.0375933	0.245011	0.145246	-0.0493261	-0.40164	-0.0842436	-0.180047	0.418458	-0.179395
PCPG	-0.120491	-0.0562903	-0.145348	-0.100276	-0.215502	-0.0797761	-0.250785	-0.283233	-0.432153	0.0370536	-0.168332	-0.189637	-0.214709	0.036006	-0.357305	-0.0975206	-0.230779
PRAD	-0.160622	-0.0748636	0.0985159	-0.214144	0.0391885	-0.170025	0.0970093	-0.141228	-0.120442	-0.176655	0.0220841	-0.0154754	-0.261448	-0.0413472	-0.23713	-0.0347278	-0.356495
READ	-0.129188	-0.179558	0.0402105	-0.156245	-0.0883234	-0.194103	-0.0220609	-0.168543	0.0161785	-0.0173715	-0.0787977	-0.0770481	-0.249742	-0.0110021	-0.223948	0.0202006	-0.078035
SARC	-0.363861	-0.316202	-0.201698	-0.16203	-0.290012	-0.416647	-0.375594	-0.285326	-0.357103	0.0201922	-0.445681	-0.21261	-0.213004	-0.447705	-0.421029	-0.0749308	-0.304314
SKCM	-0.0800286	-0.0335318	-0.227826	-0.178725	-0.0444211	-0.236554	-0.0134664	-0.208309	-0.0201336	-0.171416	-0.0962545	-0.0168112	-0.0368144	-0.102501	-0.0995768	-0.05735	-0.273202
STAD	-0.338885	-0.18913	-0.235116	-0.306424	-0.161546	-0.282218	-0.167234	-0.350978	0.0070966	-0.102076	-0.104696	-0.354399	-0.093934	-0.304984	-0.366958	0.331692	-0.302171
TGCT	-0.111192	-0.566822	-0.391156	-0.262382	-0.333799	-0.467111	-0.350505	-0.44666	-0.0611086	-0.454885	-0.338202	-0.409037	-0.50272	-0.552945	-0.32535	-0.204618	-0.413684
THCA	0.067967	-0.0469818	-0.0716559	-0.0136031	-0.135853	0.0211122	-0.0122083	-0.125453	-0.109153	0.057557	-0.126335	-0.134613	-0.0124104	0.0660419	0.0145535	-0.02582	-0.140119
THYM	-0.36128	-0.340685	-0.17333	-0.160241	-0.278073	-0.406481	-0.0164934	-0.0683948	-0.00979205	-0.187929	-0.0917889	-0.202948	-0.175701	-0.239453	-0.343014	-0.154878	-0.375402
UCEC	-0.109972	-0.201389	-0.202432	-0.18127	-0.128938	-0.196477	-0.0994215	-0.224211	-0.133899	-0.13879	-0.18523	-0.181551	-0.0497082	-0.219372	-0.225225	-0.12372	-0.250068
UCS	-0.07054	-0.406083	0.0847573	-0.228571	-0.0547505	-0.445523	-0.314764	-0.102597	-0.0952837	0.0819549	-0.0596036	-0.190499	-0.289952	0.0965824	-0.325017	0.0494874	-0.0921394
UVM	0.161486	0.00337553	-0.0843413	-0.0304266	0.00586029	-0.00991561	-0.21812	-0.166784	-0.153563	0.276981	-0.128387	-0.100938	-0.0682607	0.163221	-0.0982185	0.0318331	0.0116034

## Sheet: RNAss cor
CancerType	CPSF1	WDR33	FIP1L1	CPSF4	CPSF2	CPSF3	NUDT21	CPSF6	PCF11	CLP1	RBBP6	PAPOLA	SYMPK	CSTF2	CSTF3	CSTF2T	CSTF1
ACC	0.0867866	0.166125	0.161497	0.501486	0.365192	0.26299	0.261144	0.192908	0.134385	0.156565	0.112407	0.453584	0.274675	0.159549	0.187016	0.119716	0.379608
BLCA	0.206739	0.29958	0.363293	0.453715	0.25055	0.517484	0.238944	0.42574	0.0474656	0.353995	0.202659	0.264338	0.182833	0.435367	0.412908	0.0949505	0.393266
BRCA	0.182545	0.121819	0.263689	0.230242	0.242174	0.578967	0.284945	0.346797	-0.127241	0.276097	0.145544	0.219722	0.0347546	0.367221	0.521284	-0.0537259	0.403857
CESC	0.106101	0.164041	0.0525932	0.410147	0.0745482	0.284422	0.00524858	0.199941	-0.0713141	0.167267	0.0392006	0.104646	0.100009	0.213032	0.213873	-0.0126355	0.204199
CHOL	0.123552	0.0370656	-0.329472	0.45843	-0.0779923	0.380438	-0.0496782	-0.0442728	-0.255856	-0.183526	-0.10991	-0.133076	0.168597	0.00952381	0.232432	-0.153153	0.153925
COAD	0.0331503	0.164832	0.074297	0.321553	0.183313	0.468296	0.313485	0.285556	-0.0954576	0.181805	0.0121526	0.133417	-0.0145226	0.398075	0.386544	-0.00829802	0.241346
DLBC	0.362462	0.090317	0.138081	0.461355	0.0402736	0.503908	0.223838	0.271928	-0.0110725	0.17716	0.0457013	0.0417933	0.384824	0.163265	0.281264	-0.0543856	0.549718
ESCA	0.251069	0.204046	0.198324	0.299511	0.254037	0.52018	0.157005	0.32338	-0.0153141	0.456865	0.0425349	0.270207	0.222363	0.537173	0.268329	0.266545	0.405086
GBM	0.12583	0.265285	0.451277	0.0839517	0.105204	0.583438	0.288673	0.403947	0.188247	0.108297	0.216604	0.180691	0.0483961	0.405104	0.504281	0.26673	0.380829
HNSC	0.17882	0.373083	0.283938	0.415604	0.154248	0.525034	0.294578	0.436656	0.0802273	0.29635	0.213777	0.18354	0.20719	0.409189	0.446699	0.125337	0.39673
KICH	0.00695971	-0.0605311	0.0695513	0.0330128	0.153251	-0.00723443	0.146658	0.111767	0.0413919	0.208837	0.142628	0.116667	0.0239927	0.122894	0.10261	-0.0554487	0.197665
KIRC	-0.242499	-0.163296	-0.00974983	0.122846	0.0697368	0.442244	0.101761	-0.0830303	-0.229965	0.0671044	-0.181805	-0.0296013	-0.112678	0.112582	0.222854	-0.0599219	0.147332
KIRP	-0.26435	-0.260456	-0.138812	-0.132639	-0.0427654	0.308052	0.0744742	-0.282239	-0.323805	0.116957	-0.330124	-0.151546	-0.1362	0.239367	-0.217576	-0.112287	0.0451742
LAML	-0.0543812	0.312459	0.407853	0.00622343	0.483392	0.738864	0.679802	0.435372	0.0479255	0.255739	0.442021	0.342816	-0.00512911	0.481365	0.605684	0.322709	0.461191
LGG	0.101637	0.23794	0.280375	-0.182593	0.0395321	0.320874	0.487414	0.407584	0.12105	-0.0673137	0.0774082	0.0272637	-0.0621615	0.310633	0.265948	0.487054	0.274111
LIHC	0.142202	0.14876	-0.0293025	0.420407	-0.0708978	0.438471	-0.0429723	0.0975218	-0.156196	0.108026	-0.0937874	-0.069958	0.253442	0.259281	0.244752	0.0128744	0.276439
LUAD	0.0590164	0.104472	0.350669	0.440481	0.351935	0.607777	0.236767	0.297468	-0.112861	0.228032	0.0638196	0.300258	0.0652572	0.404178	0.478737	0.105704	0.417005
LUSC	0.0413307	0.261973	0.319039	0.446956	0.287518	0.56091	0.314224	0.435504	0.0010907	0.233183	0.142188	0.293778	-0.0233464	0.400032	0.475171	0.178341	0.375393
MESO	-0.0394453	0.308666	-0.0282372	0.390443	0.0948252	0.524676	-0.0110477	0.0169159	0.0617859	0.409972	-0.179716	0.0224633	0.273739	0.266947	0.339101	-0.0330299	0.47907
OV	-0.0776892	0.227969	0.0310854	0.282584	0.192803	0.320235	0.230958	0.278984	-0.0631753	0.340947	0.00134612	0.140913	-0.101074	0.377793	0.392721	-0.0122997	0.189502
PAAD	0.138215	0.0170758	0.213219	0.329627	0.0642822	0.491027	0.256313	0.145561	-0.164783	0.0768725	-0.13971	0.146532	0.2071	0.343352	0.196027	-0.223369	0.333562
PCPG	-0.0320653	0.101519	0.249921	0.117107	0.443616	0.394821	0.38746	0.198275	0.350338	0.117177	-0.0311277	0.19816	0.224977	0.122559	0.424063	0.294838	0.368281
PRAD	0.0498168	-0.057151	0.0698654	0.184308	0.239475	0.481624	-0.0151678	0.269915	0.117341	0.250157	0.0742831	0.268703	0.114876	0.221694	0.396388	0.0259622	0.323825
READ	0.0547423	0.225203	0.0182991	0.302195	0.206145	0.552139	0.276443	0.28602	-0.0667288	0.217942	0.0200819	0.0431604	0.229868	0.319673	0.463612	0.0811746	0.191987
SARC	0.18373	0.190143	0.204131	0.430424	0.285021	0.573072	0.188843	0.101713	0.0345122	0.296329	0.0652437	0.111354	0.236256	0.616805	0.382901	0.0366434	0.308754
SKCM	0.0758349	0.123526	0.227509	0.273203	0.203571	0.342255	-0.012362	0.241066	-0.0770711	0.294157	0.0199161	0.165818	0.0924586	0.354982	0.181381	0.192277	0.290957
STAD	0.376452	0.265168	0.410464	0.440133	0.33775	0.550319	0.386587	0.472747	0.0199873	0.369692	0.124485	0.459459	0.217834	0.576985	0.580644	-0.185231	0.440311
TGCT	0.0803745	0.546018	0.353717	0.388705	0.324015	0.475837	0.281022	0.478589	-0.0390835	0.434891	0.261448	0.325742	0.301756	0.656666	0.460978	0.138404	0.353227
THCA	-0.316801	-0.178922	-0.124516	0.144462	0.271203	0.135445	0.0194444	-0.151391	-0.16331	0.0318311	-0.21553	0.153186	0.0203092	-0.0718663	-0.255439	0.100607	0.14637
THYM	0.586847	0.582267	0.178714	0.34129	0.218295	0.871016	-0.312071	0.120759	-0.234931	0.284553	-0.149352	0.0997935	0.577382	0.154949	0.478279	0.0350449	0.250093
UCEC	0.0722502	0.404394	0.293158	0.467753	0.276223	0.531636	0.211839	0.345636	0.0590783	0.403188	0.198159	0.230201	0.109267	0.433712	0.394038	0.00610853	0.4546
UCS	0.0644566	0.135954	-0.0607656	0.303759	0.0372522	0.383527	0.311005	0.0982228	-0.09419	0.182843	-0.167806	0.137389	0.249761	0.246753	0.44566	-0.0402597	0.0734108
UVM	0.0726442	-0.102602	0.056587	0.304173	0.157759	0.192077	-0.0294655	0.0393812	0.0583919	0.0783872	0.0276606	0.0345757	-0.13338	0.0391936	0.149906	0.0821847	0.093835

## Sheet: RNAss pval
CancerType	CPSF1	WDR33	FIP1L1	CPSF4	CPSF2	CPSF3	NUDT21	CPSF6	PCF11	CLP1	RBBP6	PAPOLA	SYMPK	CSTF2	CSTF3	CSTF2T	CSTF1
ACC	0.44913	0.145824	0.157508	4.00414e-06	0.00108605	0.0202595	0.02118	0.0906271	0.240244	0.170712	0.326455	3.7064e-05	0.0151934	0.162628	0.101069	0.295824	0.00066365
BLCA	2.93017e-05	9.73316e-10	6.2937e-14	0	3.68133e-07	0	1.27482e-06	0	0.341136	3.1024e-13	4.22139e-05	7.77451e-08	0.00022528	0	0	0.0565608	0
BRCA	1.46157e-09	5.772e-05	1.29313e-18	1.87129e-14	7.27272e-16	0	1.12617e-21	0	2.64512e-05	2.40719e-20	1.50087e-06	2.83286e-13	0.252436	0	0	0.0767712	0
CESC	0.065138	0.00423535	0.361389	1.01823e-13	0.195519	5.36366e-07	0.927465	0.000474181	0.215657	0.00353495	0.496414	0.0689251	0.0822137	0.0001932	0.000182024	0.826518	0.000356185
CHOL	0.471343	0.829762	0.0502735	0.00534249	0.650093	0.0227335	0.772978	0.797188	0.13184	0.282806	0.521978	0.437612	0.324319	0.956397	0.172003	0.371095	0.368665
COAD	0.486804	0.000510663	0.118794	5.69656e-12	0.000109021	0	1.99901e-11	1.15472e-09	0.0449103	0.000124377	0.798816	0.00499016	0.760678	0	0	0.861839	3.06151e-07
DLBC	0.0117542	0.540392	0.348187	0.0010894	0.785268	0.0003137	0.125994	0.0618039	0.940516	0.227605	0.757127	0.777359	0.0072621	0.266618	0.0531326	0.71276	6.8617e-05
ESCA	0.00140555	0.00975645	0.012048	0.000127885	0.00122825	0	0.0474839	3.34454e-05	0.847428	1.89409e-09	0.592937	0.000573419	0.00479197	0	0.000627952	0.000684159	1.40319e-07
GBM	0.106187	0.000575362	1.56521e-09	0.281895	0.17717	0	0.000172337	8.89939e-08	0.0152588	0.16472	0.00514249	0.0199371	0.535411	8.1244e-08	0	0.000535635	5.13269e-07
HNSC	6.37495e-05	0	1.43993e-10	0	0.000574182	0	2.72522e-11	0	0.0742496	2.05167e-11	1.64231e-06	4.03645e-05	3.43641e-06	0	0	0.00521047	0
KICH	0.956488	0.633901	0.584132	0.795227	0.226066	0.954767	0.246853	0.378332	0.744814	0.097693	0.260184	0.35768	0.850445	0.332459	0.418815	0.662697	0.117314
KIRC	2.86015e-08	0.000204453	0.825415	0.00531431	0.114288	0	0.0210649	0.0599593	1.46673e-07	0.128639	3.48031e-05	0.502973	0.0106048	0.010672	3.56453e-07	0.174903	0.000816385
KIRP	6.81546e-06	9.36833e-06	0.0193314	0.0254614	0.472622	1.36156e-07	0.210701	1.48332e-06	2.83143e-08	0.0489894	1.47107e-08	0.0106041	0.0217477	4.82782e-05	0.000227357	0.0587995	0.448029
LAML	0.51548	0.000140249	4.5352e-07	0.940722	1.12276e-09	0	0	6.14399e-08	0.566609	0.00196181	3.69008e-08	2.72534e-05	0.951134	1.35692e-09	0	8.21567e-05	7.92395e-09
LGG	0.0201162	4.00322e-08	8.07242e-11	2.73987e-05	0.3668	7.35104e-14	0	0	0.00559899	0.124151	0.0769518	0.533738	0.155691	4.83022e-13	7.5234e-10	0	2.16166e-10
LIHC	0.00618209	0.00416625	0.574046	0	0.173484	0	0.409665	0.0609545	0.00261387	0.0378453	0.0715729	0.179266	8.54625e-07	4.68131e-07	1.89209e-06	0.804961	7.34661e-08
LUAD	0.183667	0.0184259	4.08989e-16	0	3.05477e-16	0	7.08098e-08	9.31524e-12	0.0108624	2.14791e-07	0.150458	5.85082e-12	0.141464	0	0	0.0170859	0
LUSC	0.363119	5.19438e-09	7.75365e-13	0	1.28326e-10	0	1.76512e-12	0	0.98086	2.17234e-07	0.00169053	4.88952e-11	0.607532	0	0	7.91193e-05	0
MESO	0.717917	0.00397417	0.795992	0.000225777	0.38443	3.35226e-07	0.919482	0.876954	0.571303	0.000101768	0.0977488	0.837069	0.01097	0.0131868	0.00148636	0.762308	4.08728e-06
OV	0.208171	0.000194186	0.614883	3.39427e-06	0.00167565	1.2278e-07	0.000159139	4.55468e-06	0.306271	1.62352e-08	0.982625	0.0220826	0.101261	3.03346e-10	5.12783e-11	0.842235	0.00201614
PAAD	0.0853115	0.832262	0.00762804	2.93508e-05	0.42489	9.65401e-11	0.00128029	0.0698552	0.039916	0.33979	0.0819612	0.0679958	0.00959174	1.29475e-05	0.0143029	0.0051488	2.32993e-05
PCPG	0.667119	0.172522	0.000691752	0.11534	5.27125e-10	4.56277e-08	8.38698e-08	0.00737702	1.46373e-06	0.115122	0.676295	0.00741201	0.00231169	0.099278	3.48632e-09	5.7544e-05	3.83475e-07
PRAD	0.269982	0.205622	0.121682	4.02436e-05	8.32529e-08	0	0.737083	1.35826e-09	0.00921659	2.08327e-08	0.0998013	1.3894e-09	0.010805	7.27732e-07	0	0.565502	2.40216e-13
READ	0.496889	0.00478747	0.820441	0.000135183	0.00993539	0	0.000499828	0.000311638	0.407451	0.00636616	0.803286	0.592281	0.00396845	5.19349e-05	1.65878e-09	0.31339	0.0164693
SARC	0.00309607	0.0021933	0.000996162	4.47539e-13	3.60773e-06	0	0.00235413	0.103065	0.580837	1.41323e-06	0.296276	0.0742001	0.000133257	0	2.70929e-10	0.557689	4.82237e-07
SKCM	0.100205	0.00730678	6.48515e-07	1.93173e-09	8.85193e-06	2.92557e-14	0.788943	1.29589e-07	0.094777	9.16554e-11	0.666266	0.000306762	0.0449328	2.39524e-15	7.73542e-05	2.7498e-05	1.48376e-10
STAD	1.63727e-13	3.39287e-07	0	0	5.46686e-11	0	2.68086e-14	0	0.70455	4.95788e-13	0.0178615	0	3.03871e-05	0	0	0.000404477	0
TGCT	0.319774	0	7.29239e-06	7.17069e-07	4.29954e-05	5.87842e-10	0.000417391	4.45788e-10	0.628857	2.20814e-08	0.00105309	3.89628e-05	0.000145482	0	2.38633e-09	0.0859022	7.51955e-06
THCA	4.11878e-13	5.41231e-05	0.00510225	0.00114401	6.80898e-10	0.00230381	0.662792	0.000650005	0.000232347	0.475267	1.07741e-06	0.000559287	0.648778	0.106711	6.55719e-09	0.0237953	0.000981447
THYM	0	0	0.0519248	0.000159048	0.0172377	0	0.000583247	0.190528	0.0102601	0.00177573	0.104938	0.27979	0	0.0924345	5.63219e-08	0.704767	0.00620727
UCEC	0.097543	0	8.34594e-12	0	1.32381e-10	0	9.79917e-07	3.68855e-16	0.175618	0	4.77575e-06	9.89683e-08	0.0121076	0	0	0.888703	0
UCS	0.636088	0.316819	0.655578	0.0232252	0.784683	0.00373991	0.0200193	0.470338	0.488826	0.176949	0.215758	0.311699	0.0636042	0.0669423	0.00065308	0.767755	0.58984
UVM	0.52117	0.364379	0.617414	0.00627151	0.161946	0.087864	0.794908	0.728219	0.606221	0.488696	0.807225	0.76032	0.237678	0.729463	0.184073	0.467829	0.406952

## Sheet: DNAss cor
CancerType	CPSF1	WDR33	FIP1L1	CPSF4	CPSF2	CPSF3	NUDT21	CPSF6	PCF11	CLP1	RBBP6	PAPOLA	SYMPK	CSTF2	CSTF3	CSTF2T	CSTF1
ACC	-0.000265557	0.0979653	0.0297045	0.187496	-0.0165531	0.25601	-0.0643281	-0.0657444	-0.162129	0.215746	-0.208715	-0.0748492	-0.31987	0.118224	-0.0338522	-0.168224	-0.0975607
BLCA	0.134204	-0.00164006	0.0944231	0.0148241	-0.0748901	0.0854324	0.0194018	0.0690767	0.122074	-0.12386	0.054621	-0.00433529	0.0325414	-0.00598409	0.122011	-0.144526	-0.0438453
BRCA	0.0958745	0.00561857	-0.0454637	0.0505407	-0.020287	0.0874566	0.0223381	-0.0265968	-0.0939659	0.112811	0.0205737	-0.0592754	0.000844468	0.0737049	0.0717247	-0.158626	0.0704571
CESC	-0.00699997	0.072289	-0.000250631	0.201029	0.146648	0.174088	0.172198	0.0965252	0.170305	0.100244	0.104583	0.0461898	-0.14177	0.194627	-0.0420309	0.0500239	0.0293397
CHOL	0.319176	0.266409	0.023166	0.125097	0.606178	0.147748	0.0736165	0.103475	0.0777349	0.281081	0.229858	0.410039	-0.239125	0.690347	0.284685	0.143372	0.141828
COAD	0.139691	0.038807	-0.106101	0.160835	-0.0994153	0.105598	0.00905968	0.0265939	-0.0525678	0.161588	-0.145077	-0.00914668	0.0404233	0.187319	0.0586515	-0.110799	0.0319925
DLBC	0.205818	0.176509	0.209075	0.221776	0.00998697	0.125163	0.307534	0.236974	0.165871	0.0798958	0.174338	0.000217108	0.299609	0.16967	0.266283	0.0238819	0.0791359
ESCA	0.0329046	0.0629234	0.0540841	0.0378706	0.0727939	0.182864	0.0683786	0.198655	-0.0943191	0.156548	0.0838919	0.0687419	0.00381753	0.157366	0.101916	0.0721493	0.0978671
GBM	0.149674	0.276354	0.31946	0.126776	-0.129176	0.298435	0.275538	0.383497	0.286578	-0.0861655	0.324309	-0.0545795	0.16057	0.41297	0.390649	0.155002	0.256144
HNSC	0.0518152	0.190841	0.0883266	0.176134	0.0991649	0.218785	0.156118	0.122134	0.0655281	0.0781196	0.124165	0.105708	0.0117488	0.164691	0.0926448	-0.0762711	0.167865
KICH	0.110348	-0.387088	-0.0568681	-0.111493	-0.078663	-0.325824	-0.0292125	0.0430861	-0.144322	-0.0513736	-0.0722985	0.0271978	0.0516484	-0.0322344	-0.119048	-0.196749	0.12619
KIRC	0.0351619	0.0469561	0.13577	-0.178674	0.0883283	-0.0820123	0.00958008	-0.0102184	0.0616633	-0.0227917	-0.0326402	0.0560962	0.00463884	0.0423799	-0.00501265	-0.0099866	-0.0750764
KIRP	0.0692322	0.172837	0.0307625	0.122195	-0.0684756	0.0198037	-0.0983891	-0.0178948	0.305141	0.0764885	0.0435351	0.0634744	0.0711642	-0.0608632	0.257513	-0.0702808	-0.0168882
LAML	-0.117722	-0.146589	-0.09115	-0.14041	0.155773	0.0687133	-0.00896582	-0.188142	-0.00824397	0.0166545	-0.0776421	-0.0314766	-0.082832	0.197374	0.0349045	-0.097706	0.0128824
LGG	-0.0369909	-0.160689	-0.224061	0.292082	-0.321027	-0.0844977	-0.256683	-0.246775	-0.177511	0.148298	-0.230214	-0.122059	-0.0254367	-0.164802	-0.0217753	-0.437428	-0.0716586
LIHC	-0.12989	-0.0330585	-0.12667	0.0342643	-0.0215689	0.0856863	0.107616	-0.134836	-0.0803355	0.0665482	0.0161136	-0.127784	-0.00261558	0.186929	-0.0181117	0.108063	0.0531539
LUAD	0.0637813	0.00411587	0.196543	0.172469	0.216192	0.243574	0.133934	0.142354	0.0287296	0.151085	0.1459	0.289207	0.0741628	0.18776	0.250569	0.0126461	0.160826
LUSC	0.200808	0.248813	0.188889	0.233932	0.162238	0.142489	0.102298	0.18409	-0.0279141	0.208148	0.0555845	0.119536	0.00593329	0.2988	0.198186	-0.000991976	0.148792
MESO	0.11043	-0.281759	0.0161611	-0.0241615	-0.0358602	-0.0652389	0.0539554	-0.128072	-0.0373508	-0.0543328	0.00770791	-0.0765036	-0.0548799	0.230322	-0.138035	-0.166206	-0.213284
OV	0.357143	0.285714	-0.214286	0.178571	0.25	0.178571	0.107143	-0.75	-0.25	0.821429	0.0714286	0.607143	0	0.5	0.321429	-0.142857	-0.107143
PAAD	0.177879	-0.133176	0.028547	0.193359	-0.132181	0.175714	0.000417253	-0.164303	-0.213235	-0.0201893	-0.175354	-0.100153	0.0600085	0.191475	-0.0618261	-0.248828	0.0509744
PCPG	-0.0576264	-0.0986642	0.0379515	-0.128939	0.115258	0.0653279	0.334441	0.0894518	0.31383	-0.166573	-0.127888	-0.137222	-0.261036	-0.0850128	0.255327	0.0130333	-0.0151792
PRAD	0.172802	0.0339695	0.0103513	0.114215	-0.0654856	0.0407673	-0.0910805	-0.0429183	0.072258	-0.00330634	0.0245381	-0.0853573	0.0481173	0.132491	0.0657546	-0.092653	-0.144591
READ	0.0365784	0.1647	-0.20708	0.105285	-0.094838	0.108131	0.0138208	0.114258	-0.0169274	0.125384	0.112206	-0.00135101	-0.0306686	0.156406	0.10988	-0.0268251	-0.164643
SARC	0.175235	-0.00203724	0.216196	0.136595	0.0326947	0.131715	0.105768	-0.025162	-0.197769	0.0720195	-0.110041	0.0888527	0.0253318	0.168865	0.104212	0.00351232	0.159532
SKCM	0.00761334	0.0430658	0.0809344	0.0977369	0.119318	0.157306	0.0845205	0.0199913	-0.14781	0.0788054	-0.0825321	-0.00903308	-0.00172914	0.27847	0.152907	-0.104174	0.0339919
STAD	0.257488	0.0748407	0.100592	0.0588581	0.150033	0.222666	-0.0664252	0.100025	-0.158688	0.102598	-0.027481	0.221001	0.0262646	0.21744	0.174843	-0.184269	0.125455
TGCT	-0.145612	0.731204	0.505092	-0.0262544	0.345612	0.232242	0.285753	0.228739	0.0932261	0.547891	0.336283	0.452264	0.713167	0.551945	0.0600915	0.192066	0.377448
THCA	0.232362	0.0123835	-0.0314282	0.0317927	-0.097142	0.0830155	0.118338	0.0176322	-0.0936699	-0.013095	-0.0196694	-0.17229	0.120457	0.139661	0.0930493	-0.0148917	-0.151254
THYM	-0.647215	-0.748711	-0.361216	-0.15428	-0.319947	-0.708318	-0.0785358	-0.234796	-0.0827446	-0.244552	-0.102414	-0.227938	-0.40574	-0.206331	-0.440308	-0.254351	-0.172596
UCEC	0.0900049	-0.0625666	0.0246273	0.0331224	0.0251547	0.000833772	0.0465411	0.0571606	0.0501414	0.0442936	0.0463962	0.0252427	-0.0772578	0.0534113	0.126578	-0.0155481	-0.0454786
UCS	0.0455913	0.075188	0.0140807	-0.05311	0.260629	0.00608339	-0.0511278	-0.0596719	-0.0945318	0.0274778	-0.0796992	0.231511	-0.0688312	0.329528	0.167327	-0.0727956	-0.0525632
UVM	0.443483	0.0288561	0.134294	0.265917	0.210595	0.129442	-0.067534	0.0425223	-0.0389123	0.46444	0.0178153	0.0213549	-0.262635	0.185279	0.128645	0.0407173	0.201078

## Sheet: DNAss pval
CancerType	CPSF1	WDR33	FIP1L1	CPSF4	CPSF2	CPSF3	NUDT21	CPSF6	PCF11	CLP1	RBBP6	PAPOLA	SYMPK	CSTF2	CSTF3	CSTF2T	CSTF1
ACC	0.998242	0.392715	0.795901	0.100184	0.885443	0.0239306	0.575058	0.566656	0.155872	0.0579739	0.0667978	0.514074	0.00447053	0.301918	0.768144	0.140746	0.39468
BLCA	0.00694237	0.973774	0.0579517	0.766328	0.13287	0.0863461	0.697303	0.165748	0.0141228	0.0127656	0.273265	0.930746	0.514098	0.904516	0.0141726	0.00362767	0.379259
BRCA	0.0074302	0.875558	0.204915	0.158728	0.571742	0.0146401	0.533501	0.458445	0.00870445	0.0016219	0.566319	0.098282	0.981222	0.0397399	0.0453835	8.8843e-06	0.0493391
CESC	0.903363	0.209436	0.996534	0.000440981	0.0106446	0.00238741	0.00266548	0.0934978	0.0029731	0.0814923	0.0690941	0.422843	0.0135675	0.000672252	0.46583	0.385345	0.610761
CHOL	0.0582483	0.116232	0.893341	0.465781	0.000122624	0.388377	0.668588	0.546767	0.651176	0.0969167	0.176904	0.0135961	0.159721	6.09685e-06	0.0925751	0.402708	0.407838
COAD	0.0175593	0.510887	0.0717227	0.00618884	0.0916111	0.0730839	0.87805	0.652367	0.373036	0.0059496	0.013622	0.876888	0.493435	0.00140252	0.320212	0.059974	0.587848
DLBC	0.160092	0.22934	0.153473	0.129591	0.946368	0.395455	0.0339081	0.10484	0.258981	0.588262	0.235189	0.99912	0.0389739	0.248112	0.0675783	0.87179	0.591826
ESCA	0.679248	0.42885	0.496577	0.634126	0.359928	0.0207592	0.38986	0.0119035	0.235214	0.0481396	0.291228	0.387342	0.961759	0.0469721	0.199488	0.364206	0.218006
GBM	0.241018	0.0286669	0.010999	0.321268	0.312134	0.0178363	0.0291556	0.00205637	0.0231077	0.500967	0.00979444	0.670216	0.208163	0.000849166	0.00167064	0.224531	0.0430082
HNSC	0.249291	1.94601e-05	0.0493221	8.22725e-05	0.0272533	9.22575e-07	0.000490903	0.00649029	0.145002	0.0821992	0.00564953	0.0185647	0.794016	0.000234092	0.0391877	0.0897258	0.000176319
KICH	0.384447	0.00169973	0.654603	0.37951	0.535753	0.00887407	0.818386	0.734743	0.254521	0.686147	0.569337	0.830727	0.684556	0.799957	0.3479	0.119048	0.319575
KIRC	0.536515	0.409049	0.0166434	0.00158073	0.120036	0.148975	0.866297	0.857481	0.278153	0.688724	0.56614	0.323916	0.935027	0.45624	0.929804	0.86068	0.186556
KIRP	0.256748	0.00444107	0.614572	0.0448993	0.261992	0.745836	0.106692	0.769609	3.6316e-07	0.210122	0.47599	0.298507	0.243687	0.318857	1.95772e-05	0.2496	0.782233
LAML	0.154016	0.0754619	0.270218	0.088729	0.0587531	0.406205	0.913788	0.0221533	0.920706	0.840597	0.347856	0.703796	0.316505	0.0163206	0.673297	0.23715	0.876375
LGG	0.398425	0.000228208	2.41994e-07	1.19819e-11	7.14224e-14	0.0534758	2.94992e-09	1.20159e-08	4.58372e-05	0.000676805	1.10488e-07	0.00521222	0.561512	0.000156291	0.619184	0	0.101627
LIHC	0.0124444	0.525963	0.0148117	0.510973	0.67908	0.099819	0.0385833	0.00945589	0.122904	0.201445	0.75727	0.0139514	0.959992	0.000306801	0.728414	0.0377803	0.307719
LUAD	0.175308	0.930359	2.61573e-05	0.000230378	3.6153e-06	1.67473e-07	0.00432194	0.00240989	0.54178	0.00127238	0.00186697	4.27536e-10	0.114938	5.96948e-05	7.19389e-08	0.788294	0.000599354
LUSC	0.00012081	1.7174e-06	0.000302703	7.07296e-06	0.0019513	0.00658142	0.0515165	0.000431614	0.595876	6.68078e-05	0.290731	0.0227891	0.910261	7.57403e-09	0.000148538	0.984968	0.00453234
MESO	0.310811	0.00877894	0.882407	0.824936	0.742619	0.549955	0.621103	0.239435	0.732314	0.618661	0.943795	0.483129	0.615127	0.0331039	0.204597	0.126018	0.0488109
OV	0.444444	0.555952	0.661508	0.713095	0.594841	0.713095	0.839683	0.0662698	0.594841	0.034127	0.906349	0.166667	1	0.266667	0.497619	0.78254	0.839683
PAAD	0.0264293	0.0974181	0.723238	0.0157035	0.0999646	0.0283438	0.995886	0.0405049	0.00762347	0.802255	0.0286736	0.213258	0.456369	0.0167634	0.442825	0.00178452	0.527007
PCPG	0.439337	0.184958	0.610681	0.0827931	0.121226	0.380583	4.49883e-06	0.22957	1.76989e-05	0.0247139	0.0853461	0.0647583	0.000388467	0.253588	0.000524084	0.861248	0.838692
PRAD	0.000119754	0.452049	0.818787	0.0112702	0.146903	0.366751	0.0434819	0.341994	0.109408	0.941665	0.587022	0.058497	0.286678	0.00325828	0.145247	0.0399735	0.00131334
READ	0.725886	0.112585	0.045381	0.311946	0.362586	0.298988	0.894668	0.272318	0.871165	0.228105	0.281064	0.989724	0.768815	0.132067	0.291207	0.797125	0.112713
SARC	0.00480856	0.974008	0.000483643	0.0283275	0.600924	0.0345273	0.0899932	0.687297	0.00143553	0.248858	0.0776936	0.154625	0.685299	0.00660897	0.0948433	0.955201	0.0103384
SKCM	0.869059	0.350904	0.0793154	0.0339917	0.00957984	0.000620709	0.066858	0.665082	0.00130907	0.0875615	0.0735506	0.844926	0.970134	9.19006e-10	0.000881636	0.0237986	0.461613
STAD	1.87621e-06	0.171021	0.0655421	0.28186	0.00590112	3.99263e-05	0.224471	0.0670829	0.00357324	0.0603232	0.615529	4.5701e-05	0.631254	6.08075e-05	0.00131107	0.000701386	0.0214943
TGCT	0.0706705	0	1.24239e-11	0.745466	1.20394e-05	0.00371305	0.000330403	0.00427828	0.248294	0	2.10977e-05	5.15296e-09	0	0	0.457214	0.0167779	1.55546e-06
THCA	1.3962e-07	0.781241	0.480876	0.4758	0.0290886	0.0623179	0.00779581	0.692536	0.0353769	0.769019	0.659134	0.000102051	0.00675489	0.0016691	0.036615	0.738415	0.000657513
THYM	0	0	6.09679e-05	0.0938643	0.000415921	0	0.395356	0.0103049	0.370461	0.00748346	0.267306	0.0128132	5.69928e-06	0.0245245	7.16564e-07	0.00536218	0.0605953
UCEC	0.0666772	0.202744	0.616327	0.500333	0.608794	0.986468	0.343538	0.244598	0.307473	0.367363	0.345043	0.607541	0.115607	0.276965	0.00979608	0.751762	0.354676
UCS	0.738016	0.580845	0.917889	0.696729	0.0526459	0.964588	0.707535	0.661398	0.487244	0.840353	0.558297	0.0860894	0.613305	0.0134879	0.217084	0.592968	0.699704
UVM	4.55445e-05	0.799062	0.234455	0.0173671	0.060921	0.251912	0.550957	0.707482	0.731331	1.79282e-05	0.87516	0.850604	0.018841	0.0998577	0.254863	0.719373	0.0737761
