# Supplementary material for: A pan-cancer analysis of the core pre-mRNA 3′ end processing factors, and their association with prognosis, tumor microenvironment, and potential targets
Source: Research Square preprint supplement (doi:10.21203/rs.3.rs-3421663/v1), 2023-10-12
Supplement: Supplementary file 4 [file 8ee037cf611a507e24ca5945.xlsx]

## Sheet: Sheet1
Gene	cancer	HR	HR.95L	HR.95H	pvalue
CLP1	READ	0.242966	0.0971228	0.607814	0.002493
	KIRC	0.403552	0.250634	0.649768	0.000188416
	LIHC	1.69879	1.05412	2.7377	0.0295215
	LGG	2.64163	1.53927	4.53345	0.000423193
	KICH	53.9216	3.46759	838.489	0.00439796
CPSF1	THYM	0.188212	0.0431247	0.82143	0.0263091
	PAAD	0.674499	0.467302	0.973566	0.0354628
	LIHC	1.33954	1.03375	1.73579	0.0270365
	SARC	1.86099	1.31697	2.62972	0.000430467
	MESO	2.08699	1.23166	3.53629	0.00625
	KIRC	2.26732	1.69623	3.03068	3.2224e-08
	ACC	2.51585	1.34201	4.71643	0.00400976
CPSF2	LUSC	0.692756	0.49552	0.9685	0.0317788
	BLCA	1.48833	1.04749	2.11469	0.0264957
	LIHC	2.356	1.44476	3.84198	0.000593274
	UVM	2.8809	1.24288	6.67768	0.0136292
CPSF3	THYM	0.138721	0.0237941	0.808753	0.0280965
	DLBC	0.139575	0.0206818	0.941954	0.0432438
	LGG	1.5416	1.00257	2.37042	0.0486477
	UCEC	1.80888	1.1451	2.85744	0.0110606
	KIRC	1.87726	1.13431	3.10682	0.0142749
	MESO	2.04919	1.02837	4.08333	0.0414015
	LIHC	2.52177	1.74814	3.63778	7.50955e-07
	ACC	3.64879	1.59813	8.33079	0.00211908
	KIRP	3.82383	1.57251	9.29826	0.00309192
	PCPG	19.3492	1.29335	289.475	0.0318475
CPSF4	PAAD	0.42742	0.235665	0.775201	0.00513822
	BRCA	0.591379	0.402577	0.868726	0.00742446
	LUSC	0.722607	0.560756	0.931174	0.0120346
	LIHC	1.48383	1.136	1.93817	0.00378481
	KIRC	2.42125	1.60371	3.65557	2.58718e-05
	LGG	2.62646	1.85798	3.71278	4.5596e-08
	ACC	2.63558	1.16023	5.98697	0.0206134
	KICH	23.7439	3.3145	170.092	0.00161734
NUDT21	READ	0.404083	0.199057	0.820283	0.0121293
	GBM	0.595869	0.385958	0.919944	0.019463
	KIRC	0.645457	0.492442	0.846018	0.0015182
	SKCM	0.756672	0.608925	0.940269	0.0118817
	LIHC	1.45421	1.05063	2.01282	0.0239628
	PAAD	1.96248	1.15324	3.33956	0.0129332
	ACC	2.40115	1.13412	5.08368	0.0220894
	PRAD	3.72569	1.08048	12.8468	0.0372943
CPSF6	READ	0.277158	0.111923	0.686334	0.00554541
	LAML	0.567048	0.337275	0.953359	0.0323427
	SARC	1.43145	1.13308	1.80839	0.00263338
	ESCA	1.58593	1.03198	2.43723	0.0354157
	LIHC	2.1179	1.51873	2.95346	9.74455e-06
	KIRP	2.12753	1.25686	3.60136	0.00493498
	ACC	3.45652	1.57637	7.57913	0.00196081
	PRAD	5.42228	1.05396	27.896	0.0430892
CSTF1	KIRC	0.280816	0.153883	0.512451	3.49763e-05
	LIHC	1.64528	1.06035	2.55288	0.0263224
	UCEC	1.65575	1.06612	2.57147	0.0247664
	LGG	2.08696	1.01996	4.27016	0.044001
	ACC	2.52541	1.16937	5.45396	0.0183612
	PRAD	21.2863	1.65878	273.157	0.0188419
CSTF2	SARC	1.421	1.04257	1.9368	0.0261602
	LIHC	1.85352	1.4569	2.35811	5.07988e-07
	MESO	1.89204	1.07114	3.34204	0.0280402
	PAAD	2.22907	1.31214	3.78675	0.00302958
	LAML	2.90032	1.35957	6.18717	0.00587698
	KICH	27.2886	3.78869	196.551	0.00102997
CSTF2T	LGG	0.237747	0.146251	0.386483	6.84063e-09
	MESO	0.385341	0.235029	0.631784	0.000156612
	KIRC	0.539734	0.388701	0.749453	0.000231443
	LIHC	1.40785	1.02955	1.92514	0.0321652
CSTF3	READ	0.387391	0.195311	0.768375	0.00664728
	SKCM	0.71477	0.533725	0.957227	0.0242398
	OV	0.717373	0.530994	0.969171	0.0304665
	SARC	1.68875	1.0041	2.84026	0.0482261
	LIHC	1.87132	1.21201	2.88929	0.00469014
	KIRC	2.38572	1.38664	4.10464	0.00168546
	ACC	6.14884	2.73823	13.8076	1.07993e-05
	KICH	14.3987	2.58414	80.2288	0.00234052
FIP1L1	UCS	0.389247	0.172131	0.880224	0.0234262
	LIHC	1.72349	1.19079	2.4945	0.00390695
	SARC	2.23472	1.40833	3.54605	0.000641477
	KICH	10.5899	1.39949	80.1332	0.0222852
PAPOLA	OV	0.689784	0.520972	0.913296	0.0095066
	SKCM	0.780066	0.620229	0.981094	0.0337442
	LIHC	1.9199	1.33113	2.76908	0.000481812
	KIRP	2.71174	1.36028	5.40588	0.00459548
	PRAD	8.76553	1.45094	52.9549	0.0180025
PCF11	MESO	0.516006	0.290243	0.917374	0.0242138
	STAD	0.580316	0.378549	0.889625	0.0125422
	BLCA	0.642188	0.467904	0.88139	0.00611549
	HNSC	0.698934	0.53147	0.919165	0.0103741
	LUAD	0.70172	0.51629	0.953747	0.0236707
	ACC	3.71844	1.61827	8.54417	0.00197486
SYMPK	UVM	0.0806477	0.0166171	0.391406	0.0017853
	PAAD	0.474647	0.291383	0.773173	0.00275967
	HNSC	0.717903	0.518958	0.993113	0.0453166
	LUAD	1.3552	1.05829	1.73542	0.015999
	KIRC	1.67623	1.08409	2.59183	0.0201761
	MESO	2.25969	1.23027	4.15047	0.00858845
	ACC	3.408	1.68862	6.87808	0.000621021
	PCPG	5.81003	1.10633	30.512	0.0375825
WDR33	THYM	0.041182	0.00324321	0.522926	0.0138957
	SKCM	0.580685	0.378296	0.891352	0.0129184
	LIHC	1.75232	1.0782	2.84794	0.0235855
	ACC	6.17046	2.06909	18.4016	0.00109769
