# Supplementary material for: A pan-cancer analysis of the core pre-mRNA 3′ end processing factors, and their association with prognosis, tumor microenvironment, and potential targets
Source: Research Square preprint supplement (doi:10.21203/rs.3.rs-3421663/v1), 2023-10-12
Supplement: Supplementary file 5 [file a94a69ac44093a11ed2d1b3a.xlsx]

## Sheet: panGeneExp
ID	CPSF1	WDR33	FIP1L1	CPSF4	CPSF2	CPSF3	NUDT21	CPSF6	PCF11	CLP1	RBBP6	PAPOLA	SYMPK	CSTF2	CSTF3	CSTF2T	CSTF1	Type	CancerType
TCGA-OR-A5JP-01A	4.88536	2.52075	2.27871	2.80455	2.61332	3.03117	4.05061	3.38315	2.41828	2.1449	3.69937	4.2921	5.32999	2.21666	3.15333	3.03626	3.51236	Tumor	ACC
TCGA-OR-A5JG-01A	3.51315	2.09427	2.26471	3.3015	2.64629	3.47983	4.39225	3.18166	2.13987	1.13523	3.01101	4.0957	4.34917	2.50038	2.41333	4.0429	3.15024	Tumor	ACC
TCGA-OR-A5LG-01A	3.94722	2.50718	2.89819	3.15341	2.51573	3.05849	4.38405	3.56163	2.64352	2.19928	2.46373	3.85076	3.77623	2.21345	2.40873	3.73621	2.97525	Tumor	ACC
TCGA-OR-A5JR-01A	4.15311	1.73249	2.61505	2.86069	2.0697	3.12681	4.05936	3.1746	2.03746	2.0052	2.47986	3.56904	3.13025	3.13279	1.94487	3.32127	2.89623	Tumor	ACC
TCGA-OR-A5KU-01A	3.54652	1.89176	2.65637	3.1079	2.07685	3.03257	3.94033	3.24933	2.68009	2.17017	3.38305	3.63503	3.72438	2.6184	2.64127	3.36818	3.38431	Tumor	ACC
TCGA-OR-A5LS-01A	3.178	1.71845	2.35531	2.99124	2.87627	2.70219	4.86426	3.64299	2.65732	1.96207	3.09996	4.52131	3.75311	3.02367	2.41311	5.15328	3.31669	Tumor	ACC
TCGA-OR-A5L9-01A	2.75231	0.943482	0.719658	0.955678	0.742149	1.93332	2.22242	1.20086	1.07053	0.500845	1.82641	1.99145	1.83562	1.04271	0.858117	1.55074	1.15985	Tumor	ACC
TCGA-OR-A5JQ-01A	3.86381	1.90851	2.66327	2.85887	2.25853	3.19372	4.26537	3.18865	1.79439	2.01464	2.59933	3.47783	3.73805	2.87133	2.52216	3.38554	3.04811	Tumor	ACC
TCGA-OR-A5K4-01A	4.73266	2.15883	3.01392	3.41251	2.03074	3.65961	4.98325	3.47483	2.13406	2.17742	3.15292	4.20703	3.03097	3.77874	2.7235	3.22725	3.57971	Tumor	ACC
TCGA-OR-A5JL-01A	3.10582	1.91341	2.82674	3.14586	3.23168	2.84001	3.43075	3.05603	2.04844	2.36343	2.04671	5.09323	2.08627	2.97171	1.88337	3.58173	2.66615	Tumor	ACC
TCGA-OR-A5LC-01A	4.8488	2.61137	2.45154	3.46043	2.36929	4.14856	4.31579	3.72094	2.19595	1.35815	3.08662	3.98525	3.97373	2.53485	2.89149	3.2954	3.30172	Tumor	ACC
TCGA-OR-A5K2-01A	3.62712	1.70011	1.90939	2.92909	1.99658	3.14041	3.59398	2.85907	2.25688	1.85281	2.39507	3.89951	4.31085	2.07254	2.91284	3.89207	3.08304	Tumor	ACC
TCGA-P6-A5OG-01A	4.23654	2.38072	2.43496	3.79108	2.50837	3.93854	4.77941	3.30229	2.87441	3.0481	2.5359	3.45474	3.39925	3.66859	3.93745	3.41198	2.8421	Tumor	ACC
TCGA-OR-A5JW-01A	3.77521	2.07968	2.87736	2.79628	2.70717	2.59074	4.02868	3.27214	2.66212	1.93144	3.08882	4.44402	3.6973	2.82625	2.14093	5.64029	3.21367	Tumor	ACC
TCGA-OR-A5KO-01A	4.64944	2.11184	3.1755	3.22381	2.90783	3.63451	4.86141	3.65356	2.86937	2.16634	3.31554	4.74334	3.71552	3.21087	3.06623	3.83214	2.58842	Tumor	ACC
TCGA-OR-A5J8-01A	3.87305	2.3776	2.62706	3.8637	2.23399	3.47839	3.53276	2.92976	1.70046	2.78653	2.12686	3.5525	3.71444	2.63944	2.60885	3.39384	2.77589	Tumor	ACC
TCGA-PA-A5YG-01A	3.08981	1.85604	2.04607	2.82549	1.99059	3.02682	4.18323	2.95602	2.08936	1.89234	2.46218	3.45682	3.18996	3.22893	2.00136	3.55348	2.57057	Tumor	ACC
TCGA-OR-A5KV-01A	4.51736	2.36157	2.57247	2.90163	2.57545	3.50435	3.78087	3.37168	2.26978	2.74895	2.44992	4.04749	3.6642	2.61006	3.09315	3.90828	3.209	Tumor	ACC
TCGA-OR-A5L4-01A	3.28177	1.89297	1.79937	2.99946	2.69385	2.99817	4.21419	2.72071	1.78005	1.8404	2.437	4.45179	2.97642	2.47422	2.12503	3.48641	2.89174	Tumor	ACC
TCGA-OR-A5KX-01A	5.09042	2.83382	2.13946	2.87722	2.1417	2.92017	3.40454	4.65364	1.86796	2.13902	3.51215	3.94697	4.64113	2.60525	2.24007	3.77314	3.05219	Tumor	ACC
TCGA-OR-A5L8-01A	4.74938	2.35403	2.72396	2.88347	3.29225	2.97982	4.58855	3.7498	2.97702	2.04061	3.0112	4.51095	3.86542	2.96254	2.71452	4.52893	2.91139	Tumor	ACC
TCGA-OR-A5JO-01A	3.38859	2.4769	3.03325	2.63583	2.06522	3.22832	3.46132	2.80076	2.28744	2.67683	2.5188	3.58092	3.23832	2.32179	2.46248	3.13902	2.899	Tumor	ACC
TCGA-OR-A5JA-01A	3.96786	2.04032	2.54416	3.1783	2.59365	3.49853	4.0449	3.3899	2.42415	1.98684	3.48053	4.09977	3.70518	2.85943	2.64529	3.16396	2.63472	Tumor	ACC
TCGA-OR-A5LO-01A	3.69179	2.1412	2.28414	3.0837	1.89571	2.26577	4.32995	3.40199	2.78398	1.6639	2.65781	4.5606	3.73374	2.82901	1.97459	3.78271	2.41986	Tumor	ACC
TCGA-OR-A5JM-01A	3.77764	2.52837	2.57286	2.08664	2.24131	3.70395	3.99125	4.10361	2.1446	2.22336	2.89144	3.99336	4.11878	2.91321	2.97356	3.01338	3.22829	Tumor	ACC
TCGA-OR-A5JV-01A	4.06336	1.92814	2.62606	3.16688	2.36593	3.40422	3.48013	3.26288	1.90743	1.86385	2.77497	3.73975	3.49884	3.29886	1.92652	3.38413	2.85289	Tumor	ACC
TCGA-OR-A5JB-01A	5.23985	2.82342	2.14141	3.62091	2.73532	4.26594	4.57865	3.55569	2.42037	2.38423	2.51981	4.24394	3.61965	3.87688	3.34967	3.40177	3.07561	Tumor	ACC
TCGA-OR-A5LA-01A	3.23822	1.44439	1.93476	2.69395	1.33761	2.82215	3.4143	2.19325	1.146	1.55795	1.71181	2.70236	2.18891	1.66453	1.26865	2.77206	2.11513	Tumor	ACC
TCGA-OR-A5JE-01A	3.52292	2.27767	1.97156	2.87447	2.23115	3.67374	4.16156	2.58412	2.39146	2.50091	2.5908	3.71508	4.17385	2.108	2.69854	3.06536	4.19474	Tumor	ACC
TCGA-OR-A5JZ-01A	3.63448	1.96791	2.35321	2.82698	1.86189	3.35908	4.33865	3.32449	1.96733	1.6723	2.92733	3.88828	2.68522	3.36906	1.99331	3.58646	3.02171	Tumor	ACC
TCGA-OR-A5KT-01A	3.64821	2.22738	2.17001	3.23273	1.9885	3.13127	3.144	3.07913	2.29501	2.21337	3.042	3.49309	3.17618	2.09252	2.69063	3.31695	2.86261	Tumor	ACC
TCGA-OR-A5KZ-01A	5.24396	2.61767	3.06038	3.6209	2.33801	3.95306	5.11565	4.10068	2.25255	2.23219	3.38341	4.1342	3.86081	3.11635	3.17691	3.38306	3.71463	Tumor	ACC
TCGA-OR-A5LJ-01A	3.43004	1.96734	2.00866	3.47193	1.93916	2.81861	3.67126	3.692	2.71485	1.81913	2.63961	3.68619	4.05991	3.04602	2.56703	3.4559	3.15944	Tumor	ACC
TCGA-OR-A5LB-01A	3.73286	1.95779	3.09923	3.63794	2.67427	2.69865	3.77161	3.81138	2.50188	1.74625	3.57947	4.61914	4.03752	2.91606	2.40733	4.4717	3.6137	Tumor	ACC
TCGA-OR-A5LT-01A	3.50076	1.61151	2.73662	1.92195	1.89689	3.03375	3.64396	3.2278	2.36781	1.29452	2.96621	3.30571	3.76462	2.56652	2.52805	4.67222	2.80143	Tumor	ACC
TCGA-OR-A5LD-01A	4.80494	1.9838	1.21789	2.12577	1.6418	3.84707	2.54163	2.47451	2.51562	1.55438	2.47843	3.36788	3.79295	1.18412	2.70637	1.97716	1.89889	Tumor	ACC
TCGA-OR-A5J2-01A	3.48901	1.98243	2.35972	3.03137	2.22916	2.551	3.89472	3.71134	2.49042	1.80894	2.64125	4.00797	3.10446	2.7611	2.30296	3.76579	3.11636	Tumor	ACC
TCGA-PK-A5HB-01A	3.49366	0.842596	2.90463	2.71941	3.00727	4.09141	3.86292	3.06964	1.84938	1.73141	3.44637	4.93588	3.90583	2.961	3.03179	3.98331	3.45944	Tumor	ACC
TCGA-OR-A5JS-01A	3.85298	2.29353	2.0637	3.12296	3.2081	3.40802	4.79906	3.31537	2.8659	1.86239	3.07922	4.08723	3.39799	2.81408	2.68296	3.3228	3.56013	Tumor	ACC
TCGA-OR-A5K6-01A	3.62722	2.51022	2.51921	3.66913	2.90129	3.64569	3.94844	3.34163	2.03465	1.36103	2.75987	4.27455	3.89651	2.47236	2.4357	4.16388	3.34281	Tumor	ACC
TCGA-OR-A5JY-01A	3.94683	2.10599	2.80067	3.61261	2.32301	3.30746	3.21581	3.71785	2.40425	2.48869	2.32264	3.58759	3.58426	2.41542	2.01675	2.46311	3.04226	Tumor	ACC
TCGA-OR-A5JT-01A	4.18347	1.94207	2.67897	2.64102	2.15524	3.36034	4.14789	3.52571	2.00118	2.08772	2.85794	3.47289	2.6153	3.1164	2.12833	3.44637	2.86789	Tumor	ACC
TCGA-PK-A5H8-01A	4.78685	2.07562	1.96963	3.53998	2.23135	3.14578	3.95271	3.29828	2.67467	1.64099	3.14605	4.28639	3.55429	2.62226	2.29718	3.37951	2.51204	Tumor	ACC
TCGA-OR-A5JX-01A	4.77938	1.71803	1.94436	2.71229	1.8542	2.60704	3.51196	2.88529	2.34241	1.60874	3.12371	4.48031	3.70705	2.25438	2.19505	3.47866	2.48003	Tumor	ACC
TCGA-OR-A5LK-01A	3.0114	1.68709	2.01282	2.38193	1.10322	2.20573	2.58882	2.77923	1.98656	1.12746	1.81913	2.92089	3.03507	2.38109	1.62965	2.39162	2.29467	Tumor	ACC
TCGA-P6-A5OF-01A	4.69335	1.87978	2.97311	3.23626	2.19134	2.61294	4.17838	3.65674	2.3975	1.1865	2.78881	4.25918	3.54138	2.69744	2.34476	4.13249	2.59914	Tumor	ACC
TCGA-OR-A5JI-01A	3.03061	1.46492	1.99848	1.6934	1.89012	2.75054	3.24593	2.47541	1.77199	1.49277	2.30449	3.01897	2.89075	2.39964	1.71385	3.2518	2.55432	Tumor	ACC
TCGA-OR-A5K5-01A	4.37435	2.44526	2.7475	2.27482	2.19394	3.64411	3.84545	3.27875	2.88617	2.18999	2.97517	3.82172	4.10961	2.4916	2.50773	2.79246	3.14947	Tumor	ACC
TCGA-OR-A5JC-01A	4.22617	1.87042	2.30275	2.61885	1.7102	2.73448	3.8106	3.13747	2.30068	1.90812	2.79944	3.71445	3.67032	2.70854	2.45642	3.65274	2.92383	Tumor	ACC
TCGA-OR-A5KW-01A	4.45416	1.71225	2.88909	3.69437	1.82961	2.74989	4.10286	3.19609	2.2643	1.97241	2.70435	4.84304	3.82606	2.80739	2.28999	3.83777	2.61094	Tumor	ACC
TCGA-OR-A5JJ-01A	4.83412	2.08843	3.31326	3.60342	2.55829	3.22608	4.95728	3.60405	2.6709	1.71735	3.04462	4.36523	3.51489	2.82033	2.7944	3.35612	3.75467	Tumor	ACC
TCGA-OR-A5JD-01A	3.47588	1.66791	2.10264	2.35858	1.76946	2.70276	3.36259	3.19183	1.8946	1.65669	2.51307	2.98563	3.04218	2.31579	2.18248	3.89029	2.66354	Tumor	ACC
TCGA-OR-A5LM-01A	3.71015	1.97394	2.56764	3.24217	2.00469	2.87111	4.03236	3.12057	1.90809	2.06251	2.46423	3.92199	3.35965	2.85602	2.0109	3.79501	3.09196	Tumor	ACC
TCGA-PK-A5HA-01A	3.59004	1.96539	2.2702	2.51632	2.12596	2.88745	3.45877	3.22307	1.61191	1.29785	3.62243	3.57282	3.16843	3.10128	1.80007	2.8893	2.72595	Tumor	ACC
TCGA-OR-A5JF-01A	4.3427	1.83398	2.70567	2.62665	2.06677	2.79538	3.8386	3.02081	2.40468	2.00394	3.12357	3.51565	3.65976	2.36046	2.44848	3.82536	3.48839	Tumor	ACC
TCGA-OR-A5LH-01A	2.77307	2.12832	2.66338	3.6277	1.67592	3.07392	3.44109	3.14145	1.99763	2.24515	2.26041	3.73957	2.41638	2.66138	2.03198	3.25407	2.49036	Tumor	ACC
TCGA-OR-A5K1-01A	3.67682	1.63519	1.98496	3.5677	1.77557	3.36507	4.02056	3.03778	1.92744	1.80627	2.55905	3.50829	2.62463	3.08085	2.0919	3.25547	2.87681	Tumor	ACC
TCGA-OR-A5LN-01A	3.27745	1.46878	1.91422	2.05534	1.39846	2.33641	2.57082	2.58856	1.77217	1.37907	2.01682	2.82866	2.65736	1.99831	1.76386	3.15873	2.16066	Tumor	ACC
TCGA-OR-A5LE-01A	3.84281	2.43814	2.73188	3.09833	2.9589	4.14912	3.83797	3.17233	2.80517	1.93183	2.56552	4.73869	3.36449	2.57409	3.05448	2.95894	3.64944	Tumor	ACC
TCGA-OR-A5L3-01A	3.14725	1.53648	1.41827	1.67983	1.8473	2.55917	2.48599	1.79695	1.97818	1.02469	1.79879	2.83085	1.7681	1.61299	1.87604	2.15158	1.88118	Tumor	ACC
TCGA-OU-A5PI-01A	3.71766	2.37212	2.94932	2.86576	2.81629	2.6845	4.52907	3.54752	2.45121	2.12812	2.6673	4.36241	4.12663	3.57196	2.09282	4.73214	3.46787	Tumor	ACC
TCGA-OR-A5K8-01A	3.29005	1.43942	2.06874	2.84346	1.52526	2.78659	3.55022	2.65709	1.80693	1.39319	2.46871	3.20105	2.88721	1.85756	1.98323	4.27151	2.53904	Tumor	ACC
TCGA-OR-A5K0-01A	3.9993	2.39798	2.60268	3.60649	2.64241	3.55772	3.20923	3.19391	3.19782	2.69542	2.974	4.08458	3.96427	2.49558	3.17566	3.59132	3.72409	Tumor	ACC
TCGA-OR-A5KY-01A	3.57342	1.99719	2.17253	3.05809	1.85294	2.77118	4.65502	3.49805	2.36038	1.92555	3.00085	3.62619	4.18165	2.30419	2.88837	3.78947	3.29809	Tumor	ACC
TCGA-OR-A5J9-01A	4.76191	2.21754	2.74297	2.72453	2.1351	2.94658	4.41351	3.71311	2.38258	2.12663	3.02014	3.97604	4.27783	2.51707	2.71672	4.4344	3.22562	Tumor	ACC
TCGA-OR-A5J1-01A	4.06342	2.65342	2.03378	2.62821	2.16138	2.96581	3.66497	3.4937	3.44091	2.08379	2.52736	4.23823	2.55282	2.1741	3.06635	2.72037	2.90663	Tumor	ACC
TCGA-OR-A5J5-01A	4.97184	1.60028	1.92857	2.84848	1.9598	2.43612	3.46461	2.87116	2.50362	1.20135	3.64222	3.93038	3.64145	1.99167	2.38506	3.21386	1.8534	Tumor	ACC
TCGA-OR-A5L6-01A	3.58753	1.78394	1.71345	2.09851	1.62724	3.46698	3.35248	3.07934	2.54665	1.17233	2.87108	2.8216	3.10329	1.83468	2.38764	2.50025	2.86548	Tumor	ACC
TCGA-OR-A5LP-01A	3.26783	1.85536	2.02703	2.63408	2.00933	2.99436	4.00468	2.97184	2.36104	2.00893	2.59219	3.34913	3.34321	2.9706	2.13628	3.76262	2.66912	Tumor	ACC
TCGA-OR-A5K9-01A	4.23563	2.33017	2.97877	2.94122	2.7918	3.56164	4.13925	3.48203	2.19574	1.71027	3.07895	4.45331	4.2404	2.37506	2.57705	4.23488	3.51074	Tumor	ACC
TCGA-OR-A5J7-01A	3.96125	2.09381	2.66443	3.197	1.88408	3.37482	3.61273	3.44587	2.88704	2.41099	3.48957	3.73387	4.06738	2.48995	2.08226	4.40985	3.47067	Tumor	ACC
TCGA-PK-A5H9-01A	3.66972	2.57953	2.49939	2.43492	2.36258	3.08848	3.9355	3.13232	2.67934	2.96325	2.8424	4.12875	3.25524	2.68035	2.20635	3.38516	2.97901	Tumor	ACC
TCGA-OR-A5LR-01A	3.58654	2.08323	2.20888	2.16882	1.82554	3.4935	4.06484	3.52562	2.29914	1.96163	3.01706	3.90105	2.54257	3.15284	2.00483	3.43032	3.08952	Tumor	ACC
TCGA-OR-A5JK-01A	4.30618	1.69597	2.4748	3.43349	1.53712	3.09492	3.76267	2.95184	2.35308	1.72414	2.49728	3.36897	2.95994	2.2352	2.39584	3.80871	2.74112	Tumor	ACC
TCGA-OR-A5J6-01A	3.38542	2.39731	2.1863	2.74662	1.92945	3.66041	3.18536	2.67538	1.86201	2.1856	1.9559	3.57841	3.34081	1.44569	1.96097	3.63564	2.57208	Tumor	ACC
TCGA-OR-A5LL-01A	3.97915	2.53678	3.28341	2.77261	3.55377	3.11609	3.85506	3.31922	3.26332	2.24095	3.00436	4.58565	3.38856	2.77548	3.0871	5.53491	3.04319	Tumor	ACC
TCGA-OR-A5K3-01A	3.22894	1.43726	1.66193	3.17031	1.36411	2.4143	3.57084	2.52226	1.59137	1.41571	2.32016	3.14786	3.04158	2.13596	1.80286	2.78039	2.31947	Tumor	ACC
TCGA-OR-A5J3-01A	3.78175	1.85317	1.97014	3.5314	2.53724	2.95427	3.9718	3.18728	2.42978	1.93497	2.88026	4.15003	3.53378	2.81574	2.32619	3.63067	2.83603	Tumor	ACC
TCGA-OR-A5L5-01A	3.86169	1.86227	2.00072	2.18486	1.78605	3.29686	3.78905	3.28837	2.15775	1.84579	2.64981	3.40328	2.47708	2.98957	2.16799	3.02985	2.80519	Tumor	ACC
TCGA-FD-A3SS-01A	4.49181	2.89155	2.90939	3.1002	2.64732	4.63091	3.71591	3.5282	2.38048	2.20824	3.09899	3.83383	3.49776	3.90752	2.8951	3.32787	3.02869	Tumor	BLCA
TCGA-FD-A43S-01A	4.43005	2.62048	2.13565	3.21177	1.93474	3.42906	3.13464	2.8508	2.19418	2.1515	2.18488	3.16907	3.83765	2.7049	2.7237	3.11381	2.73459	Tumor	BLCA
TCGA-UY-A78K-01A	4.8869	2.91002	2.98152	3.40413	2.01592	4.37274	4.25843	3.98146	2.72089	2.95397	2.83398	3.2848	3.88229	3.45507	3.27856	3.12269	3.4228	Tumor	BLCA
TCGA-DK-A2HX-01A	3.18304	1.84904	2.61103	2.60502	2.47298	3.00965	3.69126	3.35172	2.16405	2.6814	2.25676	3.92148	3.45626	3.26243	2.199	2.50905	2.82586	Tumor	BLCA
TCGA-DK-A1A3-01A	3.64059	1.9459	2.70183	2.59355	1.97992	4.13876	3.47189	3.64556	2.52378	3.03637	2.36416	3.56824	3.33852	3.48287	3.14184	4.245	3.39296	Tumor	BLCA
TCGA-GC-A6I3-01A	4.62529	2.4188	1.68187	4.11106	1.9162	5.16659	3.22347	3.27391	2.07447	2.15176	2.06117	3.83144	4.90654	3.48913	3.52395	2.67142	3.25888	Tumor	BLCA
TCGA-XF-AAMJ-01A	4.75516	2.33574	2.41796	2.70073	2.12367	3.73607	3.99521	3.08122	2.16731	2.09615	2.74251	3.59749	3.66752	3.4815	2.7267	2.71876	2.67454	Tumor	BLCA
TCGA-GC-A6I1-01A	4.87411	2.57649	2.411	3.73246	2.49043	4.66855	4.4607	3.45634	1.7345	3.58827	1.95991	3.89938	4.09916	3.65491	3.39824	3.12771	2.64505	Tumor	BLCA
TCGA-ZF-A9RL-01A	4.61302	2.70376	3.10683	2.89539	2.81407	3.90338	4.98151	4.10663	3.41699	2.77013	3.51152	4.51617	3.94576	3.88274	3.20488	3.73997	3.27518	Tumor	BLCA
TCGA-DK-A3IL-01A	4.00375	2.40587	2.61568	3.36237	2.12706	4.17765	4.12709	3.80509	3.0077	2.54988	3.18768	3.38302	3.4744	3.87196	2.81409	2.57737	3.77515	Tumor	BLCA
TCGA-E7-A6MF-01A	4.40448	2.95857	2.7736	3.11191	2.3625	3.45314	4.77897	3.99957	3.56893	2.70858	3.35687	4.22962	3.58751	3.33301	3.00624	3.99856	3.23655	Tumor	BLCA
TCGA-BT-A20R-01A	3.76746	2.24467	2.34695	2.45056	2.63206	4.55321	4.41262	3.56153	2.21081	2.22921	2.34357	4.13102	3.24362	3.50054	2.5859	2.85833	2.63109	Tumor	BLCA
TCGA-H4-A2HQ-01A	5.38092	2.91707	2.91756	3.27291	2.38564	4.84155	5.07729	5.29132	2.95318	2.68817	3.42466	4.02923	3.80982	3.63497	3.12495	3.33547	3.64285	Tumor	BLCA
TCGA-GV-A3QH-01A	5.48682	2.74771	2.94035	3.37488	2.97082	4.21763	3.8407	4.1933	2.82008	3.04328	3.24694	4.47462	4.383	4.01313	3.14616	3.11986	3.3422	Tumor	BLCA
TCGA-4Z-AA82-01A	3.71481	2.92012	2.63151	3.00651	2.81077	3.86854	4.21498	3.61148	2.54784	2.54911	3.14265	3.81354	3.98402	3.57408	2.79416	3.29696	3.02777	Tumor	BLCA
TCGA-E7-A4XJ-01A	4.08282	2.23996	2.28107	3.06325	1.92215	3.54373	2.92062	3.20889	2.54147	1.99121	2.84971	3.49026	3.91007	2.82755	3.27332	0.362058	2.74677	Tumor	BLCA
TCGA-XF-A8HE-01A	4.09661	2.69232	2.83794	3.95757	2.78969	3.77117	3.39143	4.1602	2.31383	2.49371	2.77956	3.92833	3.76938	3.27962	3.74742	3.62731	2.36027	Tumor	BLCA
TCGA-XF-A9T0-01A	4.92872	2.49273	2.89281	3.4432	1.94047	4.32184	4.15579	3.82964	2.86304	2.50452	2.93443	3.45597	3.66611	3.4452	3.64259	3.20614	3.75416	Tumor	BLCA
TCGA-FD-A5BT-01A	4.73966	1.90025	2.06362	3.20829	1.86201	3.461	2.74601	2.12117	1.10724	2.67422	1.50867	2.71285	3.75168	2.93715	2.42693	1.84023	2.56447	Tumor	BLCA
TCGA-FD-A3SN-01A	4.51827	2.67572	3.08978	3.41437	1.95563	3.95532	4.30282	3.52719	2.50024	2.83806	3.0123	3.26957	3.52554	3.78575	2.44478	3.24461	2.30011	Tumor	BLCA
TCGA-G2-AA3C-01A	4.00835	2.53741	2.20843	3.87273	2.3602	4.13202	3.64286	3.41968	1.78627	2.86176	1.67763	3.31306	4.37931	3.52055	3.26158	2.88777	2.96966	Tumor	BLCA
TCGA-HQ-A2OE-01A	4.84974	2.93962	3.44301	4.07315	2.67775	4.5816	4.34904	4.49198	2.32086	2.9198	2.7775	4.45938	3.83842	3.7979	3.4625	3.68202	3.70881	Tumor	BLCA
TCGA-BL-A3JM-01A	4.55516	2.77325	3.1023	3.4865	2.9209	3.8316	5.12049	4.75254	2.95104	2.33442	3.27258	3.94738	4.19638	3.82384	4.45652	1.05459	3.79054	Tumor	BLCA
TCGA-XF-AAN3-01A	3.29018	2.56833	2.5357	2.82217	2.05369	3.43501	4.00929	3.80528	2.49061	2.135	2.98906	3.82674	3.74338	3.94179	2.91086	3.09289	2.54885	Tumor	BLCA
TCGA-FD-A3SR-01A	4.78377	2.38635	3.26083	3.11408	2.60518	4.5221	3.70935	3.91504	2.66739	2.89879	4.6052	3.69898	3.32133	3.89867	2.98876	2.98056	3.37745	Tumor	BLCA
TCGA-4Z-AA89-01A	4.11205	2.47309	2.97166	3.38248	2.72588	3.75122	4.00738	3.56271	2.86819	1.95634	2.80374	3.99836	3.74559	3.07354	3.40935	2.84442	3.02488	Tumor	BLCA
TCGA-G2-A2EO-01A	3.62322	2.53167	2.97594	3.63976	2.94436	4.06833	4.32567	3.44337	1.98038	1.89128	2.89888	4.3031	3.69079	3.67044	3.19473	2.34064	2.90207	Tumor	BLCA
TCGA-ZF-AA5H-01A	5.09379	2.41552	3.26706	3.1567	3.1944	3.76426	3.95874	3.58703	2.07682	2.23901	2.61945	4.62929	3.12527	3.40816	3.19402	3.38533	2.68224	Tumor	BLCA
TCGA-BT-A20V-01A	4.36277	2.72451	2.60276	3.55861	2.24369	4.86661	4.73813	3.76475	1.65393	3.44492	3.04608	3.47951	4.14762	3.92066	2.88656	3.05197	2.57648	Tumor	BLCA
TCGA-GC-A3WC-01A	4.50227	2.65402	2.76499	2.9468	2.8221	3.99825	4.25429	4.07554	3.15009	2.30113	3.15478	4.19391	3.55701	4.22918	3.43504	3.11347	2.8978	Tumor	BLCA
TCGA-GV-A3JV-01A	4.60968	2.16673	2.57064	2.93222	2.33489	2.47494	3.86199	3.65132	1.99628	2.29623	2.8025	4.20317	3.51245	3.17277	2.92808	2.83468	2.83959	Tumor	BLCA
TCGA-YF-AA3M-01A	4.97707	2.90653	3.00939	3.38378	2.2763	4.11932	4.16666	4.11799	2.51696	3.35758	2.4644	3.69174	4.38743	4.52474	4.16351	2.82063	2.43768	Tumor	BLCA
TCGA-FD-A3B5-01A	3.7381	2.44309	2.63206	3.0609	2.90934	4.03258	3.58853	3.37528	1.58276	3.00415	2.53047	3.63681	3.80197	3.59502	2.67277	3.05179	2.97474	Tumor	BLCA
TCGA-BT-A20Q-11A	3.45618	2.33028	2.18969	1.66121	2.26013	2.92711	3.63284	2.88683	2.52972	1.8234	2.81161	3.61597	2.5224	2.16775	2.04259	3.07797	2.32957	Normal	BLCA
TCGA-CF-A47V-01A	4.41236	2.51621	2.11099	3.00557	1.90379	3.52518	2.93459	3.10903	2.75351	1.76802	2.90471	3.38436	4.09737	2.57962	3.21696	2.67602	2.75619	Tumor	BLCA
TCGA-GU-A42P-01A	5.2139	2.82615	3.20879	3.69354	2.88696	4.03333	3.51105	4.53278	2.81255	2.33436	3.36094	4.10356	4.29111	3.61204	4.08272	2.75967	3.28142	Tumor	BLCA
TCGA-BT-A20T-01A	3.60418	2.39996	3.01457	2.48078	2.11759	4.15997	4.12793	3.76241	2.25462	2.43851	2.81256	3.49109	3.77013	3.28674	2.90048	3.69917	3.1904	Tumor	BLCA
TCGA-GC-A3BM-11A	3.87606	2.35995	3.01087	2.39212	1.98278	3.07051	4.05829	3.04174	3.12528	1.54843	3.14505	3.70316	3.10126	2.94537	2.80256	3.00741	2.20001	Normal	BLCA
TCGA-XF-AAN0-01A	4.71201	2.62393	2.19536	3.14007	2.20562	3.81271	3.87306	3.17211	2.45691	2.27264	3.34213	3.25331	4.27219	4.13522	3.20271	3.65968	2.89575	Tumor	BLCA
TCGA-E7-A7DV-01A	4.69348	2.0772	2.93642	3.20123	2.59633	4.21471	3.32269	2.91685	1.50156	2.68742	2.2277	3.53575	3.12099	4.11102	2.65518	2.22241	2.83649	Tumor	BLCA
TCGA-GV-A40E-01A	4.24907	2.83646	2.87554	4.27617	2.43187	4.07734	4.05775	3.71668	2.42332	3.9976	2.93299	3.76281	3.71921	4.19745	3.17422	2.37793	3.08136	Tumor	BLCA
TCGA-FJ-A3Z9-01A	5.34575	2.57278	2.64197	2.91216	1.88567	3.70279	3.50353	3.5836	3.07863	2.03002	3.02044	3.76036	3.59484	3.21443	3.49326	2.2812	2.93386	Tumor	BLCA
TCGA-XF-A9ST-01A	5.32886	3.02852	4.4555	4.50275	2.66892	4.79606	3.91194	4.45895	2.34105	3.42638	2.8143	5.08477	4.26876	3.66866	3.18127	3.9197	3.54821	Tumor	BLCA
TCGA-FJ-A3ZF-01A	4.86974	2.52178	2.87619	4.26912	1.93152	4.98377	3.60639	4.41661	3.12145	2.89053	3.69307	3.73658	4.18678	3.87896	3.75492	3.10645	2.8413	Tumor	BLCA
TCGA-K4-A3WV-11A	4.05962	2.74375	2.86802	2.94011	2.28653	3.59269	4.27283	3.54966	3.08305	2.57269	3.13057	3.9144	3.6245	3.28175	3.22595	3.61305	3.26167	Normal	BLCA
TCGA-YC-A89H-01A	5.30474	2.71847	2.58489	2.98238	2.43451	3.55013	3.96228	3.54834	2.23004	2.30637	2.76975	3.79742	3.90546	3.7795	2.99326	2.74268	3.56749	Tumor	BLCA
TCGA-CF-A9FM-01A	4.57061	2.54225	2.93928	2.68158	2.78014	3.96593	4.34016	3.68472	2.84093	2.36558	2.91721	4.34314	3.66369	3.30757	3.35552	3.68651	3.26364	Tumor	BLCA
TCGA-DK-A1AD-01A	4.13044	2.42716	3.10798	3.30039	2.88775	4.14181	4.21263	3.96915	2.33765	2.17583	2.58918	4.50852	3.81222	3.81519	2.85327	2.8796	2.72024	Tumor	BLCA
TCGA-G2-A2EK-01A	5.10264	2.64376	2.69221	3.01096	2.51623	3.69667	4.5092	7.56239	3.15378	2.49243	3.03901	3.7482	2.95052	3.32253	2.58729	3.31658	3.57021	Tumor	BLCA
TCGA-E5-A2PC-01A	3.51573	2.69026	2.93896	3.42025	2.81017	4.10902	4.44636	3.6375	2.41957	2.49276	2.68537	4.07427	3.97796	3.30621	3.96496	2.95024	2.96587	Tumor	BLCA
TCGA-C4-A0F1-01A	3.17853	2.41448	2.47923	2.24215	2.51737	3.75947	3.51661	3.37037	0.958069	2.10847	1.80027	3.63354	3.44197	3.05039	2.67411	3.35043	2.58115	Tumor	BLCA
TCGA-FD-A43N-01A	4.52685	2.44516	2.5485	3.01999	1.99187	3.73208	3.35981	3.59411	2.59017	1.86672	2.66252	3.44377	3.82726	3.29974	2.45993	2.17158	2.3995	Tumor	BLCA
TCGA-BL-A13J-01A	3.96598	2.58608	2.81232	2.46532	3.23594	4.35418	5.32948	3.77186	3.0386	2.56648	3.59449	3.80114	3.24666	3.20812	2.67791	2.24841	3.18941	Tumor	BLCA
TCGA-FD-A3SO-01A	4.2017	2.99259	2.20161	2.88875	3.29417	4.09139	3.86254	3.52276	2.57923	3.25298	3.12912	4.24948	2.99833	3.99468	2.9646	3.52103	3.23417	Tumor	BLCA
TCGA-XF-A8HD-01A	4.68077	2.66236	2.89106	3.33722	2.47028	3.90662	4.02823	3.47973	2.43834	1.89679	2.67349	3.73898	3.83008	3.53547	3.15364	1.26308	3.36775	Tumor	BLCA
TCGA-BT-A20X-01A	4.01932	2.49436	3.12942	3.06002	2.7273	3.85805	4.18671	3.87825	1.80539	2.41192	2.70109	3.84806	3.3924	3.72628	2.68466	3.15034	2.67214	Tumor	BLCA
TCGA-ZF-AA52-01A	4.50499	2.29425	2.40073	3.23443	1.93569	3.53685	3.70738	3.05521	1.96946	1.97807	2.33769	3.41555	3.96226	3.0615	2.62177	1.84937	2.88514	Tumor	BLCA
TCGA-DK-AA76-01A	4.31124	2.92969	2.88941	3.15724	2.90815	3.81271	3.54634	4.22335	3.05898	3.36532	3.36872	4.69734	3.64771	4.03197	3.01487	3.83588	3.6297	Tumor	BLCA
TCGA-GV-A3JW-01A	4.82852	2.70405	2.94331	3.20987	2.71443	5.71722	4.46402	4.33012	3.44298	3.20698	5.18015	4.22717	3.95991	4.06554	3.68038	2.72476	3.73232	Tumor	BLCA
TCGA-FD-A3N6-01A	4.32614	2.77215	3.20049	2.63061	3.33747	3.80037	4.03102	3.71074	2.28597	2.39731	3.06089	4.60146	3.58482	3.35269	3.2919	3.22335	2.66772	Tumor	BLCA
TCGA-BT-A2LA-11A	3.30907	2.34706	2.85881	2.53917	1.81473	3.62857	3.96753	2.67784	2.36932	2.3363	2.77737	3.4558	2.97357	3.07256	3.08036	2.95771	2.93971	Normal	BLCA
TCGA-CU-A5W6-01A	4.04376	2.58811	3.18902	2.9382	2.48501	3.76362	4.09578	3.82174	2.68922	2.94045	3.30734	4.09207	4.06459	4.56213	2.87705	3.57985	3.2616	Tumor	BLCA
TCGA-DK-A2I4-01A	4.69099	2.46107	2.91845	2.62982	2.52608	3.75175	4.06834	3.84167	2.50837	2.52342	2.83573	3.93185	3.83354	3.5939	3.33623	2.603	2.99804	Tumor	BLCA
TCGA-DK-AA6M-01A	5.04747	2.43544	2.62328	3.74182	2.36497	3.62506	3.52543	3.32906	1.98587	2.91147	1.98999	3.6081	4.08385	3.59117	3.6135	1.47275	2.40835	Tumor	BLCA
TCGA-4Z-AA7Y-01A	4.18518	2.42967	2.85846	2.74919	2.69935	4.15334	4.28844	3.40876	2.23387	2.09998	2.25813	4.11027	2.97332	3.25706	3.09206	2.77239	2.78702	Tumor	BLCA
TCGA-DK-A3WY-01A	4.58879	3.06052	3.18679	3.4113	2.69225	4.07686	4.53022	4.04906	3.0026	2.43129	2.9726	4.06187	3.96429	4.11133	2.98967	3.59497	2.9237	Tumor	BLCA
TCGA-E7-A3X6-01A	4.12901	2.71998	3.09328	2.94813	2.95732	3.86905	4.44234	3.63779	2.60559	3.11805	2.77775	3.90851	3.54965	3.83761	2.9737	2.89395	3.18601	Tumor	BLCA
TCGA-K4-A3WV-01A	5.47192	3.32366	2.66309	4.25448	3.27842	4.34104	3.23048	4.27179	2.93957	2.18798	2.93204	4.37923	4.51197	4.43087	3.03355	3.60271	3.1983	Tumor	BLCA
TCGA-DK-A3IQ-01A	4.27809	2.08447	2.31093	2.17538	1.89681	2.93469	3.30221	2.9189	1.83332	1.70889	2.17917	3.21406	2.98432	2.33874	2.05652	2.90852	2.32986	Tumor	BLCA
TCGA-ZF-AA56-01A	3.82782	2.68314	2.84769	2.56748	2.72126	4.06021	3.87605	3.58584	2.29555	2.49957	2.78063	3.91037	3.65454	3.80154	3.17465	2.76413	2.624	Tumor	BLCA
TCGA-CU-A3QU-01A	4.54255	2.34923	3.47311	3.00382	2.82636	4.23025	3.57242	3.47192	2.12463	2.54504	3.28411	4.07205	3.52441	4.80463	3.44368	0.357049	2.78846	Tumor	BLCA
TCGA-FD-A6TI-01A	4.13128	2.16624	2.5295	2.61064	2.30788	3.38925	3.69775	2.91931	2.48195	2.00733	2.48041	3.34044	3.40429	3.21848	3.21907	2.56818	2.52946	Tumor	BLCA
TCGA-XF-A9T3-01A	4.8048	2.59476	3.11058	3.36142	2.92971	3.81942	3.97612	3.45687	2.68604	2.86604	2.8387	3.65608	3.91186	3.24093	3.52977	3.36376	2.8803	Tumor	BLCA
TCGA-FD-A3B3-01A	3.96077	2.58485	2.48509	3.3266	3.01535	4.0106	4.56874	3.86374	2.2898	3.31806	2.57621	3.88857	3.76793	3.80257	3.68386	3.57851	3.18823	Tumor	BLCA
TCGA-BT-A20U-11A	3.53669	2.07519	2.30496	2.82223	2.25018	3.19445	3.67897	3.14029	2.29866	1.95678	2.64585	3.70969	2.74845	4.36993	2.4882	2.90153	2.31651	Normal	BLCA
TCGA-YF-AA3L-01A	5.07416	2.17886	3.03178	3.82073	1.94434	4.17395	2.96914	3.28684	2.07441	2.53315	2.47164	3.34328	3.46564	3.09545	2.97506	2.8195	3.47766	Tumor	BLCA
TCGA-K4-A54R-11A	3.33383	2.30355	2.7026	2.5476	1.77191	2.84938	3.79023	3.50958	3.0898	2.23406	3.12942	3.8856	3.14222	2.55948	2.57199	3.29557	2.44772	Normal	BLCA
TCGA-SY-A9G0-01A	4.50547	2.50657	2.36185	3.02904	2.29032	3.33959	3.89063	5.21781	2.88065	2.28086	2.6084	3.66529	2.9343	2.60947	2.74929	3.52856	2.82007	Tumor	BLCA
TCGA-ZF-A9R2-01A	4.15557	2.46188	3.27389	2.90183	2.70682	3.9318	4.4645	3.83193	2.2463	2.28527	2.94996	4.37287	4.36529	3.29611	3.02138	3.20176	3.48111	Tumor	BLCA
TCGA-GU-AATQ-01A	4.94191	3.21534	3.06275	2.80975	2.97586	3.93462	4.02683	3.81536	2.48339	2.90849	2.90328	4.33347	4.48106	3.96817	3.34896	4.32623	3.20746	Tumor	BLCA
TCGA-FD-A5C1-01A	3.87464	2.14148	3.12944	3.38539	2.06212	4.15528	3.56315	3.23535	1.61413	2.66057	2.36284	3.14398	3.65117	4.03634	2.86055	1.47744	3.55023	Tumor	BLCA
TCGA-DK-A2I1-01A	4.15488	1.84972	1.93098	2.75666	1.95989	4.32948	3.1238	3.25991	2.54831	2.67409	2.94335	3.26775	2.96717	3.44509	2.82812	2.80566	2.72131	Tumor	BLCA
TCGA-CF-A5U8-01A	4.6889	2.43004	2.43596	2.80243	2.04297	3.76595	3.71487	3.39268	2.58943	1.97513	2.50656	3.71867	3.81842	2.74049	3.09094	2.88246	2.98758	Tumor	BLCA
TCGA-UY-A9PB-01A	5.12523	2.60346	2.70283	3.478	2.61994	4.02731	4.02789	3.35919	2.06715	2.94311	2.28529	3.68328	3.69201	4.03089	3.06848	3.23016	3.19071	Tumor	BLCA
TCGA-DK-A3X1-01A	3.81192	1.95249	2.57851	2.39403	3.25208	4.09108	4.11612	3.37203	2.45199	3.15839	2.9409	4.49637	3.4024	3.47825	3.54298	2.93514	3.02404	Tumor	BLCA
TCGA-DK-A1AC-01A	4.5182	2.884	3.22679	2.77058	2.9933	5.16619	3.78418	4.57746	2.30485	3.09346	4.33488	4.20639	3.19061	3.47318	3.15285	4.50971	3.45335	Tumor	BLCA
TCGA-FD-A62N-01A	4.31713	2.21922	2.34925	3.37663	2.33269	3.62437	3.28864	3.07234	1.94773	2.71791	1.79671	3.46821	3.8209	4.15023	3.08214	2.87784	2.15329	Tumor	BLCA
TCGA-DK-AA75-01A	5.38596	2.65554	2.61979	3.56786	2.45911	5.00815	3.516	5.86203	2.13848	2.2899	2.85858	3.70609	4.29788	3.82262	3.65268	3.00768	3.61989	Tumor	BLCA
TCGA-XF-A9SL-01A	3.99726	2.45623	2.39879	3.01647	2.21142	3.3414	3.18495	3.04761	2.23713	2.11263	2.4361	3.37034	3.27279	2.73806	2.68642	3.40735	2.68209	Tumor	BLCA
TCGA-XF-A9T4-01A	4.08827	2.24841	2.7271	2.5853	2.65012	3.76292	4.02654	3.21822	2.04813	2.51215	2.56751	3.7119	3.49769	3.45081	2.95582	3.17999	3.34916	Tumor	BLCA
TCGA-XF-AAN2-01A	4.6751	2.64681	3.14678	3.31884	2.7425	4.55508	3.78424	4.71036	2.18936	3.01731	2.71001	4.15845	4.07777	3.93804	3.49855	3.49117	3.15722	Tumor	BLCA
TCGA-BT-A2LD-01A	3.79679	2.35793	2.3526	3.6913	2.80732	4.53808	3.96116	2.8303	1.83397	2.7081	3.07325	3.13652	3.70421	3.40795	2.7066	2.23783	2.92839	Tumor	BLCA
TCGA-BT-A20N-11A	3.20057	2.2508	2.22838	1.92876	2.30618	2.70969	3.56857	2.86762	2.78115	1.30627	3.19857	3.66207	2.5279	2.11859	2.02458	3.56177	1.99042	Normal	BLCA
TCGA-ZF-A9R1-01A	4.88011	2.6556	3.41858	3.23693	2.85646	3.96874	4.89297	4.04647	2.70429	2.32412	3.13013	4.34191	3.9189	4.09407	2.78496	3.42036	3.52896	Tumor	BLCA
TCGA-ZF-A9R9-01A	4.06586	2.11661	2.30702	2.73876	1.95539	3.27641	3.41025	2.92741	2.24611	1.88918	2.26173	3.67982	3.38222	2.63444	2.91339	1.60451	2.32191	Tumor	BLCA
TCGA-DK-A6AV-01A	4.47836	2.28058	3.38024	3.30702	1.92294	4.64258	4.55977	3.94903	2.18649	2.73327	2.85084	3.77585	3.39037	4.07666	2.86929	2.54161	3.32987	Tumor	BLCA
TCGA-XF-AAMY-01A	3.97269	2.58609	2.84911	2.9744	2.21134	3.20804	4.84316	5.39087	3.00237	2.06633	2.99	3.62596	3.43936	3.0109	2.72954	2.95234	2.6057	Tumor	BLCA
TCGA-GU-A763-01A	4.49387	2.37541	2.24347	3.24121	1.93272	3.96664	3.36429	2.91282	2.121	2.46687	1.97392	3.04432	3.76766	2.66248	3.36522	2.58255	3.00968	Tumor	BLCA
TCGA-FD-A3B7-01A	4.30054	2.39181	2.33198	3.22912	2.90792	4.15945	4.68879	3.4646	2.03814	3.17508	2.79805	4.00003	3.18679	3.84203	2.65139	3.24592	3.02876	Tumor	BLCA
TCGA-FD-A3NA-01A	4.12853	2.58229	3.21329	3.99126	2.66871	4.35177	4.10923	3.52434	2.27807	2.64276	2.88477	4.11985	3.27192	4.1474	3.01093	2.57278	3.36733	Tumor	BLCA
TCGA-CF-A47T-01A	4.4728	2.37306	2.30597	3.03547	2.09329	3.88608	3.38825	3.51746	2.39987	2.06372	2.28857	3.49912	3.77476	3.44197	3.51583	2.36784	3.33658	Tumor	BLCA
TCGA-CU-A0YN-11A	3.36279	2.13964	2.07831	1.91955	2.34009	3.16854	3.8725	2.81739	2.20577	1.8461	2.54868	3.43463	2.55764	2.28592	2.18259	3.76312	2.40933	Normal	BLCA
TCGA-BT-A0S7-01A	3.66476	2.08851	2.84945	2.95993	3.47823	3.96825	5.4414	5.19584	1.67092	2.09564	2.32538	4.12331	3.5084	2.85064	3.26687	3.26259	3.43575	Tumor	BLCA
TCGA-GC-A3BM-01A	4.65872	2.56812	2.56772	3.25958	2.97384	3.93784	5.01583	3.93194	2.50151	2.748	3.44585	4.53171	3.80139	4.16918	2.87434	3.13513	3.7687	Tumor	BLCA
TCGA-GD-A3OP-01A	4.41043	2.5782	2.98883	2.83748	2.65336	3.83972	4.04677	3.56964	2.92546	2.29278	2.94837	4.11309	3.46016	3.9036	3.08304	2.76068	3.25508	Tumor	BLCA
TCGA-SY-A9G5-01A	4.92047	2.69642	2.76393	3.16681	2.38326	4.07877	4.11863	3.57017	2.40156	2.60873	3.08268	3.69487	3.8952	4.05332	2.89141	2.73014	2.99845	Tumor	BLCA
TCGA-KQ-A41S-01A	4.50336	2.24558	2.43438	3.49426	2.42461	3.34466	3.18884	3.36622	2.15176	2.30985	2.5583	3.70932	3.18269	3.35049	2.59162	3.04784	3.1195	Tumor	BLCA
TCGA-4Z-AA7M-01A	3.73025	2.44085	3.20861	4.12557	2.5519	4.14891	3.90321	4.04003	2.73507	2.65212	4.16609	3.5148	3.62135	4.07898	3.19081	2.44754	3.53925	Tumor	BLCA
TCGA-FD-A3SJ-01A	5.28492	2.17518	3.68035	3.38428	2.84595	4.60186	4.28489	4.15802	2.26855	3.26998	3.40896	4.23082	4.89572	3.34363	3.02553	3.38743	3.1431	Tumor	BLCA
TCGA-E7-A677-01A	4.32781	2.965	2.8941	3.28578	2.51122	3.70099	4.15097	3.69639	2.84297	2.74586	3.09474	3.80613	3.9804	3.93452	3.418	3.44717	3.21897	Tumor	BLCA
TCGA-UY-A8OD-01A	4.92068	2.63711	2.50059	2.72105	2.83477	3.98185	3.21284	3.10454	2.15794	1.2378	2.29597	4.05171	3.7402	2.568	3.25201	3.42722	2.89596	Tumor	BLCA
TCGA-DK-AA6L-01A	4.94695	3.17726	3.0427	4.11417	2.40777	4.48821	4.27623	3.7059	2.62854	2.58826	2.64988	4.02648	3.40252	4.30435	2.80604	1.97946	3.39034	Tumor	BLCA
TCGA-GD-A2C5-01A	4.32898	2.33918	2.72276	3.18757	3.15208	4.45415	5.34036	3.67993	2.79901	2.93806	3.06564	4.55626	3.67305	3.73816	2.9824	1.2645	3.40176	Tumor	BLCA
TCGA-K4-A4AC-01A	5.01368	2.47199	2.35339	3.59532	3.01621	4.10033	3.75275	3.46738	2.50592	3.79291	2.22165	3.66049	3.71752	4.49816	3.4588	2.60822	3.51276	Tumor	BLCA
TCGA-FD-A62O-01A	4.80026	2.68312	2.50268	3.3109	2.4769	3.78056	4.20478	3.80629	2.59242	1.72786	2.85745	4.20417	3.58376	3.61065	3.03647	2.9973	3.47879	Tumor	BLCA
TCGA-BT-A2LB-01A	4.36934	2.70942	2.59777	2.97057	2.08864	4.33986	4.09172	3.64535	2.33677	2.3105	2.76008	3.31416	4.04771	3.29683	3.15138	3.42326	2.82273	Tumor	BLCA
TCGA-FD-A3N5-01A	4.83752	2.54776	2.81041	3.36869	3.33346	3.95467	4.58701	3.63687	2.01483	2.29091	2.7504	4.15413	3.56566	4.37496	2.99415	0.614025	2.77947	Tumor	BLCA
TCGA-G2-A3VY-01A	4.99582	2.82778	3.26847	3.45956	2.28103	4.53388	4.58532	4.35047	3.15607	3.5601	3.34361	4.28552	4.59073	6.22241	2.85956	2.73915	3.67333	Tumor	BLCA
TCGA-DK-A1AA-01A	3.9041	2.70156	2.97846	2.45598	2.79329	3.94196	4.38447	3.53124	2.5987	2.82493	2.91498	4.25007	3.39706	3.12329	3.39688	3.22825	3.05021	Tumor	BLCA
TCGA-XF-A9SY-01A	4.89889	2.51399	2.81943	2.89759	2.88792	3.88446	4.081	3.68464	1.92473	3.62429	2.53508	4.1745	3.86213	4.6368	3.44705	3.47887	3.29932	Tumor	BLCA
TCGA-DK-AA6Q-01A	4.20706	2.78014	2.54777	3.60933	2.87775	4.02454	4.44738	3.86547	2.54927	2.73177	3.14905	4.33508	3.58999	3.35657	3.37614	3.77255	3.08009	Tumor	BLCA
TCGA-G2-A2EL-01A	4.95493	2.57912	3.74715	4.1345	3.4105	4.4342	5.91366	4.68731	2.8507	2.97457	3.53876	5.01764	4.00812	4.36069	3.83868	4.28945	3.50213	Tumor	BLCA
TCGA-E7-A6ME-01A	4.66588	2.55393	3.07343	3.39947	2.18207	4.69229	4.85414	4.23102	2.89494	3.13845	4.45112	3.4156	4.1434	4.87683	3.40713	4.48488	4.14821	Tumor	BLCA
TCGA-HQ-A2OF-01A	5.41622	2.65875	2.73823	3.0819	3.0314	4.22934	5.44752	3.96166	2.6526	2.41056	3.69474	4.54543	4.12415	3.67296	3.33728	4.6195	3.57584	Tumor	BLCA
TCGA-FD-A6TF-01A	4.81742	2.92616	2.73997	3.38564	2.24579	4.46578	4.40343	3.2092	1.91062	2.6686	2.18272	3.36985	3.76333	3.56261	2.88288	3.00459	3.22782	Tumor	BLCA
TCGA-FD-A3SP-01A	4.09832	2.10233	2.60855	2.99568	2.25922	3.52845	4.02932	3.45223	2.06454	2.49782	2.55471	3.56917	3.29029	3.6586	2.66185	2.97437	2.69993	Tumor	BLCA
TCGA-BT-A20P-01A	4.00553	1.6249	2.38923	2.9979	2.13774	3.7422	3.17801	3.47028	2.54745	1.84937	2.40943	3.86503	4.13866	3.06366	3.42045	2.90931	3.04971	Tumor	BLCA
TCGA-GV-A40G-01A	5.18109	2.98387	3.01414	3.58094	2.1885	4.1632	4.4622	3.77178	2.71454	2.48712	3.31524	3.65294	3.63421	3.98802	3.0397	3.28786	2.97763	Tumor	BLCA
TCGA-CF-A47S-01A	4.72312	2.61734	2.51313	2.98359	1.98804	3.6826	3.26079	3.19447	2.36609	2.33119	2.50851	3.46076	3.80309	2.97338	3.07185	2.69481	3.20954	Tumor	BLCA
TCGA-XF-A9T2-01A	5.09325	2.65867	3.07484	2.98935	2.80238	4.04795	4.26397	3.87114	2.4984	2.01499	3.04142	3.83218	4.15598	3.31048	3.56338	3.25531	3.07951	Tumor	BLCA
TCGA-CF-A9FH-01A	4.42628	2.56439	2.92314	3.05724	2.34274	3.74017	3.91803	3.78568	3.06656	2.38294	3.08931	3.88106	3.72355	3.50219	2.89144	3.16005	3.28287	Tumor	BLCA
TCGA-ZF-AA4X-01A	4.96319	2.62788	2.61533	3.80059	2.78278	4.0644	4.31396	3.84971	3.13312	2.53274	2.83233	4.18702	3.66695	4.55032	3.49955	1.6288	3.13873	Tumor	BLCA
TCGA-XF-AAMQ-01A	4.66272	2.72107	2.56187	3.23453	2.90709	3.79444	4.61534	3.73914	2.90874	2.5446	2.98503	4.35101	3.99371	4.12236	3.48703	3.4158	3.24145	Tumor	BLCA
TCGA-CF-A3MH-01A	4.25698	2.46998	2.67348	2.81675	2.20831	3.70373	3.53153	3.53447	2.45777	2.23941	2.91336	3.7922	3.34999	3.70503	2.73197	2.82432	2.81506	Tumor	BLCA
TCGA-DK-AA6W-01A	5.83047	3.09966	3.81113	4.38847	3.28778	4.84289	4.56534	4.44082	2.95696	2.71216	3.38102	4.32728	4.28997	3.86193	3.57917	4.18497	3.71177	Tumor	BLCA
TCGA-KQ-A41O-01A	4.96904	2.99973	2.20859	2.725	1.91981	4.19703	3.46388	3.446	2.847	1.06406	2.82476	3.93972	2.8036	3.00551	3.24625	2.95296	3.19019	Tumor	BLCA
TCGA-FJ-A3Z7-01A	3.76213	2.12987	1.85882	2.25583	1.33479	3.83127	2.55343	3.36315	3.06529	2.1336	2.53757	2.64542	3.09681	1.93885	3.77142	2.36642	2.41546	Tumor	BLCA
TCGA-S5-AA26-01A	4.30268	2.54418	2.45731	3.04731	2.00616	3.38227	3.74019	3.79034	3.4336	1.98658	3.10694	3.72367	4.36805	2.79134	3.21684	2.89433	2.89778	Tumor	BLCA
TCGA-FD-A3B4-01A	3.61627	2.56397	2.94125	3.33364	2.51572	4.03432	4.4187	3.69844	2.45448	2.68371	2.98296	4.08592	3.45591	3.71935	2.89635	3.74298	2.46338	Tumor	BLCA
TCGA-GC-A3OO-01A	3.84146	2.59309	2.3802	2.711	2.57388	3.50523	4.80947	3.58152	2.41308	2.46615	2.76034	4.06097	3.43496	3.98359	3.09544	2.99781	3.43027	Tumor	BLCA
TCGA-XF-A9SP-01A	4.58591	2.35127	2.76822	3.52917	2.64328	3.91165	3.27741	3.17139	2.2298	2.38637	2.30519	3.63143	3.93664	3.58864	2.81166	2.76817	3.11791	Tumor	BLCA
TCGA-FD-A3SL-01A	3.72897	2.37345	2.69986	2.56195	2.43997	3.71508	4.00594	3.33677	2.3677	1.94315	2.60691	4.03933	2.92883	3.38646	2.24898	3.60812	2.75179	Tumor	BLCA
TCGA-FD-A6TB-01A	4.48254	2.63388	2.60073	3.72167	2.51511	3.90636	4.25777	4.62081	2.70599	2.77822	2.75271	3.1935	4.59685	2.9876	2.8577	3.42225	2.78068	Tumor	BLCA
TCGA-FD-A6TA-01A	3.95432	2.59519	3.00306	2.90288	2.38859	4.24819	4.60863	3.65542	2.61482	2.52936	2.67258	3.78837	3.86075	3.60185	2.74616	2.86078	2.89509	Tumor	BLCA
TCGA-XF-A8HB-01A	4.91089	2.5823	2.71981	4.07055	3.01176	4.29566	4.94781	3.63012	2.4012	2.87297	2.47702	4.03181	4.28644	3.98715	3.54655	0.307448	3.81241	Tumor	BLCA
TCGA-UY-A8OB-01A	4.89444	2.38352	2.62338	3.35591	2.38358	4.71376	4.01386	3.30437	1.39186	2.4249	2.11169	3.2045	4.50606	4.54606	3.05598	4.12667	3.0597	Tumor	BLCA
TCGA-GU-A767-01A	4.4122	2.46423	3.18726	3.28402	2.13944	4.33618	3.52828	3.45745	2.25881	2.76765	2.4635	3.66533	3.59974	3.82035	3.09565	2.96037	3.30311	Tumor	BLCA
TCGA-FD-A43U-01A	4.78205	2.11413	2.44179	3.24608	1.71201	3.73564	2.60196	2.92411	1.8142	2.53465	2.39147	2.85595	4.37583	3.18197	2.94727	2.23302	2.75951	Tumor	BLCA
TCGA-DK-AA6T-01A	4.62094	2.72526	3.21624	4.61312	2.41774	5.56914	4.72883	4.00446	3.1608	2.85888	3.15935	3.67115	3.9839	4.2612	3.28415	3.95761	3.19155	Tumor	BLCA
TCGA-5N-A9KI-01A	3.69346	2.17782	2.68661	2.95679	1.99125	4.26126	3.96452	2.92021	1.73355	2.66574	2.86144	3.53958	3.24248	4.23115	2.33351	2.90767	2.89457	Tumor	BLCA
TCGA-XF-A8HF-01A	4.41197	2.0236	2.32139	3.00887	1.73524	3.79208	3.71114	3.12837	2.34406	2.5395	2.0852	3.18083	3.50854	3.6364	2.74714	2.33158	3.21647	Tumor	BLCA
TCGA-UY-A78L-01A	3.61911	2.38333	3.093	2.7531	2.41655	3.82985	3.95639	3.37817	2.0074	2.35237	2.37106	3.88402	3.29026	4.18394	2.62029	2.72177	3.02815	Tumor	BLCA
TCGA-FD-A5C0-01A	4.85677	2.45514	3.62219	2.88593	2.3682	4.16499	3.50446	4.18016	2.37122	2.1606	3.16518	3.85158	3.77097	3.9751	3.37952	2.73509	3.3698	Tumor	BLCA
TCGA-UY-A9PE-01A	4.72457	2.13665	2.64462	3.15821	1.33899	4.54114	3.96468	3.49788	2.58145	2.14131	2.43009	3.30796	3.33284	3.77693	4.0858	2.09734	2.9963	Tumor	BLCA
TCGA-K4-A6FZ-01A	4.25252	2.2734	2.72861	2.94459	2.91907	3.8781	3.83244	3.48507	2.41962	2.6249	2.52474	4.13565	3.72691	3.97206	3.10877	2.48474	2.85046	Tumor	BLCA
TCGA-DK-A3IK-01A	5.32	2.16908	2.40405	2.27528	2.40314	4.26697	3.44835	3.74934	2.79758	2.14281	3.7207	3.66617	3.85403	3.67602	2.8752	1.57932	2.84652	Tumor	BLCA
TCGA-LC-A66R-01A	4.82443	2.61528	2.84505	3.08392	2.723	4.35485	4.92236	3.73709	2.31961	2.54702	2.50924	3.76578	3.35624	4.40888	3.90788	1.55701	3.00506	Tumor	BLCA
TCGA-GU-A762-01A	4.04417	2.49086	2.73034	3.05701	2.56515	4.04155	4.08581	3.42599	2.20489	3.34434	2.06095	3.37788	3.84876	3.97091	3.27114	3.37678	3.22486	Tumor	BLCA
TCGA-BT-A2LB-11A	3.1029	2.09491	2.55612	2.36251	2.19981	3.18556	3.64385	2.95748	2.53026	2.51727	3.08599	3.6069	2.90062	3.97002	2.40203	2.78265	2.09882	Normal	BLCA
TCGA-4Z-AA7O-01A	4.42515	2.42171	2.9849	2.59017	2.57533	3.55291	4.5173	3.76605	2.56903	1.89157	2.68093	3.97933	3.45913	3.51775	2.65774	3.20257	2.83796	Tumor	BLCA
TCGA-DK-A6B5-01A	3.81374	2.59957	3.06434	3.04543	3.09343	4.06712	4.41971	3.78689	3.02757	3.04248	3.10656	4.3325	3.93769	3.48342	3.56394	3.35588	2.15333	Tumor	BLCA
TCGA-C4-A0F0-01A	4.73838	1.90821	2.81661	3.35177	3.27737	4.08681	5.05566	3.70297	1.46312	3.01869	1.88503	4.26971	3.03659	4.70534	2.79887	2.98574	3.44271	Tumor	BLCA
TCGA-UY-A78N-01A	4.7625	2.17864	2.39881	3.84779	2.58271	4.14452	4.07076	4.00758	2.31051	2.05439	2.41531	4.23585	3.73153	4.59634	3.99631	2.69751	2.51086	Tumor	BLCA
TCGA-G2-AA3F-01A	4.25204	2.84819	3.14778	3.44213	2.70392	4.10479	3.97566	3.91071	3.41753	2.86105	3.32886	4.40391	3.55924	4.80486	2.91837	3.18248	3.33921	Tumor	BLCA
TCGA-ZF-AA53-01A	3.46873	1.8302	2.80849	3.31804	2.50537	3.76249	3.23508	3.00076	1.69453	2.38848	1.81539	3.8653	3.29589	3.14589	2.96466	2.35265	2.60731	Tumor	BLCA
TCGA-LT-A8JT-01A	4.84392	2.52994	2.94886	2.85528	2.56168	3.77367	4.27609	3.74233	3.04853	2.48524	2.89781	4.09385	3.59079	3.19599	3.07359	3.30964	3.15468	Tumor	BLCA
TCGA-XF-A8HI-01A	4.10937	2.71372	3.08969	3.01874	2.63089	3.79114	4.31619	4.05709	3.47228	2.54938	3.13758	4.10636	3.74777	3.28158	3.77688	3.44945	3.14879	Tumor	BLCA
TCGA-FJ-A3ZE-01A	3.89346	2.824	3.18341	2.55632	2.54385	2.77969	4.67096	3.76216	3.40686	2.49017	3.71776	4.44965	3.3659	3.39391	2.64262	2.99553	3.76658	Tumor	BLCA
TCGA-FD-A3SM-01A	3.54928	2.28728	2.93874	2.73606	2.99838	3.86094	4.10005	3.48549	2.297	2.25975	2.67921	4.06379	3.66505	3.48998	3.06278	3.27888	2.71793	Tumor	BLCA
TCGA-DK-AA6X-01A	3.98558	2.63974	3.01464	3.26869	2.87117	4.22077	4.84542	4.12901	3.2402	3.15024	3.36595	4.34854	3.06059	3.77041	3.25038	2.90959	3.75431	Tumor	BLCA
TCGA-XF-A9SJ-01A	3.60776	2.12995	2.33763	3.72083	2.39232	4.32722	3.56448	3.18311	1.58165	2.70399	2.13423	3.33443	3.74352	3.6263	2.53032	2.63778	2.789	Tumor	BLCA
TCGA-CF-A7I0-01A	4.12728	1.86876	2.32354	3.2152	2.15977	3.84379	3.87175	6.29579	2.23867	1.53326	2.68933	3.72528	3.40411	2.93956	2.9493	2.13789	2.86369	Tumor	BLCA
TCGA-GD-A3OQ-01A	4.23657	2.69411	2.69765	2.69567	2.97202	3.79678	4.18447	3.73429	2.4369	2.82105	3.12259	4.12207	3.84225	4.03629	3.45226	3.39682	3.17163	Tumor	BLCA
TCGA-CU-A0YO-01A	3.48057	2.44063	2.33034	3.03903	2.25529	3.61383	4.36301	3.44517	2.67365	2.58497	2.71927	3.81566	3.09847	3.24268	2.6547	2.93837	2.95197	Tumor	BLCA
TCGA-DK-AA71-01A	4.21533	2.49862	3.07355	3.18438	2.27736	3.98611	4.00983	4.11043	2.2834	2.60737	2.68339	3.68346	4.29018	2.71098	3.82977	3.32183	3.39289	Tumor	BLCA
TCGA-CF-A9FL-01A	4.11442	2.32382	2.53343	2.68528	2.1341	3.61184	3.87476	3.67564	2.45505	2.09884	2.72302	3.77978	3.66513	2.90628	3.49338	2.73962	2.78493	Tumor	BLCA
TCGA-ZF-AA5N-01A	5.57821	2.22497	2.75365	2.54562	2.32164	3.59108	3.49375	3.2324	1.80424	2.84823	2.47192	3.40257	3.57413	3.07331	3.34032	2.65012	3.24506	Tumor	BLCA
TCGA-UY-A9PF-01A	4.10361	2.3149	2.39027	2.72148	1.87756	3.49225	3.71797	3.33205	3.22605	2.412	2.53974	3.18747	3.2639	2.56633	3.09491	1.59565	2.76718	Tumor	BLCA
TCGA-UY-A78P-01A	3.77789	2.4278	2.8824	2.83342	2.36678	3.89666	4.16854	3.59779	1.93669	2.62622	2.3406	3.61796	3.36457	4.18178	3.4789	1.78395	2.88321	Tumor	BLCA
TCGA-CF-A1HR-01A	3.92895	2.57766	2.70362	2.96733	2.49115	4.02791	4.4772	3.49426	2.55408	2.93749	2.66057	3.78256	3.99217	4.04566	2.59524	3.33387	3.31652	Tumor	BLCA
TCGA-DK-A3IN-01A	4.77462	3.1027	2.71253	3.39471	2.99713	4.15491	4.12314	3.44731	2.25492	2.68303	2.94333	4.57297	3.55002	4.24196	3.05799	3.38329	3.22531	Tumor	BLCA
TCGA-UY-A9PH-01A	4.37219	2.18056	2.55199	3.04214	1.86479	3.73735	4.24068	3.26392	3.28545	2.71608	2.63254	3.38358	3.51579	3.66902	3.08961	2.93019	2.66788	Tumor	BLCA
TCGA-GD-A76B-01A	4.70818	2.51726	2.80055	2.70586	1.83894	3.98528	3.82553	3.5219	2.02344	2.18094	2.71152	3.33525	4.00171	4.32302	3.2772	3.01825	3.01528	Tumor	BLCA
TCGA-ZF-AA58-01A	5.38355	2.46746	3.27543	3.64833	2.61026	3.32329	3.96401	3.27975	1.65081	2.37578	2.32593	3.97382	3.3571	3.97395	3.13942	3.23421	2.7182	Tumor	BLCA
TCGA-ZF-AA4V-01A	3.81219	2.11823	2.75997	2.5862	2.31817	4.78279	3.99361	5.08817	2.09326	2.46157	2.92569	3.46495	3.78064	4.1378	3.34994	2.9482	2.53912	Tumor	BLCA
TCGA-DK-AA6R-01A	4.39154	2.51476	2.95736	3.51357	3.43702	3.91131	3.9789	3.5598	2.1736	2.72837	2.4734	4.1222	3.69231	4.47322	3.43292	2.54904	3.17317	Tumor	BLCA
TCGA-FT-A61P-01A	4.45137	2.36767	2.89261	3.37045	2.49511	3.68249	3.58459	3.47491	1.89254	2.08783	2.52213	3.33158	3.26778	3.90811	2.6341	3.09721	2.98255	Tumor	BLCA
TCGA-2F-A9KQ-01A	4.24408	1.987	2.83738	2.93952	2.61408	3.67466	4.60957	3.77619	2.66245	2.1428	2.78283	4.14105	3.23636	2.88134	3.84442	1.79122	2.84136	Tumor	BLCA
TCGA-K4-A54R-01A	4.48892	2.23783	2.44225	3.14229	2.87161	4.15783	4.84699	3.71452	1.88644	2.38187	2.04808	3.76666	4.0589	3.92298	3.47816	1.47365	2.61499	Tumor	BLCA
TCGA-FD-A62S-01A	5.188	2.66088	2.39877	3.15112	3.14633	3.93158	4.35843	3.57013	2.73505	2.54467	2.45235	4.11686	3.90328	3.33329	2.93546	3.14823	3.00934	Tumor	BLCA
TCGA-ZF-A9R3-01A	4.51484	2.33733	2.55352	3.47602	2.73786	3.7799	4.12171	3.48457	2.96415	2.45442	2.80748	4.17476	3.5341	4.3146	3.01786	3.23039	3.24613	Tumor	BLCA
TCGA-BT-A42F-01A	4.40241	2.50258	2.66551	3.54211	2.80489	4.01542	3.18828	3.33634	1.74496	2.62727	2.59579	3.48182	3.82567	3.7404	2.82497	2.67832	3.46708	Tumor	BLCA
TCGA-K4-A83P-01A	4.26574	2.32726	2.61296	2.98097	2.64133	3.85047	3.87567	3.62069	2.64587	2.26354	2.93633	4.30553	3.56006	3.75895	2.7332	3.56195	2.82725	Tumor	BLCA
TCGA-K4-A5RJ-01A	3.57763	2.74291	2.43355	3.6723	2.8446	4.08569	4.14639	3.68248	2.75497	3.04146	2.62288	4.09511	4.76164	3.53583	3.80617	3.21619	3.25957	Tumor	BLCA
TCGA-XF-A9SX-01A	4.73	2.44855	2.41014	3.48246	2.15925	3.88167	3.07321	2.95475	1.64064	2.77258	2.28939	3.22944	4.15543	3.26119	2.81853	3.21112	3.23443	Tumor	BLCA
TCGA-KQ-A41N-01A	5.14248	1.75021	2.04394	3.14735	2.23951	3.69221	3.11015	3.01494	2.7357	2.42118	2.61785	3.16012	3.52934	2.4614	3.06612	2.38349	2.78489	Tumor	BLCA
TCGA-DK-A1AE-01A	4.51915	2.68623	3.07909	3.23563	3.26668	4.17837	4.70962	4.34973	2.53879	2.19507	3.17153	4.6293	3.54675	3.72647	3.78532	3.86692	3.24808	Tumor	BLCA
TCGA-DK-A3WX-01A	4.44182	2.60211	2.74964	3.46792	3.24577	2.77243	4.30797	3.80662	2.63779	3.4153	2.63242	4.28393	3.85229	4.55676	3.1653	3.00323	3.68354	Tumor	BLCA
TCGA-DK-A3WW-01A	3.75058	2.27165	3.01027	2.9598	2.58875	3.66679	3.84298	3.53379	1.87542	2.15476	2.39377	4.12862	3.64387	3.32921	3.38106	2.84233	2.391	Tumor	BLCA
TCGA-XF-A9SK-01A	4.7083	2.6694	2.19816	3.30977	2.36549	4.20568	3.81395	3.23066	2.70439	2.584	2.87405	3.67188	4.51081	3.35259	3.22656	2.97251	3.54496	Tumor	BLCA
TCGA-KQ-A41R-01A	4.99553	2.32898	2.04369	4.64425	1.69186	4.31373	2.6604	2.88996	2.42218	1.64289	2.72947	2.99998	3.71014	3.58943	3.0079	2.37166	2.2136	Tumor	BLCA
TCGA-CF-A3MG-01A	4.02226	2.59547	2.83133	3.15111	2.40109	4.18613	4.14821	3.54158	2.32794	2.16558	2.86654	4.18795	3.39225	4.32708	2.5725	3.28846	3.34358	Tumor	BLCA
TCGA-CU-A0YR-01A	3.9613	2.51292	2.83783	2.31348	2.52457	4.18682	4.45733	3.85383	2.62929	2.59856	2.87438	4.08196	3.206	3.78718	2.45674	2.7962	3.28493	Tumor	BLCA
TCGA-UY-A78M-01A	4.91884	2.31607	2.27951	4.05674	1.6735	4.07582	3.97783	3.26189	2.80269	2.53897	2.50618	2.73636	3.26109	3.60791	3.34768	3.14605	3.89815	Tumor	BLCA
TCGA-CF-A5UA-01A	5.20193	2.49291	2.98145	2.9097	1.70139	3.82588	3.61658	4.55976	2.12534	1.87355	2.285	3.66941	4.08467	4.15334	2.78744	2.9701	2.89602	Tumor	BLCA
TCGA-ZF-A9RN-01A	4.55306	2.36942	3.0281	3.70793	2.46361	5.10729	4.31511	4.03338	2.04934	1.63799	2.69239	4.21036	4.30732	3.19831	3.71818	3.17161	3.27532	Tumor	BLCA
TCGA-4Z-AA81-01A	4.40527	2.15622	2.68039	3.51334	2.28358	4.15567	3.61842	3.50781	2.24933	2.36015	2.35541	3.32555	3.96703	3.76867	2.71561	3.14569	2.97777	Tumor	BLCA
TCGA-E7-A8O8-01A	4.21412	2.11381	1.93086	2.7013	1.83417	3.56903	3.13129	3.08354	2.15394	2.01301	2.17379	3.43733	3.82045	3.14971	3.22487	2.71957	2.62809	Tumor	BLCA
TCGA-BL-A0C8-01B	3.31998	4.88747	2.99587	3.76893	2.54619	3.59904	4.51063	5.30664	4.53233	1.69634	3.7322	4.6867	3.197	3.40478	3.2976	2.97684	3.25495	Tumor	BLCA
TCGA-GC-A3RB-01A	4.29659	3.19559	3.60023	3.87055	2.48538	4.34033	4.67656	3.99156	2.77779	2.75242	3.19898	3.86699	3.67461	4.58019	3.39432	3.09849	3.5634	Tumor	BLCA
TCGA-BT-A20O-01A	3.99105	2.44017	3.03441	3.0715	3.15956	4.18101	4.39137	3.9236	1.94146	2.70276	2.60841	4.31639	4.61429	3.54399	3.40971	3.6759	2.60934	Tumor	BLCA
TCGA-G2-A2ES-01A	4.1385	2.30455	2.85607	2.86676	2.78234	3.85223	4.36702	3.47352	1.7662	2.6448	2.58848	4.25056	3.58853	4.2246	3.13967	3.03764	3.007	Tumor	BLCA
TCGA-DK-AA6P-01A	4.96656	2.64628	2.89052	3.54003	2.46705	3.60262	3.72399	5.36338	2.85201	3.07311	3.96186	4.42123	3.27201	3.47052	3.21763	3.27857	3.59607	Tumor	BLCA
TCGA-FD-A43P-01A	4.40988	2.6381	2.45151	3.72662	2.79242	4.84212	4.39142	4.29547	2.88065	3.60391	3.18727	4.09118	4.518	4.8342	4.06018	3.59282	3.16458	Tumor	BLCA
TCGA-2F-A9KT-01A	4.18269	2.74558	2.65145	3.07718	2.08323	3.62315	4.57614	3.95009	2.23876	2.30069	3.30799	3.51878	3.52793	3.86357	3.26204	3.09229	2.68411	Tumor	BLCA
TCGA-CF-A9FF-01A	5.56647	2.55745	2.03536	2.89139	1.93265	3.54134	3.29158	3.10948	2.67614	1.79991	2.46931	3.624	3.3687	3.03674	2.6094	1.82092	2.34646	Tumor	BLCA
TCGA-UY-A9PA-01A	4.11303	2.39284	2.91394	2.53126	2.65676	3.74283	3.96427	3.48198	2.58817	1.9441	2.67913	4.03553	3.81766	3.78202	3.0837	2.54183	2.49602	Tumor	BLCA
TCGA-E7-A7DU-01A	4.32349	2.40549	2.97631	3.01284	1.76622	3.57802	3.5027	3.33735	2.43341	1.98016	2.53576	3.47675	4.10633	3.13869	3.18753	2.75187	2.69356	Tumor	BLCA
TCGA-2F-A9KW-01A	4.90774	2.65295	3.43533	3.46368	2.88978	4.08658	4.50441	4.17894	2.97052	2.95535	3.25158	4.9316	3.88267	3.52976	4.3247	2.16624	2.93653	Tumor	BLCA
TCGA-4Z-AA87-01A	4.93597	2.14556	3.234	4.18829	2.61951	4.40943	4.59917	4.21213	2.33037	3.19075	2.88039	4.55182	3.36833	3.79721	3.41519	2.69662	3.23198	Tumor	BLCA
TCGA-GU-A42Q-01A	4.59593	2.40359	2.70044	3.04986	2.51063	4.13336	4.38034	3.68637	1.44491	2.17436	2.33153	3.98533	4.03497	2.95952	3.10188	3.36605	3.27751	Tumor	BLCA
TCGA-E7-A97P-01A	4.18927	2.28795	2.77021	2.68832	2.87835	4.03754	4.35798	3.64026	1.9538	2.36931	2.45324	3.84867	3.53778	3.69328	3.06148	3.6146	2.88568	Tumor	BLCA
TCGA-XF-AAMG-01A	4.6881	2.85578	3.07356	4.23364	2.37438	5.02739	4.04384	4.19352	2.98264	2.68088	3.47532	3.84207	4.13514	4.00098	4.57063	3.4128	2.76507	Tumor	BLCA
TCGA-BT-A3PH-01A	4.15952	2.77363	2.70172	2.36804	2.81569	3.84199	4.16061	3.35401	2.01628	2.40963	2.57686	4.26894	3.11147	3.99168	2.73224	1.11109	2.35814	Tumor	BLCA
TCGA-ZF-AA4R-01A	4.29469	2.63439	3.10933	3.25738	3.00282	4.78349	4.71363	4.30362	2.59328	2.11523	3.18897	4.44215	3.68335	4.22622	3.29295	3.83561	2.9974	Tumor	BLCA
TCGA-ZF-AA5P-01A	3.76173	2.39007	2.49639	3.05226	2.42111	3.94691	3.61017	3.21986	2.66308	2.59013	3.07601	3.6066	3.36225	3.09429	3.18827	3.94142	2.42772	Tumor	BLCA
TCGA-DK-A3X2-01A	4.92639	2.57595	3.76053	3.85646	2.6923	4.39292	4.48031	4.07475	2.96087	2.64307	2.7356	4.07728	3.43093	4.37456	3.47888	1.97763	3.26351	Tumor	BLCA
TCGA-YC-A8S6-01A	3.78855	2.407	2.76838	2.82381	2.11029	3.36749	3.62831	3.5468	2.68381	2.54412	2.85461	3.87973	3.6058	3.08455	3.03643	3.11721	2.76812	Tumor	BLCA
TCGA-K4-A4AB-01B	4.21763	2.50306	2.62012	2.68091	2.61531	3.76374	4.56799	3.43194	2.81156	2.31086	2.86906	3.95747	3.74386	3.52586	3.35522	3.19636	2.63581	Tumor	BLCA
TCGA-GC-A3RC-01A	4.0713	2.57524	2.7529	3.64737	3.15002	3.35861	3.80509	3.33024	2.16418	3.51197	2.45883	3.98397	3.99146	4.17657	3.26104	2.29787	3.25975	Tumor	BLCA
TCGA-BL-A0C8-01A	3.50475	3.65453	2.91927	3.60863	2.42796	3.87241	4.18272	4.03988	3.6024	2.44254	3.07079	3.94311	2.86729	3.99222	2.75156	2.91539	3.17833	Tumor	BLCA
TCGA-GU-AATP-01A	5.08748	2.54551	2.29213	4.39689	1.76096	3.904	3.49163	3.14318	2.52174	2.38012	2.23766	3.05206	3.99313	3.19405	3.02592	1.43584	3.02355	Tumor	BLCA
TCGA-CF-A1HS-01A	4.35788	2.42578	3.06452	3.38055	2.45631	4.6483	4.24322	3.72991	1.93205	2.1536	2.61121	3.5922	3.41108	3.95918	2.70517	3.48074	3.04371	Tumor	BLCA
TCGA-ZF-AA4U-01A	4.96646	2.45432	2.77619	2.93539	2.67271	4.26863	3.47317	4.85559	2.48791	2.16173	2.42096	4.15108	3.19673	3.11837	3.15412	2.22075	3.79031	Tumor	BLCA
TCGA-GV-A3QF-01A	3.57122	2.93843	3.07667	3.12033	2.03301	4.28608	3.80286	3.56301	2.8749	2.80591	2.97275	3.57721	4.30796	4.05328	2.72496	2.24742	3.22325	Tumor	BLCA
TCGA-GC-A4ZW-01A	4.73654	2.9432	3.22402	3.10169	2.75081	4.40496	4.58232	3.99799	2.37115	3.30911	2.90034	4.30051	3.50436	4.18084	3.52861	3.70354	3.60296	Tumor	BLCA
TCGA-ZF-A9RD-01A	3.53293	2.50917	2.25701	3.25337	3.06492	4.24281	4.52708	3.31348	1.78731	3.07732	2.65731	4.02552	3.32178	4.117	4.24977	2.98742	3.18259	Tumor	BLCA
TCGA-GU-A766-01A	4.55352	2.33955	2.76075	2.96239	2.52861	3.99765	3.70694	3.28571	2.06054	3.44022	2.3783	3.47793	3.96777	4.04978	3.35036	2.9423	3.32617	Tumor	BLCA
TCGA-G2-A2EF-01A	4.40303	2.7903	3.08023	3.61359	2.6411	3.84896	4.79383	4.11448	2.32912	3.16026	3.25734	3.83303	4.62288	4.17096	3.42794	3.87116	3.68166	Tumor	BLCA
TCGA-FD-A5BY-01A	4.76276	2.89266	2.94664	3.61409	3.5113	4.32433	4.98253	4.03416	2.02059	2.76918	3.21024	4.74134	4.4917	4.29669	3.98813	2.79587	3.16694	Tumor	BLCA
TCGA-CF-A8HX-01A	4.06432	2.53975	1.80202	2.70861	1.76844	3.51954	2.69127	2.78577	2.94277	1.28971	3.10448	3.37117	4.18713	2.8272	3.57993	1.90948	2.86711	Tumor	BLCA
TCGA-GV-A6ZA-01A	4.42194	2.735	3.2582	3.71428	2.35641	4.4505	4.53448	3.87871	2.90164	2.57896	2.61752	4.12989	3.98112	3.68226	3.3961	2.64758	2.74661	Tumor	BLCA
TCGA-DK-A1A5-01A	4.02404	2.45038	3.67752	2.26275	2.48422	4.38952	4.78913	3.89871	1.98383	2.01586	3.08693	3.84712	3.47019	4.26408	3.00998	2.89476	2.75572	Tumor	BLCA
TCGA-4Z-AA7N-01A	4.17239	2.28186	2.56779	2.72624	2.26128	3.09752	3.91974	3.53362	3.0094	2.5574	3.13368	3.8367	3.65668	2.73874	2.43047	3.48091	2.87905	Tumor	BLCA
TCGA-GC-A3RD-01A	4.974	2.35753	3.33999	3.24384	2.28629	4.32624	3.78449	5.71738	3.24976	3.03903	3.03529	3.62675	3.65689	4.0751	3.07645	3.09012	3.54115	Tumor	BLCA
TCGA-G2-A3IE-01A	5.04949	2.47531	2.65878	3.16468	1.90233	3.61979	3.60799	3.45124	2.93119	2.23023	2.93982	3.75645	4.27931	3.47995	3.49999	2.3154	3.07384	Tumor	BLCA
TCGA-FD-A5BZ-01A	4.8413	2.18992	2.9263	3.17035	1.95091	3.70448	3.7044	4.41007	2.32829	2.47137	2.35669	3.71994	4.2718	2.77165	2.61054	3.05173	3.49351	Tumor	BLCA
TCGA-BT-A3PJ-01A	3.84258	2.50959	2.78622	3.15803	3.127	4.28771	5.01118	3.65702	2.31949	3.30181	2.40583	4.03621	3.93524	5.13102	3.33133	4.04828	2.70649	Tumor	BLCA
TCGA-CU-A72E-01A	3.87738	2.416	2.41359	3.00287	2.54149	3.92813	3.88988	3.27701	2.34317	2.34379	2.30395	3.70807	3.52433	3.67452	2.82229	2.74252	2.68615	Tumor	BLCA
TCGA-ZF-A9RM-01A	4.63855	2.79116	3.1555	3.27228	2.6617	5.55482	5.15078	3.96572	3.28158	2.80826	3.4858	4.1571	3.83355	3.89145	2.85709	3.92132	3.68502	Tumor	BLCA
TCGA-FD-A6TH-01A	5.14522	2.32382	2.54985	4.33262	1.98418	4.35513	4.20109	3.49287	2.3814	2.43017	2.16713	3.4298	4.47342	3.62362	2.92741	1.60757	2.84578	Tumor	BLCA
TCGA-GD-A3OS-01A	5.70604	3.04936	2.63402	3.84338	2.7101	4.25944	4.72242	3.9734	2.23707	2.75675	2.95546	4.0641	4.41693	4.21267	3.06329	3.2039	3.27358	Tumor	BLCA
TCGA-DK-A3IS-01A	4.12009	2.50248	2.99538	3.06951	2.65069	3.8036	4.69513	3.84808	2.36784	2.58247	3.00268	4.24646	3.32647	3.55971	3.16194	3.62004	3.64744	Tumor	BLCA
TCGA-K4-A3WS-01A	4.65419	2.53159	2.61806	2.7753	2.72563	3.53474	4.36746	3.82875	3.14329	2.24441	3.12485	4.08995	4.11358	3.91729	3.41752	3.09115	2.87828	Tumor	BLCA
TCGA-GD-A2C5-11A	4.14915	2.3392	2.6802	2.43004	2.50832	3.6901	4.61615	3.39602	2.74662	2.72499	2.88444	3.96841	3.3889	3.25474	2.8235	2.99204	3.32037	Normal	BLCA
TCGA-4Z-AA7R-01A	4.01293	2.98455	3.21621	3.73499	2.89073	4.90459	4.2483	3.97102	2.75384	2.3914	2.61617	4.30336	3.60408	4.48528	3.53234	2.86663	2.8659	Tumor	BLCA
TCGA-DK-A6B1-01A	4.30002	2.32772	3.34424	3.58722	2.21473	4.24341	3.97916	3.92779	2.51087	2.30248	2.91488	3.92439	3.74482	4.28917	3.5046	3.27406	3.32832	Tumor	BLCA
TCGA-GV-A3QI-01A	4.21335	2.77374	3.06758	3.85533	3.10611	4.61258	4.36253	4.2459	3.07659	3.09182	3.47785	3.48491	2.90087	3.97715	4.34662	3.86351	4.27264	Tumor	BLCA
TCGA-DK-A6AW-01A	4.21912	2.44483	2.16355	2.25752	1.5397	3.3084	3.07841	2.87875	2.40171	1.39101	2.80161	3.55266	3.67747	2.2215	2.93073	2.05405	2.22329	Tumor	BLCA
TCGA-BT-A20W-01A	4.67348	2.75252	2.95241	2.86875	2.46164	4.47817	4.44861	3.95009	2.53233	2.40499	3.24276	4.10478	3.58063	3.91329	3.01277	3.0154	3.00724	Tumor	BLCA
TCGA-DK-A3IU-01A	4.54654	2.24565	2.62148	3.1277	2.34928	3.81833	4.06631	3.31212	2.21963	2.77664	2.66289	3.58082	3.38724	2.75972	2.62184	3.26174	2.96851	Tumor	BLCA
TCGA-K4-A5RI-11A	4.17774	2.51818	2.46576	2.92839	2.08345	3.11518	3.81887	3.16999	2.60279	2.61764	2.80091	3.47305	3.34896	2.78884	2.7381	3.62523	2.8568	Normal	BLCA
TCGA-GC-A3YS-01A	4.09211	2.62745	2.87546	4.19192	2.97684	3.99357	4.64353	3.84357	2.27657	2.22884	2.89627	4.47461	3.74196	3.74735	3.11949	3.19362	3.01262	Tumor	BLCA
TCGA-4Z-AA7Q-01A	4.13594	2.58195	2.88337	3.90123	2.20112	4.11044	3.56578	3.62481	2.22638	2.52456	2.48955	3.57991	4.16866	3.53874	2.87344	2.6023	2.79337	Tumor	BLCA
TCGA-LT-A5Z6-01A	4.51752	2.12861	2.82054	4.16219	2.4494	3.90213	3.87074	4.24664	3.53266	3.17672	2.62202	3.93712	3.45703	3.88246	3.37279	3.16811	3.56108	Tumor	BLCA
TCGA-GC-A3I6-01A	4.54817	2.58923	2.72277	2.64849	3.07828	3.83192	4.9493	3.53783	2.85193	2.79482	3.23919	4.08225	3.43025	4.52177	3.20832	3.4204	3.58955	Tumor	BLCA
TCGA-E7-A5KF-01A	3.941	2.70389	3.03405	3.26794	2.30456	3.91116	4.44704	3.88009	4.04317	2.69286	3.05413	4.20481	3.61062	3.42531	3.40715	3.72335	3.40291	Tumor	BLCA
TCGA-DK-A3IM-01A	3.27691	2.94724	3.55498	2.70542	3.09864	4.70769	4.50715	3.97545	2.44267	3.0271	3.44967	4.46408	3.38046	4.32323	3.36188	4.13686	3.50251	Tumor	BLCA
TCGA-CF-A47X-01A	5.27554	2.42588	3.09723	2.45956	2.36901	3.98966	3.95785	4.06143	3.03099	2.14119	3.2795	4.18243	3.54589	3.54451	3.5436	3.46591	3.10616	Tumor	BLCA
TCGA-BT-A2LA-01A	5.27078	3.00117	3.16802	3.9891	2.68372	4.99131	5.49509	4.31185	2.1315	3.72027	3.68368	4.19509	3.8628	4.76817	3.91946	3.85936	2.95347	Tumor	BLCA
TCGA-GV-A3QK-01B	4.02188	1.6381	2.6678	3.25138	2.32576	4.03447	3.99731	3.97152	2.31628	2.20396	2.79223	4.30102	3.4198	3.12189	3.35916	3.01176	2.74588	Tumor	BLCA
TCGA-FD-A6TD-01A	4.92529	2.81549	2.92429	3.71096	2.68516	3.75456	3.42023	3.57449	2.00358	2.58629	2.5748	3.95372	3.27834	4.83331	3.20457	2.96654	3.0125	Tumor	BLCA
TCGA-XF-AAMX-01A	4.25291	1.86429	3.08555	3.22935	1.74772	4.2087	4.07108	4.12308	2.96932	2.14963	3.38679	3.13748	4.04936	3.99188	2.46217	3.05231	3.82792	Tumor	BLCA
TCGA-ZF-A9R5-01A	5.104	2.8804	2.71316	3.12635	2.68577	3.82892	4.32215	3.99106	3.56263	2.95451	3.25314	4.20432	3.99881	3.37607	3.51346	4.31225	3.42812	Tumor	BLCA
TCGA-XF-A8HC-01A	4.14236	2.40346	2.42001	3.80184	2.16128	3.77991	3.88692	3.66693	2.82089	2.12681	2.48752	3.57527	3.96306	4.49839	3.504	0.624278	2.99221	Tumor	BLCA
TCGA-ZF-A9RF-01A	5.11963	2.86108	3.01263	2.80753	2.96165	4.37551	3.92876	3.50092	2.14896	3.06744	3.74546	3.71354	3.65776	4.23447	3.40436	3.39531	2.92545	Tumor	BLCA
TCGA-H4-A2HO-01A	3.28744	2.24486	2.41996	2.80419	2.17562	3.50712	3.46772	3.72013	2.55926	1.98444	2.50774	3.77003	4.40521	2.90904	2.65449	2.51545	2.78593	Tumor	BLCA
TCGA-BT-A42E-01A	4.22408	2.42871	2.84401	3.20069	2.74729	3.7819	3.64136	3.67702	3.10323	2.18029	2.23226	4.15342	4.11177	3.30407	3.05663	3.19101	2.62975	Tumor	BLCA
TCGA-FD-A5BU-01A	3.85627	2.65432	2.29844	3.00375	2.58346	3.5881	3.74143	3.58183	2.00118	2.73957	2.43335	3.67611	3.93849	3.3413	2.99467	3.4763	2.8659	Tumor	BLCA
TCGA-XF-A9T6-01A	5.36961	2.65116	3.1202	3.62684	2.46804	4.63129	4.39544	3.60638	2.15219	2.80646	2.36759	3.40091	3.11322	4.17681	3.22936	3.19516	3.74684	Tumor	BLCA
TCGA-ZF-AA4T-01A	5.07841	2.52593	3.17699	3.96951	2.6211	4.76455	3.84302	3.81233	2.27175	3.14099	2.85505	3.74164	4.31602	4.77808	4.34893	2.52762	3.22746	Tumor	BLCA
TCGA-FD-A3B6-01A	4.61873	3.55646	3.04178	3.72293	2.09631	4.33569	4.72586	3.80095	1.94266	3.80523	2.2044	3.55576	3.99648	4.79932	3.323	3.54377	3.41661	Tumor	BLCA
TCGA-4Z-AA80-01A	4.57186	2.75686	3.09737	3.93327	3.13759	4.64785	4.60698	4.35522	3.13396	3.34404	3.42109	4.18999	3.49442	4.00115	3.22416	4.26593	3.44761	Tumor	BLCA
TCGA-GC-A6I3-11A	4.42084	2.62213	2.17026	3.82822	1.87696	4.4398	3.55856	3.07126	2.06152	3.10103	2.5351	3.1246	4.53151	3.37051	2.79773	2.76307	2.92119	Normal	BLCA
TCGA-XF-A9SW-01A	3.67866	2.29661	2.48053	2.75865	2.27719	3.67994	3.4387	3.45149	2.04807	2.14233	2.43105	3.78079	2.77466	2.44358	2.45942	3.39571	2.65021	Tumor	BLCA
TCGA-E7-A5KE-01A	4.66127	2.69488	2.95234	3.54832	2.57976	3.98683	3.96526	4.69109	3.43608	2.75355	3.01273	4.12394	3.96203	4.23375	4.07966	3.43417	3.39046	Tumor	BLCA
TCGA-DK-AA6S-01A	4.12842	2.46634	2.06302	2.78923	2.07669	4.01773	4.15194	3.97996	2.41244	2.91956	3.30312	3.37509	3.50006	3.56654	2.94873	3.01179	3.45	Tumor	BLCA
TCGA-FD-A5BR-01A	5.28911	2.34861	2.75846	3.3475	2.29648	3.70419	4.08183	3.37206	3.21451	2.9947	2.70362	3.78652	3.58336	3.43488	2.94275	3.17246	3.07314	Tumor	BLCA
TCGA-FD-A6TC-01A	4.32827	2.64521	3.0208	3.62411	2.51822	4.51646	4.03976	3.97535	1.92731	2.05849	2.76712	4.02492	3.3638	3.74819	3.05354	3.51885	3.1093	Tumor	BLCA
TCGA-XF-AAN1-01A	4.91209	2.62211	2.62405	3.04925	2.54238	4.1709	4.03138	3.68889	2.78434	2.9401	2.69111	3.91747	3.63279	3.07095	3.34701	3.40509	3.8559	Tumor	BLCA
TCGA-DK-A3IV-01A	4.91967	2.40072	3.2305	3.3333	3.06487	3.48556	4.10416	4.10385	3.26114	3.08747	4.2321	4.44522	4.03372	5.23385	3.26207	3.25587	3.26013	Tumor	BLCA
TCGA-PQ-A6FN-01A	5.51409	2.66668	2.21812	4.38375	2.9142	4.39401	4.52406	3.2373	1.72094	2.86857	1.75528	3.79038	3.9825	4.05856	3.42837	2.52773	3.33891	Tumor	BLCA
TCGA-K4-A5RI-01A	4.49562	2.81239	2.74846	3.43601	2.74509	4.0851	4.0134	3.96623	1.97388	2.0812	2.67551	4.26639	3.74475	4.32832	3.32937	3.00718	3.18008	Tumor	BLCA
TCGA-ZF-A9R7-01A	5.21628	2.76979	2.56001	3.15641	1.99611	3.47366	3.64044	3.50339	4.12191	2.03928	3.57106	3.52844	4.22057	3.19422	3.80383	2.77266	3.18914	Tumor	BLCA
TCGA-XF-A9SM-01A	4.59941	1.8607	3.15684	2.96052	2.97033	4.74783	4.51016	3.57605	1.98943	2.96461	2.98068	3.9948	3.21695	4.3738	3.12746	3.45742	3.34235	Tumor	BLCA
TCGA-BL-A13J-11A	3.23897	2.42769	2.09858	2.0157	2.34084	2.90209	3.82088	2.88957	2.5818	2.06412	2.8379	3.66143	2.83221	2.04231	1.88808	3.46421	2.26105	Normal	BLCA
TCGA-FD-A6TE-01A	4.99184	2.29304	3.2633	2.84239	3.05305	4.34442	4.09138	3.93029	2.92557	2.28091	2.72976	4.1281	3.56609	3.96933	3.23039	2.67977	3.89867	Tumor	BLCA
TCGA-XF-AAME-01A	4.01573	2.40344	2.78222	3.09387	2.54886	3.60676	3.93743	3.39855	2.79279	2.70358	2.72799	3.70657	3.4333	3.33042	3.00022	3.42542	3.15139	Tumor	BLCA
TCGA-BT-A42C-01A	4.34353	2.73701	3.2086	3.5396	2.7435	4.41124	4.64818	5.32115	2.35468	3.16953	3.55837	4.28639	3.54556	3.43792	3.10721	3.69657	3.77118	Tumor	BLCA
TCGA-CF-A47Y-01A	4.78959	2.26961	1.93073	2.20087	1.87959	3.20913	3.01112	2.86369	2.96406	1.34692	2.53113	3.42517	3.53547	1.99948	3.28199	2.44583	2.40872	Tumor	BLCA
TCGA-E7-A519-01A	4.74633	2.17483	0.894374	3.05493	1.92115	3.88267	2.31662	1.78647	1.70679	1.52917	1.56105	2.54969	4.64964	1.79364	2.25486	1.44983	2.39449	Tumor	BLCA
TCGA-FD-A43Y-01A	3.96119	2.48569	2.72229	3.1756	2.51283	3.74614	4.33984	3.50149	1.99033	2.83716	2.46935	3.64676	4.29522	3.28369	2.864	3.10843	3.07705	Tumor	BLCA
TCGA-BL-A5ZZ-01A	4.4881	2.43258	2.37459	2.97265	2.88438	4.10591	3.99932	3.37581	2.03971	2.4602	2.55814	4.19431	3.53476	3.51268	2.68492	3.09874	2.71663	Tumor	BLCA
TCGA-CF-A3MF-01A	3.88591	1.53339	0.963286	1.8818	0.986216	2.02845	1.38709	1.70651	1.9778	0.695209	2.94368	2.59023	3.46184	1.51505	2.02748	1.07795	1.71307	Tumor	BLCA
TCGA-FD-A3B8-01A	3.58824	2.55544	2.59971	2.58616	2.76965	3.61754	3.8264	3.39131	2.25652	2.56528	2.87279	4.15161	3.49964	3.44665	2.7214	3.62173	2.22057	Tumor	BLCA
TCGA-BL-A13I-01B	3.34099	3.22427	3.04588	2.90234	3.63205	3.69654	4.87899	4.5452	3.53495	2.24289	3.63369	5.1277	3.87408	2.96558	3.64617	4.4148	3.03214	Tumor	BLCA
TCGA-DK-A1A7-01A	2.95951	1.65022	2.05837	2.13919	2.02385	3.89151	3.65018	3.86043	1.84252	1.62702	2.33059	3.58107	3.20122	2.0672	2.81709	2.69873	3.05936	Tumor	BLCA
TCGA-DK-A1A6-01A	3.94672	2.63991	3.07841	3.1005	2.76141	4.39108	4.84155	4.0786	2.8496	2.06647	2.82076	4.40775	3.48714	4.29152	2.80231	3.59729	3.47035	Tumor	BLCA
TCGA-DK-A6B2-01A	5.231	2.42746	2.56646	2.91652	2.37637	4.23855	4.60114	4.53968	2.35159	2.07906	2.99117	4.02206	3.71467	3.97473	2.88732	2.83588	2.7308	Tumor	BLCA
TCGA-DK-AA74-01A	4.25872	2.08553	2.15406	3.13445	2.43696	3.43578	3.43491	2.64048	1.31365	2.19032	1.84725	3.54059	3.93505	3.43222	2.23188	2.49655	3.11785	Tumor	BLCA
TCGA-ZF-AA4N-01A	4.49056	2.50769	2.80632	4.27779	2.29531	3.65468	3.81028	3.43698	2.62148	2.43097	2.70333	3.73793	3.40239	3.88932	3.55743	3.15698	2.67834	Tumor	BLCA
TCGA-BT-A0YX-01A	3.99014	2.24191	2.71004	2.47332	2.75283	4.17711	3.76231	3.28964	1.80758	2.16208	2.41118	4.158	3.2157	4.18834	3.16168	3.17701	2.74998	Tumor	BLCA
TCGA-R3-A69X-01A	3.95794	2.64343	2.87815	2.96466	2.60731	3.88617	5.11038	3.52005	2.90197	3.13554	2.87524	3.87664	3.90268	3.12077	3.0712	2.78177	3.00275	Tumor	BLCA
TCGA-XF-AAMW-01A	4.65573	2.49379	2.70133	2.74174	2.22729	3.98449	4.06411	3.52421	2.06226	1.8819	2.49933	3.68367	3.80423	3.89052	2.93256	3.27207	2.52625	Tumor	BLCA
TCGA-C4-A0EZ-01A	5.13231	2.77859	3.23677	4.48627	3.00226	5.11531	5.48337	4.55753	2.66304	2.19788	3.3805	4.38588	4.47039	3.85672	4.64522	0.621918	3.79711	Tumor	BLCA
TCGA-E7-A678-01A	4.17151	2.54266	2.38882	3.13717	2.04494	3.73204	3.5486	3.10212	2.50364	2.63009	2.40252	3.55118	3.79182	2.67601	3.41918	2.96007	3.26959	Tumor	BLCA
TCGA-G2-A3IB-01A	3.66624	2.50407	2.97772	2.84507	2.70618	3.90327	4.01768	3.48307	1.88058	2.63214	3.07449	4.09763	3.45784	4.63595	2.92149	2.90804	2.59699	Tumor	BLCA
TCGA-BL-A13J-01B	4.06554	3.14654	2.69677	3.12806	3.37634	4.02444	5.72607	5.55801	3.95854	2.05423	4.29418	4.83658	3.6984	2.73466	3.32254	2.40615	3.2324	Tumor	BLCA
TCGA-DK-A3IT-01A	5.18927	2.57051	2.50524	3.43258	3.26565	4.39234	4.58366	3.68146	2.89701	2.58033	2.98319	4.46073	2.99623	4.1392	2.59951	2.2573	2.89667	Tumor	BLCA
TCGA-MV-A51V-01A	4.73786	1.97582	2.06313	3.35108	2.17308	3.96641	3.12673	3.29181	2.39867	2.05617	2.53162	3.52	4.49284	3.28709	3.10034	2.47948	2.80539	Tumor	BLCA
TCGA-UY-A78O-01A	4.28682	2.2922	2.57833	3.08856	2.31268	3.35989	3.72349	3.23223	2.53602	1.78561	2.44734	3.79093	3.72062	2.95746	3.33424	2.47128	3.29542	Tumor	BLCA
TCGA-FD-A6TK-01A	5.07171	2.48155	2.50334	2.79473	2.55413	3.73815	4.10317	3.41528	2.26802	2.95545	2.90797	3.55844	4.09264	4.1983	3.03895	3.16297	3.00499	Tumor	BLCA
TCGA-4Z-AA83-01A	5.0332	2.45311	2.54632	2.96954	2.31467	3.45885	3.33146	3.50667	2.76833	2.1987	2.77482	3.68162	3.49376	2.64697	2.89441	2.83725	3.39756	Tumor	BLCA
TCGA-DK-A2I6-01A	3.8696	2.52671	2.51845	3.31956	2.17892	4.57181	3.40764	3.49992	2.06994	2.97956	2.89188	2.99329	3.88616	3.62388	2.70359	2.19134	2.7806	Tumor	BLCA
TCGA-XF-AAN4-01A	3.71188	2.43909	2.41957	2.50373	2.57185	3.46234	3.75497	3.35171	2.6936	2.45968	2.94416	3.81881	2.91939	2.8067	2.71945	3.8127	2.48597	Tumor	BLCA
TCGA-GD-A3OP-11A	3.91245	2.41777	2.66659	2.67729	2.55563	3.57736	3.94613	3.22155	2.74743	2.14036	2.91045	3.87558	3.4009	3.82802	2.89807	2.97063	2.80092	Normal	BLCA
TCGA-BT-A20R-11A	3.07004	2.01229	1.96536	1.93964	1.92343	2.75802	3.77857	2.69482	3.16712	1.59106	3.52616	3.78358	2.32341	1.81454	2.07464	4.31874	1.46785	Normal	BLCA
TCGA-CF-A27C-01A	4.49633	2.68482	2.93489	2.79635	2.15372	3.77574	3.92992	4.34924	3.43938	2.38043	3.25276	4.29419	3.5249	3.27597	3.11115	3.26169	3.31335	Tumor	BLCA
TCGA-5N-A9KM-01A	3.29679	2.75975	2.80617	3.1595	2.51378	4.43671	4.35794	3.43811	2.44632	3.11256	2.46108	4.24934	3.94541	2.85627	2.92879	1.1067	3.69531	Tumor	BLCA
TCGA-BT-A20U-01A	4.13719	2.42663	3.01303	2.78616	2.96882	3.80976	4.67891	4.01423	2.24008	2.21619	2.83397	4.37482	3.37037	4.2092	3.12662	2.95809	3.07665	Tumor	BLCA
TCGA-YC-A9TC-01A	4.52957	2.97392	2.742	3.71906	2.48819	4.1168	4.04938	3.94097	2.12016	2.36306	2.59426	3.84177	3.97375	3.28537	4.24828	3.18969	3.33234	Tumor	BLCA
TCGA-E7-A6MD-01A	4.66234	2.67624	3.20722	2.49518	2.36921	3.49184	4.32559	3.81289	3.89145	2.55239	2.82595	4.15015	3.83066	3.79117	2.77344	3.73421	2.30076	Tumor	BLCA
TCGA-K4-A5RH-01A	4.79061	2.73361	2.58738	2.96087	2.23747	3.69868	4.12996	3.4046	2.07279	2.57156	2.69514	3.59239	3.68745	3.79733	3.1386	3.27128	3.24681	Tumor	BLCA
TCGA-XF-AAMH-01A	5.02409	2.49367	2.71626	3.27708	2.17805	4.11151	3.08414	3.0635	2.06792	2.8378	2.03115	3.08423	4.32312	3.21872	3.30447	3.2624	2.92139	Tumor	BLCA
TCGA-DK-A1AB-01A	3.75577	2.44992	2.93287	2.61063	2.72683	3.84847	4.41755	3.56804	2.17592	1.79815	2.92818	4.15986	3.38799	3.17369	2.60764	3.77582	2.89461	Tumor	BLCA
TCGA-E5-A4TZ-01A	5.43502	3.14289	2.81358	3.56414	3.03213	4.01442	4.48124	4.45732	3.01005	2.47761	3.35426	4.29905	4.06021	4.24714	3.29115	3.74893	3.6687	Tumor	BLCA
TCGA-FD-A43X-01A	4.46003	2.52001	2.59312	3.0078	2.31541	3.57559	3.80747	3.63929	2.61019	2.14056	2.66128	3.73002	4.33188	2.91957	3.19473	3.15653	3.41304	Tumor	BLCA
TCGA-XF-A9SU-01A	4.42856	2.26939	2.28915	3.44282	2.35653	3.9217	3.44937	3.14876	2.01582	2.45652	2.49799	3.56771	3.93876	3.09394	2.85097	2.82525	3.14044	Tumor	BLCA
TCGA-BT-A20N-01A	4.74091	2.77406	2.35899	2.4072	3.68938	4.65769	4.79979	3.95842	2.47132	2.22127	2.93981	4.53936	3.46879	4.00554	2.70595	3.86229	3.00597	Tumor	BLCA
TCGA-BT-A20J-01A	3.41652	2.66962	3.29733	3.45513	2.12905	3.98712	3.72757	4.00794	1.598	3.1802	2.614	3.62701	4.51129	3.54994	2.98327	2.51264	3.30829	Tumor	BLCA
TCGA-E7-A4IJ-01A	5.07593	2.45247	2.51396	3.62053	1.99861	4.16681	3.35706	3.92966	2.52821	2.57314	3.12509	3.64042	3.26084	3.71673	3.31367	3.2287	3.60232	Tumor	BLCA
TCGA-CF-A47W-01A	4.88875	2.55635	2.36499	2.95408	1.80302	3.73922	3.30105	2.93273	2.07471	2.42909	2.20163	3.27525	4.31596	2.73989	3.2752	2.87249	3.28413	Tumor	BLCA
TCGA-XF-A9SV-01A	4.19768	2.19105	2.83821	2.39064	2.47296	4.37094	4.36719	3.8685	2.27421	1.83633	2.88589	4.17791	3.63627	3.20599	2.84799	2.84277	3.11664	Tumor	BLCA
TCGA-K4-AAQO-01A	3.62727	2.35079	2.5522	2.69869	2.48568	3.99519	5.01353	3.67329	2.68596	1.69347	2.79393	4.06437	3.58351	2.93281	2.99883	3.1927	3.25801	Tumor	BLCA
TCGA-CU-A3YL-01A	4.78429	2.68591	2.42993	3.23581	2.00443	3.12561	3.51398	3.54793	3.30295	2.29616	3.14666	3.77408	4.18164	3.46189	3.44642	2.46173	2.45514	Tumor	BLCA
TCGA-DK-A2I2-01A	3.7233	2.53114	2.588	3.99311	2.77218	4.95041	4.15515	3.29913	1.71117	3.05608	2.70262	3.99892	3.46785	3.91838	4.07769	2.4204	3.50335	Tumor	BLCA
TCGA-4Z-AA84-01A	5.11535	2.23663	2.85712	3.56083	2.75485	4.531	2.98978	3.55027	2.39854	2.62127	3.34853	3.19311	4.26929	3.67396	3.10364	2.95391	2.88148	Tumor	BLCA
TCGA-DK-A1AF-01A	3.80552	2.42911	2.72927	2.48687	2.6505	3.54934	4.15497	3.43634	2.3761	2.50345	2.7797	4.06965	3.42007	3.36162	3.06538	3.18811	2.7542	Tumor	BLCA
TCGA-E5-A4U1-01A	6.79367	2.67339	2.75139	3.80925	1.57664	4.53408	3.89596	3.56674	2.45892	2.21457	3.5284	3.00748	4.55868	2.75317	3.59805	2.83887	3.77093	Tumor	BLCA
TCGA-BT-A20Q-01A	3.928	2.49899	3.02345	2.65466	2.91444	3.66797	4.44079	3.8224	2.39193	1.96192	2.94112	4.36892	3.59422	3.4035	3.17988	2.78995	3.28797	Tumor	BLCA
TCGA-ZF-A9R4-01A	4.55558	2.66468	2.86329	3.11219	2.43045	3.4791	3.98059	4.11689	3.01034	2.77897	3.19147	4.19525	3.77706	4.37698	3.05746	3.11744	3.29325	Tumor	BLCA
TCGA-KQ-A41Q-01A	5.6501	2.71074	2.97204	2.74401	2.97673	4.42309	4.7451	3.75481	2.25234	3.11177	2.75718	4.4235	4.06164	4.38761	3.4094	2.92811	2.47684	Tumor	BLCA
TCGA-E7-A8O7-01A	3.73622	2.70887	2.96399	2.83667	1.88549	3.71385	4.09359	3.82946	2.91256	2.8	2.9835	3.51013	3.62114	3.60104	3.2195	3.52976	3.21387	Tumor	BLCA
TCGA-ZF-AA4W-01A	4.27171	2.67314	2.38776	3.33615	2.63071	3.7873	4.1763	3.25154	1.78539	2.60221	2.23649	3.7304	3.53171	3.39559	3.18373	3.07245	2.69658	Tumor	BLCA
TCGA-XF-AAN7-01A	5.57204	2.97542	3.44449	3.39679	2.41469	3.95473	4.23697	4.13861	2.75332	2.63382	2.55772	3.58864	3.27729	3.93114	5.12373	3.65107	2.73155	Tumor	BLCA
TCGA-XF-A8HH-01A	3.83623	1.80218	2.51468	2.87817	2.16689	4.10918	3.9262	3.48733	2.89098	2.01603	2.5659	3.40392	3.41234	3.40082	2.83078	2.11699	2.81732	Tumor	BLCA
TCGA-FD-A5BX-01A	4.78173	2.20172	2.20395	3.30143	2.03814	3.36245	3.04129	3.06934	1.30103	2.04851	1.78296	3.23365	3.6675	2.86083	2.384	2.87623	2.39238	Tumor	BLCA
TCGA-ZF-A9RE-01A	4.18389	2.77586	2.35312	2.99292	2.97929	3.82071	4.36863	3.84902	2.88456	2.87667	3.05387	4.29687	3.56388	3.83565	3.0986	3.38706	2.88572	Tumor	BLCA
TCGA-FT-A3EE-01A	4.77809	2.2047	2.82561	2.57592	2.83569	4.97063	4.1452	3.41239	2.01551	2.34645	2.80736	3.98102	3.83061	2.92304	3.44124	2.2755	2.9599	Tumor	BLCA
TCGA-XF-A9T5-01A	3.99286	2.71483	2.16055	4.11157	2.35323	4.39875	3.97138	3.38807	2.0079	2.24009	2.85192	3.88428	3.27623	3.43583	3.20939	3.1291	2.99163	Tumor	BLCA
TCGA-XF-AAML-01A	5.2957	2.58447	3.02279	3.16216	2.09407	4.39356	3.84141	3.79205	2.26079	4.14237	3.28894	3.66382	3.30135	4.88635	2.88793	2.32491	3.36262	Tumor	BLCA
TCGA-BT-A3PK-01A	3.6427	2.29559	2.72678	3.0921	2.41792	3.84611	4.27841	3.34038	1.98121	2.31132	2.79181	3.84633	2.91963	3.48578	2.37271	2.94521	2.73334	Tumor	BLCA
TCGA-CF-A3MI-01A	3.61162	1.66582	1.77556	2.18661	1.39443	2.8801	3.09351	2.7678	2.42209	1.94666	2.26928	3.10042	2.74266	2.5947	2.17829	2.24027	2.25482	Tumor	BLCA
TCGA-E7-A541-01A	4.85284	2.83257	2.87096	3.74947	2.4359	4.19623	4.19291	4.34497	2.92564	2.27306	2.7187	3.92632	3.89028	3.88304	2.90277	2.25989	2.87808	Tumor	BLCA
TCGA-ZF-AA54-01A	5.12541	2.45293	2.78435	2.91545	2.52029	4.46862	4.63314	3.63692	1.82129	3.45401	2.16684	3.71803	4.05826	4.16504	3.24013	3.52407	3.64717	Tumor	BLCA
TCGA-CU-A0YR-11A	3.51067	2.48694	2.54236	2.31494	2.48299	3.09216	4.19444	3.02764	2.56891	1.64717	2.70608	3.72649	2.98962	2.48665	2.62443	3.43706	2.50467	Normal	BLCA
TCGA-XF-AAMZ-01A	4.52355	2.72572	3.60066	4.61173	2.39022	4.41977	4.73469	4.03874	2.76805	2.94189	3.17444	3.81341	4.01326	4.2643	2.93343	3.14211	4.1018	Tumor	BLCA
TCGA-CF-A8HY-01A	4.70707	2.25879	2.32387	3.15155	1.29738	4.01656	2.89884	3.2046	1.79221	2.13631	2.27905	2.70277	3.88557	2.7198	2.67086	2.39079	2.85425	Tumor	BLCA
TCGA-GV-A3QG-01A	4.25619	2.46388	2.9605	3.1057	2.60575	4.07571	4.14538	3.50996	2.46242	2.3105	2.64678	4.09577	3.64514	3.05519	3.32567	2.83086	2.73033	Tumor	BLCA
TCGA-DK-A6B6-01A	3.76222	2.39576	2.35358	3.19898	2.84962	4.46406	3.79882	3.75518	2.83698	2.78315	2.98957	4.14104	3.41821	3.89072	3.31236	2.77273	3.84708	Tumor	BLCA
TCGA-DK-A6B0-01A	4.60242	2.57551	2.7706	3.0277	2.21516	3.92186	3.78394	3.53047	2.38615	2.59686	2.55691	3.72305	4.0782	3.04005	3.30749	3.24494	3.23846	Tumor	BLCA
TCGA-E7-A97Q-01A	5.90309	2.05699	2.62375	2.94768	1.97341	4.23688	3.965	3.64638	3.6755	2.18771	3.05724	3.61778	3.20599	3.39992	2.80862	2.50669	2.98183	Tumor	BLCA
TCGA-2F-A9KP-01A	4.48538	2.71123	3.18261	3.24156	2.56092	4.25664	4.73144	4.02117	2.65105	2.44205	3.10393	3.73435	3.34824	3.93411	3.8093	2.94485	3.3263	Tumor	BLCA
TCGA-FD-A62P-01A	4.73931	2.5574	2.40623	3.20076	2.52815	4.41216	4.46295	4.05522	2.24056	2.94581	2.92593	3.80069	4.78049	4.0031	3.41753	2.68761	3.02496	Tumor	BLCA
TCGA-XF-A8HG-01A	4.70104	1.87571	2.77493	3.63937	2.6108	3.82374	3.85995	3.55055	2.52217	1.73907	2.36365	4.19518	3.3964	3.60189	3.30404	1.84577	2.51858	Tumor	BLCA
TCGA-4Z-AA86-01A	5.00817	2.48303	2.97362	3.30193	2.95664	4.24964	4.08965	3.5	2.53261	2.92982	2.7228	4.01374	3.67764	4.29672	2.73005	2.70863	3.06896	Tumor	BLCA
TCGA-GD-A6C6-01A	4.99028	2.68669	1.05968	4.57862	2.41986	4.70593	2.42641	2.42281	1.34524	2.31013	1.54542	2.9211	4.56112	2.11205	2.66081	2.00201	3.57414	Tumor	BLCA
TCGA-G2-A2EJ-01A	3.30558	2.88613	3.29044	2.51085	3.00481	3.99437	3.91456	3.88091	2.15118	3.05858	2.97892	4.12143	3.43202	3.94197	3.47614	3.58177	3.27619	Tumor	BLCA
TCGA-UY-A9PD-01A	4.0595	2.4204	2.9699	3.47093	2.21145	4.77343	4.25195	3.97241	2.545	2.79247	2.61398	3.4211	3.63328	3.57223	3.50727	3.44016	3.16197	Tumor	BLCA
TCGA-S5-A6DX-01A	3.84542	2.37772	1.53893	3.01553	2.19561	4.18086	3.08047	3.23158	1.88614	2.18234	2.05921	3.28454	4.49505	2.07638	2.17107	2.12045	2.63145	Tumor	BLCA
TCGA-FD-A3SQ-01A	5.05078	2.66303	2.67685	3.11735	2.64874	3.82081	3.99375	3.29944	2.66536	2.47723	2.73309	3.7262	3.58502	3.11956	2.97614	2.91914	3.32285	Tumor	BLCA
TCGA-DK-AA77-01A	4.31406	1.85282	3.06028	3.35153	2.90724	4.17491	4.55177	3.87956	2.54836	2.56628	2.60353	4.36198	3.63738	3.67377	3.33938	3.5965	3.23104	Tumor	BLCA
TCGA-BL-A13I-01A	4.20608	2.86587	3.09927	3.0491	2.91447	3.64768	3.82922	3.50208	2.42879	2.63241	2.85035	4.02084	4.26097	3.4415	3.2648	3.9367	2.6495	Tumor	BLCA
TCGA-K4-A6MB-01A	4.68602	2.48267	2.61772	2.89354	2.28222	4.16114	4.29409	3.76548	2.79936	2.93617	3.43294	3.6413	3.38163	3.74472	3.06548	2.85876	2.88873	Tumor	BLCA
TCGA-ZF-AA51-01A	4.4964	2.21183	2.91321	2.58487	2.02025	4.68242	3.43836	3.51044	1.91344	2.31728	2.24051	3.54184	3.9614	3.1731	3.29728	1.3573	2.81912	Tumor	BLCA
TCGA-E7-A7PW-01A	5.03206	2.44875	2.29999	3.47269	2.14601	3.90328	3.75179	5.36526	2.62123	2.10319	2.92329	3.89726	3.83021	3.23005	3.47588	2.85379	3.2758	Tumor	BLCA
TCGA-E7-A85H-01A	4.39276	2.65984	3.71633	3.63208	2.55052	3.76335	4.49245	4.42083	2.83542	3.52226	3.18158	4.11967	3.28818	3.01782	2.99473	4.0692	4.07461	Tumor	BLCA
TCGA-GC-A3WC-11A	3.58259	2.4718	2.51472	2.36115	2.10651	2.96092	3.81902	3.11286	2.78646	2.09663	2.94073	3.54508	3.20353	2.69149	2.44454	3.18469	2.47484	Normal	BLCA
TCGA-XF-AAMR-01A	4.13539	2.6342	2.53596	2.80613	2.52854	3.51966	4.86081	3.32886	2.77164	2.04266	3.03674	3.86041	3.27712	2.83955	2.62295	3.53	3.16731	Tumor	BLCA
TCGA-FD-A6TG-01A	3.84137	2.16384	2.55872	2.4988	2.26934	4.57789	3.50963	3.80059	2.46338	2.39126	2.74987	3.56494	4.13258	4.29886	2.59115	3.46342	2.93238	Tumor	BLCA
TCGA-2F-A9KO-01A	4.3718	2.36221	2.83824	2.82148	2.95031	3.77654	4.42418	4.20902	2.7518	2.77398	2.91112	4.28149	3.47895	3.7628	3.18955	3.12798	3.54478	Tumor	BLCA
TCGA-HQ-A5ND-01A	4.11557	2.64068	3.40631	3.71455	3.26153	4.3418	5.57658	3.97521	1.36854	2.39991	3.09278	3.95291	4.00873	4.19271	3.30319	4.06567	2.63919	Tumor	BLCA
TCGA-G2-AA3B-01A	5.20557	2.10093	2.56341	3.17394	1.73293	4.16565	3.83112	3.6711	2.76028	2.8624	3.23129	3.28284	3.77757	3.05704	3.24083	3.01119	2.80355	Tumor	BLCA
TCGA-PQ-A6FI-01A	4.92936	2.92537	2.51023	3.69679	2.35129	4.11888	4.11436	3.91393	2.45961	2.92195	2.19688	3.539	3.70047	4.54454	3.20527	2.83915	3.58557	Tumor	BLCA
TCGA-C4-A0F7-01A	4.40496	2.02207	2.02173	3.70048	3.41912	4.58337	5.35218	3.70884	1.65393	1.52475	2.41405	4.80158	2.90737	2.98071	2.47793	3.65046	3.65653	Tumor	BLCA
TCGA-FD-A5BS-01A	4.52455	2.3458	2.2911	3.69526	2.09462	3.7372	3.15767	3.27712	1.75872	2.24952	2.06367	3.45701	3.74517	3.62882	2.54134	3.03736	2.97402	Tumor	BLCA
TCGA-GV-A3JX-01A	4.82111	2.70719	3.2055	3.60929	2.64539	3.85492	3.99135	4.1621	2.72208	2.49133	2.81872	4.15506	3.66801	4.16062	3.58614	2.16908	3.39781	Tumor	BLCA
TCGA-XF-AAMT-01A	4.17225	2.49792	2.63478	2.63924	2.73916	3.83852	3.97971	3.68803	2.95021	2.75206	2.95518	3.93959	3.63404	3.6437	3.14831	3.13347	2.97219	Tumor	BLCA
TCGA-XF-A9T8-01A	3.56413	2.46722	2.57908	2.59354	2.3387	3.81523	3.87916	3.37277	1.97497	2.02027	2.34461	3.71464	3.43928	3.04069	2.9897	3.09485	2.44312	Tumor	BLCA
TCGA-BT-A20W-11A	3.48215	2.43434	2.7152	2.45924	2.61168	3.69906	4.58051	3.57431	2.43185	2.381	2.99284	3.95314	3.14521	3.29972	2.74221	3.68557	2.98195	Normal	BLCA
TCGA-4Z-AA7S-01A	4.77287	2.36555	2.96954	3.30436	2.18312	3.4452	4.45971	5.99155	2.8459	1.75883	3.00622	4.2422	3.43918	3.91941	3.03386	3.02779	3.33639	Tumor	BLCA
TCGA-XF-A9SH-01A	4.43804	2.4369	2.62032	2.60408	2.02635	3.2331	4.13733	4.81363	2.80063	2.06213	2.61007	3.8446	3.26226	2.8749	2.84146	2.66851	2.95859	Tumor	BLCA
TCGA-DK-A1AG-01A	4.39651	2.66226	2.61352	2.90862	2.53293	3.91224	4.18671	3.82366	2.93727	2.60728	2.93801	4.19402	3.95275	3.13632	3.61817	3.34234	2.93314	Tumor	BLCA
TCGA-GD-A3OQ-11A	4.00419	2.53413	2.7674	2.48547	2.43192	3.39186	4.33496	3.44707	3.22287	1.97818	3.15572	4.06442	3.17048	3.22574	2.93901	3.50131	2.84809	Normal	BLCA
TCGA-2F-A9KR-01A	4.98304	3.03914	2.78824	2.9409	2.00828	3.82726	4.61238	4.00192	2.67419	1.26111	3.18411	3.58811	3.95179	3.91124	2.88718	2.61688	3.15739	Tumor	BLCA
TCGA-DK-AA6U-01A	5.17215	2.76129	2.76934	3.45354	2.46719	4.5775	4.36995	3.95324	2.78303	2.88843	3.25513	3.62389	3.74894	3.96529	3.01695	2.92867	3.98675	Tumor	BLCA
TCGA-C4-A0F6-01A	4.38534	2.61476	2.88246	3.10921	3.13141	4.04853	4.61062	5.5151	2.66793	2.22687	2.76228	4.21314	3.48934	3.79437	3.08965	2.54532	3.84287	Tumor	BLCA
TCGA-K4-A3WU-01B	4.60782	2.96852	2.59332	2.80176	2.31183	3.69109	4.14253	4.03833	3.04024	2.23659	3.21824	3.64703	3.34562	3.33885	3.01444	3.1711	2.83013	Tumor	BLCA
TCGA-CU-A0YN-01A	4.15241	2.25358	3.00632	2.97657	3.44885	4.17812	4.20221	3.78217	3.47597	2.92372	3.40512	4.68088	3.07501	4.42552	2.91179	3.17431	3.09021	Tumor	BLCA
TCGA-FJ-A871-01A	5.02358	2.61019	2.2358	4.15122	2.34011	4.2588	3.54093	3.51557	1.94011	3.29444	2.19086	3.32146	4.54996	3.76598	3.32779	3.34035	3.48492	Tumor	BLCA
TCGA-G2-A2EC-01A	3.54271	2.50482	2.68146	2.79339	2.5285	3.78785	4.6993	3.50278	2.5686	2.49655	2.66079	3.78235	3.31221	3.16422	2.72018	3.88269	3.54262	Tumor	BLCA
TCGA-FD-A5BV-01A	4.51114	2.22335	2.96454	3.30152	2.98412	4.05877	4.30602	3.35014	1.72893	1.74691	2.49944	4.4176	3.55684	3.78853	3.15972	2.08316	2.49756	Tumor	BLCA
TCGA-E7-A7XN-01A	3.48823	2.63812	2.69848	2.96577	2.84701	3.72709	3.86865	3.70867	2.04177	2.69675	2.34576	3.61	3.84034	4.03388	3.44965	3.34933	2.96578	Tumor	BLCA
TCGA-GU-A764-01A	3.73102	2.85418	3.13431	3.76909	2.40398	4.29675	4.38384	3.48956	2.10021	2.78253	2.61652	3.44139	3.97834	3.99241	2.97005	2.77106	2.99171	Tumor	BLCA
TCGA-XF-AAN8-01A	3.21593	1.90287	2.46633	2.72686	1.7174	2.74952	3.16012	2.91222	2.09798	2.43821	2.64581	3.05459	2.79812	1.73337	2.2717	3.28937	2.57247	Tumor	BLCA
TCGA-XF-A9SZ-01A	4.33679	2.15141	2.71086	3.17496	1.87583	4.06804	3.62896	3.2358	1.99252	2.29466	3.29242	3.09897	3.08914	3.09646	3.3107	2.8135	2.95123	Tumor	BLCA
TCGA-GU-AATO-01A	3.93679	2.15322	2.73851	2.90697	2.62976	5.0302	3.40037	3.39226	1.67988	2.41208	1.74436	4.01174	4.17791	3.71112	3.00041	1.91627	3.29669	Tumor	BLCA
TCGA-ZF-A9RC-01A	4.7972	2.67892	2.27867	2.93152	1.87671	4.06719	3.07391	4.94191	2.20883	1.78328	2.37369	3.18612	3.77657	3.87371	3.02452	2.55655	3.18994	Tumor	BLCA
TCGA-ZF-A9R0-01A	5.50635	2.25045	1.87664	3.03394	1.76927	2.72849	3.29802	3.06447	2.71329	1.62742	2.61226	3.56132	3.70801	2.88506	3.28472	1.72123	2.87767	Tumor	BLCA
TCGA-KQ-A41P-01A	4.82937	2.13293	1.97651	3.10179	2.0403	3.45306	3.51097	3.48953	2.82141	2.10279	2.15897	3.66424	4.05192	3.91718	3.07196	2.30668	3.20463	Tumor	BLCA
TCGA-4Z-AA7W-01A	4.36228	2.44543	2.28506	4.36654	2.12301	4.02231	3.30794	3.1113	1.48104	2.73622	1.81618	3.46853	4.6384	3.59542	2.81526	2.62809	2.37945	Tumor	BLCA
TCGA-HQ-A5NE-01A	3.96866	2.54379	3.0496	2.98616	2.71534	4.35761	3.81788	3.54274	2.18454	2.56134	2.76518	3.93857	4.03124	4.18314	3.15969	2.82789	2.55865	Tumor	BLCA
TCGA-CU-A3KJ-01A	4.7558	2.3513	3.53261	3.15884	2.87637	3.88022	4.52618	3.61381	1.60414	1.82118	2.62925	4.55876	4.06951	3.55854	2.64442	2.1017	2.70497	Tumor	BLCA
TCGA-UY-A8OC-01A	4.48335	2.11843	2.46795	2.50587	2.23529	3.60356	3.51616	3.24571	1.89861	2.35485	1.95749	3.45017	3.3273	3.70775	2.10344	2.51491	2.68701	Tumor	BLCA
TCGA-E7-A3Y1-01A	4.91597	2.37318	2.34947	2.87603	2.01415	3.46862	3.00225	3.3137	3.263	1.9991	3.11295	3.49526	3.40558	2.75532	3.33766	2.8663	2.72468	Tumor	BLCA
TCGA-XF-AAN5-01A	4.23512	2.42534	2.0943	3.26122	2.64764	3.97541	4.47724	3.68991	2.37822	2.4711	2.82088	4.24389	3.4866	3.19186	3.53983	3.17871	2.74883	Tumor	BLCA
TCGA-G2-AA3D-01A	4.20315	2.73946	2.84727	3.37947	2.20361	3.97625	4.36666	3.75935	2.5849	2.44491	3.36004	4.31975	4.16377	4.52294	2.89207	3.15097	3.51946	Tumor	BLCA
TCGA-GU-A42R-01A	4.35376	2.81935	3.13128	3.00393	2.8443	3.84028	4.14082	4.44423	3.46971	2.54868	3.58085	4.55495	3.78408	3.99913	2.64241	3.59644	3.76921	Tumor	BLCA
TCGA-XF-A9SI-01A	4.5318	3.0571	2.60594	3.62788	2.12044	4.0217	3.79125	3.80796	2.92279	2.40484	2.74974	3.64909	4.28029	2.10365	3.5647	3.48639	3.28731	Tumor	BLCA
TCGA-GV-A3JZ-01A	4.97066	2.64053	2.65808	3.56671	1.86068	4.29001	3.79129	3.98757	2.2797	2.84006	3.65147	3.23148	3.39193	4.09677	3.23589	3.90867	2.55788	Tumor	BLCA
TCGA-E9-A1NI-01A	4.27705	2.0187	2.70955	2.33665	2.62138	3.85684	3.77138	3.70433	2.80803	2.731	3.15739	4.37777	2.99243	3.33295	3.02389	3.52643	3.53799	Tumor	BRCA
TCGA-A1-A0SP-01A	4.28738	2.74631	3.15787	3.29309	2.71366	4.61535	4.32681	4.12857	2.08031	3.19282	3.24889	4.29941	3.59	3.54352	3.53835	3.20318	3.53665	Tumor	BRCA
TCGA-BH-A1EU-11A	2.9464	2.71139	2.66565	2.41421	2.66982	3.47917	4.95835	4.26489	3.41599	2.60896	3.54592	4.26193	2.8851	2.71592	2.86051	3.83231	3.0862	Normal	BRCA
TCGA-A8-A06X-01A	4.90151	2.98146	3.14429	2.1625	2.3451	3.99763	4.03719	3.73267	2.93621	2.76171	3.5158	4.76546	3.49528	3.85596	2.88786	3.5773	3.09174	Tumor	BRCA
TCGA-E2-A14T-01A	4.06727	2.32452	2.6746	2.63883	2.44813	3.92044	4.13417	3.78855	2.4511	2.0199	2.98813	4.01004	3.53432	2.99519	3.14098	3.20692	2.89574	Tumor	BRCA
TCGA-AC-A8OS-01A	4.75627	2.68503	2.67026	2.97538	2.35953	3.14667	3.67866	3.6026	3.55313	2.20232	3.26933	3.77164	3.76437	3.31566	2.7845	3.60481	2.81325	Tumor	BRCA
TCGA-A8-A09K-01A	4.94259	2.53011	2.89035	2.58117	2.63529	4.02442	4.00355	3.73207	3.41356	1.91967	4.02236	4.07128	3.24805	4.0879	3.54502	4.15895	3.40565	Tumor	BRCA
TCGA-OL-A5RY-01A	3.58091	2.52686	2.84802	3.90526	2.35047	3.84551	4.03297	3.50402	2.53867	2.5797	2.94872	3.86239	2.95556	3.12813	2.91464	3.54439	2.88736	Tumor	BRCA
TCGA-BH-A0DG-01A	3.4966	2.46921	2.49512	2.59954	2.67703	3.65645	3.9271	3.56483	3.68115	2.66492	2.91738	4.05	2.97104	3.27424	2.92557	3.67218	3.41097	Tumor	BRCA
TCGA-B6-A0I9-01A	3.82423	2.53878	2.87862	2.15186	2.50374	3.83237	4.92426	3.94561	2.41753	2.36071	3.21936	4.90312	3.49287	4.32196	3.02238	4.27948	4.17178	Tumor	BRCA
TCGA-A2-A0CP-01A	4.49492	2.36344	2.6355	2.74685	2.24591	3.61909	3.54805	3.43672	2.38097	2.33102	3.03728	3.50764	3.4074	3.07626	2.7211	3.52489	2.71653	Tumor	BRCA
TCGA-A8-A07S-01A	3.40341	2.62082	3.23473	2.73267	3.02788	3.87194	3.69514	3.7519	3.47036	2.43416	3.58587	4.25167	3.3097	3.5314	3.12284	3.9241	3.24514	Tumor	BRCA
TCGA-AO-A12H-01A	3.33265	2.55093	2.83723	2.21449	2.49435	3.6921	4.2656	3.46743	2.77134	1.75625	2.98148	4.26778	2.89553	2.90257	3.18218	3.67745	2.97829	Tumor	BRCA
TCGA-BH-A203-11A	3.1903	2.4781	2.54099	2.46617	2.56521	3.41578	4.76286	3.94881	3.54355	2.4645	3.51823	4.28004	2.6475	2.58475	2.76272	3.63611	3.07649	Normal	BRCA
TCGA-AR-A1AU-01A	4.43082	2.47771	2.96833	2.47466	2.11187	3.53188	4.66261	3.86869	2.88382	1.54879	3.20188	3.75517	3.62432	3.24286	3.23144	3.57381	3.09249	Tumor	BRCA
TCGA-D8-A1X9-01A	3.61026	2.68355	3.16264	2.43984	3.44235	3.94913	5.04997	4.12195	2.73576	2.63194	3.51988	4.46339	3.92709	3.77138	3.00625	4.16838	3.84793	Tumor	BRCA
TCGA-E9-A1RH-11A	2.77725	2.30165	2.26423	2.59991	2.30883	3.3439	4.05296	3.10484	2.60268	2.09092	2.7812	3.56443	2.58508	2.12501	2.41149	3.45134	2.48926	Normal	BRCA
TCGA-A8-A07R-01A	3.72413	2.53182	3.9591	3.28395	4.29419	3.46248	4.73413	4.63682	2.65059	3.46431	3.73108	5.54324	3.76388	4.39288	3.81244	3.71476	4.66536	Tumor	BRCA
TCGA-AO-A12C-01A	3.72454	2.54238	2.68561	2.384	2.43457	3.56438	3.98227	3.62372	2.99511	2.18615	3.31781	4.25274	2.65657	2.8413	2.85073	3.42937	2.92141	Tumor	BRCA
TCGA-V7-A7HQ-01A	5.57853	2.33952	1.8685	3.38762	1.90481	3.85078	2.32809	2.606	1.79377	2.25616	2.94837	2.86428	3.83493	2.52256	2.85649	2.5069	2.90735	Tumor	BRCA
TCGA-A2-A1FZ-01A	3.5685	2.68057	2.82382	2.46526	2.91913	3.61687	4.67729	3.82305	2.97419	2.24252	2.94253	4.30591	3.30354	3.51667	3.16857	3.78567	3.14311	Tumor	BRCA
TCGA-AR-A251-01A	4.08843	2.36312	3.59406	3.39316	2.99781	3.80234	4.17224	4.17659	3.17772	2.95141	3.58314	4.08765	2.86644	3.07182	3.93699	3.59217	4.37315	Tumor	BRCA
TCGA-BH-A18J-11A	3.96353	2.58105	2.69171	2.77619	2.2742	3.26537	4.3519	3.60201	3.61098	2.33405	3.53289	4.20277	3.32269	2.87552	2.88719	3.95441	3.0076	Normal	BRCA
TCGA-EW-A1PF-01A	4.27919	2.49723	2.86154	2.17729	2.19208	3.54583	4.11125	3.60036	2.6699	1.92968	3.10499	3.68532	3.58154	3.45579	2.47832	3.98871	3.16143	Tumor	BRCA
TCGA-BH-A18T-01A	4.86943	2.87723	3.81724	3.38043	2.38448	5.04477	4.73945	4.34383	3.09112	3.17296	3.73925	3.97187	3.14505	4.07925	3.01778	4.57532	3.65394	Tumor	BRCA
TCGA-AR-A24S-01A	4.68823	2.41449	3.03635	2.22717	3.23819	3.84424	4.10746	3.61832	3.30125	2.57298	2.91312	4.62869	3.08218	3.31501	4.03645	3.55651	2.57446	Tumor	BRCA
TCGA-AN-A041-01A	3.12317	2.55373	2.83877	2.48614	2.79061	3.67287	4.38727	4.17548	2.67418	2.56675	3.56659	4.17118	3.87026	3.62197	2.80807	4.12095	3.42171	Tumor	BRCA
TCGA-BH-A0E0-11A	3.64569	2.42735	2.75879	3.03337	2.13174	3.95784	3.95187	3.08362	2.68399	2.69882	2.95424	3.51375	3.31968	3.02816	2.97646	3.48634	3.09016	Normal	BRCA
TCGA-E2-A1LL-01A	3.51678	2.4224	2.88009	2.92881	3.39405	4.33744	4.2539	3.56338	1.80717	2.64314	3.12885	4.40082	2.94172	4.28844	2.77697	3.46016	2.84791	Tumor	BRCA
TCGA-E2-A1IJ-01A	3.69007	2.46927	2.74765	2.45064	2.47718	3.46315	3.886	3.45385	2.76059	2.53103	2.99337	3.5452	3.19527	3.03544	2.73452	3.92493	2.95379	Tumor	BRCA
TCGA-AR-A24O-01A	3.35084	2.48899	2.94096	2.25261	2.76823	3.64024	4.4295	3.90753	3.20496	2.25031	3.43931	4.46154	3.01067	2.89382	2.78176	3.80128	2.96694	Tumor	BRCA
TCGA-XX-A899-01A	4.37396	2.57133	2.84702	3.00592	2.46207	3.05387	3.76231	4.00752	2.74144	2.12396	3.01083	3.82712	3.57761	2.86411	3.09548	3.97724	2.83898	Tumor	BRCA
TCGA-D8-A1XK-01A	4.9058	2.94378	2.59386	4.13599	3.57997	5.02416	5.59331	3.86909	2.25018	2.74996	3.10917	5.01591	2.96965	3.85318	3.5515	3.65924	3.66387	Tumor	BRCA
TCGA-AC-A5XS-01A	4.12598	2.80151	2.30909	2.95862	2.58959	4.19993	3.63975	3.76292	2.58912	2.94664	3.33343	3.75286	3.81312	3.58255	3.41078	3.71535	4.01427	Tumor	BRCA
TCGA-BH-A18L-01A	4.98589	2.53907	3.1324	2.4908	3.45113	3.92013	3.7942	4.10285	2.80487	2.45287	3.65103	4.74378	3.3191	3.81009	3.41981	4.07129	3.94181	Tumor	BRCA
TCGA-OL-A66J-01A	4.22316	2.66709	2.60212	2.88528	2.43179	3.4529	3.65675	3.7592	2.5781	2.25572	2.79618	3.83674	3.3508	2.84849	3.27994	3.50988	3.19519	Tumor	BRCA
TCGA-PE-A5DD-01A	4.86658	2.68743	2.92269	3.04337	2.12285	3.45605	3.3921	3.63191	3.65803	2.42011	3.09468	3.76776	4.07173	3.09295	2.92755	3.47485	3.06225	Tumor	BRCA
TCGA-AN-A04D-01A	5.00181	2.82632	3.29287	3.176	2.01074	4.16167	4.95294	4.40156	2.34896	2.72354	3.64547	3.62568	3.38308	3.31478	3.42514	3.99469	4.26595	Tumor	BRCA
TCGA-4H-AAAK-01A	4.95149	2.48648	2.85	2.62415	2.30262	3.11841	3.71648	3.86799	3.14565	2.33656	2.9142	3.86051	3.72143	3.25086	3.13831	3.75733	3.01283	Tumor	BRCA
TCGA-E9-A5FL-01A	3.63464	1.95478	1.93059	2.76623	2.26308	4.11793	3.8738	3.08018	2.08734	2.54538	3.02863	3.42821	3.67611	2.97736	3.44026	2.64736	2.7203	Tumor	BRCA
TCGA-E9-A24A-01A	3.02379	2.59173	2.90771	1.6972	3.09127	3.82136	4.0886	3.95041	3.48861	2.7284	3.64643	4.37673	3.17873	3.16266	3.17525	3.99879	3.36934	Tumor	BRCA
TCGA-BH-A1FM-01A	1.92842	1.87868	2.85148	1.64895	2.79921	3.99972	5.39327	4.03415	2.81324	2.27237	2.93921	5.26996	2.19685	3.06987	3.39124	3.26023	3.92367	Tumor	BRCA
TCGA-A8-A07C-01A	2.88973	2.63426	3.82903	2.6862	3.22249	4.80838	4.73138	4.40101	2.50702	3.04595	4.25432	4.44169	3.49747	3.37801	4.20881	3.61201	3.50822	Tumor	BRCA
TCGA-AR-A24Q-01A	2.86182	2.51388	2.7537	2.53554	2.75572	3.13188	4.99505	3.78672	2.45229	2.41336	3.67149	4.15312	3.3332	2.61602	3.08885	3.73215	3.58933	Tumor	BRCA
TCGA-AR-A2LE-01A	3.81282	2.32057	2.75676	2.24263	2.67206	3.42502	3.69799	3.79083	3.28175	1.91295	3.27952	4.3071	3.01852	2.82235	2.93027	3.4314	2.9059	Tumor	BRCA
TCGA-AR-A0U4-01A	4.31752	2.45122	2.99568	3.08927	2.91969	3.62038	4.98365	3.57584	2.41598	2.84191	3.32954	4.37871	2.80091	3.38762	3.18818	3.07505	3.30429	Tumor	BRCA
TCGA-GM-A2DN-01A	4.21235	2.58653	2.97703	2.74512	2.63337	3.8262	3.99284	3.9164	2.79527	2.52371	3.4668	4.20794	3.33271	3.46204	3.39387	3.99613	3.16538	Tumor	BRCA
TCGA-A7-A13D-01A	3.79282	2.89562	2.38859	3.06848	2.47905	4.24735	4.16114	3.65234	2.84611	2.44727	2.94656	3.7011	4.26099	3.69025	2.67573	3.34789	3.48535	Tumor	BRCA
TCGA-D8-A1JG-01B	4.06861	2.68489	3.28723	3.57538	2.78421	3.77139	4.02027	3.84925	2.99586	2.26841	4.04667	4.43498	3.17934	3.42799	3.45675	3.57008	3.28102	Tumor	BRCA
TCGA-E2-A570-01A	4.18767	2.54145	2.79833	3.37211	2.32077	3.74266	3.51537	3.68107	2.65263	2.38172	3.24084	3.80037	3.16624	3.63094	3.53922	3.57236	3.41459	Tumor	BRCA
TCGA-A2-A04Q-01A	4.14609	2.63742	3.69193	2.75539	2.65205	3.97311	4.72621	3.82243	2.48531	2.93922	3.01926	4.01817	3.73607	2.79588	3.32214	3.53172	3.10318	Tumor	BRCA
TCGA-A7-A6VV-01A	5.1187	2.64504	2.81027	2.4098	2.96138	3.12525	4.13223	3.55426	2.56806	2.65936	3.05499	4.41746	4.19972	2.91863	5.73767	2.37433	3.56367	Tumor	BRCA
TCGA-E2-A1IG-01A	3.9364	2.56959	3.15957	2.58568	2.84131	3.61169	3.39096	3.80584	2.07721	1.63263	2.91256	4.18612	4.19196	3.07201	2.97253	4.02218	2.82947	Tumor	BRCA
TCGA-E9-A1N6-01A	4.4216	2.3683	2.83768	2.12128	2.44859	3.75356	4.11715	4.06653	2.61058	2.62435	3.26673	3.78822	3.13362	3.37118	3.32666	4.15475	3.09332	Tumor	BRCA
TCGA-E9-A1NC-01A	4.42459	2.91601	2.48834	2.61499	1.74054	2.84451	4.01278	3.52677	2.37227	2.91073	2.84518	3.1431	3.44192	3.06623	2.60847	3.38018	3.02973	Tumor	BRCA
TCGA-A7-A3IZ-01A	4.23085	2.47585	3.06959	1.87066	2.87587	2.93981	3.91879	3.95022	2.68877	2.20114	3.26066	4.54879	2.95891	3.68352	3.38339	4.3045	3.16094	Tumor	BRCA
TCGA-BH-A18U-11A	3.89378	2.67769	2.86404	2.58054	2.40861	3.40922	4.73312	3.72343	3.67298	2.36948	3.48914	4.1525	3.34797	2.96728	2.946	3.82906	2.99449	Normal	BRCA
TCGA-AN-A0AK-01A	3.65948	2.9263	3.27254	2.92033	3.10218	3.31745	5.02269	4.17649	2.58085	2.69002	3.50886	4.55893	4.32081	2.66872	3.88172	3.5846	3.41716	Tumor	BRCA
TCGA-D8-A1JM-01A	4.45729	2.84026	2.49532	2.48428	3.23187	4.62185	4.89275	4.16318	2.27275	2.67336	3.96794	4.26267	3.95815	3.44783	3.44914	3.83561	3.64996	Tumor	BRCA
TCGA-OL-A5S0-01A	5.16398	2.4607	3.49914	3.4057	1.96339	4.39698	3.59157	3.78008	1.81274	2.51434	3.44032	3.39014	4.6499	3.57885	3.32482	3.65444	3.08669	Tumor	BRCA
TCGA-A8-A06Z-01A	3.73136	2.47787	3.5539	2.56818	2.53579	3.21781	3.84012	3.70167	3.30024	2.3807	2.96501	3.93046	3.52095	3.43428	2.84284	3.91302	3.48815	Tumor	BRCA
TCGA-AQ-A54O-01A	4.80661	2.13953	2.4577	2.96678	1.71133	3.75106	4.00815	3.07374	3.22652	1.98848	2.58925	3.3056	3.28778	3.35133	3.50581	2.83242	3.89184	Tumor	BRCA
TCGA-E2-A15S-01A	5.13787	2.75923	2.86931	3.00075	2.10905	4.37197	4.06902	4.14772	4.00647	2.38216	3.1961	3.76338	3.38322	3.60559	3.02139	4.01151	4.04963	Tumor	BRCA
TCGA-BH-A1ET-11B	3.59352	2.70777	2.80702	2.81532	2.63438	3.32416	4.82481	4.06422	3.85101	2.45795	3.67596	4.3702	3.0422	2.848	2.75502	3.95244	3.09685	Normal	BRCA
TCGA-BH-A18R-11A	3.69078	2.60763	2.85538	2.57573	2.30203	3.31928	4.68482	3.82081	3.64798	2.31722	3.63647	4.13754	3.06188	2.77611	2.70367	3.84237	3.08873	Normal	BRCA
TCGA-EW-A423-01A	4.94888	2.17965	2.59455	3.26095	1.74535	3.15683	2.987	3.30825	2.86031	2.26128	3.11881	3.34655	4.16108	2.72658	2.9424	3.6833	3.29915	Tumor	BRCA
TCGA-C8-A273-01A	4.35464	2.36459	2.9438	3.03258	2.59034	3.83405	4.19234	3.68919	2.91317	2.52226	2.91408	4.08617	2.85594	3.75216	3.26022	3.57336	3.39872	Tumor	BRCA
TCGA-OL-A5RV-01A	4.87155	2.65148	2.84323	3.16504	2.41238	3.48892	4.02618	4.14304	3.03018	2.37543	3.54458	3.79313	3.67315	3.7113	3.27024	3.61202	2.79092	Tumor	BRCA
TCGA-AC-A2FM-01A	4.80119	2.30722	2.96735	2.86683	2.73038	3.0704	4.29698	3.89551	2.47959	2.14252	3.31428	4.74901	3.31454	3.58342	3.38317	3.79338	3.00437	Tumor	BRCA
TCGA-AO-A0JM-01A	3.01859	2.61727	3.25898	2.22408	3.45314	3.98519	3.91817	3.52571	2.79627	2.83098	3.13207	4.16814	3.02229	3.32966	3.57491	4.20061	3.4805	Tumor	BRCA
TCGA-BH-A0DP-01A	3.67307	2.44572	2.60025	2.91772	2.49914	3.55345	4.1612	3.59809	2.9768	2.58477	3.15617	3.85134	3.2342	3.11917	3.0629	3.66362	3.00719	Tumor	BRCA
TCGA-A2-A25E-01A	4.39351	2.35008	3.13765	2.73661	2.73622	3.94116	5.11727	4.96247	2.40205	2.32326	3.51528	4.20821	3.24252	3.05664	3.69735	3.93368	4.02076	Tumor	BRCA
TCGA-B6-A2IU-01A	4.49394	2.77926	3.06476	2.71693	2.85899	3.6426	3.98435	3.84534	3.29632	2.06049	3.49181	4.19938	3.6061	3.87938	3.62688	3.94092	3.55772	Tumor	BRCA
TCGA-BH-A18P-01A	3.48026	3.02645	3.32975	2.69289	3.10866	4.0307	3.74832	4.30318	2.94644	1.84057	3.56198	4.61837	3.94377	4.70555	3.49645	4.09024	3.54446	Tumor	BRCA
TCGA-E9-A22B-01A	3.38689	2.11708	3.13024	1.62961	2.24084	3.91254	4.65017	3.55931	2.56625	2.13875	2.94648	3.85822	2.94216	3.32938	2.88438	3.30349	3.1125	Tumor	BRCA
TCGA-A2-A0SW-01A	4.58274	2.40596	2.99624	3.03821	2.20101	3.66084	4.20586	4.01483	3.10072	2.3822	3.13931	3.46138	3.13933	3.41193	2.95021	3.66031	3.74654	Tumor	BRCA
TCGA-E2-A107-01A	4.39708	2.53193	2.96128	3.22908	2.66554	3.76603	3.58678	4.19935	2.33228	2.3319	3.29722	3.99178	3.74808	3.40285	3.38108	3.811	3.06307	Tumor	BRCA
TCGA-E2-A1B6-01A	3.48794	2.61992	3.23197	3.3367	2.4383	4.17898	4.43015	3.53822	3.06004	2.74459	3.71932	4.02008	3.44461	3.05254	4.16404	3.43507	3.52545	Tumor	BRCA
TCGA-D8-A1XW-01A	4.22668	2.40637	2.65034	1.8549	2.20625	3.26202	4.70316	3.50589	3.32427	2.50238	3.64751	3.75337	2.99921	3.48837	2.38677	3.32174	3.10493	Tumor	BRCA
TCGA-A7-A0DC-01A	3.68614	2.99835	3.50647	1.68274	3.58622	3.72985	4.85159	4.72165	3.88165	2.27294	3.47528	4.64286	2.65986	3.30092	4.0594	4.03096	4.42243	Tumor	BRCA
TCGA-EW-A6SD-01A	4.42326	2.86106	3.06061	2.56851	2.6794	4.01354	4.02368	3.75638	2.78406	3.28623	3.54797	3.8637	4.00769	3.64536	3.42735	4.10672	3.30576	Tumor	BRCA
TCGA-AO-A0J3-01A	4.34183	1.68669	3.6173	3.10988	3.40472	4.54234	3.79748	4.03263	2.65157	2.37505	3.403	4.36133	2.82599	4.68485	3.47292	3.77619	3.29148	Tumor	BRCA
TCGA-A7-A0DC-11A	3.59611	2.48625	2.40877	2.54261	2.38534	3.36048	4.22869	3.29243	2.85414	2.42307	3.06147	3.91483	2.92277	2.54191	2.82743	3.5372	3.05394	Normal	BRCA
TCGA-AN-A03X-01A	3.2711	2.12286	2.83984	2.18685	2.59981	3.82923	3.66845	3.29456	2.37681	1.53008	2.65522	3.75607	2.88949	2.77768	3.05607	3.43425	3.35432	Tumor	BRCA
TCGA-BH-A1FM-11B	3.80281	2.60616	2.93781	2.72338	2.55422	3.34867	4.86081	3.78847	3.96382	2.28385	3.87195	4.35422	3.1711	2.77225	2.82267	3.98101	2.92118	Normal	BRCA
TCGA-A8-A099-01A	3.29891	2.8051	3.08452	1.86494	2.81029	4.16008	3.84175	3.74036	3.72584	2.51399	3.13767	4.00029	3.56228	3.75272	3.38329	3.98506	3.46613	Tumor	BRCA
TCGA-E2-A14Z-01A	4.79066	2.251	2.88759	2.39231	2.41812	4.03177	3.7937	3.72823	2.94179	2.25713	3.19394	4.16705	3.25194	3.22249	3.09562	3.10878	2.96582	Tumor	BRCA
TCGA-AR-A5QP-01A	4.07586	2.71375	2.72563	3.36173	2.46703	3.651	4.62215	3.78854	3.1362	2.91544	3.38348	3.90757	3.77406	3.14683	3.33428	3.67326	3.31005	Tumor	BRCA
TCGA-AC-A62X-01A	4.31032	2.6168	2.71115	2.95714	2.13022	3.68343	3.94853	4.04444	2.0909	2.82732	3.43866	3.75014	3.3107	3.06024	4.0131	3.74196	3.08165	Tumor	BRCA
TCGA-BH-A42V-01A	4.94722	2.66996	2.82948	3.09081	2.32184	3.44662	3.86854	3.76051	3.16697	2.63675	3.33885	3.84869	4.0933	2.95308	3.06573	3.58436	3.08164	Tumor	BRCA
TCGA-B6-A0RS-01A	3.85845	2.45356	3.2646	2.67715	2.95505	4.08073	4.40607	3.53516	2.56527	2.60237	2.81929	4.00203	3.56048	3.08358	3.14433	3.68121	2.90829	Tumor	BRCA
TCGA-D8-A1JL-01A	3.78132	2.47595	3.02276	3.13722	3.16454	3.66208	4.64731	3.83264	2.84486	2.61893	3.57046	3.66333	3.10854	3.26829	3.08691	3.78185	2.69403	Tumor	BRCA
TCGA-BH-A0DZ-01A	2.99884	2.33551	2.91728	2.04972	2.58506	3.63833	3.87859	3.71359	1.63848	2.81331	2.70411	4.45515	3.11651	3.52655	4.55144	3.42914	3.23775	Tumor	BRCA
TCGA-A8-A06Y-01A	4.17528	2.422	2.86346	2.88591	3.03363	3.5812	4.58267	3.9417	3.12301	2.79505	3.01385	4.41899	3.31329	3.95113	3.33688	3.65258	3.86011	Tumor	BRCA
TCGA-B6-A1KC-01B	2.67639	2.15608	2.71447	2.13902	2.17505	3.5867	4.3153	4.12536	3.31895	2.28992	2.82595	4.19861	3.00239	3.36993	3.91609	3.53573	3.12015	Tumor	BRCA
TCGA-C8-A135-01A	4.26205	2.61048	2.72755	3.13108	2.43263	4.04136	3.99506	3.71458	2.89346	3.74187	3.21686	4.43711	3.21661	3.37212	3.16885	3.86645	3.74525	Tumor	BRCA
TCGA-5L-AAT1-01A	4.40303	2.78891	2.85328	3.08092	2.44694	3.62309	3.39592	3.52235	2.74934	2.83819	2.83688	3.64664	3.88319	3.25598	3.29508	3.5839	3.33131	Tumor	BRCA
TCGA-AR-A24R-01A	4.11014	2.45483	3.15159	2.61642	3.04026	3.9348	5.09291	4.02972	3.82123	2.11677	3.4444	4.80135	2.5411	3.78576	3.31948	3.9273	5.57996	Tumor	BRCA
TCGA-S3-AA0Z-01A	4.05079	3.0682	2.9158	1.93184	2.12851	4.00243	3.68323	4.10204	2.81912	2.56579	2.69851	4.09444	3.93603	3.78226	3.23991	4.07117	2.92384	Tumor	BRCA
TCGA-D8-A1J8-01A	2.20243	2.77904	2.56751	2.17441	3.3703	4.35336	4.40347	4.3888	3.05291	2.38388	3.68054	5.40905	2.87116	3.30707	3.22905	3.36072	3.9215	Tumor	BRCA
TCGA-A2-A0ER-01A	3.0941	2.30448	2.95024	2.20535	3.11877	3.80869	4.87985	3.69484	2.18161	1.89442	2.73482	4.33609	2.74736	3.23815	3.35791	3.7115	2.975	Tumor	BRCA
TCGA-E9-A1ND-01A	3.83784	2.63534	2.65775	3.53609	3.06032	4.32636	3.78343	3.67438	2.80077	2.58078	2.87019	4.15167	3.1663	3.97478	2.73051	3.11709	3.08232	Tumor	BRCA
TCGA-GI-A2C8-11A	2.39839	1.63803	1.83431	1.84727	2.27418	2.18905	3.08926	2.15975	2.51101	1.52423	2.18055	2.51824	2.5515	1.46627	1.51762	3.3892	1.88495	Normal	BRCA
TCGA-A2-A1G1-01A	3.25127	2.77584	2.77557	1.76396	3.06474	4.74553	5.0227	3.96132	2.50374	2.74798	3.53208	4.4592	2.70985	3.85799	3.66336	2.98101	3.29507	Tumor	BRCA
TCGA-A2-A0SU-01A	3.3273	2.407	2.97564	2.50122	2.74402	4.03528	4.15035	3.62904	2.12172	2.62176	3.1831	4.11017	3.76723	3.57945	3.30991	3.92954	3.40344	Tumor	BRCA
TCGA-E2-A1LB-01A	2.51734	2.46025	2.42484	1.98492	2.93072	3.63833	3.73822	3.42968	2.56077	2.71587	2.7624	4.14116	3.85162	3.47114	3.13636	3.93411	3.51006	Tumor	BRCA
TCGA-E9-A1RD-01A	3.47706	2.4792	3.00097	2.13159	2.9901	4.07104	4.02664	3.93198	3.51975	2.64424	3.59074	4.47145	3.32652	3.40299	3.28712	3.84913	3.37353	Tumor	BRCA
TCGA-OL-A6VQ-01A	4.35346	2.58804	2.82869	2.57382	2.61997	3.38631	3.95635	3.72103	3.07386	2.1408	3.39684	3.82477	3.41918	3.17716	3.02821	3.83159	2.89599	Tumor	BRCA
TCGA-AQ-A04J-01A	4.08441	2.49047	3.11746	2.79213	2.62842	4.1452	5.28951	3.82869	2.88267	2.74573	3.61256	3.9835	3.0288	3.36864	3.94648	3.51896	3.39885	Tumor	BRCA
TCGA-AQ-A1H3-01A	3.91228	2.48203	3.02343	2.79477	3.08453	3.75025	4.27497	3.8381	2.97976	2.51865	3.67635	4.44563	3.20093	3.91433	3.35251	3.81586	3.31161	Tumor	BRCA
TCGA-A2-A259-01A	4.43485	2.36283	2.8687	2.34172	2.84914	3.22595	4.26917	3.81236	3.0814	2.7508	3.58093	4.27476	2.86153	3.19817	2.87588	3.82897	2.92337	Tumor	BRCA
TCGA-WT-AB44-01A	3.9882	2.32879	2.10317	3.10238	2.0429	3.26315	3.04699	3.2592	3.43644	2.39191	2.97419	3.60028	3.46496	1.75679	3.0761	3.55324	2.4159	Tumor	BRCA
TCGA-B6-A0IN-01A	3.1839	2.24449	2.24785	1.77888	2.23976	3.25463	3.45477	3.0475	2.0192	2.17632	2.41846	3.66464	3.92128	2.70794	2.88196	3.15063	2.64361	Tumor	BRCA
TCGA-E9-A1R3-01A	2.9323	2.60618	2.84361	1.67491	3.05029	3.93462	4.0949	3.64875	2.94118	2.76071	3.72287	4.33333	2.79597	3.78229	2.95035	3.58646	3.43666	Tumor	BRCA
TCGA-A8-A086-01A	4.42194	2.39906	2.56398	2.36063	2.64744	3.79936	3.99715	3.55234	3.49224	2.53418	3.0473	4.01857	2.97747	3.15475	3.01151	3.62654	3.26516	Tumor	BRCA
TCGA-AC-A3BB-01A	4.29729	2.53898	2.53034	3.04543	2.37821	3.65849	4.43426	3.59652	2.9074	2.35498	2.79514	3.65447	3.76886	2.98354	2.93809	3.69751	3.05355	Tumor	BRCA
TCGA-AC-A2QI-01A	4.1496	2.74239	2.82955	2.8795	2.66053	3.64844	3.90815	3.5918	2.81091	2.94122	3.4415	4.02474	3.6041	3.46596	2.9626	4.07037	3.37563	Tumor	BRCA
TCGA-BH-A1F5-01A	3.10956	2.33225	2.78125	1.68297	3.11687	4.1749	4.60681	4.30352	3.68689	2.44142	4.03098	4.89033	2.43358	2.67683	3.66105	3.55892	3.55724	Tumor	BRCA
TCGA-AC-A3HN-01A	4.16805	2.64556	2.7754	2.77218	2.56797	3.49151	3.86018	3.61949	2.81894	2.02878	2.99161	3.96897	3.55542	3.0599	2.82933	3.80208	2.99879	Tumor	BRCA
TCGA-BH-A1FG-01A	3.71029	2.1228	2.67778	1.94347	2.87794	3.86629	4.05105	3.51237	2.83862	2.59502	3.20509	4.39409	2.89385	2.90323	3.23359	3.70078	3.24925	Tumor	BRCA
TCGA-BH-A0DV-01A	3.39238	2.22215	2.49099	2.21071	2.54392	3.43197	3.84092	3.15437	2.22828	2.39191	2.75606	3.82354	2.87342	3.04165	2.74729	3.75199	2.81197	Tumor	BRCA
TCGA-UL-AAZ6-01A	4.4525	2.4247	2.09579	3.25201	1.68932	4.14913	3.9096	3.40885	2.60377	2.27535	2.9689	3.15497	2.90828	2.79874	2.88273	3.10444	4.1789	Tumor	BRCA
TCGA-AR-A255-01A	3.65665	2.53289	2.59424	2.17987	2.85714	3.4227	4.55294	3.93366	3.1642	2.58555	3.11389	4.21088	3.5725	2.91316	3.38069	4.12164	3.62635	Tumor	BRCA
TCGA-LD-A7W6-01A	4.77232	2.78324	3.06482	3.08678	2.5614	3.5421	3.90481	4.0708	3.65342	2.46092	3.32764	4.03021	4.0651	3.06674	3.30401	3.9197	3.29458	Tumor	BRCA
TCGA-AR-A24Z-01A	4.61858	2.52856	3.3854	2.27019	3.17624	3.48552	4.75309	4.1396	2.89603	2.6085	3.77566	5.52621	3.88473	3.08774	3.55242	3.86436	3.25767	Tumor	BRCA
TCGA-A1-A0SO-01A	3.18523	3.01712	3.37127	2.70924	2.62805	5.8434	4.66771	4.25824	3.03348	3.06056	3.83377	4.98664	3.655	3.39954	3.84813	3.40858	3.74686	Tumor	BRCA
TCGA-A2-A3XS-01A	5.15507	2.29174	2.92335	3.25216	2.06563	4.20398	4.07577	3.74158	2.53741	2.34741	2.96224	3.49536	3.8805	3.40438	3.20891	2.75952	3.33235	Tumor	BRCA
TCGA-D8-A1X6-01A	3.88708	2.51629	2.94771	2.47428	3.12197	3.91709	4.13577	3.69443	3.0785	2.42087	3.60956	4.43506	3.63631	3.77307	3.48341	3.50583	3.25684	Tumor	BRCA
TCGA-BH-A0HF-01A	3.35395	2.47089	2.75229	2.76267	2.5864	3.75503	4.41562	3.36114	2.75956	2.61469	2.88249	3.92857	2.89701	4.53524	2.88753	3.67541	2.9659	Tumor	BRCA
TCGA-A7-A3J0-01A	4.21188	2.51694	2.6673	2.58279	2.76977	3.63959	3.95309	3.57219	3.02621	2.6343	2.74218	3.9878	4.41918	2.73403	3.43871	3.48897	2.93575	Tumor	BRCA
TCGA-AC-A23C-01A	3.47891	2.61391	3.13215	2.47199	2.94709	4.08073	4.71288	3.99489	3.12441	2.80195	3.6147	4.4202	2.64585	3.56624	4.08314	3.23134	2.61293	Tumor	BRCA
TCGA-LL-A442-01A	3.61277	2.79124	3.1549	2.56308	2.71026	3.01832	4.53995	3.85148	4.04639	2.24831	3.69592	4.25598	3.29835	3.84291	3.17789	3.69989	2.95488	Tumor	BRCA
TCGA-S3-A6ZH-01A	3.99673	2.7082	3.13511	3.27606	3.14081	3.81292	5.7241	4.06083	2.85396	2.09285	3.5991	4.40117	4.21821	4.28039	3.75859	4.35415	3.53629	Tumor	BRCA
TCGA-AC-A8OR-01A	4.50709	2.71001	2.90244	2.99767	2.27935	3.71207	4.29221	3.7509	3.00481	2.25433	2.9412	3.83083	3.92048	2.92	2.72469	3.39945	3.28221	Tumor	BRCA
TCGA-AR-A1AX-01A	4.8426	2.63301	2.85989	2.63036	2.47031	3.63533	4.13769	3.75409	3.16099	2.56602	3.34475	3.74466	4.05856	3.57194	3.30543	3.94945	2.92244	Tumor	BRCA
TCGA-D8-A1XO-01A	3.64015	2.50843	2.49949	2.26036	2.51825	3.89893	4.42646	3.76675	3.30107	2.74151	3.37752	3.81948	3.15845	3.28187	2.95264	4.11655	3.28765	Tumor	BRCA
TCGA-E9-A1R2-01A	5.46324	2.54551	2.88973	2.78628	2.43354	3.9738	4.93864	4.10358	2.69406	2.56055	3.36777	3.715	4.18453	3.42047	3.3626	4.08502	3.70594	Tumor	BRCA
TCGA-D8-A27M-01A	4.93039	2.47829	3.03366	2.98022	2.95323	3.01985	4.87542	3.76915	3.17434	2.51536	2.92636	4.29162	3.19762	3.22787	2.92695	3.57933	2.52123	Tumor	BRCA
TCGA-AN-A0FY-01A	4.7271	2.59064	3.21597	2.67195	2.42358	3.91815	5.22028	4.39214	3.231	3.02777	3.27031	3.81645	3.64568	3.88361	3.62937	3.54715	6.22994	Tumor	BRCA
TCGA-BH-A0DX-01A	3.56414	2.41682	2.6544	1.99334	2.6226	3.8049	4.58671	3.69713	2.76288	2.44585	3.22042	4.04877	2.78031	3.19416	2.93071	3.65822	3.01045	Tumor	BRCA
TCGA-EW-A1IY-01A	2.58988	2.41467	2.47124	1.79651	3.55977	4.46402	4.33397	3.92323	2.84911	2.27471	3.44976	5.11792	2.44049	2.66813	3.45418	3.69039	3.72977	Tumor	BRCA
TCGA-A2-A04N-01A	4.87038	2.46282	2.81122	2.25472	2.54073	3.70046	3.79926	3.85415	3.10129	2.36938	3.63335	4.20975	3.45161	3.06415	3.02336	3.81826	2.91353	Tumor	BRCA
TCGA-A2-A0YF-01A	3.18687	2.45873	3.11966	1.97479	2.96778	4.11982	3.96502	4.00011	2.99118	2.58474	3.43693	4.65981	3.09781	2.97115	3.29638	3.9598	3.56501	Tumor	BRCA
TCGA-PE-A5DE-01A	4.05065	2.79931	2.5912	2.93323	2.72117	3.65794	4.03293	3.82915	3.0117	2.38392	3.16771	4.16894	3.86781	3.60392	2.84718	3.62859	3.21868	Tumor	BRCA
TCGA-BH-A1FN-11A	2.81776	2.52672	2.6852	2.59363	2.43856	3.7018	4.75724	3.85546	3.21464	3.04653	3.51773	4.34076	2.64471	2.37379	2.93185	3.80377	3.46002	Normal	BRCA
TCGA-EW-A1J5-01A	4.11897	2.76902	3.26336	2.68063	3.10866	3.71711	4.32674	4.062	3.18005	2.42817	3.82265	4.56698	3.74223	3.51195	3.56473	3.93018	3.74158	Tumor	BRCA
TCGA-AO-A0JE-01A	3.6115	2.47952	3.27023	1.86024	2.99802	4.08284	4.01095	3.39989	3.04235	2.62941	3.76424	4.00446	2.6563	3.61678	3.52287	4.21966	3.34291	Tumor	BRCA
TCGA-BH-A1FN-01A	3.25035	2.55041	2.83053	2.34943	2.62338	4.06413	4.86298	3.87104	2.75749	2.73914	3.71434	4.69573	3.07833	3.1685	3.79479	3.49587	3.29102	Tumor	BRCA
TCGA-BH-A18V-01A	4.12737	2.77949	2.63962	2.726	3.57718	3.82752	5.18658	3.97086	2.70376	2.67213	3.40821	4.19575	3.70083	3.5772	3.22691	3.707	3.38171	Tumor	BRCA
TCGA-AC-A23H-11A	2.79146	2.31258	2.4526	2.18519	2.4675	3.30298	4.74518	3.51723	2.82639	2.4044	3.0612	4.09365	2.4926	2.28172	2.65847	3.45081	3.1729	Normal	BRCA
TCGA-BH-A0BF-01A	4.04809	2.3738	2.78002	2.5897	2.48031	3.66431	4.13875	3.69341	2.99016	2.41336	3.28718	3.97458	3.36387	3.27167	2.823	3.80439	3.33482	Tumor	BRCA
TCGA-B6-A409-01A	5.14659	2.63799	3.36746	3.18401	2.11377	4.43156	4.71076	3.61742	2.048	2.62837	2.96563	3.41707	3.13883	3.43624	2.79716	3.74142	2.8072	Tumor	BRCA
TCGA-A2-A0CL-01A	3.71485	2.86259	2.73699	2.78695	2.8368	3.89823	5.86596	3.73611	3.10925	2.4665	3.28387	4.10778	3.27523	3.12762	3.13023	4.0155	3.81489	Tumor	BRCA
TCGA-A2-A0CO-01A	4.03934	2.48403	2.63404	2.9171	2.42411	3.07733	3.73812	3.46298	3.03709	2.36483	3.28192	3.74237	3.80137	2.88888	2.54809	3.92429	2.862	Tumor	BRCA
TCGA-E2-A158-11A	3.46565	2.43787	2.35147	2.47688	2.20597	3.41084	4.13619	2.97218	2.86207	2.10526	2.94921	3.547	2.81215	2.51762	2.296	3.31136	2.37457	Normal	BRCA
TCGA-AC-A3QP-01A	4.70261	2.40395	2.69982	3.05876	2.121	3.71269	3.28772	3.4709	2.31145	2.90599	2.92371	3.55404	3.93276	3.08376	2.86076	3.34615	2.96086	Tumor	BRCA
TCGA-AC-A2QJ-01A	5.11579	2.05704	1.70139	3.52671	1.4676	3.16345	2.29167	2.18273	0.983127	1.95276	1.5295	2.29177	3.73589	2.46413	2.3123	1.97141	2.49831	Tumor	BRCA
TCGA-B6-A0RM-01A	4.97355	2.48215	2.83883	2.66717	2.75873	3.64539	3.84091	3.84464	3.43168	2.52886	3.68642	4.18375	3.82397	3.3097	3.06034	3.85716	3.15932	Tumor	BRCA
TCGA-D8-A1JS-01A	3.63466	2.06596	2.82852	3.12685	2.42677	4.04653	3.43972	3.54564	2.60945	3.09921	2.56481	3.77661	3.33529	3.48249	3.32844	3.69325	3.20548	Tumor	BRCA
TCGA-E9-A1RB-11A	3.05063	2.43187	2.53761	2.57315	2.49998	3.30683	4.5199	3.46496	3.25671	2.37056	3.24094	4.11464	2.75259	2.63825	2.55039	3.77597	2.85101	Normal	BRCA
TCGA-A7-A26J-01A	3.68547	2.61665	3.22436	2.64634	3.09942	4.10414	4.36146	4.41537	3.57328	3.09433	3.41284	4.33825	3.03649	3.42609	3.31537	3.60536	3.94409	Tumor	BRCA
TCGA-A7-A13H-01A	4.47488	2.8024	2.86515	3.02355	2.39041	3.39227	3.68296	3.83768	3.04184	2.78574	3.66861	3.89817	3.61988	3.60764	2.86905	3.98176	3.18552	Tumor	BRCA
TCGA-AO-A126-01A	3.73339	2.31372	2.24551	2.65351	2.1792	3.66397	3.15147	3.17925	2.04147	1.67731	2.81595	3.74176	2.89749	2.06811	3.26893	3.35277	3.24303	Tumor	BRCA
TCGA-BH-A6R8-01A	4.62642	2.44832	2.42994	3.1656	2.25277	3.69441	3.65244	3.27559	2.67013	2.74647	3.25376	3.75116	3.59719	4.10061	3.02577	3.6688	4.02651	Tumor	BRCA
TCGA-A7-A0DB-01C	3.32846	3.41521	2.6995	2.40016	3.56301	2.95931	4.41969	5.12238	4.74018	1.29958	4.37148	5.52372	3.34732	2.43612	3.69379	3.659	3.37762	Tumor	BRCA
TCGA-AC-A3TM-01A	4.972	2.52292	2.39226	3.54166	2.1246	3.86398	2.88376	3.0575	2.0172	2.34957	2.43232	3.04942	3.95097	3.12114	2.95566	3.11108	3.24415	Tumor	BRCA
TCGA-AR-A0TQ-01A	4.32692	2.64159	2.93236	2.74369	3.05979	3.75019	4.597	3.96422	3.07256	2.34568	3.06478	4.25696	4.52098	3.49171	3.43608	3.69311	5.08227	Tumor	BRCA
TCGA-GM-A2DH-01A	3.6309	3.06071	3.41502	3.12903	3.25811	4.21396	5.26969	4.31463	3.22413	2.82293	3.38605	4.75722	3.5632	3.96541	4.20342	4.68991	2.70154	Tumor	BRCA
TCGA-B6-A0RI-01A	3.52379	2.53502	3.3021	2.68433	2.66936	3.85331	3.67231	3.57442	2.86873	2.22789	3.33505	4.11607	3.40401	3.52527	3.0843	3.88937	3.03057	Tumor	BRCA
TCGA-A2-A1G0-01A	4.23597	2.50945	3.23998	2.55812	2.78113	3.51156	4.08167	3.78714	3.09421	2.17712	3.41871	4.06594	3.67275	2.9248	3.17586	3.65991	3.3601	Tumor	BRCA
TCGA-A2-A1FX-01A	4.59868	2.32171	3.27726	3.08683	2.99033	3.6558	4.32907	3.93919	2.77095	1.99815	3.39223	4.43239	3.41208	3.52291	3.69603	3.98356	3.5399	Tumor	BRCA
TCGA-A7-A26G-01A	3.04178	2.25096	2.32519	1.82732	2.55996	3.18066	4.77017	3.75809	2.98441	2.8476	3.2967	4.18051	2.03578	3.21966	3.02663	3.44758	3.10813	Tumor	BRCA
TCGA-E2-A1LI-01A	4.56647	2.67008	3.19886	3.15578	2.68601	4.38103	4.9406	4.00005	3.04477	5.00238	3.5072	4.19689	3.42763	3.23703	3.86846	1.33694	3.59954	Tumor	BRCA
TCGA-A8-A08P-01A	4.71043	2.61758	3.25415	2.66987	3.02142	4.05363	4.30439	4.10824	3.01948	3.04273	3.78831	4.2959	3.56234	3.45224	3.44652	3.74776	4.08159	Tumor	BRCA
TCGA-E2-A1IN-01A	3.60567	2.27158	2.76625	2.46468	2.74866	3.61718	4.4448	3.8761	2.95489	2.72114	3.32963	4.04912	3.22383	3.11675	3.1858	3.40268	3.89511	Tumor	BRCA
TCGA-BH-A0HA-01A	3.33988	2.34843	2.90817	2.35708	2.37433	3.90694	4.15823	3.37676	2.77675	2.52475	2.85113	3.86046	3.15353	2.92257	3.04636	3.67125	3.10965	Tumor	BRCA
TCGA-AO-A1KR-01A	4.02475	2.37765	2.3782	3.22888	1.93123	4.76358	2.88657	3.57092	2.32981	2.16081	2.6979	3.46579	4.04587	2.92788	3.31075	2.89385	2.70069	Tumor	BRCA
TCGA-3C-AALK-01A	4.23767	2.54593	2.83682	2.62559	2.27354	3.4027	3.4978	3.63042	2.56011	2.14901	3.15385	3.75909	3.61445	3.65889	3.29536	3.76377	2.7346	Tumor	BRCA
TCGA-BH-A0BV-01A	4.27826	2.3778	3.00074	2.50885	3.02721	3.42286	4.53773	3.6182	2.6547	1.82555	3.36275	4.65118	3.45853	4.00863	3.14567	3.60403	2.93304	Tumor	BRCA
TCGA-E2-A1IH-01A	2.81779	2.36934	1.91838	2.41348	2.57509	4.07881	4.34876	4.10685	2.17631	2.2523	3.08725	4.22721	2.60897	2.86405	3.22612	4.02678	3.2612	Tumor	BRCA
TCGA-XX-A89A-01A	4.9591	2.40775	2.70842	2.79931	2.31832	3.03512	3.59499	3.74857	2.50074	2.25723	2.9561	3.69912	3.26139	2.74116	2.78813	3.46506	2.68323	Tumor	BRCA
TCGA-E9-A1RH-01A	3.08692	2.68992	3.56089	2.32496	4.33458	4.95123	5.14478	3.60578	2.70329	2.3852	3.53394	4.84453	2.69773	3.74405	2.65721	3.92174	3.43946	Tumor	BRCA
TCGA-A8-A085-01A	3.82168	1.92042	2.89525	2.73442	2.88702	3.53085	4.30516	3.79022	3.22942	2.68696	3.26917	4.07687	3.57283	4.20736	3.21723	3.72246	3.63347	Tumor	BRCA
TCGA-E9-A1N3-01A	3.91205	2.56482	3.01534	2.55205	2.81596	3.57371	4.25047	3.85385	3.16434	2.27846	3.3318	4.34876	3.28899	3.53681	3.48505	3.77052	3.15741	Tumor	BRCA
TCGA-BH-A1EW-11B	3.57381	2.53419	3.01809	2.43821	2.96092	3.77651	4.84833	5.26664	3.70168	2.49075	3.90267	4.30185	2.81157	3.00303	3.32555	4.02205	3.23688	Normal	BRCA
TCGA-D8-A13Y-01A	4.94883	2.32531	2.50951	3.28202	3.14485	4.29842	4.48391	4.33685	4.05312	2.90644	3.87933	4.72762	2.71656	3.93843	3.40799	4.36311	4.26329	Tumor	BRCA
TCGA-AO-A0JB-01A	4.6344	1.6294	1.61461	1.99582	1.54935	2.41552	2.77249	2.40254	2.12004	1.60819	2.02579	3.10591	3.29658	2.08799	1.77556	2.12162	1.68652	Tumor	BRCA
TCGA-AC-A6IV-01A	4.0853	2.70053	2.68548	2.86641	2.42862	3.42815	3.81648	3.79774	2.78843	2.38436	3.40484	3.87839	3.80765	3.06792	3.06448	3.72046	2.89169	Tumor	BRCA
TCGA-A8-A09M-01A	5.00162	2.56627	2.84154	2.67654	2.16275	3.47988	4.58482	3.84883	2.6517	2.53947	3.23822	3.80872	2.94971	3.04583	3.46058	3.64923	3.86142	Tumor	BRCA
TCGA-BH-A0GY-01A	5.04597	2.36829	3.27719	2.59407	3.10734	3.98098	4.11522	3.86546	3.04905	2.85822	3.74307	4.3927	3.73595	3.70879	3.82428	2.6407	3.30102	Tumor	BRCA
TCGA-AR-A2LL-01A	4.8389	2.66144	3.20652	2.75614	2.83308	3.60737	4.07189	4.11663	3.68132	2.23936	3.3151	4.41537	3.76003	3.32334	3.4508	3.22022	3.31522	Tumor	BRCA
TCGA-BH-A208-01A	2.78713	1.95554	2.563	1.78237	2.0924	3.2126	3.84426	2.95293	2.04265	2.18339	2.48879	3.94133	2.79601	2.61703	2.14451	3.05659	2.68797	Tumor	BRCA
TCGA-E2-A15I-11A	2.5095	2.17554	2.13655	2.40053	2.15265	3.31036	4.28662	3.063	2.91543	1.89212	3.07299	3.61385	2.33693	1.7943	2.04791	3.25301	2.50783	Normal	BRCA
TCGA-EW-A1PE-01A	3.57469	2.47319	2.78173	2.31449	3.02886	3.35806	3.87477	3.56811	3.24277	2.47736	3.10084	4.32561	3.62601	3.31936	2.95503	3.95156	3.02167	Tumor	BRCA
TCGA-AO-A125-01A	3.63366	2.43476	2.79015	2.88084	2.44742	3.9448	3.21226	3.75606	3.28166	2.13918	3.76273	4.02709	3.20659	2.47153	3.35663	2.86897	3.10605	Tumor	BRCA
TCGA-E2-A1B1-01A	3.19679	2.62777	3.21346	2.13479	3.07383	3.94089	4.82694	3.82865	3.35853	2.57196	3.55007	4.34565	3.06175	3.01052	3.3619	3.92353	3.34756	Tumor	BRCA
TCGA-BH-A0C0-01A	5.09864	2.70865	2.97109	2.58784	2.81308	4.39379	3.62688	4.02538	2.84784	3.21606	3.34862	4.39554	3.24448	4.06292	3.64499	4.0375	3.74214	Tumor	BRCA
TCGA-A7-A26I-01B	4.59602	3.07213	2.77559	3.67048	2.24349	3.74697	3.34176	3.49344	3.71335	2.05533	3.56555	3.89911	4.26702	3.27677	2.94082	3.3748	2.31041	Tumor	BRCA
TCGA-AO-A0JJ-01A	3.45602	2.46464	2.85471	2.59567	2.90949	3.79173	4.41412	3.75662	3.07413	2.18054	2.98567	4.03488	2.99378	3.33123	3.06866	4.03555	3.14873	Tumor	BRCA
TCGA-AR-A2LH-01A	4.5922	2.63792	2.70911	3.16682	2.60507	3.64256	3.77896	3.53394	2.64864	2.42075	3.13777	3.94113	3.3043	3.53541	3.12684	3.98776	2.93362	Tumor	BRCA
TCGA-A2-A3XW-01A	4.37422	2.56318	2.38079	3.32667	1.47848	3.21646	3.16828	2.74153	2.4026	2.67401	2.63246	2.62817	4.11392	2.64646	2.14107	3.1862	3.03524	Tumor	BRCA
TCGA-AR-A0TS-01A	4.4806	2.56189	3.35323	2.41829	2.9186	4.77219	4.94697	3.88906	3.16242	2.83008	3.61169	4.60978	3.38764	4.20238	3.11228	3.39247	3.46343	Tumor	BRCA
TCGA-BH-A0AV-01A	3.55197	2.84402	2.93614	1.81856	2.4328	3.25256	4.29564	3.70797	2.63006	2.31422	3.25907	3.98852	2.61328	3.44723	2.52422	3.23086	2.7657	Tumor	BRCA
TCGA-A8-A07B-01A	4.71474	2.43734	2.73157	2.45871	2.92558	3.08464	4.10494	3.98185	3.09226	2.469	2.82195	4.69536	3.56242	2.78489	3.62241	3.62674	3.02171	Tumor	BRCA
TCGA-LL-A73Z-01A	4.82684	2.57466	2.6421	3.0249	2.3408	3.82045	3.89217	3.49151	2.76725	2.8111	2.83291	3.90598	3.63502	3.15741	3.02367	3.90292	3.6657	Tumor	BRCA
TCGA-BH-A0BA-11A	3.70117	2.46291	2.57265	2.74153	2.63641	3.34163	4.68571	3.56111	3.15805	2.36098	2.92431	4.04571	3.27101	2.96603	2.73269	3.91246	2.99244	Normal	BRCA
TCGA-BH-A0B3-11B	4.00658	2.80012	2.76849	2.83589	2.3622	3.53186	4.91158	4.03946	3.62706	2.91582	3.50815	4.27141	3.45196	3.12312	2.99627	4.03894	3.09504	Normal	BRCA
TCGA-B6-A402-01A	5.33397	2.65337	2.98335	3.60346	2.8303	4.32377	4.20208	4.16111	2.81855	2.64502	3.60044	4.65662	3.39559	2.8622	2.8666	3.24302	3.79492	Tumor	BRCA
TCGA-AR-A0TT-01A	3.46726	2.81566	3.13926	2.59208	2.77463	3.59227	4.45311	4.2644	3.37785	2.73224	3.33797	4.16358	3.88623	3.05718	3.20013	3.74919	3.27577	Tumor	BRCA
TCGA-EW-A6SB-01A	4.39172	2.54233	2.7748	3.59277	2.00036	4.14381	4.41804	3.93321	2.44564	3.48934	3.1128	3.70667	3.75617	3.29572	3.12494	3.46429	3.26602	Tumor	BRCA
TCGA-AC-A2FB-01A	3.37603	2.50341	2.99345	2.43592	2.76937	3.58055	4.16443	3.7154	2.73311	2.45187	3.16808	4.25276	3.44992	3.02523	3.16443	3.79387	3.26663	Tumor	BRCA
TCGA-AC-A62V-01A	5.09367	2.1595	1.48406	2.99793	2.04608	3.80375	3.77776	2.92866	1.8074	2.49221	2.34053	3.28715	3.26427	3.35689	3.07271	3.17881	4.1773	Tumor	BRCA
TCGA-D8-A1XQ-01A	4.84004	2.8145	3.47375	2.99385	2.99599	4.5144	5.18041	3.85361	3.36361	3.62849	3.61939	4.62423	3.37952	1.85643	2.99665	3.61408	3.17078	Tumor	BRCA
TCGA-BH-A0DD-01A	5.0471	2.64476	2.94727	3.21886	3.40354	4.1283	4.67256	4.20287	3.27696	1.90527	3.26319	4.50372	3.90081	3.85033	3.90494	4.08235	3.54847	Tumor	BRCA
TCGA-Z7-A8R6-01A	5.19064	2.62681	3.09181	3.24589	2.98037	4.04867	3.64537	3.94668	2.4193	1.83027	3.51089	4.33489	3.73912	3.76321	3.70513	3.28822	3.57058	Tumor	BRCA
TCGA-OL-A5DA-01A	5.02896	2.89968	2.78371	2.95246	2.36841	3.38062	3.56667	3.85716	2.3787	2.02755	3.25936	4.32412	3.66842	2.9164	3.33317	3.75985	3.28571	Tumor	BRCA
TCGA-WT-AB41-01A	3.87851	2.80361	2.20475	3.53351	1.90957	4.04197	3.39156	2.94082	2.42867	2.43937	2.23536	2.7424	3.65835	3.46112	2.74558	3.26737	3.27621	Tumor	BRCA
TCGA-E2-A1LA-01A	4.24636	2.4442	3.02398	2.63616	2.57307	3.67169	3.68559	3.68261	2.92299	2.3648	2.86818	4.06224	3.75789	3.72435	3.12914	3.72698	3.2737	Tumor	BRCA
TCGA-AR-A24N-01A	4.35169	2.52876	3.01724	2.04928	3.34094	3.8377	4.62536	3.74701	3.12933	1.94612	3.48213	4.32361	3.20048	3.30843	3.71181	3.63674	3.02012	Tumor	BRCA
TCGA-E9-A3QA-01A	5.09188	2.56221	2.92232	3.26004	2.32695	3.80794	4.56284	3.72635	2.34666	3.30961	3.11944	3.40771	3.63655	3.29055	3.4578	2.5526	3.61286	Tumor	BRCA
TCGA-BH-A0DO-11A	3.79236	2.7354	2.75888	2.50733	2.29161	3.38366	4.78203	3.98831	3.42912	2.71508	3.45698	4.17602	3.10431	2.75371	2.79424	3.85782	3.30749	Normal	BRCA
TCGA-E2-A15J-01A	4.61317	2.53641	3.00215	2.52287	2.96389	3.77178	3.59708	3.99076	2.74161	2.43967	3.38539	4.35905	3.52625	3.51401	3.24364	3.73521	3.0673	Tumor	BRCA
TCGA-LL-A73Y-01A	4.46012	3.25137	2.74028	2.17025	2.4777	3.0647	4.25877	3.77497	2.76389	2.42917	3.02944	3.93013	3.56322	2.799	3.09408	3.58608	2.98259	Tumor	BRCA
TCGA-A2-A4RY-01A	4.70051	2.85853	2.78559	3.24712	2.42781	3.33483	3.979	4.11618	3.26505	1.95063	3.18548	3.95788	4.04418	2.97399	3.13884	3.7513	2.8795	Tumor	BRCA
TCGA-D8-A1XU-01A	3.40703	2.55247	2.53796	1.68717	2.23768	3.69127	4.47666	3.56763	2.98378	1.82727	3.37142	3.85463	3.46133	3.21192	2.6264	3.05578	3.51263	Tumor	BRCA
TCGA-E2-A1LS-11A	2.55341	2.32093	2.37615	2.54477	2.17262	3.48379	3.75147	2.71074	3.05107	2.07107	3.00466	3.63837	2.4052	2.15678	2.33313	3.48489	2.23311	Normal	BRCA
TCGA-AN-A0FJ-01A	4.67202	2.70497	2.42794	2.679	2.37939	4.40997	4.75985	4.21025	2.8802	3.48453	3.24473	3.85947	3.0343	3.46414	4.19556	3.25152	2.52926	Tumor	BRCA
TCGA-BH-A0DK-01A	3.78827	2.44127	3.35866	2.4758	2.574	3.6221	3.75495	3.31126	2.4334	1.89757	3.05112	4.01406	3.15703	3.781	2.70669	3.89888	3.08998	Tumor	BRCA
TCGA-B6-A0IJ-01A	5.8741	3.14084	3.42947	3.10289	2.43704	3.49915	4.4212	4.51523	3.04746	2.64034	2.83581	3.96558	3.66124	3.29826	3.09251	4.18667	3.17112	Tumor	BRCA
TCGA-LL-A7SZ-01A	5.88659	2.21732	2.125	3.24348	1.91354	3.35205	3.00775	2.9449	2.16531	2.45105	2.42434	3.03981	4.07236	3.74625	3.20698	3.17272	3.1551	Tumor	BRCA
TCGA-C8-A26Y-01A	3.55236	2.19085	3.02861	3.11378	3.03835	4.94575	4.06329	3.64362	2.3248	1.97687	3.25997	4.19384	3.27897	3.80412	3.1346	2.82072	3.76406	Tumor	BRCA
TCGA-GI-A2C9-11A	3.48961	2.55133	2.99628	2.83097	2.40545	3.25401	4.43636	3.78507	3.86554	2.32378	3.69472	4.1303	3.14289	2.70281	2.85027	3.78855	2.92492	Normal	BRCA
TCGA-BH-A0BQ-11A	3.76378	2.63737	3.00604	2.57785	2.46638	3.59549	4.72779	4.00162	3.25362	1.99783	3.23406	4.26284	3.17895	2.8571	3.07127	3.50888	3.17658	Normal	BRCA
TCGA-A8-A06R-01A	4.75669	2.91454	2.86047	2.8394	2.64895	4.11126	4.15175	4.01764	3.05041	2.40331	3.55082	4.38961	3.20909	3.78034	2.91024	3.28826	3.52278	Tumor	BRCA
TCGA-AO-A128-01A	4.81618	2.74343	2.85962	3.36948	2.96814	4.07643	4.23859	3.69708	2.77049	2.62147	3.1232	4.35693	4.13743	4.11423	2.94135	3.91837	3.20885	Tumor	BRCA
TCGA-E2-A1BC-01A	3.06922	2.68561	2.80852	1.77117	2.93902	3.88747	4.17312	3.85519	3.52926	2.91381	3.64208	4.25762	3.05983	3.42587	3.21772	4.14623	3.39941	Tumor	BRCA
TCGA-A7-A0CE-11A	3.74666	2.61121	2.74162	2.98124	2.30626	3.64151	4.27012	3.35995	2.90072	2.71503	3.32916	3.84523	3.34917	3.10317	3.00012	3.78315	2.96509	Normal	BRCA
TCGA-B6-A0I6-01A	5.79197	2.35525	3.40725	3.10234	3.03644	3.45565	4.43927	4.1922	2.8271	2.43524	3.60142	4.122	3.73015	3.63764	3.36077	3.75365	3.3822	Tumor	BRCA
TCGA-BH-A1ET-01A	3.24279	2.57315	2.7464	2.09879	3.23231	3.97844	5.96577	3.86754	3.38168	2.55569	3.67294	4.57912	2.92183	3.19197	3.15109	3.92194	3.11982	Tumor	BRCA
TCGA-A2-A04V-01A	3.95885	2.43037	3.04977	2.48934	2.58964	3.62099	3.61745	3.87367	2.19642	2.17922	3.55901	4.29847	3.04288	3.03573	2.98712	3.71171	3.24717	Tumor	BRCA
TCGA-A7-A2KD-01A	4.11343	2.87234	3.25905	2.66114	2.85313	3.71624	4.49828	4.00235	3.61267	2.47268	3.42772	4.22088	3.24464	3.99131	3.47668	4.25317	3.458	Tumor	BRCA
TCGA-A7-A0CE-01A	4.19906	2.32703	3.16098	3.0444	3.09669	4.7481	4.87505	3.88409	2.53647	2.60665	3.41092	4.29911	3.2785	3.93308	3.03049	4.16589	3.46965	Tumor	BRCA
TCGA-D8-A1JE-01A	2.44907	2.37442	2.44367	1.56672	3.19739	4.00419	4.68634	3.85883	2.88936	2.06153	3.38679	4.62972	2.69106	3.34702	2.91487	3.98807	3.6755	Tumor	BRCA
TCGA-B6-A0WX-01A	4.10172	2.56416	2.35705	2.69176	2.34851	4.1507	4.55284	3.99954	2.34333	2.61138	3.23158	3.78563	2.75681	2.89853	2.90076	3.12259	3.2939	Tumor	BRCA
TCGA-A7-A4SB-01A	3.93727	2.47936	3.16509	3.34535	2.07803	3.09676	3.95418	4.17708	2.24466	2.01481	3.29895	3.64722	3.55576	3.19324	3.33558	3.06117	2.91858	Tumor	BRCA
TCGA-EW-A1J1-01A	3.80112	2.44664	2.58573	2.16427	2.63644	3.32845	4.91441	4.02224	3.0938	2.80152	3.56473	4.60514	3.66013	3.42953	3.45427	3.82452	3.07958	Tumor	BRCA
TCGA-A2-A0YM-01A	4.81204	3.01205	3.06891	2.33347	3.01658	4.21461	5.09741	4.16935	2.72405	2.62966	3.45515	4.48764	3.0446	3.78691	3.29488	3.70496	3.19896	Tumor	BRCA
TCGA-A8-A0A4-01A	4.29814	2.37224	3.08422	2.80528	2.72697	3.99305	4.15433	3.61544	3.23452	2.61262	3.31253	4.01925	3.98124	3.51193	3.16354	4.20665	3.48892	Tumor	BRCA
TCGA-A2-A0EM-01A	3.14337	2.66353	2.76254	2.67594	3.02089	3.93255	3.87521	3.98876	3.13906	2.88332	3.0096	4.02022	3.0398	3.60286	3.2281	4.00731	3.41852	Tumor	BRCA
TCGA-AR-A24X-01A	3.77829	2.64158	3.14918	2.55128	3.12743	4.29332	4.18732	4.33768	3.22343	2.63976	3.90702	4.49622	3.31661	3.6336	3.5752	4.24231	3.05627	Tumor	BRCA
TCGA-C8-A132-01A	4.31818	2.69332	3.18897	2.37337	2.55337	4.10607	4.49632	3.97218	2.98012	1.98982	3.26144	4.02598	3.59165	3.50437	4.05584	3.65048	3.2044	Tumor	BRCA
TCGA-AN-A049-01A	4.31034	2.82637	2.41117	1.87478	2.95116	4.01109	3.71904	3.66773	3.51077	2.40015	3.10931	4.26019	3.79999	3.68381	3.17522	3.7043	2.87242	Tumor	BRCA
TCGA-A2-A0SY-01A	3.69049	2.49536	2.78798	2.57402	2.62996	3.7134	4.06988	3.7623	2.93375	2.15426	2.7432	4.13025	3.05951	2.93153	3.03437	3.92192	3.04567	Tumor	BRCA
TCGA-B6-A0RU-01A	3.44506	2.49396	2.64804	2.79707	3.47872	4.3747	5.4224	3.87014	2.70343	3.07157	3.26007	4.35549	3.40528	4.05618	3.58453	3.56238	4.06804	Tumor	BRCA
TCGA-AR-A0TX-01A	3.57002	2.39343	2.88215	2.40408	2.6997	3.99225	4.45205	3.88417	3.00382	2.49113	2.8445	4.31527	3.6265	3.15375	3.30553	3.66296	4.13318	Tumor	BRCA
TCGA-BH-A0HQ-01A	4.19046	2.45968	2.5846	2.59023	2.29806	3.47045	3.67343	3.71132	2.82604	2.57317	3.33448	3.79127	3.58113	3.65592	2.6284	3.71683	3.28167	Tumor	BRCA
TCGA-E2-A15C-01A	4.90169	2.52656	2.83888	2.29194	2.93353	3.72385	4.12795	3.83408	3.3115	2.61107	3.78829	4.28264	3.66891	3.36201	2.94054	3.62578	3.52259	Tumor	BRCA
TCGA-AQ-A54N-01A	4.25158	2.57212	2.77822	3.39183	1.58155	4.95197	3.21977	3.53211	2.47176	2.1414	2.34953	3.49692	4.11568	2.84969	3.82038	0.203799	3.05518	Tumor	BRCA
TCGA-A8-A07I-01A	4.0685	2.74912	3.4661	1.79064	3.15724	3.62099	4.24526	3.53444	3.04719	2.53353	3.63638	4.52858	3.90788	3.49698	3.48167	4.0734	3.13389	Tumor	BRCA
TCGA-B6-A1KI-01A	3.385	2.28207	2.6937	2.57288	2.36923	3.4467	3.9704	3.65686	3.03584	2.91901	3.24538	3.80377	3.17809	3.59344	3.10595	3.65096	3.55753	Tumor	BRCA
TCGA-B6-A0RH-01A	3.82748	2.32652	2.18057	2.26539	2.29784	3.91616	2.94032	3.60884	2.32589	2.53885	2.86001	4.05922	3.25875	2.73386	3.57041	3.43884	3.60246	Tumor	BRCA
TCGA-BH-A5IZ-01A	4.23037	2.37186	2.19504	3.01401	2.19235	4.11216	4.05131	3.63349	1.82377	2.95209	3.44594	3.69406	3.14072	3.7583	3.1205	3.27136	3.1875	Tumor	BRCA
TCGA-AN-A0XU-01A	4.0705	2.96308	3.07857	2.48255	2.97088	4.74617	5.30237	4.0743	3.25612	2.70172	4.05635	5.10818	3.39247	3.96542	3.84747	2.89668	3.54683	Tumor	BRCA
TCGA-LD-A74U-01A	4.48681	2.68009	2.67535	2.99449	2.33285	3.30774	3.85579	3.63446	3.25632	2.39235	3.00929	3.78762	3.68854	3.22849	2.92659	3.47582	3.18119	Tumor	BRCA
TCGA-B6-A401-01A	5.36037	2.30007	2.40228	3.25494	2.3226	3.3996	4.10675	3.52756	3.01312	2.31023	2.97955	3.69916	3.53704	3.23622	2.94186	2.93411	3.11916	Tumor	BRCA
TCGA-PL-A8LV-01A	5.12623	2.37531	2.24795	3.77715	1.87926	4.36168	3.77022	3.55618	2.20594	3.96719	2.69424	3.5921	3.39353	3.20908	3.21388	3.68693	2.40794	Tumor	BRCA
TCGA-BH-A0C3-11A	4.1824	2.64869	2.66025	2.77073	2.28262	3.42739	4.60458	4.0917	3.29663	2.54855	3.44033	4.07387	3.3255	2.91504	3.07057	3.46341	3.11344	Normal	BRCA
TCGA-BH-A0BR-01A	3.19375	2.36289	2.36431	2.45175	2.38003	4.04455	4.15597	3.14032	2.82517	2.46454	2.78206	4.05807	2.64531	3.58354	2.26018	3.22799	2.888	Tumor	BRCA
TCGA-A8-A07G-01A	2.99764	2.47544	3.48719	2.02052	2.43766	3.58943	4.53238	3.73355	2.80018	2.4962	2.84855	4.30321	2.95972	3.05107	3.1744	3.80924	3.81145	Tumor	BRCA
TCGA-A2-A0EN-01A	3.51646	2.37509	2.8141	2.40498	2.48972	3.54751	3.80506	3.72387	2.93207	2.70083	2.92919	3.79956	2.98282	2.6998	3.00237	3.59482	2.72057	Tumor	BRCA
TCGA-OK-A5Q2-01A	4.54244	2.76093	2.84527	3.10031	2.52598	3.64134	3.6008	3.79186	2.84991	2.56941	3.14569	3.91069	3.63006	3.63198	3.22574	3.70699	3.4016	Tumor	BRCA
TCGA-A8-A084-01A	3.92524	2.70721	2.80786	2.77355	2.7732	4.01909	4.0805	4.01011	3.12021	2.8506	3.66894	4.3063	3.53333	3.95435	3.31474	3.53096	3.27103	Tumor	BRCA
TCGA-BH-A0DS-01A	4.48218	2.33109	2.33702	2.78511	3.08027	3.57477	3.71805	3.50494	2.61176	2.49353	2.83585	4.47377	2.88617	3.47676	2.65438	3.77807	2.95351	Tumor	BRCA
TCGA-A8-A09I-01A	3.89974	2.64442	3.18856	2.12623	3.18293	4.23842	4.73038	4.01914	3.32785	1.98748	3.33401	4.37875	3.22404	3.6552	4.36355	3.56723	3.89917	Tumor	BRCA
TCGA-GM-A3XL-01A	4.72989	2.79977	3.19393	3.32935	2.2021	4.15887	4.66232	4.07338	2.49634	3.00745	2.75392	3.37092	4.5834	3.38474	4.01548	2.9592	3.75395	Tumor	BRCA
TCGA-W8-A86G-01A	5.57684	2.61166	2.59526	3.10163	1.98228	3.23704	3.55109	3.76035	3.41239	2.27452	3.47691	3.81055	3.87866	2.75506	3.12538	3.33965	3.17932	Tumor	BRCA
TCGA-AO-A12F-01A	4.33779	2.46895	2.86176	3.08921	2.58515	5.20453	4.32397	3.84743	2.48797	2.74543	3.23664	4.11542	3.35929	3.53855	3.11503	4.14045	3.51081	Tumor	BRCA
TCGA-BH-A0HK-01A	3.30773	2.06879	2.8447	2.56442	2.61252	3.79979	3.75517	3.42098	2.62461	1.62354	2.74501	4.02392	2.76723	3.63968	2.87528	3.45867	2.80258	Tumor	BRCA
TCGA-A8-A06Q-01A	3.67667	2.19726	3.17434	2.74473	2.73686	4.43281	4.39587	5.01086	3.15596	2.11207	3.66899	4.46158	2.41795	3.47267	3.09736	3.84885	3.95089	Tumor	BRCA
TCGA-BH-A42U-01A	4.54078	2.55911	2.62306	3.21277	1.84929	3.27385	3.50212	3.25555	2.76555	2.41179	2.67222	3.41231	3.9435	2.71059	2.76164	3.31325	2.95893	Tumor	BRCA
TCGA-BH-A0BW-11A	4.12823	2.8413	2.93142	2.84973	2.78578	3.67723	4.7253	4.10887	3.51613	2.491	3.6186	4.26488	3.46419	3.08173	3.19936	4.03696	3.10523	Normal	BRCA
TCGA-AQ-A04L-01B	4.22165	2.26906	1.88662	2.98965	2.1747	3.55902	4.33066	3.26684	2.68304	2.49973	3.14369	3.99354	2.15499	2.04691	3.26355	2.98281	3.58232	Tumor	BRCA
TCGA-AR-A1AO-01A	3.51705	2.35937	2.83169	2.84156	2.7831	3.9283	4.35256	3.3611	2.72104	2.85044	2.90398	4.12794	3.28573	3.30124	2.96059	3.77179	3.01688	Tumor	BRCA
TCGA-Z7-A8R5-01A	3.58147	2.47883	2.48676	3.27002	2.02776	3.49035	3.52058	3.3534	2.38502	2.5742	2.75881	3.52004	3.47013	2.77673	2.87476	3.28261	3.17796	Tumor	BRCA
TCGA-B6-A0I1-01A	4.81298	2.47011	2.91181	2.70425	2.55461	3.8892	3.51616	3.53771	2.29222	2.61713	2.94681	4.02611	2.48763	4.17717	3.657	0.492381	3.70077	Tumor	BRCA
TCGA-E9-A1N6-11A	4.20284	2.6888	2.96605	2.81985	2.35265	3.27904	4.32897	3.74286	3.56359	2.20105	3.21701	3.97741	3.26292	2.775	2.79511	3.77244	2.90183	Normal	BRCA
TCGA-EW-A1PA-01A	4.26213	2.65273	2.93003	2.88347	3.06292	3.87523	5.01864	3.77936	3.39846	2.41709	3.2538	4.62148	2.47152	3.58441	3.17276	3.17596	5.45669	Tumor	BRCA
TCGA-BH-A0W4-01A	4.02487	2.61235	2.92853	2.30465	2.78149	3.73634	4.06436	3.87993	2.74325	1.77241	3.00045	4.35926	3.4178	3.1946	3.09116	3.79288	2.95079	Tumor	BRCA
TCGA-A2-A3XZ-01A	4.52973	3.22984	2.96831	3.71112	2.50361	3.98124	3.85907	3.95691	3.00672	3.05632	3.22125	3.79925	3.90693	3.621	3.27169	3.73184	3.47252	Tumor	BRCA
TCGA-A7-A26H-01A	3.58651	2.73553	2.82765	1.56189	3.05137	3.72088	4.80586	3.83038	3.62298	2.09479	3.58631	4.32224	3.10473	3.61563	3.28544	3.86153	2.97547	Tumor	BRCA
TCGA-E2-A1B0-01A	3.21641	2.32892	2.85426	2.6908	3.42875	4.05108	4.5619	3.52881	3.08149	2.58519	3.35438	4.49225	2.91913	3.75944	3.44917	2.95284	3.18237	Tumor	BRCA
TCGA-BH-A1EU-01A	3.12008	2.47937	2.67623	2.28353	2.96247	3.62949	4.70736	4.35985	4.07774	2.60893	3.74996	4.37379	2.91931	3.34501	3.05463	3.73552	3.28842	Tumor	BRCA
TCGA-AC-A23H-01A	3.62273	2.73223	2.99159	2.23995	2.77032	3.55626	3.84819	3.8728	2.55352	2.55235	3.33198	4.61935	2.72568	3.94937	3.03657	3.18065	3.71974	Tumor	BRCA
TCGA-EW-A1P4-01A	3.93027	2.7526	2.91044	2.32413	2.49506	3.74641	5.11155	3.76679	2.22636	2.78314	3.27324	3.93278	3.92994	2.95309	3.15191	3.82066	3.07794	Tumor	BRCA
TCGA-E2-A10E-01A	3.58217	2.66073	2.92516	2.65438	3.06376	3.83638	3.83279	4.03322	2.88062	2.31433	3.02239	4.40248	3.26321	3.6428	3.38631	3.69562	3.32549	Tumor	BRCA
TCGA-EW-A1P0-01A	4.51575	2.69286	3.13436	3.24783	3.3086	4.00568	4.63856	3.91268	3.21806	2.09049	3.10244	4.7013	4.00941	3.34916	3.18035	3.78989	3.57236	Tumor	BRCA
TCGA-EW-A6S9-01A	4.17218	2.53259	2.88143	2.83077	2.88174	4.07467	3.80327	3.69051	2.99002	2.47494	2.88243	3.7993	5.31636	4.09022	3.26175	3.46825	3.23561	Tumor	BRCA
TCGA-A2-A25B-01A	3.4479	2.3761	2.93913	2.84889	3.22564	3.94183	5.19843	4.15932	3.26534	2.59432	3.468	4.64775	2.99286	3.99793	3.27437	3.70556	3.37326	Tumor	BRCA
TCGA-LL-A6FR-01A	4.83461	2.13077	1.60848	3.32856	1.81955	3.90966	3.16917	2.8204	1.17062	2.2985	1.85284	3.39743	3.68	2.69232	2.73898	2.07878	3.7656	Tumor	BRCA
TCGA-AR-A5QM-01A	4.01426	2.4396	2.43474	3.27535	2.64052	3.3216	4.21582	3.47168	3.2604	2.59269	3.47285	4.09212	3.7404	2.98692	2.72348	3.59679	3.30558	Tumor	BRCA
TCGA-BH-A18Q-11A	3.78565	2.8268	2.8445	2.68282	2.547	3.41841	4.94525	4.10971	3.74527	2.3941	3.60553	4.19053	3.31559	3.01404	2.9281	3.79925	3.13742	Normal	BRCA
TCGA-EW-A1P5-01A	3.841	2.55726	3.08664	2.66221	3.20788	3.777	4.72943	3.82781	3.4598	2.03689	3.09327	4.26107	3.80926	3.87556	3.23171	3.50815	3.40765	Tumor	BRCA
TCGA-E2-A14O-01A	2.96842	2.03795	2.36685	2.71468	2.45941	3.47443	3.65935	3.53145	2.20261	1.57552	2.89686	4.41206	2.86141	3.71824	3.19671	3.7573	3.12401	Tumor	BRCA
TCGA-AN-A0AR-01A	4.2705	2.66163	2.88609	3.51939	2.87497	4.59461	4.98996	3.73026	2.97472	3.29576	3.13071	3.09217	3.64673	3.79128	3.14794	4.56437	2.38762	Tumor	BRCA
TCGA-E9-A22D-01A	4.00627	2.62377	3.07627	2.96337	3.509	3.80224	3.60712	3.76248	4.59539	2.4997	3.19052	4.62781	3.94155	3.49555	3.62772	4.07393	4.77363	Tumor	BRCA
TCGA-A2-A0CS-01A	3.0121	2.01599	2.182	2.3687	2.71865	3.78717	3.6603	3.44083	2.33629	2.57483	2.74643	4.05446	3.08669	2.98888	2.92609	3.52758	3.45611	Tumor	BRCA
TCGA-E2-A1IF-01A	3.3904	2.47621	2.82286	2.90009	2.48103	3.59627	3.26639	3.44998	2.53366	2.48632	3.32682	3.80574	3.42599	2.77687	2.99208	3.31596	2.86236	Tumor	BRCA
TCGA-BH-A0DZ-11A	4.11539	2.56324	2.63001	3.05381	2.13601	3.57172	3.98367	3.39641	2.54133	2.88228	2.85359	3.67874	3.57584	2.87904	2.83811	3.6382	3.31419	Normal	BRCA
TCGA-E2-A1IE-01A	3.54804	2.67649	2.85777	2.65779	2.21111	3.71363	3.96774	4.00528	3.37514	2.39723	3.15638	3.67635	3.45067	3.68436	3.19667	4.24772	3.31194	Tumor	BRCA
TCGA-BH-A0BW-01A	4.12215	2.83436	3.32758	2.51827	2.9223	4.75946	5.35787	4.04288	2.86844	2.1402	3.46093	3.98462	3.70253	3.5796	3.67106	3.21111	3.05965	Tumor	BRCA
TCGA-E2-A1AZ-01A	4.33652	2.95206	3.18531	3.30576	2.97332	4.77555	5.46886	4.18584	3.20375	2.9455	3.71864	4.44609	3.0792	4.16755	3.1707	4.30607	3.2856	Tumor	BRCA
TCGA-D8-A27N-01A	3.34943	2.60792	2.92695	2.531	2.72037	3.61683	3.95582	3.65205	2.37663	2.09288	3.17893	4.12027	4.19601	3.35561	3.13176	3.72542	3.37285	Tumor	BRCA
TCGA-A2-A0CT-01A	4.197	2.21126	3.2242	3.2306	3.33511	3.94557	4.22083	3.9058	2.32064	2.97289	3.01082	4.31053	3.47577	4.04715	3.67467	3.97592	4.73614	Tumor	BRCA
TCGA-A8-A09R-01A	3.81759	2.71082	2.47259	2.33512	2.86533	3.73852	3.61341	3.75456	2.9289	2.31454	2.9869	4.01327	3.57108	4.35189	3.27091	3.6912	3.34521	Tumor	BRCA
TCGA-B6-A0RE-01A	4.68893	2.59149	2.66696	3.05662	2.29797	4.36741	3.70974	3.84916	2.25255	2.56175	2.60473	3.79226	2.58274	3.89326	3.62897	2.92565	3.00843	Tumor	BRCA
TCGA-E9-A249-01A	3.462	2.29383	2.87803	2.9785	2.98256	3.86749	4.0182	4.10255	3.45042	3.28425	3.96265	4.29032	3.62186	3.20143	3.47508	3.94704	3.83647	Tumor	BRCA
TCGA-E2-A1B5-01A	2.99242	2.45683	2.69046	2.76074	2.78108	3.86513	4.54589	3.4553	3.11722	2.58447	2.96322	4.29262	2.65998	3.00059	2.99622	3.71784	2.98902	Tumor	BRCA
TCGA-A2-A25A-01A	3.79831	2.65185	2.78669	2.70343	2.59936	3.56924	4.36572	3.87883	3.28763	2.66811	3.39241	4.25635	2.95451	3.03364	3.01351	3.82362	3.17608	Tumor	BRCA
TCGA-AO-A03O-01A	5.11197	2.68656	3.40603	2.17717	2.94635	4.07455	5.57096	5.3105	2.58122	1.93356	3.57375	4.96249	3.43042	3.36541	3.43092	4.29473	5.1743	Tumor	BRCA
TCGA-E9-A22A-01A	3.67037	2.07591	2.81737	2.20168	2.69951	3.75028	4.42736	3.52098	2.31594	2.58607	2.74412	3.62357	2.66432	2.90065	2.95093	3.81829	3.16655	Tumor	BRCA
TCGA-BH-A1EV-11A	3.17581	2.47613	2.80331	2.3812	2.80587	3.66838	4.96686	3.92393	3.49666	2.55662	3.76811	4.449	2.61188	2.71119	3.0727	3.85875	3.00254	Normal	BRCA
TCGA-BH-A0GZ-01A	3.61528	2.48618	2.18758	2.07651	2.50696	4.21689	4.4626	3.66509	2.37592	1.83547	2.5383	4.23541	3.06524	4.31832	3.1284	3.96399	3.27924	Tumor	BRCA
TCGA-BH-A1FD-01A	3.19318	2.69845	3.43842	2.49849	2.1923	3.51855	4.65698	3.95567	3.10566	2.67954	3.64249	3.75397	3.19596	3.91662	3.32179	2.8111	3.28652	Tumor	BRCA
TCGA-A1-A0SH-01A	3.38585	2.1621	2.4357	2.04067	2.51543	3.25091	3.77252	3.23277	2.50235	2.39633	2.67215	3.72645	2.92871	2.80748	2.65437	3.70325	2.8455	Tumor	BRCA
TCGA-E2-A10A-01A	3.85588	2.62441	3.23179	2.55492	3.15517	4.00066	3.76692	3.9339	2.91263	2.59586	3.37512	4.57375	3.80168	4.09573	3.18631	4.18022	3.2026	Tumor	BRCA
TCGA-B6-A0IO-01A	3.59185	2.60421	3.08782	3.40285	2.28333	3.73735	4.62303	3.94619	2.8038	2.74022	3.49068	3.93529	3.77429	3.972	3.01805	3.35907	3.50308	Tumor	BRCA
TCGA-BH-A1FR-01A	3.74543	2.44875	2.84797	2.59836	2.72872	3.703	4.36488	3.88678	3.15313	2.41304	3.20129	4.37404	3.49473	2.82294	3.33215	3.76385	3.22812	Tumor	BRCA
TCGA-D8-A143-01A	4.37914	2.69561	2.90057	2.9249	3.32371	5.61102	5.54042	4.09325	2.2843	2.41654	3.72696	4.62339	3.34799	4.3455	4.23806	3.78278	3.72797	Tumor	BRCA
TCGA-AO-A03R-01A	4.69598	2.27253	2.88907	2.91257	2.29064	3.0806	3.77013	3.40305	2.71466	1.7566	2.86019	3.73179	2.59999	3.46207	3.70988	3.39352	2.83037	Tumor	BRCA
TCGA-BH-A0DQ-11A	3.65885	2.70916	2.85968	2.73036	2.55674	3.55687	4.92474	3.85333	3.35783	2.67337	3.46623	4.22209	3.44191	3.17061	2.93531	3.96561	3.13275	Normal	BRCA
TCGA-BH-A0BV-11A	4.05719	2.65836	2.80322	2.573	2.52534	3.37327	4.47889	3.76229	3.42161	2.27612	3.40395	4.16063	3.26053	2.98952	2.93227	3.78945	2.99142	Normal	BRCA
TCGA-BH-A0E0-01A	4.79234	2.43232	2.38561	3.21057	2.21366	5.12413	3.702	3.57146	3.12419	2.74034	2.76465	3.91388	3.39095	3.78851	2.82542	3.47348	3.51504	Tumor	BRCA
TCGA-A8-A0AD-01A	3.56923	2.53793	2.66322	2.2501	3.02838	3.62708	4.04436	3.74331	2.77263	2.09429	3.22896	4.6317	3.27163	3.5155	2.89976	3.06941	3.08322	Tumor	BRCA
TCGA-GM-A2DI-01A	3.84418	2.63342	2.61665	2.1242	2.73749	3.58104	4.17988	3.57956	3.20426	2.65438	3.5217	4.29686	3.51457	3.27962	2.53888	4.06842	3.34981	Tumor	BRCA
TCGA-E9-A6HE-01A	4.54874	2.34379	2.59143	3.22145	2.13926	3.78126	3.21535	3.40701	1.64386	2.18413	2.63383	3.61651	4.11979	3.10112	2.29627	3.27184	2.99043	Tumor	BRCA
TCGA-BH-A0B3-01A	3.77089	2.72984	3.05348	2.98775	2.75783	4.81118	4.18677	3.89798	2.3907	2.82542	3.50172	3.92193	3.51567	4.11039	2.93896	3.10361	3.19401	Tumor	BRCA
TCGA-AR-A0TU-01A	4.43671	2.41306	3.69447	3.92484	2.78528	5.4376	4.30643	4.289	2.64986	3.41494	3.29117	4.07822	2.80477	3.64141	4.84207	4.34396	3.29266	Tumor	BRCA
TCGA-LQ-A4E4-01A	5.31862	3.0401	2.84013	3.32776	2.64836	3.65475	3.91155	4.20916	3.09168	1.95723	3.55822	4.27302	4.06108	3.42697	2.68964	4.18163	3.52684	Tumor	BRCA
TCGA-PL-A8LY-01A	3.75705	2.6168	2.6526	3.26879	2.17237	3.85764	4.23145	3.62631	2.71024	2.7218	2.96355	3.67408	3.5772	2.94806	3.24532	3.77304	3.41899	Tumor	BRCA
TCGA-BH-A1FU-01A	3.99123	2.59077	2.89534	2.54734	3.11086	3.72442	4.43932	3.78377	3.05044	2.50664	3.36366	4.4032	2.95784	3.52477	2.97021	3.77	3.07188	Tumor	BRCA
TCGA-A8-A09D-01A	3.75518	2.09826	2.5697	2.58514	2.33353	3.45521	4.75443	4.93028	2.85602	2.39791	2.8616	3.46922	3.22834	2.77784	2.86317	3.52047	5.31799	Tumor	BRCA
TCGA-B6-A3ZX-01A	4.5731	2.32933	2.8491	3.06778	2.10971	3.715	3.99341	3.86521	3.21948	2.96242	3.39674	3.37543	3.44043	3.4311	3.40058	4.07365	3.21437	Tumor	BRCA
TCGA-A7-A5ZV-01A	5.34687	2.25959	2.78075	3.04983	2.194	3.51192	4.74047	3.49444	2.39304	3.37015	3.12999	3.67807	3.2394	2.96176	3.4061	3.56397	3.14005	Tumor	BRCA
TCGA-BH-A0AY-01A	4.74982	2.20352	2.79224	2.16424	2.5491	3.77281	3.67807	3.38455	2.46666	2.32944	3.26464	3.78331	2.62744	3.18208	2.90911	3.57541	2.7918	Tumor	BRCA
TCGA-A7-A4SD-01A	4.87872	2.67411	2.18494	3.33904	2.28605	3.93588	4.44311	3.81827	2.47812	2.97545	3.30099	3.77588	4.507	4.08886	3.61266	3.69093	2.94412	Tumor	BRCA
TCGA-AO-A03L-01A	3.81469	2.36362	3.06759	2.27272	3.10964	4.08554	4.26246	4.01061	2.55265	2.69818	3.6082	4.55874	3.40546	3.61654	3.58121	4.1368	3.91359	Tumor	BRCA
TCGA-A2-A0EX-01A	4.74339	2.34312	2.63356	2.69219	2.55191	3.66923	3.89273	3.66751	2.75572	2.63338	2.46244	4.00195	3.44898	3.16558	3.062	3.74233	3.20058	Tumor	BRCA
TCGA-GM-A2DM-01A	3.45418	2.57726	2.94878	2.45956	2.67629	3.73821	4.35979	3.53837	2.73572	2.26971	2.70344	4.23028	3.38249	3.25436	2.95154	3.71072	3.09918	Tumor	BRCA
TCGA-BH-A0DO-01B	3.63016	2.59953	2.74078	2.73522	2.49027	3.59794	4.00385	3.87389	3.25123	2.84269	3.41593	4.1344	3.60948	2.72463	3.12937	3.51621	3.21734	Tumor	BRCA
TCGA-HN-A2OB-01A	4.43447	2.60553	2.62336	2.68667	2.08739	3.06367	3.75792	3.79115	2.84224	2.33357	3.04045	3.96497	3.45428	3.13315	2.89124	3.66129	2.96609	Tumor	BRCA
TCGA-A2-A0CM-01A	4.8832	2.75172	3.21091	2.86744	2.85564	4.19899	4.43236	4.41526	2.82537	2.94878	3.53655	4.38799	3.36519	4.25479	3.57848	4.01117	3.57114	Tumor	BRCA
TCGA-A2-A4S0-01A	4.20236	2.62577	2.69321	2.61089	2.68963	3.58064	3.93498	3.81025	3.25636	2.03963	2.99403	4.03801	3.58299	2.85817	3.17175	3.53102	2.92985	Tumor	BRCA
TCGA-BH-A0H9-01A	3.60543	2.53619	2.76664	2.62328	2.96299	4.1351	5.22258	4.19338	2.64421	2.53693	3.09091	4.56761	3.37456	3.5934	3.59843	3.50874	3.46253	Tumor	BRCA
TCGA-B6-A0IP-01A	3.66207	2.81431	3.19734	2.91319	2.77729	3.65455	4.02648	4.0347	3.24422	2.79536	3.5237	4.25092	3.1666	3.43501	3.07341	3.757	3.4744	Tumor	BRCA
TCGA-C8-A12X-01A	3.96779	2.13987	2.7146	2.92515	2.23282	3.4517	4.25068	3.49643	2.78697	2.69243	2.68531	3.5418	4.0303	2.75336	3.36522	4.03115	2.85197	Tumor	BRCA
TCGA-AN-A0AL-01A	3.24588	2.70033	3.03752	2.52433	2.9019	4.04304	4.5077	3.71339	2.54862	2.51315	2.34153	4.31696	2.77707	3.3916	3.20766	3.27689	2.92006	Tumor	BRCA
TCGA-LD-A9QF-01A	3.6707	2.43736	2.55121	3.07299	2.2541	3.3804	3.80915	3.1385	2.62083	2.43353	2.54503	3.4457	3.55306	2.94599	2.79611	3.73752	2.76565	Tumor	BRCA
TCGA-BH-A0DG-11A	3.50893	2.68593	3.01399	2.59446	2.56243	3.58697	4.96664	4.1061	3.66472	2.68695	3.70058	4.34847	3.13143	3.01384	3.00007	3.9192	3.15507	Normal	BRCA
TCGA-E2-A152-01A	3.88912	2.42526	2.72667	2.6115	2.63675	3.61426	4.42099	3.47166	2.91665	1.98524	3.12789	4.31815	2.99283	3.37608	3.08718	3.59698	3.21184	Tumor	BRCA
TCGA-BH-A1FE-06A	3.65789	1.9686	2.58928	2.63421	2.22879	3.09968	3.81253	3.02888	2.64332	2.13001	3.2833	3.9735	3.08972	2.52855	2.48771	3.63191	2.54252	Tumor	BRCA
TCGA-BH-A18N-01A	3.92242	2.62926	3.07069	2.35505	2.71489	3.48205	3.96013	3.98409	3.79681	1.98881	3.68044	4.21176	3.94133	3.47229	3.16257	3.59474	3.13389	Tumor	BRCA
TCGA-C8-A1HN-01A	3.5311	2.40236	2.85385	2.54784	2.16943	4.21854	5.11619	5.86467	2.91903	2.1918	3.62581	3.77368	2.96303	3.68287	3.38853	3.96883	2.812	Tumor	BRCA
TCGA-AN-A0FK-01A	3.66739	2.07343	2.44313	2.32092	2.67783	3.13582	3.80231	3.98367	2.77353	3.10614	2.96238	4.22978	3.91368	3.54988	3.34969	3.64056	3.23559	Tumor	BRCA
TCGA-B6-A0IE-01A	4.80672	2.63677	2.83675	2.79392	2.45439	3.8129	4.88513	3.19309	3.57458	3.15652	3.68562	4.05711	2.96519	3.40053	3.12161	3.98025	4.98953	Tumor	BRCA
TCGA-B6-A400-01A	4.74442	3.00737	2.99398	2.79685	2.39498	3.59626	4.32466	4.04282	2.80672	3.01953	3.14793	3.69683	3.48237	3.25477	3.25339	3.94315	3.54518	Tumor	BRCA
TCGA-GM-A2DB-01A	4.51744	2.75215	2.58582	3.35511	3.16228	4.05181	3.29478	3.34717	2.72702	2.0243	2.85905	4.60469	2.21819	3.80844	3.08017	3.29429	2.56521	Tumor	BRCA
TCGA-AC-A2FK-01A	4.12824	2.74867	2.93552	2.62794	2.56168	3.3866	4.6562	4.06297	3.59506	2.59317	3.49423	4.25592	3.48138	3.01294	3.0386	3.97047	3.15016	Tumor	BRCA
TCGA-BH-A0HU-01A	5.02741	2.48452	3.15309	3.682	2.74973	3.97978	4.67913	4.13367	2.40713	3.90425	3.02486	3.91957	3.63776	2.98351	3.34902	3.29519	3.77973	Tumor	BRCA
TCGA-D8-A140-01A	3.90278	2.93987	2.86158	2.55297	3.03396	3.71978	4.48011	4.13824	4.33474	2.87751	3.38748	4.26597	3.82325	3.61679	3.9421	4.23348	3.60519	Tumor	BRCA
TCGA-A7-A0CD-01A	3.52907	2.64029	2.75536	1.93797	2.72504	3.66376	4.52775	3.94521	3.49814	2.76052	3.06219	4.06965	3.54268	3.65448	4.01114	4.35113	3.67417	Tumor	BRCA
TCGA-D8-A1JF-01A	3.11934	2.1543	2.07665	2.33748	3.34516	3.69502	4.33406	3.43946	3.25681	3.00859	3.11003	4.90643	2.79269	3.33712	3.29993	4.00636	3.28152	Tumor	BRCA
TCGA-BH-A208-11A	3.87494	2.68242	3.18409	2.65138	2.27577	3.38735	4.66411	3.8155	3.93626	2.26958	3.83589	4.34778	3.23945	2.6958	2.87785	3.71336	3.0546	Normal	BRCA
TCGA-A2-A4S1-01A	3.81733	2.20733	2.38282	2.84658	1.77772	3.43744	3.43616	2.52647	2.26852	1.84041	2.5863	3.03358	3.42613	2.42472	2.43794	2.4478	2.33689	Tumor	BRCA
TCGA-5T-A9QA-01A	4.11812	3.04693	3.00378	2.91376	3.2715	3.86633	4.54162	3.84952	2.8032	2.12313	2.8676	4.25878	4.66561	3.52832	3.863	4.31125	4.03418	Tumor	BRCA
TCGA-AR-A2LK-01A	4.33163	2.47426	3.16043	2.34057	3.4531	3.55697	4.52386	4.09579	3.25901	2.31978	3.53395	5.07457	2.89105	4.33074	3.3683	3.58816	3.53787	Tumor	BRCA
TCGA-AR-A1AH-01A	3.40164	2.46131	2.95417	3.23607	2.49529	6.23953	4.89288	4.31739	2.93681	3.51441	4.01931	4.42317	3.48349	3.62305	3.67021	4.42026	3.91269	Tumor	BRCA
TCGA-AR-A254-01A	4.01199	2.40423	2.89701	2.38812	3.3496	3.8847	4.32985	3.86451	2.88524	2.57553	3.58234	4.36108	3.44898	2.87378	3.79449	3.26242	4.05056	Tumor	BRCA
TCGA-E2-A1IO-01A	4.63481	2.5087	3.4371	2.50961	2.71236	3.59138	4.69199	3.83798	3.38675	2.56826	3.47024	4.49345	3.22246	3.04847	2.79369	3.89704	3.47149	Tumor	BRCA
TCGA-S3-A6ZF-01A	4.46612	2.1788	3.34286	3.27377	2.49155	3.65143	4.04558	4.29932	4.16831	3.04611	3.32359	3.77135	2.78901	3.43295	2.85744	3.88643	3.71925	Tumor	BRCA
TCGA-B6-A0IB-01A	4.16815	2.53429	2.39782	3.94401	3.0686	3.94158	3.75242	3.83732	2.80261	2.73989	3.11628	3.88327	3.12871	4.6816	2.95859	4.00232	3.78395	Tumor	BRCA
TCGA-A8-A07J-01A	3.60014	2.33086	2.77064	2.35634	2.96021	3.80179	3.90605	3.36152	2.97566	2.91672	3.21459	3.82998	3.49425	3.24947	3.06813	3.90325	3.33098	Tumor	BRCA
TCGA-AN-A0FV-01A	3.3631	2.41524	3.13294	2.06399	2.92576	4.39245	4.07771	3.86658	1.94816	2.74071	3.53962	4.18118	3.02411	3.44697	3.59058	4.44562	3.14698	Tumor	BRCA
TCGA-AN-A0XP-01A	3.13101	2.38623	2.55189	2.45946	2.74123	3.46326	3.91939	3.70233	3.25063	2.93686	3.12994	4.28484	3.19153	3.2449	3.07511	3.71824	3.86792	Tumor	BRCA
TCGA-A8-A08Z-01A	3.54223	2.61943	2.77711	2.32731	2.90773	3.24476	4.1038	3.85651	3.11548	2.50638	3.50382	4.38074	3.29548	3.18605	3.06551	3.85718	3.07076	Tumor	BRCA
TCGA-E9-A226-01A	3.05959	2.47463	2.75976	2.41472	2.99972	3.99952	4.12957	4.26382	3.24128	2.93562	3.64087	4.48516	2.74127	3.0778	3.10981	3.80404	4.56599	Tumor	BRCA
TCGA-AR-A1AW-01A	5.45478	2.83259	3.41278	2.8767	2.90609	3.89383	4.28152	4.28563	3.36521	2.97007	3.69499	4.46404	3.79651	3.37722	3.23763	4.24453	3.2566	Tumor	BRCA
TCGA-GI-A2C9-01A	4.09821	2.4944	3.04359	2.25273	2.53654	3.87652	4.91914	3.99508	2.56586	2.9063	2.98555	3.99432	3.601	3.06114	3.285	3.46195	3.06272	Tumor	BRCA
TCGA-EW-A6SA-01A	5.08969	2.41085	3.51986	2.65212	3.14692	3.91395	3.89124	5.29872	2.66231	2.25023	3.89429	4.62596	3.30242	4.42074	3.60504	3.79732	3.33782	Tumor	BRCA
TCGA-E9-A1NG-01A	3.34106	2.29844	2.82906	2.26355	2.78574	3.8659	3.87242	3.63	2.43235	2.37123	2.96339	4.2327	3.37233	3.0652	2.75115	3.78509	2.89722	Tumor	BRCA
TCGA-A8-A07L-01A	3.47732	2.81368	2.99823	2.59004	3.78468	4.05547	4.04829	4.10234	3.4004	2.77609	3.45424	3.81204	3.41162	3.99332	3.32156	4.18435	3.74674	Tumor	BRCA
TCGA-E2-A15L-01A	3.36085	2.34946	2.83318	2.5121	2.83405	3.77359	3.88326	3.68579	2.97747	2.32367	3.11781	4.14162	3.12894	3.08343	3.16006	3.5981	3.03594	Tumor	BRCA
TCGA-D8-A1JI-01A	3.81177	2.3142	3.14822	2.71881	3.28091	3.7482	3.69331	3.6937	3.01315	1.97275	3.05901	4.90242	3.34865	2.87859	3.32565	4.08746	3.69185	Tumor	BRCA
TCGA-GM-A2DO-01A	5.06899	2.77333	2.83859	2.82388	2.48249	3.77039	3.78145	3.72657	3.22311	1.97516	3.83468	4.19228	3.48579	3.11097	3.53004	3.52116	2.89702	Tumor	BRCA
TCGA-EW-A1P6-01A	5.94095	2.44604	2.84525	2.43455	2.80279	3.84492	3.77419	3.7726	2.89532	2.86914	3.67728	4.19742	3.53248	3.52398	3.13729	3.66774	3.11788	Tumor	BRCA
TCGA-BH-A1F0-11B	3.19835	2.60429	2.75174	2.65863	2.39649	3.50113	4.51501	3.50166	3.34737	2.52334	3.44911	4.0094	2.83101	2.59947	2.64376	3.8302	2.93164	Normal	BRCA
TCGA-AR-A1AI-01A	4.46363	2.74595	3.13209	3.19976	2.99506	4.96545	5.22475	3.90713	2.35154	3.45724	3.82449	4.4928	3.941	3.93799	4.61149	1.96496	3.68771	Tumor	BRCA
TCGA-AR-A0U3-01A	4.5088	2.68992	2.56031	2.77023	3.49276	4.31824	4.63551	4.00908	3.11103	2.27266	3.43343	4.73193	2.86726	4.46612	3.09667	4.19673	3.35549	Tumor	BRCA
TCGA-A2-A0ES-01A	3.60568	2.53316	2.80855	2.29437	2.56116	3.4536	4.57373	3.82955	3.13749	2.48458	3.2399	4.32021	3.31008	2.7821	3.0363	3.81119	3.02262	Tumor	BRCA
TCGA-BH-A18K-11A	4.17302	2.76074	2.71773	2.83906	2.42017	3.4397	4.50406	3.86714	3.50399	2.57526	3.39107	4.0164	3.45249	2.92797	2.78363	3.76829	3.05088	Normal	BRCA
TCGA-A8-A06P-01A	4.34504	2.4467	3.01641	2.36467	2.45752	3.55485	3.80243	3.30384	2.7103	2.53891	3.23662	3.72222	3.21391	3.18036	2.99268	3.69259	3.01578	Tumor	BRCA
TCGA-S3-AA12-01A	5.60092	2.61269	2.95282	2.87773	2.70943	3.74541	3.68988	3.78878	3.58677	2.38205	3.1536	4.1152	4.15437	4.1172	3.34077	4.34511	2.87511	Tumor	BRCA
TCGA-E9-A1N5-11A	4.40805	2.57521	2.872	2.57207	2.58167	3.44558	4.65636	4.05965	3.34583	2.16538	3.25898	4.04337	3.50975	3.22655	3.17819	3.70171	3.05942	Normal	BRCA
TCGA-E9-A3Q9-01A	3.43585	2.43886	2.83741	2.57008	2.40976	3.27409	4.22468	3.7158	3.17637	1.89075	3.31138	4.02412	2.83866	3.2767	2.81869	3.37951	2.59667	Tumor	BRCA
TCGA-BH-A0HX-01A	3.45338	2.20424	3.12186	2.38345	2.61729	3.82022	4.06948	3.74414	2.55256	2.09793	2.97796	3.73477	3.47931	3.63731	3.02017	3.79336	3.70407	Tumor	BRCA
TCGA-AC-A3W7-01A	5.12583	2.67979	2.80008	2.92422	2.18971	3.2215	3.64856	3.72544	3.18299	2.54995	3.42178	3.87411	3.83893	3.01488	2.72902	3.75372	3.13416	Tumor	BRCA
TCGA-AO-A124-01A	4.29975	3.08476	2.83462	2.62673	3.26801	4.12366	4.71695	4.00357	2.03133	3.36903	3.77931	4.58806	3.19726	3.40232	3.44889	3.6986	3.07048	Tumor	BRCA
TCGA-AC-A5XU-01A	5.11685	2.64349	2.90383	2.88928	2.42203	3.66131	3.90189	3.7664	2.9741	2.17127	3.52634	4.13444	4.33347	3.92789	2.78968	3.8609	3.23533	Tumor	BRCA
TCGA-LL-A6FQ-01A	4.14835	2.41094	2.24716	3.04887	1.99051	3.72652	4.0711	3.26865	2.0369	2.65437	2.17224	3.55186	4.1872	3.04554	3.13567	3.12332	3.39234	Tumor	BRCA
TCGA-AQ-A1H2-01A	3.75692	2.62875	3.13071	1.70358	3.0923	3.96401	3.83008	3.35415	4.12254	3.00348	3.35484	4.36977	3.55688	3.30324	3.5526	3.7817	3.90355	Tumor	BRCA
TCGA-BH-A0DQ-01A	3.71131	2.40796	2.98367	2.39538	2.67979	3.70045	4.35936	3.79714	2.44968	2.64318	3.20348	4.02749	3.36717	3.62704	3.12677	3.92072	3.47998	Tumor	BRCA
TCGA-E2-A106-01A	3.94685	2.53276	2.87417	2.43488	2.64432	3.22923	4.10998	3.83825	2.35285	2.43798	3.48484	4.28102	4.15702	3.43896	3.16278	4.03995	4.94646	Tumor	BRCA
TCGA-A2-A25F-01A	3.63487	2.61377	2.90599	2.53074	3.27213	4.01564	4.68109	3.78382	3.01462	2.76434	3.12161	4.34183	3.11813	3.4516	3.06158	3.89424	3.08859	Tumor	BRCA
TCGA-AN-A0AT-01A	4.06649	2.86178	3.33199	2.41427	3.11906	5.00594	5.44393	3.77183	2.43117	3.1926	3.43216	4.71664	3.10503	4.23324	3.47612	3.8731	3.47241	Tumor	BRCA
TCGA-D8-A27T-01A	3.84586	2.38396	2.46883	2.68627	2.66758	3.4232	3.89514	3.90732	3.37944	2.586	3.05337	3.9517	3.4029	3.26633	3.05578	3.66628	3.14831	Tumor	BRCA
TCGA-A2-A04X-01A	2.78136	2.78379	3.12264	2.12921	3.0573	3.7029	4.10917	3.67549	2.75784	2.39586	3.09795	4.08689	3.92808	3.3623	3.51667	3.98364	3.98155	Tumor	BRCA
TCGA-A2-A3XT-01A	3.49898	3.08823	2.99318	3.16305	1.72034	2.94008	3.05484	4.28333	2.80641	2.59596	3.09456	2.87896	2.96267	3.81601	3.70106	2.72072	3.27371	Tumor	BRCA
TCGA-AR-A0TY-01A	2.90805	2.8403	2.27564	2.73304	3.25405	4.04089	5.38861	3.98219	3.33546	2.88256	3.30899	4.79114	4.06976	4.13128	3.11616	3.8125	3.84216	Tumor	BRCA
TCGA-A2-A0YG-01A	4.16273	2.68231	2.8068	2.96911	3.15359	3.94386	4.85389	4.27174	3.09245	2.43618	3.50634	4.3876	3.32924	4.35901	3.3521	3.31264	3.61731	Tumor	BRCA
TCGA-B6-A0WZ-01A	3.44482	2.73521	2.70994	2.73333	2.89878	4.28557	3.46146	3.40439	2.74502	1.99923	3.37179	4.3631	3.74558	2.77018	3.00914	2.93946	3.05532	Tumor	BRCA
TCGA-A7-A5ZX-01A	4.79744	2.68672	2.77887	2.98648	2.12257	3.60189	4.06428	3.91381	3.10184	2.72825	3.01415	3.97786	3.80944	2.77279	3.28256	3.69127	3.19238	Tumor	BRCA
TCGA-AC-A23G-01A	3.89675	2.10111	2.33582	2.47572	2.03464	3.0918	3.76161	3.24937	2.40018	2.12025	2.66597	3.42528	3.15191	2.82435	2.32422	3.29354	2.66756	Tumor	BRCA
TCGA-GM-A2DA-01A	4.71651	2.42308	2.68237	2.61971	1.93242	3.20991	3.36328	3.55136	2.96329	1.8862	2.94117	3.7591	3.45065	2.78563	2.87019	3.25734	2.42741	Tumor	BRCA
TCGA-B6-A0X1-01A	5.125	2.41764	3.39613	3.10718	2.93963	3.90295	4.48711	3.90418	2.29357	4.01171	3.79022	4.33467	3.58228	3.62594	4.50271	2.97794	3.1412	Tumor	BRCA
TCGA-AO-A12E-01A	3.67964	2.39087	2.75416	2.97175	2.7333	3.88286	3.97205	3.67701	2.63215	1.58736	3.0804	4.19144	3.49832	3.09886	2.56232	3.76121	3.43645	Tumor	BRCA
TCGA-AR-A250-01A	2.7142	2.57303	2.83541	2.25005	2.91197	3.72442	4.49316	3.86324	2.90095	2.52542	3.20233	4.0209	3.83048	3.19789	3.56524	3.65223	3.33439	Tumor	BRCA
TCGA-A8-A06O-01A	5.39316	2.21119	2.82983	2.43789	2.40448	3.42467	4.06395	3.9217	3.16943	1.97718	3.35538	3.86618	4.00149	3.26201	3.34748	4.12757	3.31744	Tumor	BRCA
TCGA-AO-A12G-01A	3.14841	2.41188	2.61758	2.5163	2.49923	2.89611	3.98563	3.27773	2.38667	2.37538	2.64353	4.04678	2.7808	3.09539	2.3631	3.77285	3.16174	Tumor	BRCA
TCGA-A7-A3IY-01A	3.36379	2.52919	2.90796	2.70751	2.65133	3.87518	4.39086	3.54066	2.68111	2.71896	2.97472	3.82048	3.20058	2.96274	3.12567	3.5737	3.28507	Tumor	BRCA
TCGA-E2-A1IG-11A	3.54325	2.51288	2.51888	2.62287	2.34469	3.27215	4.02873	3.29013	3.00257	2.25171	2.98769	3.81554	3.07584	2.64219	2.51309	3.79121	2.5245	Normal	BRCA
TCGA-BH-A1EY-01A	3.73921	2.29915	2.8389	2.14308	2.5237	3.3183	3.87819	3.63744	2.8098	2.59653	3.04184	3.9465	2.51674	3.77085	2.90481	3.13774	3.20539	Tumor	BRCA
TCGA-A8-A079-01A	4.69238	2.58924	3.16795	2.91693	2.90033	3.51461	3.5384	3.46686	2.76705	2.60697	3.01621	4.10611	3.66559	3.74179	3.19265	3.81296	3.67201	Tumor	BRCA
TCGA-AO-A03P-01A	3.8156	2.37444	3.0113	2.65582	2.63707	3.73503	4.29831	4.02772	2.3371	2.75869	3.19755	4.08771	3.02357	3.41597	3.11001	4.10355	4.03626	Tumor	BRCA
TCGA-E2-A572-01A	4.23867	2.33462	2.14587	2.94621	1.84905	3.70967	3.33539	2.60819	1.41136	0.992309	1.87179	3.20051	4.17757	2.00415	2.59484	2.26942	3.26768	Tumor	BRCA
TCGA-A2-A0YH-01A	4.77237	2.11804	2.68084	2.60174	3.48326	2.96491	4.75785	3.70224	2.76217	3.00664	3.15915	4.54814	3.67275	3.54507	3.29327	3.61405	3.41585	Tumor	BRCA
TCGA-E2-A15G-01A	4.52005	2.80313	3.07909	2.89525	2.90299	3.75587	4.26803	4.15042	3.86135	2.62558	3.66554	4.46702	3.61513	4.20032	3.14331	4.31451	3.22349	Tumor	BRCA
TCGA-C8-A12M-01A	4.59978	2.50892	2.79008	2.49273	2.81647	3.9081	4.41626	4.41174	2.87912	1.7852	3.46993	4.42419	3.08001	4.42774	3.34225	3.77726	3.26347	Tumor	BRCA
TCGA-AR-A0TV-01A	3.42128	2.44185	3.11638	1.77973	2.59833	3.70494	3.67922	3.64561	3.62787	1.68901	3.82376	4.06964	3.33376	3.21261	2.99497	3.7352	3.70362	Tumor	BRCA
TCGA-A7-A13G-01B	3.66009	3.41352	3.25072	2.28198	2.87048	3.46787	3.28204	3.59856	4.3628	1.9611	4.46641	4.35333	3.7203	2.80972	2.99075	3.48598	3.00136	Tumor	BRCA
TCGA-A8-A07E-01A	4.13112	2.61217	2.83465	2.65906	2.69442	3.68581	4.14381	3.80453	3.15877	2.71271	3.29218	4.25638	2.80179	3.37722	2.91101	3.91724	3.02229	Tumor	BRCA
TCGA-E9-A1N9-01A	4.7682	2.51682	3.05711	2.43511	2.74121	4.0243	4.61987	4.04769	2.77912	2.33341	3.47053	4.64442	3.254	2.5001	3.46277	3.31913	3.14434	Tumor	BRCA
TCGA-BH-A0H3-01A	3.4851	2.64	2.9955	2.55648	2.91336	3.75394	4.18759	4.01414	3.61891	2.72417	3.82316	4.43961	3.0231	3.67273	3.22366	4.15007	3.21434	Tumor	BRCA
TCGA-AR-A1AY-01A	4.12283	2.22313	2.75082	2.87154	2.62661	3.49402	4.41862	4.39578	3.00191	3.05222	3.9352	4.08914	3.51746	4.13426	3.97519	3.34838	2.63224	Tumor	BRCA
TCGA-A2-A0D4-01A	5.22905	2.59285	3.22744	2.76006	2.40896	4.04564	3.54971	4.0004	2.41267	2.43173	3.25313	3.54217	3.86925	3.53749	4.08436	3.25499	3.13651	Tumor	BRCA
TCGA-E9-A5UO-01A	4.35998	2.50088	2.88802	3.34322	2.80777	3.81802	4.35389	3.91289	2.83783	2.43122	2.95598	4.1397	4.13996	3.86383	2.59195	3.9617	3.11382	Tumor	BRCA
TCGA-GM-A2DL-01A	4.18632	2.46889	2.73272	2.42339	2.44989	3.62511	4.62325	3.43013	2.35445	2.16452	2.68303	4.19372	2.94978	3.40924	3.26461	3.6313	2.68591	Tumor	BRCA
TCGA-EW-A1PD-01A	5.0458	2.57166	3.01437	2.3775	2.79915	3.69054	4.03133	4.02427	2.81404	2.65225	3.18086	4.4321	3.80583	3.18869	3.39559	3.90289	2.9412	Tumor	BRCA
TCGA-A1-A0SI-01A	3.72368	2.31618	2.40141	2.5645	2.75166	3.60777	4.14906	3.65049	2.68849	2.72123	3.21677	3.99044	3.38061	3.85139	2.85424	3.79724	3.17742	Tumor	BRCA
TCGA-A2-A0CV-01A	3.99943	2.29218	2.4774	2.76184	2.20771	3.3118	4.09467	3.45616	2.63967	2.49219	3.06827	4.0682	3.08661	3.23884	2.67314	3.64965	3.39295	Tumor	BRCA
TCGA-E2-A15E-06A	4.74872	2.2951	3.12543	2.88881	2.87621	4.03303	4.33019	4.23669	3.72195	2.52886	3.36914	4.48763	4.84237	3.52749	3.44876	4.25351	3.46263	Tumor	BRCA
TCGA-AO-A12B-01A	3.39203	2.48922	2.39368	2.9693	2.72865	3.36235	3.33901	3.34233	2.61046	2.31048	2.82257	3.90291	3.92841	2.51878	3.32569	3.00267	3.35945	Tumor	BRCA
TCGA-B6-A408-01A	4.62321	2.72618	2.69558	3.05963	2.52281	3.51292	3.68154	5.02078	4.00986	2.64163	3.37991	3.86045	3.89435	3.61374	3.53433	3.67215	3.28113	Tumor	BRCA
TCGA-OL-A5D7-01A	5.91544	3.20334	2.5209	4.00061	2.12919	4.63054	3.44809	3.97472	2.73162	2.83348	3.19912	3.49583	3.72028	4.24501	3.99336	1.49024	3.38577	Tumor	BRCA
TCGA-A2-A0EW-01A	3.77751	2.6274	2.9438	2.605	2.65047	3.79627	4.17534	3.78782	3.08368	2.0232	3.22648	4.09123	3.04193	3.08447	3.04094	3.9663	3.08237	Tumor	BRCA
TCGA-A2-A0T4-01A	3.29738	2.45954	2.91915	2.45683	2.82325	4.09104	3.95431	3.48718	2.4903	2.01315	2.93206	3.97384	3.14486	3.01408	3.28049	4.01109	3.31036	Tumor	BRCA
TCGA-C8-A131-01A	4.67627	2.40309	2.70535	2.47267	2.61232	4.07506	3.9842	3.41794	2.32794	2.30523	2.97802	3.82208	2.99247	3.42091	2.72513	3.30559	3.17525	Tumor	BRCA
TCGA-BH-A1EN-01A	3.52046	2.20756	2.33478	2.67028	3.15868	4.0785	3.536	3.29497	2.05769	2.26475	2.59211	4.4021	2.93901	3.44308	3.73566	3.62906	3.38723	Tumor	BRCA
TCGA-D8-A3Z5-01A	4.60296	2.72913	2.72293	3.66442	1.99265	3.20256	3.52134	3.67143	3.43579	2.92705	3.19866	3.58038	4.19328	3.50038	3.04112	3.75783	3.00849	Tumor	BRCA
TCGA-E9-A247-01A	4.14952	2.4747	3.27727	3.61683	2.92855	4.12143	3.74272	4.11162	2.74323	3.17033	3.42251	4.5701	3.51383	3.4178	3.39809	4.3087	4.03534	Tumor	BRCA
TCGA-C8-A12Q-01A	3.33394	2.51725	3.03719	2.39303	2.22913	3.82679	4.39982	3.58847	2.78785	2.42688	3.24157	3.76515	2.40688	3.62377	2.78366	4.38515	3.47789	Tumor	BRCA
TCGA-E2-A1BD-01A	4.39024	2.44653	2.83918	3.01664	1.80164	3.75075	3.50738	3.69821	2.67847	2.20623	3.4481	3.77344	3.66731	3.1015	2.73983	3.55294	3.28216	Tumor	BRCA
TCGA-E9-A1RI-01A	3.48795	2.27633	3.08584	2.18347	2.9866	3.80563	4.23327	4.01221	3.15574	2.54759	3.37116	4.39702	3.34535	3.20242	3.29702	4.10413	3.35031	Tumor	BRCA
TCGA-BH-A18M-11A	4.04737	2.64912	2.76204	2.94527	2.35065	3.42234	4.64048	3.64871	3.65173	2.45832	3.46955	4.02727	3.3296	2.87932	2.8617	4.01764	3.01511	Normal	BRCA
TCGA-E2-A105-01A	4.00414	2.73955	2.85391	2.67888	3.16839	4.20533	4.88735	4.00387	2.8752	2.0258	3.28152	4.65863	3.46345	3.01425	3.56543	3.9494	3.30488	Tumor	BRCA
TCGA-D8-A1JK-01A	3.33504	2.21043	2.29588	2.72061	3.30541	3.94797	4.70861	3.28293	2.08986	2.51881	2.91755	4.29863	2.87224	3.50262	2.40767	3.24451	4.01206	Tumor	BRCA
TCGA-E9-A1N9-11A	3.4426	2.65693	2.66633	2.73337	2.31648	3.23381	4.09176	3.63897	3.615	2.22027	3.07041	4.01295	3.40554	2.96438	2.70728	3.85476	2.87896	Normal	BRCA
TCGA-BH-A0BJ-01A	3.4945	2.44792	2.43285	2.7098	2.41612	3.7181	4.56224	3.80504	3.03001	3.03643	2.93365	3.60341	3.24433	3.44911	3.18514	3.79447	3.24753	Tumor	BRCA
TCGA-S3-AA14-01A	4.16917	2.15499	2.65832	2.76706	2.65287	3.50037	4.20509	3.46091	2.91359	2.36253	2.84692	3.75056	3.72092	3.41436	3.16873	3.79027	3.11969	Tumor	BRCA
TCGA-C8-A26V-01A	3.50071	2.64957	3.18559	2.52904	2.95775	4.22632	5.20083	3.79275	2.80325	2.72202	3.22177	4.68528	3.15117	4.06301	3.0041	3.00602	3.412	Tumor	BRCA
TCGA-BH-A1FB-01A	3.90709	2.50087	2.74758	2.19469	2.99466	3.66598	4.51043	3.82617	3.31024	2.53745	3.40892	4.31105	3.23382	3.16861	3.12488	3.73128	3.02456	Tumor	BRCA
TCGA-D8-A1JP-01A	4.39758	2.47577	2.64469	2.41737	2.73562	3.6984	4.12717	4.05339	2.45553	2.77131	2.50424	3.71337	2.85338	2.73327	3.24723	3.9303	3.39936	Tumor	BRCA
TCGA-E2-A14X-01A	4.99492	2.39576	2.9445	2.26616	2.85265	3.97449	4.56389	3.82432	3.07231	2.83625	3.60595	4.44179	2.74849	3.6079	2.97188	3.30928	3.4774	Tumor	BRCA
TCGA-BH-A0E2-01A	4.02817	2.06062	3.10434	2.50503	3.1575	3.4104	4.35124	4.09027	2.37543	2.51442	2.90447	4.53398	3.10558	3.6503	3.32573	4.07764	3.17727	Tumor	BRCA
TCGA-PL-A8LZ-01A	4.51235	2.95232	2.78911	2.71753	2.55829	4.49701	4.42186	3.80567	3.23735	3.53689	3.55634	3.8977	3.82501	3.81417	4.38996	2.9618	3.32102	Tumor	BRCA
TCGA-LL-A740-01A	4.18741	2.49923	2.77247	3.27941	2.50622	3.66891	3.62895	3.67695	3.16718	2.94158	2.82552	4.01953	3.45084	3.22743	3.11258	3.82884	2.6346	Tumor	BRCA
TCGA-BH-A0AZ-11A	3.93869	2.73954	3.19739	2.60618	2.55445	3.38296	4.73906	4.00682	3.63994	1.92066	3.49164	4.29481	3.49891	2.9798	2.93747	3.77924	3.01045	Normal	BRCA
TCGA-D8-A1X7-01A	3.00481	2.54406	3.13283	2.40691	3.25393	4.15022	5.42598	3.87252	3.21503	2.58241	3.64993	4.62243	3.43535	3.09932	3.77419	4.12886	3.19548	Tumor	BRCA
TCGA-AO-A0JD-01A	2.9536	2.90617	3.61224	3.37406	4.65604	4.66638	4.46878	4.14862	2.49832	2.49386	3.57961	4.89766	2.7402	4.32963	3.9568	3.36919	3.69577	Tumor	BRCA
TCGA-D8-A1X5-01A	4.31714	2.50865	2.51355	1.68065	3.23614	3.61417	3.92793	3.51305	3.19215	1.88728	3.09873	4.8012	3.33923	3.5346	3.3533	2.98442	3.89558	Tumor	BRCA
TCGA-E9-A22E-01A	3.16643	1.96816	2.56287	1.84763	2.25456	3.1166	3.63786	3.30592	2.25084	2.32191	2.76163	3.71831	2.59996	2.81569	2.63803	3.18855	3.21004	Tumor	BRCA
TCGA-AC-A23E-01A	3.18305	2.19455	2.73906	2.11442	2.68636	3.67944	3.93841	3.56981	2.58586	2.30192	3.04976	4.46484	3.03694	3.08868	2.84318	3.93334	2.88929	Tumor	BRCA
TCGA-AR-A0U2-01A	3.35785	3.07349	3.14054	2.36788	3.85769	3.92496	4.87447	4.70907	3.18469	2.32817	3.88336	4.98946	3.60368	3.27927	4.63633	3.91889	4.09575	Tumor	BRCA
TCGA-A2-A1FV-01A	3.12779	2.59503	2.68878	2.76658	2.39611	3.82773	4.13614	4.70036	3.62217	1.95059	3.63811	4.45802	2.73419	3.0117	3.96003	3.80375	2.95013	Tumor	BRCA
TCGA-A8-A09B-01A	4.08896	2.27888	3.05655	2.67974	2.87245	3.59456	3.73763	3.77679	3.05316	2.08812	3.49895	4.292	3.71397	3.62737	3.13336	3.5745	3.1828	Tumor	BRCA
TCGA-AN-A0XO-01A	3.81215	2.54741	2.92974	2.36181	2.8013	3.90185	4.72035	3.8463	2.92635	2.28993	3.10228	4.38891	3.23766	3.74765	3.01639	3.60002	3.16613	Tumor	BRCA
TCGA-A7-A425-01A	5.16029	2.68204	2.58514	3.66927	1.89625	3.22655	3.95583	3.76298	3.01815	2.58374	3.25276	3.22312	3.95275	3.86377	3.01058	3.52411	3.19022	Tumor	BRCA
TCGA-BH-A0DD-11A	3.35834	2.30643	2.23828	2.65841	2.27102	3.13272	3.66583	2.73407	2.75271	1.98568	2.74023	3.57104	2.68161	2.28969	2.11198	3.5248	2.24131	Normal	BRCA
TCGA-A2-A0CZ-01A	3.8759	2.28139	2.56915	2.51801	2.45121	3.3724	3.61314	3.63673	2.33896	2.27611	2.75578	3.61401	3.15435	2.6507	2.58592	3.62674	3.01631	Tumor	BRCA
TCGA-GM-A3NY-01A	4.3576	2.40576	2.85518	2.69877	2.20817	3.64852	3.52033	3.23368	3.00236	2.02474	3.8342	3.68462	3.78479	3.17186	3.17411	3.52219	2.82673	Tumor	BRCA
TCGA-AR-A0U0-01A	4.84879	2.77175	3.21041	3.5505	3.12479	4.76727	4.51065	3.83498	2.51649	2.60127	3.03049	4.22625	3.61576	3.49017	3.44969	3.1337	3.21853	Tumor	BRCA
TCGA-AR-A24P-01A	3.35712	2.41649	3.02339	2.4218	3.04759	3.87693	4.45295	4.06085	3.22217	2.52482	3.63443	4.31253	3.18159	3.40775	3.39464	3.76037	3.30126	Tumor	BRCA
TCGA-AN-A0G0-01A	4.1036	2.64188	3.13421	3.08483	3.62493	3.89022	4.34659	3.93555	2.95214	2.36649	3.24905	4.55574	3.10834	3.21348	3.23828	3.61359	3.14781	Tumor	BRCA
TCGA-AN-A0AM-01A	3.65113	2.28938	2.6228	2.05442	2.76711	3.7122	4.17155	4.88875	2.22112	2.64933	3.12811	3.99815	3.37529	3.48674	2.99745	3.29257	3.09013	Tumor	BRCA
TCGA-BH-A0E6-01A	3.43029	2.37239	2.18226	3.84178	2.11046	4.67512	2.96035	3.81429	2.20916	2.64947	2.93003	3.56756	3.27261	3.79279	3.45162	3.75833	3.37663	Tumor	BRCA
TCGA-E9-A248-01A	4.35523	2.70658	3.19037	2.25246	3.53275	4.08533	4.28771	4.24233	3.03661	2.86794	3.42137	4.82778	3.49339	3.00851	3.55846	3.44044	5.22986	Tumor	BRCA
TCGA-B6-A1KN-01A	4.63477	2.38699	2.98691	2.70274	2.83325	4.71751	5.1318	4.34941	3.19921	2.66096	3.17689	3.82102	3.3503	4.80438	3.52614	3.6856	3.8306	Tumor	BRCA
TCGA-LL-A9Q3-01A	4.78066	2.38582	2.42828	3.18788	2.04051	3.3105	3.4291	3.1855	2.06034	2.26646	2.5861	3.68178	4.36461	2.58527	3.25323	3.18115	2.83163	Tumor	BRCA
TCGA-A8-A08B-01A	3.11471	2.68478	3.11088	2.74705	3.11867	4.42595	3.9447	4.0075	3.20681	3.14082	4.22266	4.34139	3.30109	3.88851	4.13795	4.36643	3.68381	Tumor	BRCA
TCGA-A1-A0SG-01A	4.71578	2.4238	2.76907	2.20774	2.80266	3.72185	3.71235	3.4839	2.97566	2.43917	3.14426	4.10578	3.77132	3.23192	2.87084	3.63475	3.05448	Tumor	BRCA
TCGA-BH-A0H0-01A	4.95029	2.73289	3.11468	3.07744	3.16293	3.92094	4.33593	4.05614	2.8498	2.02138	3.49601	4.54517	4.25104	3.43283	3.50834	4.07836	3.46243	Tumor	BRCA
TCGA-D8-A1XR-01A	3.74105	2.5355	2.4706	2.5392	3.13028	3.67826	4.01593	3.94392	3.32427	2.7289	3.75972	4.3156	3.14038	4.0122	3.17799	4.12984	3.53701	Tumor	BRCA
TCGA-C8-A12P-01A	4.29427	2.59937	2.08523	2.8229	2.99411	4.50015	3.5236	3.49453	2.9144	3.15373	3.26616	4.17229	2.93589	3.94908	3.04428	3.49365	3.27222	Tumor	BRCA
TCGA-BH-A0BJ-11A	3.88859	2.60969	3.16448	2.60302	2.37118	3.62389	4.54335	3.59784	3.70762	2.57843	3.56552	4.09563	3.1007	3.1629	3.03748	4.02776	3.23915	Normal	BRCA
TCGA-LL-A50Y-01A	4.19527	2.76827	2.67037	3.45396	2.32324	3.9724	3.12585	3.44772	3.07538	2.74624	2.60786	3.43863	3.59511	3.13334	3.36942	3.57	3.41026	Tumor	BRCA
TCGA-AO-A03N-01B	2.55242	2.00512	1.92922	2.26871	2.70731	3.9514	3.73572	3.40577	2.19984	2.44013	2.86055	4.14656	2.27128	3.17162	2.58374	3.50127	3.23696	Tumor	BRCA
TCGA-E2-A1IU-01A	3.77913	2.67896	3.04581	2.37217	2.8158	3.8782	4.13268	3.7367	3.23882	1.76499	3.21516	4.33859	3.25021	3.50583	3.28117	4.01823	3.19238	Tumor	BRCA
TCGA-EW-A1IX-01A	3.86169	2.52941	2.96322	2.42485	2.45172	3.39692	4.37715	3.65408	3.38633	2.28966	3.27095	3.86503	3.60464	3.09693	2.67782	3.82512	2.98825	Tumor	BRCA
TCGA-A2-A0EV-01A	3.2654	2.67213	3.03859	2.80285	3.09522	3.85141	4.89452	4.07271	2.33232	2.69558	3.12461	3.93519	3.50053	4.10758	3.02042	3.64004	3.47988	Tumor	BRCA
TCGA-BH-A0BT-11A	3.49992	2.63752	2.80992	2.7423	2.64657	3.63947	4.88312	3.91423	3.41207	2.82283	3.29157	4.15304	3.39922	3.07396	3.07209	3.91857	3.27377	Normal	BRCA
TCGA-AC-A3W5-01A	4.68141	2.37965	2.75504	3.08944	2.43288	3.41597	3.4071	3.66803	2.53598	2.25257	2.92511	3.70959	3.3618	3.01113	2.76108	3.63835	3.25183	Tumor	BRCA
TCGA-AR-A2LN-01A	3.80652	2.76116	2.80283	2.50331	2.45071	3.0386	4.02043	4.51517	3.49767	2.32772	3.23577	4.15112	3.56014	2.62813	3.05103	3.85826	2.86972	Tumor	BRCA
TCGA-E9-A1QZ-01A	2.9225	2.42222	3.19749	2.79173	2.58154	4.00675	4.28271	3.77974	2.81004	2.72843	3.36935	3.95132	2.58571	3.70928	3.32086	3.82584	3.73947	Tumor	BRCA
TCGA-BH-A8FY-01A	4.59926	2.62478	2.61115	2.7385	2.18504	3.65637	3.44859	3.63126	3.5504	1.42952	2.98584	3.85638	3.24679	3.47518	3.06132	3.61587	2.98444	Tumor	BRCA
TCGA-AC-A6IX-06A	3.67694	2.47555	3.1874	2.87374	2.89669	3.4015	3.83315	3.94248	3.08078	2.91396	3.45815	4.13721	3.38314	3.97932	2.56708	3.93562	3.32206	Tumor	BRCA
TCGA-AR-A1AL-01A	3.73941	2.69491	3.11573	2.48883	2.54507	3.63253	4.49228	4.13806	3.29545	2.62395	4.00999	4.03011	3.2136	3.22553	3.26752	4.03898	3.08258	Tumor	BRCA
TCGA-BH-A42T-01A	4.61376	2.27809	3.02449	2.6897	1.93167	4.00013	3.5655	3.72794	2.25473	2.13624	2.88604	3.46476	4.35787	3.66492	2.97639	4.16542	3.29977	Tumor	BRCA
TCGA-BH-A0B9-01A	4.22425	2.79863	3.72917	3.09449	2.36376	5.07415	5.23163	3.89201	2.56618	3.55825	3.4182	3.70074	2.84108	3.6998	3.24574	4.01831	3.52162	Tumor	BRCA
TCGA-BH-A0BS-11A	3.68533	2.67544	2.9326	2.89372	2.47413	3.52075	4.6274	3.64798	2.90632	2.40217	2.75773	4.05577	3.36745	3.01826	2.75291	3.74522	3.21022	Normal	BRCA
TCGA-AO-A0J8-01A	3.7564	2.58675	3.24226	2.64746	2.93284	3.98745	3.78053	3.72878	3.11933	2.65252	3.4685	3.99375	3.48296	3.39122	3.18419	3.92592	3.42844	Tumor	BRCA
TCGA-BH-A2L8-01A	4.06705	2.71354	2.90506	2.96476	2.71948	4.03093	3.582	3.87864	2.75521	2.43248	3.04166	4.04828	3.86533	3.38711	3.48111	3.98971	3.15414	Tumor	BRCA
TCGA-E9-A1N5-01A	4.88032	2.2845	2.75089	2.50864	2.63695	3.72085	4.20253	3.70313	2.72935	1.98853	3.79897	4.17763	3.68981	3.76739	3.28726	3.91834	3.44387	Tumor	BRCA
TCGA-A8-A075-01A	4.69642	2.7524	3.27416	2.30489	3.4898	3.51046	4.01829	4.04551	3.20173	3.16204	3.47618	4.64648	4.18107	3.07408	3.27017	3.90456	3.63018	Tumor	BRCA
TCGA-AN-A0FZ-01A	4.96947	2.5646	3.14911	2.34837	2.87127	3.78173	4.65219	4.87344	3.43615	2.29663	3.82188	4.19175	2.99779	3.81726	3.41627	3.16475	3.88678	Tumor	BRCA
TCGA-D8-A1XJ-01A	3.97884	2.52259	2.71161	2.28407	3.37634	3.86705	4.01584	3.52411	2.4746	2.58864	3.82064	4.50728	3.57182	3.52869	3.81187	3.76593	2.93525	Tumor	BRCA
TCGA-E2-A15F-01A	4.30616	2.6281	2.96823	2.66728	2.50313	3.96188	5.46262	3.92622	3.15225	2.50789	3.41194	4.03982	3.4108	3.65149	3.51644	3.82498	2.50992	Tumor	BRCA
TCGA-A2-A0EP-01A	4.29013	2.52093	2.55757	2.89438	2.15083	3.24027	3.66364	3.42761	2.95158	2.31402	3.09863	3.63218	3.37873	2.64654	2.65982	3.58171	2.73245	Tumor	BRCA
TCGA-BH-A18K-01A	3.84733	2.42075	2.73959	2.92729	2.99917	3.72384	4.00593	3.92112	2.95115	2.69158	2.68967	4.23491	2.89803	3.49572	3.30276	3.60326	3.41934	Tumor	BRCA
TCGA-AR-A5QN-01A	5.02447	2.64245	2.43403	3.07842	2.93256	3.59269	3.67291	3.84972	3.20924	2.8363	3.53929	4.0965	3.7361	3.6829	3.18626	3.84139	3.15953	Tumor	BRCA
TCGA-E9-A244-01A	3.94537	2.30602	3.55503	2.91357	2.04004	3.43817	4.29173	4.16787	2.7465	2.66702	2.85472	3.37001	3.08779	2.32768	3.28384	3.52857	3.45887	Tumor	BRCA
TCGA-A8-A0A2-01A	3.87041	2.6938	3.18288	3.04989	2.99066	3.3257	4.04855	4.27741	3.4864	2.28898	3.39184	4.71323	3.45087	3.55994	3.12164	4.09294	3.58884	Tumor	BRCA
TCGA-B6-A40C-01A	5.44541	2.44063	2.85651	3.52305	2.37816	3.54618	3.24633	3.81305	2.93272	3.07355	3.50016	3.47122	4.13087	3.12771	2.86286	3.8754	3.21794	Tumor	BRCA
TCGA-AR-A2LQ-01A	3.623	2.4053	2.5574	2.34995	2.5946	2.74649	3.8532	3.30159	2.6735	2.43232	2.98817	3.77409	3.59535	2.63665	2.7897	3.73755	2.72585	Tumor	BRCA
TCGA-EW-A1J6-01A	2.86404	1.76936	2.43369	2.1824	1.86825	3.18107	3.94591	3.79208	3.45356	2.33142	3.2416	3.68632	2.37729	2.84655	3.88881	2.69868	3.47845	Tumor	BRCA
TCGA-EW-A1IZ-01A	3.84806	2.90366	3.06234	3.03638	2.22634	3.73206	3.99741	3.65985	2.90173	2.48134	3.16728	3.86056	3.44342	3.18831	3.44125	3.8242	3.16807	Tumor	BRCA
TCGA-AC-A2FG-01A	3.67327	2.69941	2.88288	2.72779	2.58231	3.53588	4.36015	3.74498	3.29985	2.60844	3.46176	4.067	3.44798	3.12644	3.11964	3.86375	3.20574	Tumor	BRCA
TCGA-A8-A09Z-01A	4.00885	2.33074	2.56474	2.27556	2.44971	3.29011	3.64571	3.16503	2.6996	2.67956	2.48778	3.98739	3.88919	3.25772	2.15339	3.88397	2.78242	Tumor	BRCA
TCGA-EW-A1P1-01A	3.70133	2.52712	2.8628	2.50763	2.53842	3.8134	4.26813	3.51364	3.12558	2.55487	3.33623	4.07234	3.38746	2.89718	2.87736	3.76606	2.65936	Tumor	BRCA
TCGA-A8-A0A9-01A	4.34232	2.75545	3.40523	1.91849	2.94526	3.86862	3.96668	4.85384	3.14039	2.29397	3.61232	4.49218	3.86689	3.53256	3.19436	3.59208	3.65603	Tumor	BRCA
TCGA-BH-A0DT-01A	4.36594	2.47469	2.9266	2.73367	2.65826	3.89953	4.05033	3.83866	2.77711	2.58661	3.4142	4.3101	3.29953	3.33364	3.04517	4.03146	3.13607	Tumor	BRCA
TCGA-A2-A0T2-01A	4.10527	2.07246	2.51061	2.90673	2.07219	4.54657	3.33846	3.51727	1.73406	2.09286	3.10876	3.62568	3.34067	3.10793	2.79	3.76562	3.3117	Tumor	BRCA
TCGA-A7-A4SA-01A	4.47695	2.56367	2.66331	2.80209	1.94196	2.78479	3.7351	3.6212	2.95316	2.57316	3.09001	3.44675	3.72121	3.06121	3.43328	3.66791	3.57	Tumor	BRCA
TCGA-D8-A27F-01A	4.3732	2.94861	3.23684	2.75549	3.06782	4.3393	5.49711	3.75183	2.91032	2.44278	3.51389	4.38053	2.816	3.78467	3.81688	4.66488	3.56814	Tumor	BRCA
TCGA-D8-A146-01A	3.55102	2.50022	2.90179	2.44367	2.868	3.33706	4.13706	3.83704	3.33814	2.41538	3.5186	4.34441	3.06818	3.21073	3.11252	3.89647	3.20335	Tumor	BRCA
TCGA-D8-A27E-01A	3.20826	2.55139	2.75647	2.02288	2.7431	3.48388	4.59216	3.56152	3.09537	2.04179	2.98905	4.12148	3.17931	2.71624	3.11076	3.51604	3.06485	Tumor	BRCA
TCGA-C8-A138-01A	4.07711	2.41923	2.33532	2.27977	2.70068	3.73054	3.53604	3.46871	2.98115	2.24365	3.4014	4.18214	3.57895	3.50098	3.11924	3.35686	3.85569	Tumor	BRCA
TCGA-E2-A14V-01A	3.67318	2.48289	2.65797	2.76537	2.81853	4.26039	5.34687	4.37951	2.26357	2.42887	3.63776	4.29635	3.35512	3.73071	3.33349	3.88932	4.3178	Tumor	BRCA
TCGA-AC-A5EH-01A	3.70296	2.32332	2.51191	3.06168	2.39967	3.29144	3.54363	3.65107	2.60502	2.55206	3.01869	3.67653	3.42155	3.26806	2.63347	3.47798	3.29399	Tumor	BRCA
TCGA-A2-A0YL-01A	3.5767	2.61604	2.80074	2.6281	2.68996	3.73268	4.45211	3.75697	3.32159	2.56677	3.30257	4.27899	3.07781	3.43489	2.96385	3.71982	3.17958	Tumor	BRCA
TCGA-E2-A1LK-01A	6.31303	2.59558	2.92789	2.45632	2.99806	4.10694	3.81464	3.43305	3.3323	2.78509	2.90579	3.95795	3.11453	3.53955	3.09539	2.50079	3.40518	Tumor	BRCA
TCGA-D8-A13Z-01A	3.39377	2.93483	1.92388	2.61466	2.9467	4.97971	4.21122	4.15082	2.92637	2.92041	3.88438	4.102	3.15832	4.72422	3.01308	3.90725	3.4414	Tumor	BRCA
TCGA-D8-A27V-01A	4.00611	2.47755	2.77508	2.04649	2.73619	3.50912	4.22408	4.02478	2.87963	2.62136	3.50673	4.60879	3.71359	3.1372	2.88137	3.69152	3.28735	Tumor	BRCA
TCGA-EW-A3U0-01A	4.34745	2.80476	2.96011	3.30184	2.47342	3.73621	3.74129	3.79532	2.87543	2.69389	3.18076	3.40117	3.60803	3.29651	3.82206	3.80899	3.40765	Tumor	BRCA
TCGA-A2-A4S2-01A	4.54259	2.6436	2.70473	2.77346	2.43052	3.47188	4.13779	3.71165	3.06786	2.00658	3.26384	3.87646	4.53664	3.34921	3.18385	3.61164	3.38922	Tumor	BRCA
TCGA-D8-A1XV-01A	2.9764	2.28243	2.80757	2.3028	2.80972	3.79012	4.24272	3.77077	3.39776	2.44781	3.00175	4.3348	2.6563	2.91968	3.42789	3.60133	3.05922	Tumor	BRCA
TCGA-BH-A1F0-01A	3.42785	2.76468	2.97909	2.70723	2.99249	4.21185	4.44026	3.84523	3.04979	2.89767	3.35622	4.13215	3.43683	3.10916	3.83459	3.49046	3.31971	Tumor	BRCA
TCGA-AN-A0FT-01A	4.3694	2.18803	2.51845	1.7305	2.27059	4.00098	3.53774	3.24931	2.15939	2.0381	2.55202	3.41285	3.87795	2.34647	2.35324	3.23463	4.99133	Tumor	BRCA
TCGA-A7-A0D9-11A	2.66084	2.46029	2.3073	2.76945	2.15047	3.41302	3.59611	2.71045	2.71617	2.10636	2.79662	3.46568	2.42969	2.52752	2.42773	3.56058	2.29893	Normal	BRCA
TCGA-E2-A15K-01A	4.13563	2.74486	3.14518	2.82603	3.38496	4.09358	3.86425	3.85748	2.40779	2.27697	3.76893	4.56298	3.85048	4.04824	2.89485	3.98274	3.34533	Tumor	BRCA
TCGA-BH-A0DL-01A	4.42195	2.84505	2.38602	3.29925	3.07413	4.09585	4.59357	3.65148	2.95171	2.88375	3.53445	4.18982	2.95976	4.1051	2.78398	3.40095	3.28884	Tumor	BRCA
TCGA-A2-A0EY-01A	4.46383	2.53012	2.46562	2.69015	2.28763	3.8106	3.50763	3.96934	2.74885	3.05401	3.05365	4.06853	4.05094	3.01773	3.81041	3.32404	3.40909	Tumor	BRCA
TCGA-B6-A0IG-01A	5.00648	2.74734	3.08321	2.92137	2.85483	4.11894	4.76586	3.61861	2.52337	2.44592	3.23115	4.06031	3.68832	3.4898	4.23729	3.72215	3.56147	Tumor	BRCA
TCGA-BH-A0HI-01A	3.47099	2.47603	2.87056	2.26778	2.87608	3.82849	3.88043	3.53841	2.81055	2.36555	2.8919	4.2122	2.87656	3.65066	3.08572	3.92053	3.19854	Tumor	BRCA
TCGA-E2-A576-01A	5.64445	2.56718	2.1879	3.73225	2.11146	4.18719	2.92782	3.50022	2.43211	2.10213	2.57521	3.70342	4.24037	2.97241	3.09335	3.05348	3.26345	Tumor	BRCA
TCGA-BH-A201-01A	3.55945	2.73227	3.24935	2.4567	3.04398	3.8007	4.75156	4.00115	3.69676	2.58494	3.36453	4.23745	2.89654	3.76337	3.33436	4.19632	3.15661	Tumor	BRCA
TCGA-D8-A1JB-01A	3.35791	2.5588	2.92023	2.5047	3.09481	3.63081	5.00876	4.13079	2.98035	2.7122	3.32601	4.40712	3.27266	3.22471	3.02483	4.01315	3.73751	Tumor	BRCA
TCGA-A1-A0SN-01A	3.89619	2.31266	2.68094	2.86379	2.80897	3.58273	3.99315	3.91911	2.98026	3.04744	3.05333	4.42153	3.61671	3.03904	3.5791	2.09914	4.20366	Tumor	BRCA
TCGA-A8-A08A-01A	3.87088	2.54373	2.68751	2.67626	2.42232	3.62182	3.48156	3.70487	2.8685	2.58034	3.05165	3.64697	3.36688	3.33299	3.01675	3.88044	3.19028	Tumor	BRCA
TCGA-A2-A0YI-01A	3.37582	2.53349	2.70749	2.29956	2.84074	3.62408	4.49902	3.78849	2.82754	2.75266	3.12173	4.14948	2.98674	2.76773	3.28431	3.81414	3.15307	Tumor	BRCA
TCGA-AR-A1AN-01A	4.02785	2.74473	2.71456	2.53141	2.54191	3.00361	3.91661	3.66198	3.24427	2.69847	2.99176	4.56715	2.79766	3.22265	2.94461	3.36049	2.5771	Tumor	BRCA
TCGA-AR-A2LM-01A	4.08364	2.47925	3.05664	2.47431	2.81881	3.39661	3.96553	3.97613	3.01249	2.03577	3.53906	4.39475	3.37128	3.36113	2.97595	3.83347	2.98585	Tumor	BRCA
TCGA-AR-A5QQ-01A	4.09572	2.35686	2.19248	3.44644	2.48227	3.62713	3.95697	3.28948	1.83095	2.67144	2.25174	3.53584	3.00237	3.92153	2.89263	2.81143	2.66095	Tumor	BRCA
TCGA-AR-A0TR-01A	3.86537	2.78044	2.95567	3.30239	2.4018	3.7442	5.22764	4.32695	4.06318	2.77165	3.84739	4.16439	3.48069	4.01527	3.46339	4.07116	3.46971	Tumor	BRCA
TCGA-GM-A3XG-01A	4.08815	2.71056	2.71488	3.18537	1.89016	3.59331	3.939	3.69065	2.79841	2.64986	2.87392	3.52199	3.68582	2.72105	3.26879	3.25952	3.31183	Tumor	BRCA
TCGA-BH-A1FC-01A	5.16398	2.31235	3.37504	3.21235	2.71923	4.50977	4.20194	4.46873	2.43181	3.355	3.51097	3.77996	4.62584	3.81178	2.88337	3.56156	3.1407	Tumor	BRCA
TCGA-A2-A0D1-01A	5.46551	2.86586	3.1425	2.72055	2.91274	4.10593	4.19506	3.64139	3.0716	2.1449	3.25169	4.17972	3.10948	2.76646	3.06866	3.88179	3.28275	Tumor	BRCA
TCGA-EW-A1P7-01A	4.30366	2.97001	2.82332	2.42062	2.36759	3.26848	3.96416	3.6555	2.94554	2.28626	2.95073	3.99216	3.40015	2.83818	3.39089	3.48778	2.98493	Tumor	BRCA
TCGA-AR-A1AP-01A	4.78066	2.63313	2.91678	2.71387	2.29521	3.8189	3.90966	3.73651	2.96292	2.46693	2.93571	3.72688	3.50357	3.54591	2.88723	3.81435	3.42142	Tumor	BRCA
TCGA-E2-A150-01A	4.74887	2.56991	2.74306	2.23787	2.84268	3.84656	4.82638	3.42672	2.57877	2.65583	3.33602	4.26046	3.557	3.83056	2.79099	3.16936	3.13851	Tumor	BRCA
TCGA-EW-A2FW-01A	3.23606	2.34118	3.13531	2.9571	2.94461	3.55855	4.79103	3.88424	2.50434	2.75981	2.93405	4.41892	3.31459	3.78478	3.69662	4.04892	4.40872	Tumor	BRCA
TCGA-AR-A1AV-01A	3.56262	2.30975	3.45778	2.38338	2.69992	3.75444	4.59171	4.10431	2.9278	2.74819	3.66289	4.31505	3.5938	3.92714	3.02798	3.79556	3.12419	Tumor	BRCA
TCGA-A2-A0T1-01A	3.28288	2.27108	2.15001	2.87728	2.52466	3.67133	4.57626	3.40986	2.58648	2.60409	2.94002	3.75417	3.40253	2.49734	3.06863	3.72676	3.18188	Tumor	BRCA
TCGA-BH-A0BM-11A	3.74255	2.70829	2.73398	2.87263	2.20811	3.37403	4.74608	3.66383	3.12568	2.79367	3.22095	3.99752	2.96725	2.93082	2.71295	4.01664	3.13516	Normal	BRCA
TCGA-BH-A0C0-11A	3.94995	2.69303	2.86812	2.8172	2.39803	3.29163	4.74534	4.00957	3.468	2.82481	3.51529	4.1653	3.37994	3.23819	2.72989	4.05256	3.19566	Normal	BRCA
TCGA-AO-A0JF-01A	3.4013	2.33942	2.69586	2.28582	2.88468	3.58684	4.35001	3.62496	2.9938	2.72613	2.87709	4.25175	2.66727	3.31678	3.04526	3.99241	3.14358	Tumor	BRCA
TCGA-OL-A6VR-01A	5.38149	2.58688	2.7874	3.37303	2.31227	3.70703	4.36926	3.74197	3.10629	2.48988	2.77857	3.50209	4.08997	3.70332	3.3118	3.63564	3.24644	Tumor	BRCA
TCGA-A8-A090-01A	3.90539	2.50485	3.11284	2.40038	2.62338	3.62888	4.16987	3.84169	3.57419	2.44094	3.28533	3.85562	3.52075	3.77437	3.27024	4.10231	3.51924	Tumor	BRCA
TCGA-BH-A0BG-01A	4.24803	2.78115	3.38176	2.65376	2.7476	3.8301	4.85113	4.06685	2.52034	2.77444	3.16711	4.35981	3.72798	2.9622	3.10916	3.71027	3.01585	Tumor	BRCA
TCGA-AO-A1KP-01A	4.20485	2.51389	2.91731	2.52524	3.08328	4.27135	4.2007	4.25465	3.36203	2.35387	4.20978	4.75195	2.78323	3.19295	3.71036	3.96245	3.55724	Tumor	BRCA
TCGA-LL-A441-01A	4.64031	3.03809	2.9164	3.83551	2.01428	3.68434	4.28355	4.57514	3.8031	3.16535	3.76603	3.75936	3.83536	3.3096	3.26122	3.52438	2.84598	Tumor	BRCA
TCGA-C8-A133-01A	3.33276	2.25727	2.73685	2.42902	2.37477	3.57134	3.67251	2.90653	2.23216	2.33071	2.42613	3.92057	3.19779	3.18142	3.09677	3.54024	3.03991	Tumor	BRCA
TCGA-BH-A8FZ-01A	4.37828	2.05566	2.79543	2.64301	2.22629	3.43441	4.13696	4.11098	3.28195	2.54056	3.12963	3.7786	3.95643	2.81658	2.71485	3.72923	2.77603	Tumor	BRCA
TCGA-E2-A1II-01A	4.67489	2.56354	2.80163	4.12193	2.90332	4.8712	4.34888	4.59286	3.07596	3.69318	3.32799	4.45881	3.37803	3.59888	3.84397	3.2954	3.69836	Tumor	BRCA
TCGA-EW-A6SC-01A	3.81926	2.41731	3.29475	2.4346	2.06328	3.41517	4.03281	3.91717	2.65203	1.76299	3.36819	4.39307	3.63285	3.78973	3.04622	3.73376	2.65594	Tumor	BRCA
TCGA-AN-A0XT-01A	3.94269	2.35994	2.23002	2.28779	2.02757	3.0511	3.96039	4.21731	3.62469	2.57779	3.73025	3.95199	3.4707	3.41091	3.04788	3.48032	3.2281	Tumor	BRCA
TCGA-BH-A0RX-01A	3.88733	2.06204	2.49161	3.13032	2.32201	4.66741	4.45328	3.61518	2.07634	2.95901	2.62516	3.57978	2.54876	3.43594	3.03678	3.93715	3.42099	Tumor	BRCA
TCGA-A8-A08X-01A	4.28459	2.52197	3.61582	2.69606	2.95283	4.0479	3.52551	3.55672	2.77615	2.38394	3.0126	4.10662	3.84679	3.32537	3.21717	3.62255	3.46649	Tumor	BRCA
TCGA-AO-A03V-01A	4.41725	2.75723	3.17405	2.58761	2.61586	3.68201	4.77723	3.65853	3.25909	2.5385	3.45213	4.18023	2.73875	3.69427	2.64315	4.35335	3.91225	Tumor	BRCA
TCGA-EW-A1PH-01A	4.65258	2.60208	4.14733	2.84889	2.58939	4.58314	4.54498	3.76831	2.74425	3.13428	3.08933	4.30582	3.20881	3.43272	3.79584	2.77792	3.8259	Tumor	BRCA
TCGA-A2-A0ST-01A	3.66627	2.64024	2.89995	3.03143	2.48631	3.90944	4.69622	3.91054	2.89618	2.81233	3.21309	4.18287	3.49291	3.3162	4.16689	3.79782	3.27993	Tumor	BRCA
TCGA-BH-A0BC-01A	3.52797	2.46321	2.84566	2.6274	2.45781	3.57633	4.80129	3.67405	3.71951	2.69484	2.7907	4.35138	3.057	3.56472	2.73574	3.88893	3.03595	Tumor	BRCA
TCGA-E9-A1NH-01A	3.16724	2.59425	2.6768	2.34721	2.80085	3.79072	3.75617	3.81725	3.09288	2.29746	3.23178	4.24717	3.23143	3.69966	2.85248	4.06565	3.14293	Tumor	BRCA
TCGA-B6-A0X5-01A	4.19765	2.53352	2.68362	2.58515	3.19658	4.25426	5.05646	3.69364	3.53701	2.58555	2.9928	4.39488	3.39452	3.16111	3.51883	3.92454	3.2518	Tumor	BRCA
TCGA-AC-A4ZE-01A	4.97082	2.84906	2.98093	2.94696	2.93376	3.46152	4.07387	3.83252	3.28089	2.77915	3.29052	4.12482	3.83754	3.42601	3.35696	3.9943	3.24965	Tumor	BRCA
TCGA-A8-A07Z-01A	3.75501	2.48686	2.44989	3.22641	2.28967	3.73362	4.42204	3.60482	2.34664	2.57266	3.1901	3.48509	3.52865	3.65309	3.02726	3.86636	3.82134	Tumor	BRCA
TCGA-OL-A66P-01A	4.172	2.23209	2.02757	3.42358	1.63563	3.70693	3.23558	3.00254	1.67941	2.0328	2.05524	3.11223	4.40364	2.68754	2.57021	2.77384	3.44181	Tumor	BRCA
TCGA-E2-A1LE-01A	4.24777	2.67383	2.68506	3.09899	2.19086	3.83106	3.74987	3.97707	2.42987	2.34845	2.80254	3.2438	3.71668	3.18658	2.60639	3.53356	3.06522	Tumor	BRCA
TCGA-C8-A8HR-01A	4.18652	2.44603	2.71938	3.0624	2.14765	3.18766	4.75423	3.68135	3.15048	2.33775	3.15371	3.57933	3.6464	2.94982	3.11575	3.76964	3.35095	Tumor	BRCA
TCGA-BH-A0H7-11A	4.34843	2.54671	2.92212	2.76128	2.27051	3.59759	4.40401	3.4097	2.96848	2.69516	3.3191	3.81473	3.09784	3.10791	2.94583	3.86629	3.72125	Normal	BRCA
TCGA-A8-A09T-01A	4.10795	2.53132	3.29746	1.89024	3.10359	4.03934	4.50872	3.8514	3.16873	2.45706	3.50353	4.51575	3.40183	3.61058	3.54307	3.62718	3.13032	Tumor	BRCA
TCGA-BH-A0HB-01A	4.90486	2.28474	3.04838	2.6794	2.66676	4.18978	4.18567	3.58007	2.2743	2.60672	2.6129	4.04851	2.72949	4.01703	2.93352	3.77518	3.58551	Tumor	BRCA
TCGA-A8-A08G-01A	4.42602	2.69506	2.97953	2.90236	3.1081	3.78813	3.85737	3.90694	2.9862	2.13984	3.31919	4.25452	3.05279	3.49757	3.10436	4.08697	3.2668	Tumor	BRCA
TCGA-A2-A0EQ-01A	4.08422	2.50671	2.71613	2.94065	2.23792	4.03334	4.25396	4.07866	3.53	2.51158	2.88369	3.56378	3.26564	3.64807	3.4758	3.79766	3.03043	Tumor	BRCA
TCGA-A8-A081-01A	4.24066	2.65969	2.55621	2.85157	3.03178	4.85286	4.61434	4.00985	2.7453	3.11782	3.44201	4.59805	3.86973	3.78054	3.45246	4.05629	3.89594	Tumor	BRCA
TCGA-AO-A1KO-01A	3.0969	2.45514	2.56221	2.17199	2.6145	3.33119	4.56989	3.77862	3.21228	2.38774	3.2935	4.33769	2.76438	2.36233	2.80326	3.32041	3.07693	Tumor	BRCA
TCGA-BH-A0HW-01A	4.07653	2.39434	3.09128	2.80858	3.11968	3.46557	4.713	3.9925	3.32909	2.4218	2.99259	4.28898	3.83986	3.4656	3.39347	3.87556	3.4944	Tumor	BRCA
TCGA-OL-A66H-01A	4.08826	2.46344	2.68382	3.33825	2.35848	3.62169	4.10096	3.67111	2.77736	2.38704	2.59666	3.69761	4.05627	2.87562	3.41609	3.42848	3.09095	Tumor	BRCA
TCGA-A2-A0T0-01A	4.70869	2.19179	2.93382	3.31218	3.10925	5.64842	4.31925	4.45177	2.56112	2.99313	3.07653	4.25145	3.36964	3.28304	3.89881	3.81474	3.35494	Tumor	BRCA
TCGA-A7-A0DB-11A	3.26609	2.297	2.2321	2.66212	2.22933	3.32838	3.96444	3.07197	2.70015	2.14498	2.57957	3.64385	2.76332	2.49217	2.25436	3.58926	2.519	Normal	BRCA
TCGA-AN-A04C-01A	4.6501	2.88225	3.05233	2.68657	2.63976	4.06014	4.18246	3.94073	2.65719	2.89091	3.67719	3.74188	3.76449	3.36398	3.55178	3.61462	3.41447	Tumor	BRCA
TCGA-E2-A573-01A	4.27678	2.51301	3.24472	3.11212	2.3719	4.60906	4.32925	3.96085	2.34302	2.596	3.01535	4.11709	3.30353	3.4292	3.49899	3.64851	3.6006	Tumor	BRCA
TCGA-AN-A0XS-01A	4.97536	2.72816	2.66586	2.36895	2.74566	3.83401	3.98322	3.6879	3.24846	2.37427	3.57665	4.46975	4.0152	3.4856	3.10057	3.77934	3.17946	Tumor	BRCA
TCGA-D8-A3Z6-01A	5.18499	2.46373	2.77965	3.29719	2.67461	3.38303	3.29082	3.8046	2.98865	1.98514	3.07667	4.06966	3.3823	3.53404	3.1394	3.68031	2.69649	Tumor	BRCA
TCGA-EW-A3E8-01B	4.68111	2.67758	2.81417	2.96019	2.52884	3.39399	3.9242	3.73257	3.26159	2.06331	3.25394	3.97467	4.07396	2.93282	3.13858	3.57293	3.0663	Tumor	BRCA
TCGA-C8-A137-01A	1.89268	2.72498	2.85181	3.19417	3.20357	4.17708	3.45187	3.95259	2.73783	2.01172	2.66467	4.49019	3.06555	3.41284	3.17986	3.6163	3.28258	Tumor	BRCA
TCGA-GM-A4E0-01A	4.03865	2.36597	2.62319	2.93272	2.16067	3.05997	3.39735	3.33489	3.12266	2.03739	2.83592	3.58802	3.48924	2.45586	2.79389	3.11247	2.68262	Tumor	BRCA
TCGA-E2-A1B4-01A	4.12017	2.75951	2.94197	2.88713	2.37753	3.76519	3.427	3.62783	3.62175	2.28333	3.25627	3.97785	3.48804	3.07717	3.28673	3.41892	3.11155	Tumor	BRCA
TCGA-EW-A2FS-01A	4.07452	2.56872	2.84973	2.56683	2.06832	3.67768	3.5674	3.81616	2.58575	1.69009	3.52925	3.50467	3.41302	3.07087	3.7398	2.97151	3.05263	Tumor	BRCA
TCGA-S3-A6ZG-01A	4.434	2.64263	3.44738	2.5464	2.69748	3.6769	4.54116	4.20615	3.18472	2.38036	4.12998	4.25262	3.53152	3.63934	3.30661	4.22755	3.55539	Tumor	BRCA
TCGA-BH-A209-11A	3.09011	2.47219	2.69649	2.55443	2.742	3.48225	4.74406	3.66279	3.2531	2.60495	3.36982	4.25797	2.86957	2.78556	2.94342	3.82914	2.99712	Normal	BRCA
TCGA-GM-A3XN-01A	3.99461	2.4882	2.77404	3.40243	2.28942	3.39197	3.5983	3.67373	2.95643	2.37847	3.43392	3.49294	3.71762	2.79479	3.08949	3.53499	2.89043	Tumor	BRCA
TCGA-EW-A1P8-01A	4.7619	2.35595	4.66582	3.48515	2.38984	4.36466	4.21947	3.87266	2.70368	3.54611	3.36701	3.94174	3.99729	3.96694	3.78882	4.16166	2.91739	Tumor	BRCA
TCGA-E2-A156-01A	3.74285	2.77949	3.07934	2.36465	2.98123	3.75161	4.14958	4.03569	3.63129	2.6468	3.7132	4.58831	3.57358	3.85578	3.22196	4.25869	3.304	Tumor	BRCA
TCGA-AC-A8OP-01A	4.46395	2.68728	2.70359	3.10641	2.27948	2.99086	3.55801	3.8904	3.9007	2.42196	3.06202	3.69567	3.37651	3.10927	3.48767	3.6076	3.25228	Tumor	BRCA
TCGA-AN-A0FS-01A	3.44232	2.29684	2.84019	2.72037	2.85985	3.65731	4.12148	3.83557	3.04752	4.33976	3.01956	4.18779	3.30369	3.26748	2.9862	4.16602	3.43192	Tumor	BRCA
TCGA-E2-A15M-11A	3.33812	2.44171	2.64338	2.51698	2.483	3.21571	4.43049	3.13684	3.38726	2.14796	3.24551	3.9921	2.85172	2.46327	2.65968	3.62817	2.718	Normal	BRCA
TCGA-B6-A0IM-01A	3.34866	2.46015	2.97029	2.76573	2.80837	3.51175	3.76848	4.00194	2.62592	1.91119	3.43641	4.331	3.08676	5.28125	2.88721	3.93254	3.04892	Tumor	BRCA
TCGA-E9-A3HO-01A	4.80636	2.06424	2.83528	2.92081	1.28288	2.8787	3.33701	3.54111	3.0517	2.5404	3.31271	3.43326	3.28515	3.20746	2.92919	3.55392	3.14777	Tumor	BRCA
TCGA-E2-A1L7-11A	3.88636	2.81216	2.94324	2.77658	2.41654	3.51303	4.5183	3.70019	3.12992	2.18118	3.02932	4.05595	3.58477	2.86772	3.00288	3.83396	3.0038	Normal	BRCA
TCGA-D8-A27K-01A	3.69363	2.54878	2.84437	2.89544	3.03931	3.84092	4.27151	4.01129	3.21449	2.60746	3.78589	4.46839	3.18243	3.35031	3.23264	3.89193	3.42141	Tumor	BRCA
TCGA-E9-A2JT-01A	4.23913	3.02266	2.94128	2.88227	2.7693	3.54822	4.50486	4.08929	3.75996	2.78686	3.48246	4.36226	3.71722	3.30578	2.96399	4.13866	3.1606	Tumor	BRCA
TCGA-BH-A1EN-11A	3.29023	2.51371	2.49261	2.88179	2.4157	3.21063	4.32005	3.2965	3.09052	2.38849	3.09678	3.61508	2.95457	2.62543	2.41006	3.78627	2.73133	Normal	BRCA
TCGA-GM-A2DK-01A	3.53213	2.20665	2.46986	2.60607	1.69458	3.43443	4.08247	3.30154	2.55302	2.24109	2.68413	3.40668	2.80301	2.63428	3.01349	3.0115	2.54302	Tumor	BRCA
TCGA-AR-A1AK-01A	4.02193	2.58061	2.89274	2.62762	2.83235	3.61805	4.07007	3.71027	3.10962	2.40691	3.32834	4.16669	3.37166	3.3896	3.08433	3.56182	3.74675	Tumor	BRCA
TCGA-E2-A15R-01A	3.58132	2.48079	3.19461	2.81848	3.08798	3.89068	3.70269	4.06977	2.83008	2.30534	3.43077	4.90567	2.51729	3.56247	3.47504	4.16755	3.84022	Tumor	BRCA
TCGA-BH-A18Q-01A	4.44855	2.71437	2.701	2.14318	2.34879	3.55681	5.55068	4.21202	3.16136	2.12434	3.78073	4.07764	3.99668	2.93024	3.29221	3.67156	3.40972	Tumor	BRCA
TCGA-BH-A0DV-11A	3.54334	2.75282	3.27236	2.55502	2.73234	3.34299	4.77977	4.03997	3.53602	2.17846	3.44652	4.46766	3.09335	3.07009	2.99428	3.91143	3.05324	Normal	BRCA
TCGA-E2-A153-01A	3.9237	2.28984	2.56565	2.19967	2.31069	3.52763	3.66096	3.35548	2.43697	2.1047	2.96977	3.91837	3.25851	2.90368	2.63485	3.53612	3.22911	Tumor	BRCA
TCGA-BH-A0BT-01A	4.19771	2.33614	3.05406	3.03903	3.27606	3.9257	3.85706	3.86925	2.77073	3.16601	3.25696	4.43594	4.13346	3.86063	3.02192	3.72352	3.60959	Tumor	BRCA
TCGA-E9-A54Y-01A	6.4219	1.92258	1.46943	3.04654	2.2035	3.58739	2.56955	2.70119	3.03858	2.04147	2.25878	3.04463	4.02776	2.81227	2.9426	2.60789	2.82754	Tumor	BRCA
TCGA-E2-A14Q-01A	3.78016	2.69159	2.96616	2.44914	2.94974	4.01779	4.51788	3.74037	3.3582	2.45588	3.59411	4.41472	3.18903	3.76372	3.15394	3.72271	3.20501	Tumor	BRCA
TCGA-BH-A0HN-01A	4.11592	2.4309	2.63067	2.87711	2.45773	3.45971	3.80383	3.58818	3.21416	1.99439	3.64386	3.99666	3.63061	3.3591	2.6212	3.18037	3.51097	Tumor	BRCA
TCGA-E2-A1IK-01A	3.40739	2.3535	2.5617	2.61566	2.60287	3.77254	4.27193	3.48876	2.42162	2.49431	2.52192	3.95701	3.46478	3.10429	3.20549	3.59615	3.08878	Tumor	BRCA
TCGA-E2-A10C-01A	4.65848	2.43549	2.72459	2.9213	2.6478	4.05572	3.4856	4.69731	2.6811	1.89466	3.75396	4.15751	3.22502	3.43064	3.1152	4.25914	3.29136	Tumor	BRCA
TCGA-A8-A095-01A	3.62766	2.68633	2.87372	2.98807	3.51513	4.30997	5.06186	4.05577	3.22878	2.62565	3.83913	4.51115	3.3376	3.67714	3.51104	4.26358	3.61836	Tumor	BRCA
TCGA-BH-A0DH-11A	3.19105	2.58163	2.68431	3.11645	1.86783	3.53611	3.79864	2.90642	2.76449	2.51636	2.65415	3.43328	3.11194	3.04678	2.6984	3.25315	2.90377	Normal	BRCA
TCGA-A7-A0DB-01A	3.42988	2.67642	2.69384	2.64382	3.40855	3.74581	3.97797	3.83633	3.62614	2.75697	3.10358	4.26267	3.31931	3.19921	3.14383	3.62306	3.63763	Tumor	BRCA
TCGA-BH-A18J-01A	3.52354	2.5732	2.90817	2.82715	2.16062	3.68852	3.75031	3.34047	3.02085	2.39535	3.05015	4.48635	3.45706	3.36436	2.64264	3.49338	3.01295	Tumor	BRCA
TCGA-BH-A28O-01A	4.80434	2.76011	2.62898	3.02914	2.14042	3.15905	4.13877	3.77946	3.19861	2.46277	3.20201	3.72442	3.75979	2.62639	2.83568	3.75083	2.94116	Tumor	BRCA
TCGA-AC-A3TN-01A	4.86029	2.76338	2.61871	3.27407	2.14006	3.56862	3.12869	3.38121	3.08347	2.69228	2.61435	3.4003	3.88651	3.13961	3.26245	3.53622	3.23625	Tumor	BRCA
TCGA-A7-A13E-01A	5.17469	2.69207	3.20823	2.92746	2.98864	4.91781	4.77985	3.80927	4.24988	2.46277	3.16492	3.72465	3.45322	3.0902	2.66414	3.68447	3.71749	Tumor	BRCA
TCGA-BH-A0W5-01A	4.53952	2.6924	2.69738	2.43229	2.63702	3.6892	4.38209	3.93568	3.42589	2.76126	3.58561	4.12557	3.4546	3.31909	2.95408	3.73269	3.36667	Tumor	BRCA
TCGA-GM-A2DD-01A	3.68671	2.2093	2.33842	3.23278	2.18588	4.30285	3.53708	3.35887	2.77532	2.41282	3.1282	3.83676	2.87113	3.6851	2.80348	3.64064	2.84796	Tumor	BRCA
TCGA-AN-A0XV-01A	3.15461	2.43337	2.88995	2.32416	2.839	3.86154	4.85182	3.78888	3.57887	1.91862	3.19708	4.27234	3.25691	3.32658	3.20259	3.72717	3.23356	Tumor	BRCA
TCGA-E2-A1IL-01A	3.11668	2.68953	3.01048	2.7031	2.98611	3.71662	3.97212	3.8976	3.4951	2.7679	3.76206	3.81188	3.58299	3.60138	2.78069	4.1158	3.3828	Tumor	BRCA
TCGA-EW-A2FR-01A	3.55121	2.10745	2.67756	2.19647	2.70205	4.08372	4.11298	3.60362	2.34297	3.47434	2.9167	3.82951	2.9603	3.09288	2.63433	3.72298	4.80768	Tumor	BRCA
TCGA-3C-AAAU-01A	4.88275	2.24817	2.51938	3.03792	2.60277	3.33358	4.34216	5.42958	3.21679	2.93238	3.45312	3.81291	3.59802	3.79589	3.2551	3.81754	3.38525	Tumor	BRCA
TCGA-AR-A24W-01A	3.22269	2.35304	2.69333	1.88641	2.66123	3.23601	4.79478	3.85893	3.51665	2.63212	3.51184	4.30672	3.07999	3.55071	3.06188	3.67874	3.16393	Tumor	BRCA
TCGA-OL-A5RZ-01A	5.59001	2.63074	2.99969	3.79166	2.33674	4.18984	4.36702	3.96937	2.55254	2.0761	3.4337	4.00753	4.29085	2.47324	3.95689	3.31829	5.64219	Tumor	BRCA
TCGA-E9-A1RB-01A	3.84294	2.12999	2.4838	2.72535	2.5064	4.27717	4.67071	3.93224	2.99732	2.98217	4.06623	4.10085	2.69902	3.97229	3.62843	4.08393	3.5826	Tumor	BRCA
TCGA-AN-A0AJ-01A	4.83361	2.45914	2.9448	2.51468	2.7617	4.05447	4.37308	4.37448	2.55924	3.90887	3.40125	4.44675	3.44609	3.76482	3.53227	4.52371	3.80813	Tumor	BRCA
TCGA-AR-A1AT-01A	4.48766	2.51067	2.87198	2.68381	2.75283	3.97247	3.66711	3.73692	2.4296	2.41062	2.96095	4.14469	3.87481	3.34294	3.76222	3.83613	2.95085	Tumor	BRCA
TCGA-BH-A1FD-11B	2.77051	2.43623	2.48931	2.48954	2.37462	3.53812	4.45455	3.57837	3.18219	2.40952	3.35372	3.92164	2.61837	2.33255	2.657	3.45837	3.11329	Normal	BRCA
TCGA-A8-A09Q-01A	4.67114	2.0535	2.47121	2.5044	2.77264	3.07856	3.71058	3.95549	3.1635	2.31476	3.16876	4.25832	3.29881	3.71807	3.40985	3.6738	2.77751	Tumor	BRCA
TCGA-A8-A083-01A	3.90615	2.96919	2.84599	1.92247	3.11028	4.15285	3.80962	3.64012	3.73031	2.52495	3.63147	4.19754	3.59796	3.93851	3.52085	4.02247	3.86334	Tumor	BRCA
TCGA-AN-A0XL-01A	4.41653	2.51473	2.75315	3.08124	1.98765	3.64076	3.93856	3.76148	3.06416	2.87564	3.37408	4.07167	3.29627	3.19943	3.09256	4.09851	3.36039	Tumor	BRCA
TCGA-E9-A1RC-01A	3.98001	2.51462	3.24645	2.58166	3.1774	3.6716	4.71408	4.18801	3.5766	2.51493	4.19601	4.37293	3.06978	3.9699	3.14163	3.5993	3.97324	Tumor	BRCA
TCGA-D8-A27I-01A	4.25626	2.4643	2.64409	2.78742	2.34432	3.48033	4.24879	3.84811	3.18694	2.6894	3.25326	3.75639	3.20643	3.41205	3.00566	3.46926	3.41278	Tumor	BRCA
TCGA-A2-A04Y-01A	3.77128	2.44186	2.95843	2.17314	2.52747	3.76403	4.04751	3.79715	2.91159	1.79973	3.29823	4.35024	3.16012	2.37298	3.29068	3.32655	2.78443	Tumor	BRCA
TCGA-PE-A5DC-01A	5.56704	2.80054	2.86409	2.99351	1.94635	3.02257	3.65877	3.89198	2.66509	1.69444	3.26274	1.71838	3.34735	3.12611	3.39551	4.25855	3.6574	Tumor	BRCA
TCGA-OL-A5D8-01A	5.84297	2.6838	2.62028	2.75223	2.56366	4.63079	3.42138	4.07092	3.28096	1.97879	3.26094	4.46516	3.7498	3.56614	3.06902	3.4474	2.85589	Tumor	BRCA
TCGA-A7-A26E-01A	3.02348	2.95896	3.24553	2.05454	3.25802	4.2212	4.74754	4.14636	3.70025	2.12973	3.14287	4.7651	2.73175	3.67356	3.00251	3.73176	3.22954	Tumor	BRCA
TCGA-AN-A0FL-01A	4.71007	2.15829	2.4848	2.93749	2.67503	2.54621	3.93051	3.31227	3.22838	2.79519	2.56351	3.84606	3.46836	2.76351	3.15755	2.87962	3.2635	Tumor	BRCA
TCGA-A8-A0A1-01A	3.73429	2.68073	2.94065	1.93924	3.03374	3.80659	3.9721	3.68275	3.58197	2.53513	3.22313	4.25866	3.33998	3.50262	3.02909	3.91343	3.3816	Tumor	BRCA
TCGA-AN-A0FN-01A	3.07851	2.37268	2.74138	2.31195	2.70646	3.52388	3.93951	3.635	2.74048	2.26261	2.70359	3.91102	2.89867	2.84823	2.79801	3.84498	2.90603	Tumor	BRCA
TCGA-D8-A1J9-01A	3.48291	2.59986	2.80585	2.14572	2.98794	3.92472	3.4325	4.04321	2.95191	2.64993	3.38806	4.16414	3.24593	3.32809	3.43163	3.44024	3.25898	Tumor	BRCA
TCGA-BH-A1EO-01A	4.0816	2.26227	2.55187	2.16599	3.24766	3.64907	4.44172	3.80776	2.73492	2.52281	2.87383	4.56713	2.81974	3.0718	2.90775	3.42073	3.1627	Tumor	BRCA
TCGA-B6-A0I2-01A	5.34357	2.73183	2.38589	3.5653	1.86575	4.38561	3.61177	3.75736	2.79797	3.02203	3.03321	3.62133	3.83161	3.43506	3.70404	2.89131	3.63601	Tumor	BRCA
TCGA-E9-A5UP-01A	4.80873	2.39124	2.79436	2.43259	2.84959	3.2967	3.54014	3.47699	3.12069	2.39269	3.54747	4.30382	3.80717	3.23113	3.10185	3.64456	3.43943	Tumor	BRCA
TCGA-A2-A0T5-01A	4.35219	2.43125	2.77589	2.73119	2.69354	3.93678	3.91798	3.74816	2.48649	2.68399	3.33235	4.17422	3.49315	3.48852	3.42672	3.44026	3.26419	Tumor	BRCA
TCGA-A7-A0DA-01A	4.67178	2.69039	2.54649	2.91178	2.17081	3.67031	4.74936	3.93859	3.02173	2.63427	3.09328	4.17739	3.52014	2.67473	2.95285	2.52741	3.08738	Tumor	BRCA
TCGA-BH-A1FJ-11B	1.97724	2.47823	2.59926	1.87257	2.82499	3.68474	5.14117	3.80104	3.67524	2.0074	3.44352	4.66117	2.1473	2.16812	2.84318	3.49329	3.21787	Normal	BRCA
TCGA-B6-A0IC-01A	3.88133	2.91532	2.93104	1.94871	2.86974	3.80069	4.11316	3.95777	3.98129	2.53928	3.71421	4.29636	3.69568	3.64986	3.15979	3.93063	3.49058	Tumor	BRCA
TCGA-BH-A1FH-11B	3.21804	2.38174	2.64108	2.58251	2.3819	3.32635	4.51831	3.5095	3.23023	2.4038	3.4974	4.15735	2.88631	2.34892	2.45463	3.72276	2.95699	Normal	BRCA
TCGA-BH-A5J0-01A	4.30546	2.53144	2.81622	2.46161	2.25691	3.14937	3.59976	3.39293	1.99564	2.60317	2.40107	3.51075	3.7028	2.95444	2.88287	3.29311	3.33953	Tumor	BRCA
TCGA-A2-A0CY-01A	4.28793	2.01379	2.44132	2.2294	1.94807	3.49689	4.03647	3.64135	2.36222	2.76178	2.74901	3.43044	2.56943	3.19394	3.21728	2.98319	2.90263	Tumor	BRCA
TCGA-E9-A245-01A	3.80599	2.42968	2.5794	2.54785	2.60876	3.7448	3.96918	3.52793	2.92475	2.66865	2.72921	4.03305	3.56202	2.86734	3.26944	3.46171	2.90836	Tumor	BRCA
TCGA-GM-A3NW-01A	4.17607	2.61177	2.70495	3.0905	2.68733	3.57518	3.41663	3.79213	4.29216	2.3633	2.68797	3.95487	3.05321	3.33462	3.131	3.91961	3	Tumor	BRCA
TCGA-A1-A0SB-01A	4.08074	2.7221	2.89911	2.57234	2.43719	3.81668	4.76651	4.15988	3.30157	2.62752	3.50031	3.92844	3.46909	3.49629	3.21481	3.92454	3.05576	Tumor	BRCA
TCGA-BH-A0B8-11A	2.92446	2.33483	1.98002	2.66077	2.29789	3.38324	3.71611	2.89587	2.74077	2.22029	2.64594	3.53892	2.5583	2.33759	2.17916	3.53808	2.25672	Normal	BRCA
TCGA-OL-A66N-01A	4.76817	2.34188	2.35587	3.33433	1.70736	3.41929	2.95574	3.15857	2.05984	2.25948	2.48742	2.98798	3.53675	3.53746	2.58765	3.01378	3.43758	Tumor	BRCA
TCGA-A2-A0CQ-01A	3.92295	2.51221	3.03026	2.66022	2.58269	3.93477	3.27755	3.84703	2.99582	2.21307	3.29234	3.76671	3.42688	3.46731	3.23006	3.22667	3.11255	Tumor	BRCA
TCGA-C8-A1HG-01A	4.28454	2.08173	2.59966	2.72611	2.16448	4.08654	4.19611	3.86602	2.30517	2.40738	3.03076	3.97302	2.71151	3.39286	3.46305	3.84902	3.46497	Tumor	BRCA
TCGA-AC-A2BK-01A	4.71265	3.03854	3.29443	3.29188	2.53088	5.0869	4.17626	4.35033	3.19448	2.06111	3.31375	4.13699	3.22445	5.75788	4.46524	3.19319	3.23454	Tumor	BRCA
TCGA-A8-A08J-01A	4.33197	2.56261	3.12508	2.70124	2.75246	3.72173	3.77744	3.87116	2.65404	3.21245	2.81757	4.074	3.91327	3.7483	3.15899	3.54317	4.0178	Tumor	BRCA
TCGA-A8-A09V-01A	4.32982	2.73672	3.13035	2.59473	2.87127	3.54645	4.36782	4.30486	3.86391	2.74283	4.26063	4.41987	3.6338	3.16439	3.16256	4.08801	3.40799	Tumor	BRCA
TCGA-A2-A0T3-01A	4.5768	2.4	3.97427	3.21393	3.54422	4.14655	5.28892	3.91945	2.71203	3.44658	3.78161	4.81627	4.80866	3.78097	3.86631	3.37489	4.46378	Tumor	BRCA
TCGA-AC-A2FM-11B	4.12348	2.58888	2.52304	3.28011	1.7574	3.31539	3.7158	3.08161	2.59684	2.77593	2.7324	3.24977	3.57065	2.90714	2.78452	3.56524	3.04932	Normal	BRCA
TCGA-C8-A1HK-01A	3.93211	2.41074	2.87872	2.76303	3.19386	5.00577	4.97352	4.42861	2.59351	2.57043	3.77213	4.67863	3.0146	3.37051	3.21131	4.03706	3.5997	Tumor	BRCA
TCGA-AN-A04A-01A	4.10754	2.43713	2.83924	1.97729	3.12796	3.74121	4.1833	3.63328	2.36181	2.28258	3.16984	4.3054	3.25123	2.7886	2.90474	3.83886	3.53296	Tumor	BRCA
TCGA-E9-A1RG-01A	4.30973	1.74811	2.67029	3.2655	2.10711	3.50503	3.48509	3.09639	2.38365	2.87975	2.81472	3.64751	3.15678	3.81999	2.74208	3.04655	3.86995	Tumor	BRCA
TCGA-JL-A3YW-01A	4.24956	2.27433	2.95425	3.42706	1.99694	3.88162	3.77736	3.40288	2.81629	2.13616	2.90684	3.33097	3.66546	3.10314	3.09606	3.4006	3.056	Tumor	BRCA
TCGA-E2-A154-01A	4.04786	2.58263	2.56265	2.8896	2.66597	3.93764	4.10572	3.85691	3.23387	2.33447	3.5484	4.4234	3.38485	3.54749	3.09305	3.7389	3.37173	Tumor	BRCA
TCGA-A2-A04U-01A	3.2138	2.58095	3.67798	4.26576	1.51156	4.47733	3.7637	3.76253	1.64877	3.09038	2.43893	4.31163	3.19166	3.89667	5.64337	3.89469	2.97892	Tumor	BRCA
TCGA-BH-A0EE-01A	3.9756	2.32592	2.91147	2.73282	3.27568	3.70277	4.06327	3.67422	2.27028	2.02666	3.25479	4.527	2.82877	3.73182	3.37179	4.12874	3.80942	Tumor	BRCA
TCGA-BH-A0H5-01A	3.92871	2.81722	2.95103	2.79665	2.8116	3.79872	4.23464	3.64433	3.07113	2.6871	3.10547	4.30341	3.65614	3.20455	3.18847	4.12312	3.17021	Tumor	BRCA
TCGA-EW-A1IW-01A	3.63592	2.63882	2.96283	2.74469	3.1998	4.17594	4.20459	4.01749	2.58906	2.04711	3.10924	4.48979	3.69406	4.35096	3.31857	4.03117	3.3592	Tumor	BRCA
TCGA-AO-A0J4-01A	4.02648	2.99551	3.81464	2.9016	2.96001	3.53069	4.96559	3.65542	3.15999	2.68793	3.49171	4.18022	3.43422	3.48784	3.04441	3.69081	3.42965	Tumor	BRCA
TCGA-A7-A3J1-01A	4.17483	2.55542	3.03924	2.8592	2.19969	3.40842	3.94744	3.9753	3.20604	2.68579	3.37202	3.68812	3.45536	3.24182	3.0652	4.13798	3.0939	Tumor	BRCA
TCGA-E9-A243-01A	2.99255	2.29548	3.06832	2.03297	3.38159	4.14561	4.34763	3.77066	2.96839	2.80332	3.62408	4.53052	2.5669	3.52117	3.64458	3.53683	3.29801	Tumor	BRCA
TCGA-C8-A134-01A	5.02368	2.82471	3.34035	3.6898	2.34181	4.2995	4.42611	4.07642	2.87849	2.93994	3.53596	3.99804	3.73074	3.59338	3.25626	3.25545	4.02937	Tumor	BRCA
TCGA-BH-A1FC-11A	3.26948	2.36573	2.40104	2.79834	2.45424	3.44289	4.54114	3.54857	2.9791	2.67656	3.10766	4.00827	2.90068	2.72503	2.67581	3.85994	3.08419	Normal	BRCA
TCGA-D8-A1Y1-01A	4.28216	1.96272	2.96678	2.8907	2.80189	3.64182	3.89226	3.60758	2.91434	2.91364	3.16588	3.87226	3.00733	3.53396	3.30352	3.65645	3.66332	Tumor	BRCA
TCGA-AO-A12A-01A	3.76026	2.4337	2.87305	2.44702	2.64098	3.62136	4.19266	4.00935	3.36981	2.74523	3.70906	4.25742	3.37311	3.18907	3.50424	4.08255	3.47152	Tumor	BRCA
TCGA-E2-A108-01A	4.1079	2.51686	2.63345	2.37138	2.70277	3.66555	4.35536	3.47019	2.77567	2.52295	2.86311	3.84601	3.07295	3.20827	2.83262	3.64405	3.07703	Tumor	BRCA
TCGA-BH-A1F8-11B	3.27118	2.35775	2.52692	2.55039	2.46263	3.39604	4.71976	3.65524	3.05663	2.58476	3.30223	4.09026	2.74648	2.51763	2.85044	3.64493	3.09661	Normal	BRCA
TCGA-BH-A0E1-01A	3.26086	2.53513	3.0782	2.61766	2.93211	4.02086	3.64294	3.628	2.56221	2.21074	2.9946	4.38086	3.03457	3.15661	3.26694	3.61893	3.26446	Tumor	BRCA
TCGA-BH-A204-11A	2.52689	2.19815	2.32286	2.43703	2.09954	3.02043	3.96511	2.91441	2.86044	2.08294	3.00157	3.59437	2.39566	1.97778	2.23632	3.45901	2.48673	Normal	BRCA
TCGA-E2-A14U-01A	4.25217	2.77198	2.76078	3.08688	2.324	3.4598	4.15296	3.66449	3.16487	2.69846	3.37507	3.86452	4.04722	3.09072	3.04372	3.66958	3.14799	Tumor	BRCA
TCGA-BH-A0HL-01A	4.3604	2.63766	2.87243	2.69452	2.14703	4.28375	4.47652	3.73852	2.81231	1.48026	3.15016	4.73701	3.50639	3.578	3.61238	3.8917	4.06203	Tumor	BRCA
TCGA-E9-A229-01A	3.55716	2.56449	3.17956	2.54095	2.50062	3.82933	4.5698	3.99173	3.60698	2.75177	3.63661	3.85443	3.56088	3.31191	3.33764	4.06504	4.13426	Tumor	BRCA
TCGA-A8-A08T-01A	2.87658	2.63488	3.19892	2.54221	3.00236	3.80841	4.12759	4.151	3.1429	2.56076	3.66611	4.32939	3.28674	3.38423	3.44915	3.82398	3.19337	Tumor	BRCA
TCGA-E9-A1RF-01A	2.82392	2.45414	2.70656	2.15974	2.71213	3.90687	4.07299	3.85412	2.78887	2.59257	3.04833	4.10265	3.59946	3.14181	3.0954	3.02625	3.72315	Tumor	BRCA
TCGA-A2-A04T-01A	4.88207	3.01933	4.02667	2.87534	2.32437	4.13076	5.92072	4.23688	2.87345	2.82609	3.12603	4.05946	2.84339	3.679	3.61143	3.43665	3.84939	Tumor	BRCA
TCGA-E2-A15P-01A	3.69029	2.6109	3.04001	2.39434	2.22216	3.80676	4.25464	3.90389	3.59214	2.66957	3.49589	3.48981	3.65768	3.63911	3.15615	3.41829	3.43485	Tumor	BRCA
TCGA-C8-A3M8-01A	3.85389	2.54603	2.8731	2.67755	2.82588	3.68569	3.98288	3.61676	2.24216	2.45051	2.95246	4.3248	3.64765	3.80472	3.07477	4.07285	3.45737	Tumor	BRCA
TCGA-LL-A5YO-01A	4.93345	2.56103	3.08024	3.48471	2.65205	3.67857	3.69623	3.76713	2.61666	2.84938	3.28435	4.42558	3.97386	2.97264	3.21675	3.88099	3.16827	Tumor	BRCA
TCGA-OL-A66L-01A	4.78224	2.3431	2.19666	3.40618	1.66975	3.72757	3.09986	3.13327	2.40457	2.43535	2.59869	3.12329	4.12768	2.65311	2.68584	2.89735	3.07305	Tumor	BRCA
TCGA-OL-A66K-01A	4.6979	2.62872	2.51615	3.22978	2.03955	3.78477	3.76382	3.90613	2.25364	2.22394	3.43263	3.32339	3.78079	3.01632	3.22769	3.53661	3.11449	Tumor	BRCA
TCGA-E2-A1LG-01A	3.05661	2.67879	2.59497	2.00693	3.58891	3.99208	4.6514	3.96648	3.06053	2.83369	3.3405	4.62955	3.61761	3.05931	3.38139	3.42463	3.18427	Tumor	BRCA
TCGA-E2-A1LS-01A	2.14381	2.03306	2.3386	1.95264	1.2625	3.28817	3.72917	2.96269	2.00008	4.69529	3.26306	3.50488	1.53573	1.66495	3.10383	2.26075	3.11912	Tumor	BRCA
TCGA-BH-A0H5-11A	3.95012	2.8234	2.8841	2.81254	2.3318	3.42402	4.67493	3.99391	3.74815	2.5324	3.58703	4.17481	3.36028	2.80382	2.87052	3.87517	3.11357	Normal	BRCA
TCGA-A7-A426-01A	5.04538	2.80062	2.9078	3.25458	2.13183	3.28099	3.66474	3.82061	3.52351	2.27369	3.47624	3.64036	4.08409	3.00552	3.11447	3.39147	3.03566	Tumor	BRCA
TCGA-BH-A0B7-01A	2.99475	2.69555	2.48758	2.2883	2.69306	3.78143	4.73287	3.44615	2.57713	2.31053	3.14563	4.16762	3.24765	2.84374	3.20412	4.04291	4.04055	Tumor	BRCA
TCGA-AC-A2FO-01A	4.1952	2.6041	2.86423	2.60691	2.62105	3.50083	4.24284	3.75741	3.28764	2.47893	3.1745	4.26296	3.74622	3.15781	2.92423	3.91963	3.88943	Tumor	BRCA
TCGA-D8-A27L-01A	4.51324	2.52268	2.887	2.31208	2.81959	3.59942	4.00492	3.92324	3.27508	2.5987	3.46683	4.17777	3.28824	3.58226	3.07149	3.85005	3.33065	Tumor	BRCA
TCGA-AC-A2FF-01A	3.24024	2.45881	2.74527	2.63888	2.4444	3.40971	4.30536	3.84169	3.0934	2.75515	3.20712	3.99411	3.04971	2.9561	2.98853	3.93064	3.34538	Tumor	BRCA
TCGA-GM-A2D9-01A	4.30018	2.61876	2.65958	2.06232	2.37354	3.36331	3.32267	4.19731	2.45992	1.60037	3.42776	4.20558	3.86509	2.99364	3.09893	3.64554	2.8466	Tumor	BRCA
TCGA-A2-A0D3-01A	4.36102	2.75315	2.99273	2.41113	3.03508	4.03805	3.93462	4.07982	2.95888	2.91848	3.97976	4.42659	3.46618	3.88975	3.28998	3.85527	3.44396	Tumor	BRCA
TCGA-A7-A0CH-11A	3.44129	2.44509	2.39986	2.83785	2.12877	3.39467	3.93742	2.98658	2.64824	2.49163	2.65284	3.4825	3.06415	2.69913	2.4184	3.66947	2.79359	Normal	BRCA
TCGA-A2-A0EO-01A	3.51121	2.12192	2.70192	2.79875	2.75237	3.37665	4.17529	3.61422	2.76058	2.64782	2.66244	3.98199	2.78552	2.90831	3.1025	3.81365	3.26084	Tumor	BRCA
TCGA-E9-A1NA-11A	3.82373	2.47381	2.50441	2.84378	2.16686	3.2106	4.11464	3.3407	3.05791	2.47153	2.91473	3.82922	3.16789	2.88585	2.31593	3.84687	2.74762	Normal	BRCA
TCGA-A2-A0T7-01A	5.0165	2.55214	2.79309	2.7202	2.69411	3.53961	4.13255	4.08042	2.8895	3.04684	3.36388	4.00855	2.94321	3.32772	2.97786	3.87871	3.86768	Tumor	BRCA
TCGA-OL-A6VO-01A	5.67894	2.64275	3.15758	3.95894	3.06903	4.99569	3.55675	4.26877	2.35497	3.18944	3.00037	4.46038	3.80716	3.7994	4.02283	3.40509	3.49	Tumor	BRCA
TCGA-BH-A0EI-01A	2.7155	2.45368	2.92396	2.28	2.97474	3.68898	4.61807	3.76115	2.6418	1.81323	3.05032	4.1146	2.9105	4.03673	3.19356	4.01272	3.42511	Tumor	BRCA
TCGA-A8-A094-01A	4.31103	2.57269	3.32192	2.16405	3.1579	4.25882	3.89922	3.44827	2.5099	2.63759	3.34758	4.83714	3.22684	3.77574	3.27507	3.8308	3.53635	Tumor	BRCA
TCGA-A8-A092-01A	4.93332	2.29262	2.67338	2.71411	3.40284	3.62607	4.266	4.15862	3.0231	2.87946	3.3355	4.80104	3.74376	4.01229	3.57614	4.31056	3.88235	Tumor	BRCA
TCGA-AC-A3W6-01A	4.65939	2.64287	2.57689	2.96165	2.03512	3.20686	3.42169	3.46648	3.05549	2.29004	2.99219	3.61848	3.57551	2.85752	2.80902	3.47019	2.95169	Tumor	BRCA
TCGA-BH-A0BA-01A	4.39926	2.4259	2.44723	2.63138	3.10589	3.30668	4.21915	4.08043	3.1547	2.49957	3.68417	4.8248	4.17649	4.06756	2.67264	3.69847	3.48248	Tumor	BRCA
TCGA-EW-A1OX-01A	3.46091	2.64259	3.03948	2.5154	3.21502	3.55174	3.91186	3.63437	2.64925	2.09231	3.07615	4.66988	3.70433	3.99798	3.09953	3.7481	3.13109	Tumor	BRCA
TCGA-A2-A0CR-01A	4.32618	2.65608	2.35489	3.3003	1.9469	3.4912	3.30119	2.86434	2.32334	2.34719	2.48093	3.29522	3.85716	3.05299	2.7244	3.15918	3.10275	Tumor	BRCA
TCGA-D8-A1JD-01A	4.41242	2.43441	3.02732	2.37716	3.49149	3.49322	4.40035	3.88535	2.70836	2.52732	3.45644	4.52548	3.16791	2.83764	3.51516	4.1169	3.50372	Tumor	BRCA
TCGA-C8-A26X-01A	3.32237	2.52554	2.48953	2.2881	2.79988	3.73712	3.63857	3.69659	2.48505	2.50418	2.89279	3.95481	2.81213	3.37117	2.62961	3.68041	3.14108	Tumor	BRCA
TCGA-E9-A1RC-11A	2.97774	2.4127	2.19813	2.41959	2.20833	3.36114	3.74218	2.87514	2.66594	2.0731	2.73749	3.5821	2.46161	2.12557	2.29652	3.41195	2.34349	Normal	BRCA
TCGA-A1-A0SE-01A	4.03374	2.55568	3.19593	2.65512	2.76115	4.02588	4.12156	3.81012	2.68901	2.29662	3.48065	4.158	3.28482	3.60356	3.22628	3.89685	3.40427	Tumor	BRCA
TCGA-A7-A4SF-01A	5.72379	2.72055	2.73114	3.64425	2.70238	3.5968	4.28791	4.54266	3.24784	3.11309	3.2414	3.78009	3.71131	4.21511	3.10706	3.51526	4.09562	Tumor	BRCA
TCGA-OL-A66O-01A	4.868	2.39121	2.62447	3.51617	2.02012	4.0139	3.87949	3.73142	2.02863	1.17111	2.23671	3.45025	4.58659	3.7427	3.28964	3.2566	2.98674	Tumor	BRCA
TCGA-C8-A26W-01A	4.518	2.76023	3.21793	2.61901	3.10133	4.22098	4.26378	3.99673	2.71172	2.58603	3.39972	4.32497	3.58511	3.69389	3.68286	3.90588	3.29116	Tumor	BRCA
TCGA-E2-A9RU-01A	4.87761	2.42694	2.28864	3.4826	1.74043	3.58763	3.83668	3.00205	1.56171	1.9206	2.78451	3.15034	3.7386	2.78063	3.1335	2.7196	3.28053	Tumor	BRCA
TCGA-AN-A0FW-01A	3.60331	2.63704	2.72337	2.67223	2.6403	3.51572	4.41675	4.05033	2.88655	3.1313	3.10441	4.42524	3.53549	3.58407	3.10653	3.62622	3.79094	Tumor	BRCA
TCGA-D8-A1JC-01A	4.19985	2.52502	3.12654	2.56141	3.35711	3.92232	4.16136	3.97705	2.72364	2.71955	3.57703	4.4546	3.22997	3.60055	3.41588	4.13171	4.42536	Tumor	BRCA
TCGA-C8-A12V-01A	4.32225	2.85539	2.80484	3.18501	2.65655	4.26113	3.99085	3.63586	2.98446	2.99796	3.29676	4.06432	3.82094	3.49412	3.69298	3.35388	2.98671	Tumor	BRCA
TCGA-A2-A04P-01A	4.49806	2.55676	2.79246	2.71438	2.16424	4.25128	3.32471	3.27421	2.49771	1.89539	2.87467	3.7153	3.62309	2.50443	4.62042	2.72093	2.7532	Tumor	BRCA
TCGA-BH-A0W3-01A	3.85275	2.79219	2.98251	2.58488	2.96869	3.98031	4.18411	4.10018	4.08545	2.55573	3.76785	4.34217	3.25296	3.86311	3.21415	4.35623	3.40391	Tumor	BRCA
TCGA-BH-A0B5-01A	4.2714	2.66562	2.88174	2.87922	2.50085	3.91861	4.18795	4.36513	3.69697	2.11826	3.63696	4.14051	3.83345	3.65145	3.16741	4.05011	3.06387	Tumor	BRCA
TCGA-S3-AA10-01A	5.16932	2.64968	3.61019	3.21961	2.48149	4.08307	4.33744	4.33257	2.71538	2.68554	2.78976	3.86481	4.07253	3.50431	3.49242	3.53035	3.42478	Tumor	BRCA
TCGA-BH-A0B0-01A	3.75691	2.44197	2.29044	2.59315	2.45572	3.76466	3.65636	3.26488	2.70033	2.60644	2.77638	3.84668	3.12976	3.26826	2.74996	3.64047	3.04433	Tumor	BRCA
TCGA-E2-A574-01A	4.73018	2.44202	2.38906	3.36521	2.12535	4.87626	3.5437	3.80101	1.69863	3.24034	2.12697	3.48122	4.51173	3.35966	3.81969	1.39326	3.58327	Tumor	BRCA
TCGA-AN-A0XN-01A	2.98442	2.46793	2.62511	2.12719	2.76368	3.16755	4.17723	3.64025	2.32356	2.33814	2.77633	4.05793	2.82617	2.87745	2.89784	3.21335	3.15811	Tumor	BRCA
TCGA-AN-A0XW-01A	3.33577	2.29685	2.99287	2.40876	2.85465	3.71375	4.28956	3.61987	2.56645	2.66346	3.07686	4.3127	3.5678	3.35455	3.11426	3.92341	3.20773	Tumor	BRCA
TCGA-BH-A0DK-11A	3.75075	2.59261	2.94525	2.44948	2.69601	3.64114	4.26131	3.43855	3.15931	2.29636	3.06609	4.17964	3.2657	3.22818	3.17425	3.9348	3.05011	Normal	BRCA
TCGA-C8-A1HF-01A	3.70558	2.20764	3.19945	3.13982	2.80811	4.70061	4.07178	4.09938	2.40888	2.22036	3.22507	4.1752	3.17092	3.40274	3.84384	4.10654	3.32125	Tumor	BRCA
TCGA-BH-A0AU-11A	4.69197	2.89359	2.92278	2.94969	2.30493	3.39635	4.67997	4.13559	3.75969	2.69745	3.58648	4.30259	3.79577	3.16929	2.75336	4.04934	3.30215	Normal	BRCA
TCGA-AR-A2LO-01A	4.66569	2.52045	2.96652	3.52672	2.82141	3.67089	4.34458	4.24667	3.14892	2.75375	3.75069	4.20445	3.76156	3.43322	3.15537	3.64196	4.20509	Tumor	BRCA
TCGA-D8-A1XA-01A	4.00175	2.15633	3.10364	2.07458	2.34046	3.01195	4.92353	3.83894	3.84585	2.5728	3.44137	3.64136	3.49337	3.66439	3.33339	3.99584	3.34125	Tumor	BRCA
TCGA-BH-A0BL-01A	4.15552	2.66902	2.76661	2.95125	2.59853	3.94235	5.07392	4.00797	2.70731	2.32258	3.67885	3.99066	3.13544	3.53595	3.16531	4.14442	2.65394	Tumor	BRCA
TCGA-EW-A1J2-01A	3.63031	2.57099	2.9178	2.37807	2.58949	3.50257	4.06206	3.83616	3.07621	2.51454	3.36854	4.13015	3.41953	3.37975	2.98712	3.86135	3.06432	Tumor	BRCA
TCGA-BH-A0AZ-01A	3.14566	2.2187	2.65944	1.77872	2.23836	3.54236	3.98254	3.54551	2.16384	2.33129	2.75865	3.62499	3.00822	2.7091	2.93338	3.70012	3.02692	Tumor	BRCA
TCGA-E9-A227-01A	3.0352	2.46997	2.8739	2.55524	2.71702	3.89961	3.57549	3.56391	2.5986	2.59512	2.93476	4.1477	2.98291	3.5952	3.1315	3.78392	3.08742	Tumor	BRCA
TCGA-A2-A0D2-01A	5.1304	2.44225	2.78151	4.65256	2.5309	4.02078	4.62597	3.71561	1.96623	3.19978	3.23495	3.86432	3.59294	3.86282	4.71208	3.62455	3.57127	Tumor	BRCA
TCGA-D8-A1XM-01A	3.50967	2.85457	3.24818	1.96654	3.36058	3.99716	4.5901	3.89429	3.39767	2.65963	3.29037	4.46703	3.42136	3.76444	3.62297	4.25129	3.26108	Tumor	BRCA
TCGA-D8-A1Y3-01A	5.60484	2.21113	3.04227	3.58005	2.69958	3.88136	3.91819	3.77755	2.35157	3.58085	2.63978	3.671	2.66334	3.74959	4.3108	3.92785	3.54917	Tumor	BRCA
TCGA-C8-A275-01A	4.66069	2.41651	2.7404	2.71234	3.04587	3.65315	4.54181	3.75679	2.91052	2.36808	3.06692	5.01103	4.50533	3.4083	3.01172	3.32015	3.22524	Tumor	BRCA
TCGA-E2-A3DX-01A	3.96838	2.42651	2.87439	2.45259	2.28055	2.97995	3.93895	3.65695	2.93819	2.07869	3.3577	4.14442	3.21916	3.08201	2.35051	3.80754	2.72046	Tumor	BRCA
TCGA-C8-A1HM-01A	3.99336	2.55352	3.07849	2.44935	2.79025	4.03822	4.45248	4.001	3.13038	2.78804	3.6671	4.4958	3.35131	5.21786	3.16174	3.63886	3.83829	Tumor	BRCA
TCGA-E2-A158-01A	5.08662	2.87419	2.98885	2.81937	2.72713	5.57469	5.71557	4.51264	3.21065	2.61713	3.5529	4.59771	3.24293	3.29121	3.16027	3.53973	3.50871	Tumor	BRCA
TCGA-AR-A0TP-01A	5.04107	2.60473	3.14659	2.59552	2.61286	3.70055	4.97261	4.11057	2.88605	2.30461	3.3254	4.50338	2.55233	3.09255	2.68402	3.29612	2.95338	Tumor	BRCA
TCGA-A7-A26F-01B	4.30363	3.14726	2.98218	3.76926	2.5755	3.55573	3.71993	3.59057	3.80738	2.24745	3.24744	3.9801	3.42338	2.97775	2.99481	3.29731	2.72416	Tumor	BRCA
TCGA-A2-A1FW-01A	4.57744	2.72707	2.7869	1.98212	3.16111	3.45177	4.62786	4.44193	4.32047	1.91192	3.68953	4.7965	2.08859	3.43276	4.19679	3.35597	3.75494	Tumor	BRCA
TCGA-E2-A15A-06A	4.83686	2.71981	3.48654	2.90935	2.21431	4.0816	4.99314	4.11492	2.98911	1.9259	3.31124	3.59373	3.01519	3.86015	3.35708	3.79817	4.20035	Tumor	BRCA
TCGA-BH-A0C7-01B	3.59463	2.63412	2.61546	2.82846	3.17344	4.34216	4.93415	4.03265	3.27408	2.6134	3.3301	3.52206	3.44625	3.37848	3.83494	4.12892	3.28869	Tumor	BRCA
TCGA-AR-A1AJ-01A	4.19182	2.78667	3.13689	3.22047	2.87757	4.45186	4.56455	3.96321	2.94676	2.80648	3.80999	4.17213	2.99372	3.46914	3.38572	4.34089	3.31777	Tumor	BRCA
TCGA-E9-A1R5-01A	3.69157	2.47574	2.82445	2.51863	3.04099	3.96265	3.56576	3.76195	3.61778	2.82345	3.39364	4.24588	3.08052	3.57241	3.4196	4.19835	3.6233	Tumor	BRCA
TCGA-A8-A09A-01A	3.92395	2.61954	3.10205	2.19924	2.60419	4.10275	4.5524	3.74299	3.50962	2.63508	3.14598	4.19219	3.85903	3.15655	3.35396	3.81359	3.51364	Tumor	BRCA
TCGA-GM-A2DC-01A	5.33752	2.4485	2.83156	2.9607	2.20401	3.98185	4.42449	3.75837	2.77233	2.21297	3.47712	3.6596	3.80716	3.55977	3.72872	3.80947	3.46813	Tumor	BRCA
TCGA-A2-A3KC-01A	4.48424	2.57163	2.92348	2.82337	2.68704	3.55464	4.02576	3.85891	3.10812	1.72357	2.97909	4.25056	3.59337	3.13164	2.74478	3.72422	3.39938	Tumor	BRCA
TCGA-AO-A0J9-01A	2.69755	2.11449	2.57234	2.26686	1.95129	3.53073	3.60112	3.24164	2.30727	1.78778	2.91608	3.55558	2.95857	2.60614	2.41	3.37239	2.88455	Tumor	BRCA
TCGA-E2-A14Y-01A	4.51155	2.28948	2.82869	2.27456	3.51185	4.00554	3.536	4.25915	2.0879	2.15295	3.07473	4.45817	3.19637	3.18685	3.49559	3.25022	3.03168	Tumor	BRCA
TCGA-D8-A4Z1-01A	4.36172	2.85723	2.78682	3.05625	2.4455	3.38478	4.20391	3.95677	3.47813	2.55576	3.32332	3.85042	3.81324	3.30549	3.06076	3.81707	3.13888	Tumor	BRCA
TCGA-3C-AALI-01A	4.17772	2.80498	2.48932	3.33156	2.66173	4.15375	3.68798	3.5748	3.26942	2.3997	2.99299	4.05343	4.37852	2.86326	3.77986	3.05542	3.86144	Tumor	BRCA
TCGA-E2-A159-01A	4.21283	2.54621	2.67438	3.27398	2.56994	4.67778	4.33934	3.78468	2.76728	2.67038	3.2364	4.43272	2.73309	3.95187	3.09913	3.56596	3.41458	Tumor	BRCA
TCGA-E2-A155-01A	3.50749	2.67266	3.01933	1.9395	2.45554	3.70223	3.9002	3.99907	3.0943	1.97949	3.34301	4.05815	3.20741	4.09518	3.71849	4.21226	2.88974	Tumor	BRCA
TCGA-A8-A082-01A	4.45575	2.57095	3.31458	2.51508	2.9241	4.16093	4.48299	3.53888	2.72349	1.63727	3.14526	4.10935	3.85548	3.48441	3.53072	3.91052	3.04615	Tumor	BRCA
TCGA-E2-A14R-01A	5.0919	2.38846	2.83294	3.34646	2.45146	4.0672	4.95165	3.71795	3.46418	1.69433	2.90065	3.67024	3.04708	2.80783	3.09218	3.42671	3.82129	Tumor	BRCA
TCGA-D8-A141-01A	4.41147	2.52551	2.72383	2.42503	2.86697	3.57456	3.69995	3.68374	2.93199	2.37075	3.27107	4.32831	3.13952	3.11177	3.08519	3.7659	2.90019	Tumor	BRCA
TCGA-BH-A204-01A	2.84479	2.36443	3.01044	2.02095	2.92043	4.17444	4.52447	4.19499	3.02478	1.85121	3.47128	4.48063	2.22018	3.08685	3.66333	4.2598	2.89653	Tumor	BRCA
TCGA-E2-A109-01A	3.54108	2.73768	3.17521	3.02802	3.42	4.01928	4.24211	3.87499	3.10186	2.08073	3.86923	4.44649	3.58614	4.33267	3.53868	3.47089	3.82473	Tumor	BRCA
TCGA-C8-A1HJ-01A	2.19203	2.86612	2.41371	2.27538	3.65199	4.30476	5.41214	4.23096	2.89615	3.0704	3.92849	5.30549	2.73111	3.82511	3.68513	3.67594	4.3509	Tumor	BRCA
TCGA-BH-A0C1-01B	4.10805	2.5536	2.69453	2.50461	2.75415	4.08549	4.09107	4.26396	2.99876	2.34989	2.86815	4.24239	3.37812	3.92885	3.15964	3.84528	3.36785	Tumor	BRCA
TCGA-E9-A1RI-11A	2.29555	2.27626	2.08359	2.38537	2.58778	3.55994	4.24824	3.23306	2.70018	2.12065	2.6856	3.8539	2.13414	1.9043	2.41422	3.47847	2.51437	Normal	BRCA
TCGA-D8-A1Y2-01A	4.14307	2.39149	2.7542	2.29619	2.71515	3.92021	4.08632	3.30598	2.26511	2.71099	2.99108	3.84845	3.37304	3.14509	2.86908	3.46463	3.02467	Tumor	BRCA
TCGA-E2-A1LH-11A	4.06526	2.75504	2.85382	2.9584	2.42134	3.447	4.71434	3.77962	3.39936	2.65818	3.32207	4.21898	3.50553	3.0931	2.7939	4.0056	3.3121	Normal	BRCA
TCGA-AR-A2LJ-01A	4.10501	2.53005	2.40616	3.16857	2.09233	3.43073	2.88664	2.98319	1.78787	2.16028	2.19228	3.29418	3.79948	2.77907	2.80313	3.37703	2.93326	Tumor	BRCA
TCGA-AC-A2QH-01B	4.39042	2.94876	3.44715	2.82964	2.68193	4.37485	4.23401	4.46744	3.17012	1.56516	4.41772	4.03137	3.58191	3.51946	2.90249	3.60004	2.79578	Tumor	BRCA
TCGA-A2-A0YK-01A	3.86897	2.67024	2.76129	2.56975	2.78885	3.43526	4.34108	3.82915	3.19871	2.30055	3.43753	4.39842	3.34753	2.94875	2.91441	3.93999	3.17552	Tumor	BRCA
TCGA-E9-A22H-01A	3.09996	2.66996	3.26107	2.26278	3.25247	4.41313	4.17203	4.16673	3.2428	2.84402	3.7745	4.60465	3.02641	3.74979	3.78956	4.14303	3.53471	Tumor	BRCA
TCGA-E2-A1L8-01A	2.23664	2.21169	2.71481	1.99995	2.85585	4.17624	4.37733	4.33893	3.33711	1.92013	3.68186	4.44029	2.61279	3.14601	3.30811	3.69847	3.25499	Tumor	BRCA
TCGA-BH-A0B8-01A	3.63184	2.44617	2.71676	2.07059	2.94893	3.87385	4.14221	3.60751	3.30433	2.59747	3.13025	4.69554	3.45337	4.04531	3.2858	4.26568	3.10155	Tumor	BRCA
TCGA-BH-A18G-01A	3.17756	2.22152	2.5941	2.34894	1.97802	3.65338	3.44711	3.34687	2.11849	2.44531	2.67287	3.97152	2.64768	2.7838	2.83985	3.19501	2.65799	Tumor	BRCA
TCGA-JL-A3YX-01A	4.6673	2.11889	2.70788	3.23404	2.05453	3.89696	3.41402	3.99474	2.96011	2.86779	3.26692	3.4965	4.04253	3.52407	3.25484	3.40367	2.74579	Tumor	BRCA
TCGA-S3-AA17-01A	4.51569	2.31739	2.99669	2.79902	2.41366	3.37875	4.31059	3.71424	2.56116	2.51349	2.79178	4.2754	3.89651	3.32931	3.1923	4.18572	3.73078	Tumor	BRCA
TCGA-BH-A0B5-11A	2.30715	2.23974	2.24034	2.58419	2.19146	3.39794	3.52668	2.68735	2.50469	1.83208	2.64361	3.61231	2.363	2.07972	2.46341	3.2711	2.17795	Normal	BRCA
TCGA-E2-A15M-01A	3.50938	2.41614	3.354	2.03082	2.88194	3.75154	5.38115	3.75603	3.28391	2.79103	3.83219	4.41368	3.33117	3.37462	3.46132	3.62927	3.69636	Tumor	BRCA
TCGA-E2-A56Z-01A	3.59092	2.42533	3.02178	2.91883	2.14061	3.35559	3.97397	4.15741	2.96437	2.30216	3.29662	3.55855	3.45887	3.79055	3.20339	3.1821	3.38297	Tumor	BRCA
TCGA-A7-A0CH-01A	3.30004	2.71988	2.85047	2.35681	2.98392	3.90272	4.00995	3.84388	3.0609	2.6061	3.49628	4.21727	3.14123	3.54171	3.29924	4.131	3.34144	Tumor	BRCA
TCGA-AR-A0TZ-01A	4.42533	2.88262	3.47515	2.67339	2.88637	2.9898	4.51046	4.54366	2.99382	1.62576	3.80164	4.40981	3.34153	4.0441	3.73841	4.54481	3.92612	Tumor	BRCA
TCGA-E2-A15I-01A	3.86272	2.68251	2.96416	2.96025	3.23075	3.68905	4.20458	4.22668	4.14428	2.32454	4.18852	4.89027	3.16406	3.44084	3.28842	4.02454	3.1762	Tumor	BRCA
TCGA-BH-A0B4-01A	4.66353	2.35311	2.76963	1.91887	2.38802	3.78563	4.2519	3.5084	2.63492	2.53671	2.61313	3.67126	3.31657	3.23854	3.02706	3.46782	3.56709	Tumor	BRCA
TCGA-E2-A15K-06A	4.20002	2.87028	3.08222	2.58403	3.06812	3.91724	4.02164	3.79867	2.75776	1.90958	4.10094	4.35793	3.75213	3.9495	3.1617	4.01652	3.22281	Tumor	BRCA
TCGA-BH-A0WA-01A	3.40429	2.76186	2.65745	2.77107	2.97809	4.25404	4.7898	4.09273	2.39822	2.78874	3.77971	3.99716	3.13645	3.77365	3.35727	3.45288	3.2328	Tumor	BRCA
TCGA-A2-A0ET-01A	3.64738	2.52845	3.69801	2.50078	3.11851	3.6546	5.33595	4.50549	3.59781	2.05516	3.74904	4.74742	4.11345	3.5735	3.55246	4.15965	3.91072	Tumor	BRCA
TCGA-OL-A5RW-01A	5.04311	2.8104	2.32118	4.89319	2.16697	3.76094	3.07966	3.51647	1.59699	2.98947	2.15435	4.03091	3.65516	3.29945	3.5067	2.73052	3.27949	Tumor	BRCA
TCGA-A7-A13D-01B	3.37374	3.61791	2.61441	3.07878	2.78444	3.88737	4.70419	4.82463	3.74491	1.60581	4.02556	4.56983	4.64667	3.04014	3.20563	3.17124	3.3512	Tumor	BRCA
TCGA-AN-A0FD-01A	3.66538	2.3323	2.71389	2.47466	2.50802	3.87364	4.51678	3.80222	2.43853	2.6336	2.59602	3.88643	3.37501	2.97028	2.64892	3.58082	3.60971	Tumor	BRCA
TCGA-BH-A0H7-01A	4.50452	2.0723	2.56861	2.51951	2.50644	3.25227	4.34024	3.7022	2.33679	2.64137	2.70955	3.83378	3.00822	3.27138	2.85418	3.50277	4.27955	Tumor	BRCA
TCGA-LL-A5YL-01A	4.32514	2.42027	2.6382	3.53041	2.42236	3.77155	3.18995	3.56074	1.99861	2.80651	2.5842	3.42624	3.98158	3.01785	3.16475	3.04584	3.56679	Tumor	BRCA
TCGA-A2-A0D0-01A	4.22859	4.52397	2.71817	3.2594	3.2128	4.83261	4.38757	3.77298	1.84828	2.45209	2.97747	4.67894	3.38953	2.97936	3.51855	2.65176	3.5728	Tumor	BRCA
TCGA-AO-A129-01A	4.70247	2.66551	3.28699	2.93735	2.1172	3.99118	4.23356	3.75194	2.60714	2.34528	3.38846	3.6119	3.30998	3.36004	3.51255	3.60152	3.41693	Tumor	BRCA
TCGA-BH-A1EW-01A	3.73739	2.42382	3.26769	2.52261	2.92954	3.76675	4.41853	5.17816	3.07233	2.58314	3.64479	4.12287	3.14814	3.35144	3.25966	4.12907	3.39928	Tumor	BRCA
TCGA-AO-A03M-01B	3.93696	2.51474	2.95189	2.01555	2.78147	3.89754	4.55971	3.68789	2.82545	2.47807	3.09983	4.74295	3.57028	2.96915	3.37087	3.38277	3.51072	Tumor	BRCA
TCGA-B6-A0RP-01A	3.93281	2.53722	2.86901	2.45977	2.99592	3.79243	4.02551	3.62562	3.53015	2.80029	3.40612	3.99909	3.51493	3.28596	3.07978	4.15712	3.30328	Tumor	BRCA
TCGA-E2-A15T-01A	4.32738	2.76147	3.15455	2.44611	3.14319	3.82238	4.7913	3.85703	2.90916	1.78356	3.09382	4.61624	3.78254	3.53847	2.90894	3.98866	3.16668	Tumor	BRCA
TCGA-A2-A4RW-01A	5.46818	2.91519	2.44212	3.02504	2.7465	3.44047	3.61351	4.02487	2.86702	2.82795	3.28687	4.24505	4.06478	3.53423	3.31189	4.0682	3.30737	Tumor	BRCA
TCGA-AC-A2FF-11A	3.57596	2.5517	2.84056	2.85145	2.57909	3.62629	4.60721	3.98035	3.16299	2.7451	3.1961	4.05336	3.31474	3.15663	3.06759	3.95874	3.24967	Normal	BRCA
TCGA-BH-A0B7-11A	4.31223	2.92338	3.03394	2.71973	2.65075	3.57311	4.8174	4.33032	3.77575	2.34268	3.72194	4.48668	3.52144	2.96139	3.19639	3.87747	3.16039	Normal	BRCA
TCGA-A8-A08O-01A	4.19671	2.34108	3.00783	2.72787	3.09684	3.6968	4.1939	4.14431	3.24827	2.94012	3.42332	4.11123	4.00911	3.58833	3.37991	4.2628	3.4289	Tumor	BRCA
TCGA-BH-A18I-01A	4.54182	2.32712	2.82939	2.55933	2.82585	3.45762	4.24004	4.08877	3.69404	2.53981	3.57061	4.31038	2.95931	3.18103	2.90059	3.82978	3.08755	Tumor	BRCA
TCGA-BH-A0BM-01A	3.12365	2.42361	2.51572	2.56283	2.29488	3.32568	4.2467	3.4988	3.06269	2.29415	2.93722	3.99911	2.67719	2.63744	2.86793	4.02144	3.06424	Tumor	BRCA
TCGA-E2-A14N-01A	3.28556	2.27295	2.945	3.11615	2.41036	4.90949	4.46548	4.05615	2.94854	3.14427	3.11514	3.64634	2.634	3.18083	4.33778	2.40291	3.8467	Tumor	BRCA
TCGA-5L-AAT0-01A	4.25462	2.73501	2.60601	2.9779	2.11987	3.56195	3.67329	3.52569	3.29175	2.82981	3.1081	3.87237	3.50775	3.23543	2.97774	3.93137	3.21774	Tumor	BRCA
TCGA-E9-A1NG-11A	3.14115	2.4036	2.53075	2.43853	2.46156	3.29963	4.16212	3.12655	3.08467	2.16009	2.78457	3.84934	2.6359	2.53098	2.48402	3.75685	2.56554	Normal	BRCA
TCGA-BH-A6R9-01A	3.59485	2.07233	2.77678	2.59743	2.35229	2.92385	3.71585	3.48288	2.40799	2.43743	2.63216	3.7521	3.18838	2.89573	2.61777	3.44481	2.75198	Tumor	BRCA
TCGA-EW-A1PG-01A	2.93672	2.42934	2.92967	2.44738	2.92655	3.59177	4.63245	3.86212	2.86147	2.46589	3.04503	4.62984	2.84906	3.14358	3.16759	3.65792	2.96455	Tumor	BRCA
TCGA-AN-A03Y-01A	5.71214	2.20042	2.90225	3.10916	2.38093	3.18953	3.70225	3.74332	2.92013	2.30974	3.10019	4.3823	3.61894	3.44312	3.46093	3.52462	3.42918	Tumor	BRCA
TCGA-BH-A0DL-11A	3.8032	2.65037	2.75021	2.78537	2.54216	3.43572	4.654	3.9273	3.29037	2.53867	3.3389	4.16987	3.19421	2.9367	2.79009	3.90493	2.963	Normal	BRCA
TCGA-B6-A0RT-01A	4.97022	2.83094	3.2871	3.04322	3.0396	3.52606	4.47091	3.95023	3.44544	2.88317	3.96857	4.76309	3.66254	3.42565	2.97361	4.03499	3.6033	Tumor	BRCA
TCGA-A2-A25D-01A	4.24243	2.19477	2.52193	2.65033	2.55838	3.45917	4.18586	3.47931	2.05028	2.31681	2.44277	3.88	3.33659	2.95731	2.96171	2.76199	2.80281	Tumor	BRCA
TCGA-A7-A56D-01A	4.28261	2.16613	1.46324	3.07169	2.18454	3.76772	3.00802	2.50655	1.50639	2.06448	1.79529	3.30247	4.21363	2.42135	2.06739	2.18506	3.2026	Tumor	BRCA
TCGA-D8-A73W-01A	4.13983	2.54412	2.84137	2.7458	2.58544	3.31487	3.81084	3.5859	3.50053	2.36862	2.91276	3.80216	3.60972	3.00639	3.02119	3.88959	2.96585	Tumor	BRCA
TCGA-AO-A0J5-01A	3.72836	2.58308	2.6756	2.23969	2.68472	3.19251	4.2299	3.62531	2.5428	2.08228	3.12511	4.10819	3.55849	3.16427	2.67533	3.70759	3.12288	Tumor	BRCA
TCGA-E9-A1R7-11A	2.956	2.48456	2.36467	2.37317	2.36962	3.38308	4.31321	3.19175	3.09725	2.27678	2.97973	3.89523	2.48715	2.5289	2.5125	3.57287	2.44594	Normal	BRCA
TCGA-A2-A1G6-01A	3.31135	2.68323	2.63329	2.68515	2.69964	3.63659	5.07648	3.96168	3.57739	2.57949	3.389	4.51928	3.34336	2.63575	2.93924	3.79185	3.39241	Tumor	BRCA
TCGA-AC-A3OD-01B	2.78685	3.02381	3.99585	2.36373	2.74991	3.57269	3.48405	4.03888	4.65387	2.01823	4.33603	4.13716	3.22865	2.95608	3.23271	3.80418	2.98805	Tumor	BRCA
TCGA-BH-A0H9-11A	3.03547	2.38864	1.93437	3.2812	1.81918	3.18132	3.55384	2.6619	2.04811	2.39999	1.93884	3.04846	2.80605	2.02985	2.0221	3.38658	2.5093	Normal	BRCA
TCGA-A7-A0CJ-01A	4.86963	2.76043	3.03426	3.04563	3.24527	4.27293	4.18332	3.66402	2.66248	3.14018	3.33925	4.6403	3.68222	3.01539	4.04009	2.35342	3.83306	Tumor	BRCA
TCGA-A8-A07U-01A	4.75021	2.72287	2.77209	2.87329	2.64873	4.07171	4.15207	4.02048	2.59513	2.87117	3.30107	4.07057	3.55937	3.44714	3.01829	3.17153	3.19993	Tumor	BRCA
TCGA-D8-A1XS-01A	4.41978	2.50334	2.96588	2.45256	3.09711	3.89605	4.21124	3.92312	3.08106	2.45459	3.72805	4.76051	3.02335	3.48157	3.41552	3.89875	4.42331	Tumor	BRCA
TCGA-B6-A0I8-01A	4.8701	2.28922	2.78609	2.64563	1.69615	3.25698	4.58789	4.05671	3.13176	3.32163	3.40755	3.31679	3.39407	4.01208	2.47016	3.79646	3.93769	Tumor	BRCA
TCGA-LL-A5YM-01A	3.75204	2.45339	2.0782	3.42071	2.58731	4.00981	3.77454	3.02471	1.74299	1.97692	1.94368	2.96693	4.65497	2.97498	2.36745	2.6456	3.37514	Tumor	BRCA
TCGA-E2-A15E-01A	4.64746	2.49769	2.86395	2.72087	2.74758	3.77717	4.39496	3.90507	3.3037	2.51015	3.36168	4.18747	4.0964	3.48662	3.22916	4.16577	3.32895	Tumor	BRCA
TCGA-D8-A27G-01A	3.6649	2.53643	2.75577	2.35056	3.0737	3.49416	3.68667	3.51857	2.47087	1.89716	2.75552	4.70435	3.2972	3.09861	3.11355	3.47317	3.13476	Tumor	BRCA
TCGA-BH-A1EX-01A	3.26874	2.4013	2.8562	2.64153	2.89059	3.7639	5.35775	3.79078	2.70479	2.34293	3.76449	4.23973	2.80173	3.76729	2.99648	3.7307	3.12898	Tumor	BRCA
TCGA-A8-A076-01A	4.9001	2.76837	2.74874	2.16739	3.23742	3.964	4.32707	3.91049	3.44739	2.70158	3.3001	4.66517	3.65487	2.9516	3.99721	3.65735	3.84699	Tumor	BRCA
TCGA-EW-A1OV-01A	4.29829	2.84862	2.88085	2.9581	2.74153	3.87255	3.99191	3.88027	2.99484	2.8901	3.29797	4.37843	3.32062	3.85179	3.06388	4.5798	3.41284	Tumor	BRCA
TCGA-B6-A0X7-01A	4.53122	2.60685	2.8462	2.8065	2.69298	3.72728	4.02384	3.81942	2.69266	2.43134	3.40344	4.32039	3.22323	3.0169	3.167	4.0823	3.12485	Tumor	BRCA
TCGA-B6-A0WT-01A	3.84082	2.77866	3.06645	2.44764	3.34408	4.08496	5.29925	4.05591	2.79225	2.58721	3.76795	4.38142	3.43337	4.3163	3.30139	4.03612	3.35842	Tumor	BRCA
TCGA-A2-A4S3-01A	4.13017	2.5919	3.21096	3.41116	2.3398	3.99254	3.8671	4.00044	2.59297	2.87716	2.97089	3.91235	4.14946	4.22854	3.00446	3.91942	3.19912	Tumor	BRCA
TCGA-BH-A0BZ-01A	4.64031	2.31338	2.52957	2.70886	2.46781	3.70955	3.76824	3.83412	2.37551	2.82708	3.07528	3.91376	3.17993	3.07522	2.73088	3.88221	4.12919	Tumor	BRCA
TCGA-OL-A5RU-01A	4.55293	2.80954	2.98098	2.97916	2.53378	3.60132	4.27383	3.64909	2.90674	2.38505	3.01648	3.95512	4.05657	3.27116	3.27781	3.83642	3.12401	Tumor	BRCA
TCGA-D8-A73U-01A	4.40995	2.80583	2.31344	2.98183	2.50317	3.27081	3.56318	3.52104	3.36308	2.63844	2.91392	3.81225	3.59106	2.97116	2.75502	3.72481	2.9934	Tumor	BRCA
TCGA-A2-A0YT-01A	4.92346	2.40251	3.2134	2.10468	3.00665	3.80455	5.14198	3.9818	2.68639	2.86631	3.60327	4.77628	3.66672	3.23606	3.54803	3.63122	3.73859	Tumor	BRCA
TCGA-A1-A0SK-01A	5.71509	3.0743	3.72315	3.02497	2.72654	4.74067	5.59386	4.74798	2.90133	2.91317	2.88893	4.65791	3.00991	4.12677	3.72717	3.66031	3.61783	Tumor	BRCA
TCGA-E9-A295-01A	4.28366	2.24716	2.66765	2.5537	2.7262	3.52089	3.81133	3.71448	2.92201	2.17097	2.84032	4.22832	3.20687	4.16593	3.14124	3.50423	3.60194	Tumor	BRCA
TCGA-AR-A1AR-01A	3.86407	2.82748	3.29632	2.83376	3.5944	4.67658	4.6057	4.12649	3.18534	3.1871	3.39011	5.19928	2.92999	2.995	3.94985	3.63474	2.85223	Tumor	BRCA
TCGA-D8-A1XY-01A	3.62844	2.44177	2.77349	2.22534	3.22183	3.80646	4.09735	3.82735	3.38286	2.60356	3.51665	4.0883	3.17332	3.42274	3.29656	4.27008	3.54622	Tumor	BRCA
TCGA-LL-A8F5-01A	4.87228	2.197	2.6933	4.67333	2.63637	3.92519	3.53521	3.38811	1.72792	2.5221	2.76722	4.1557	4.04105	3.9055	3.62158	2.85503	3.0811	Tumor	BRCA
TCGA-E9-A1R6-01A	4.30689	2.3644	2.89436	2.3775	2.2662	3.57484	4.04961	3.70504	3.33674	2.67063	3.22708	3.63069	3.95827	3.54523	3.17683	3.94464	3.54422	Tumor	BRCA
TCGA-BH-A1FL-01A	4.73687	2.85242	3.19087	2.88712	2.82233	3.95536	4.15372	4.15056	4.19828	3.07925	3.79103	4.23455	3.72514	3.74913	3.31773	4.15401	3.58115	Tumor	BRCA
TCGA-BH-A18S-11A	3.93194	2.67982	2.6855	2.7532	2.40738	3.37723	4.28373	3.65592	3.31924	2.24127	3.1925	3.9765	3.15325	2.67923	2.90031	3.757	2.70209	Normal	BRCA
TCGA-E9-A1RE-01A	5.2278	2.12091	3.86181	2.36065	3.56892	3.7421	3.38142	4.17777	3.32924	2.61019	3.16821	5.02921	3.38322	3.75825	3.99415	3.76463	3.55191	Tumor	BRCA
TCGA-BH-A0BC-11A	3.50895	2.50323	2.70427	2.64818	2.21749	3.43231	4.3713	3.42497	3.11849	2.89665	3.16053	3.98543	2.98909	2.92171	2.83724	3.79238	2.94052	Normal	BRCA
TCGA-D8-A1JN-01A	4.48595	2.03021	2.66531	2.7914	2.90956	3.83985	3.62893	4.0812	3.10043	2.82284	3.3363	4.71213	3.63619	2.69634	2.98233	3.48396	3.37782	Tumor	BRCA
TCGA-D8-A145-01A	4.03264	2.74828	2.97147	2.66371	2.88862	2.87601	4.37097	3.78262	3.37351	2.52211	3.39316	4.30948	3.73929	3.52365	3.22436	4.08545	3.6857	Tumor	BRCA
TCGA-B6-A0IK-01A	2.89855	2.87231	2.2845	2.4745	2.80003	4.43546	4.69247	3.83597	2.5676	2.27337	3.42585	4.87656	3.36394	3.50858	2.90496	3.4858	3.29356	Tumor	BRCA
TCGA-C8-A1HE-01A	3.33965	2.67685	3.13093	2.33792	3.09097	3.76924	4.00985	3.82065	3.28009	2.76177	3.33488	4.4364	3.33145	3.66989	3.18525	4.01124	3.45118	Tumor	BRCA
TCGA-A8-A0AB-01A	3.86217	2.69904	3.45434	2.76703	1.80668	3.76756	4.40589	4.50633	3.27804	2.15308	4.01826	4.44918	3.5851	3.84232	3.06421	4.08863	3.41146	Tumor	BRCA
TCGA-EW-A1J3-01A	2.74872	2.48222	2.80479	2.03056	2.73678	3.94649	3.85616	3.97176	2.86233	1.46174	4.02765	4.67756	2.57102	2.74243	4.00725	3.6429	3.58344	Tumor	BRCA
TCGA-GI-A2C8-01A	3.36516	2.38266	2.19644	2.39806	2.83552	2.87994	3.83926	3.27107	2.95888	2.69469	3.03159	4.36152	3.02164	2.96044	3.69894	2.87055	3.11003	Tumor	BRCA
TCGA-A2-A0YJ-01A	4.50419	3.13103	2.70936	2.59203	3.13285	4.5958	4.75171	3.78506	2.4557	3.0868	3.14013	4.15264	2.55009	3.65888	2.89074	2.68275	3.63424	Tumor	BRCA
TCGA-A8-A0A7-01A	3.56743	2.45317	2.77635	2.62298	2.5926	3.56551	4.18743	4.17036	2.81268	3.01234	2.7492	3.79225	2.98445	3.35702	2.94237	3.62755	3.47101	Tumor	BRCA
TCGA-A8-A08L-01A	4.8587	2.90534	2.37088	2.87617	2.31538	4.96641	4.2041	4.28085	2.20428	2.72946	3.66618	4.61069	3.25546	3.96141	2.9767	3.48924	3.98346	Tumor	BRCA
TCGA-BH-A0H6-01A	5.36494	2.35409	2.74986	2.32072	2.69074	3.66717	3.84514	3.86575	2.95274	2.85055	3.75453	3.94924	3.46009	3.89125	3.11677	3.5264	2.96348	Tumor	BRCA
TCGA-D8-A1XL-01A	4.51634	2.74634	2.94497	3.43629	2.30597	4.25634	3.70027	4.03159	2.82382	3.29171	2.89183	3.55753	3.60594	3.76689	3.99825	3.94889	3.71272	Tumor	BRCA
TCGA-E2-A10B-01A	3.28908	2.4408	3.01942	2.44016	2.62337	3.89104	4.44917	3.93058	3.6121	2.51937	3.60359	4.48094	3.79665	3.60046	3.14127	3.4029	3.8088	Tumor	BRCA
TCGA-E9-A228-01A	3.60672	2.08026	3.20251	2.53444	2.92621	4.13337	4.90493	3.81106	3.21324	3.22157	3.11364	4.56376	3.41334	3.48224	3.44316	4.13634	3.18402	Tumor	BRCA
TCGA-A2-A3KD-01A	4.22367	2.36152	2.87422	2.48914	3.14138	3.30564	3.71708	3.72071	2.83092	2.7104	3.1744	4.63162	3.40646	3.17172	3.10827	3.65969	3.07027	Tumor	BRCA
TCGA-AQ-A7U7-01A	4.493	2.74814	2.71812	3.03074	2.77571	3.49572	4.24062	3.83032	3.56713	2.41437	3.27268	3.83275	3.93739	3.14414	2.95866	3.60514	3.39667	Tumor	BRCA
TCGA-AO-A1KS-01A	4.25554	2.09154	2.87721	2.1149	3.32252	3.86629	4.99006	4.82615	3.45323	2.63792	3.83881	5.58045	2.52985	2.86598	4.10528	4.04788	3.61029	Tumor	BRCA
TCGA-A7-A0DC-01B	4.8674	3.22798	3.40575	2.95245	2.70292	3.31194	3.66731	3.79417	3.86542	1.94864	4.53904	4.59231	3.94147	2.67029	3.27195	3.28146	3.48143	Tumor	BRCA
TCGA-BH-A0EB-01A	3.0478	2.42183	2.69021	2.05418	2.8066	3.69685	3.94308	3.75542	2.89953	2.82893	2.98224	4.16972	2.8696	3.56141	2.71939	3.65895	3.33111	Tumor	BRCA
TCGA-E2-A1LB-11A	4.1528	2.70882	2.84855	2.8323	2.51949	3.54314	4.56739	3.93512	3.42506	2.65589	3.2815	4.24563	3.52761	3.23811	2.91703	3.92495	3.28408	Normal	BRCA
TCGA-C8-A12W-01A	4.73003	2.38334	2.89132	2.41039	2.77044	3.63531	5.00945	3.54017	2.69177	2.22283	3.11853	3.74955	3.79435	3.92175	3.10168	3.61244	4.29106	Tumor	BRCA
TCGA-AR-A24L-01A	2.84776	2.34716	3.01041	1.96479	2.73357	3.8413	4.11244	3.86376	2.48861	2.50217	3.76441	3.99876	2.42404	3.41976	3.35898	3.4893	3.67647	Tumor	BRCA
TCGA-EW-A1PB-01A	4.98638	2.86692	2.91365	3.11533	2.45457	4.5513	3.45298	3.3769	2.36005	3.36144	2.27628	3.57931	3.89121	3.48138	3.5722	2.73085	3.39653	Tumor	BRCA
TCGA-D8-A1JJ-01A	2.85794	2.82762	2.85635	2.25289	3.08155	3.93659	4.52585	4.07231	3.35633	2.78153	3.84398	4.55874	2.922	3.01612	3.10062	4.06729	3.28635	Tumor	BRCA
TCGA-C8-A12Z-01A	3.02235	2.64407	2.77308	2.43596	3.01301	3.90486	3.57871	4.1112	2.82254	2.78045	3.34413	4.63424	2.89889	3.27403	3.69226	3.97357	3.56793	Tumor	BRCA
TCGA-A8-A09X-01A	3.67327	2.63418	2.74375	3.04671	2.80269	3.19707	3.74116	3.78464	2.99054	2.6698	3.64097	4.17384	3.44543	3.21402	3.1855	4.28069	2.93058	Tumor	BRCA
TCGA-AC-A62Y-01A	3.99033	2.73899	2.41209	2.54921	2.6575	4.26655	4.61973	3.39455	3.31592	2.71781	3.33093	4.2329	3.4793	3.45255	3.36769	3.11559	3.5609	Tumor	BRCA
TCGA-AC-A3YJ-01A	4.37269	2.66069	2.6996	2.98912	2.15173	3.57111	3.77867	3.61432	2.4875	2.16144	2.83701	3.61481	3.134	3.8409	3.0775	2.99314	3.14277	Tumor	BRCA
TCGA-E9-A22G-01A	3.81268	2.38779	4.09769	3.27002	2.32464	5.64627	4.25261	4.46424	2.43263	3.5191	3.13904	4.00917	2.56235	3.76627	4.49799	3.15378	3.11798	Tumor	BRCA
TCGA-GM-A5PX-01A	3.89977	2.65236	2.72366	2.94863	1.9253	3.59354	3.61233	3.71832	2.80155	2.89887	3.28876	3.24003	3.23055	3.02161	3.19324	3.71298	3.30105	Tumor	BRCA
TCGA-A2-A4RX-01A	4.48495	2.60766	2.15727	2.22863	3.01517	3.25068	4.43715	3.41958	2.96095	2.75324	3.38991	3.94047	3.67717	3.42595	3.14451	3.40197	3.30489	Tumor	BRCA
TCGA-BH-A0HK-11A	3.57741	2.53403	2.81791	2.51434	2.15183	3.34428	4.38086	3.25107	2.88651	2.45266	3.16673	3.90654	3.17955	2.80426	2.31539	3.84033	2.95982	Normal	BRCA
TCGA-B6-A0WW-01A	4.28649	2.58874	3.00185	2.42978	2.83071	3.97828	3.69461	3.89329	2.68895	2.53813	3.00665	4.27826	3.22561	3.56001	3.02136	4.00431	3.28926	Tumor	BRCA
TCGA-A2-A0SV-01A	4.79226	2.18515	2.78507	2.70359	2.39799	3.94172	4.54637	3.54406	2.55688	2.2998	2.62411	3.50941	3.51453	3.27707	3.60216	2.83414	3.01968	Tumor	BRCA
TCGA-AR-A24U-01A	3.96816	2.4456	2.96557	2.20085	3.34425	3.59662	3.83515	3.86642	2.86716	2.24815	3.30019	4.19236	3.31925	2.8153	3.35024	3.35217	3.17664	Tumor	BRCA
TCGA-B6-A0X0-01A	4.23295	2.53987	2.83944	3.23824	2.61978	4.145	3.36813	3.857	3.00019	3.36006	3.26037	4.02109	3.43919	3.4839	3.55294	3.70011	3.32138	Tumor	BRCA
TCGA-BH-A0EA-01A	3.77612	2.6778	2.6579	2.72247	2.59766	3.56467	3.74956	3.43423	3.05648	2.37666	3.50451	4.07125	3.17195	3.78062	2.91445	3.94621	3.06589	Tumor	BRCA
TCGA-LL-A440-01A	4.73652	2.32535	2.56219	2.89853	2.23685	2.86321	3.8229	3.67905	2.95061	2.29883	3.19618	3.56292	3.31955	2.87707	2.74333	3.4777	2.72818	Tumor	BRCA
TCGA-A1-A0SQ-01A	3.37806	2.49426	3.04035	2.51694	2.74216	3.61099	4.26464	3.41504	2.42724	2.91583	2.6446	4.06437	4.80515	3.61293	3.06735	3.98645	4.45021	Tumor	BRCA
TCGA-A8-A09N-01A	5.27051	2.24293	3.20636	2.87288	2.19904	3.90696	4.02623	3.93821	3.50616	2.85874	3.28372	3.86448	3.2334	4.19686	3.23925	4.2254	3.38188	Tumor	BRCA
TCGA-AC-A3QQ-01B	2.49787	3.00259	3.43869	1.46607	3.03484	3.03004	3.42069	3.51254	3.54543	0.858629	4.7383	4.00715	2.79853	2.91061	3.17049	3.29379	2.6977	Tumor	BRCA
TCGA-E2-A1BC-11A	3.13597	2.18129	2.08652	2.93464	1.82496	3.15433	3.99611	2.7316	2.5742	1.91187	2.69172	3.03837	2.90521	1.9302	1.61959	3.3235	2.36547	Normal	BRCA
TCGA-BH-A18V-06A	4.57252	2.75259	3.03257	3.76166	2.99748	3.47754	4.80643	3.69787	3.26869	2.57627	3.4073	3.77632	4.31255	3.09081	3.11268	3.97382	3.3304	Tumor	BRCA
TCGA-BH-A18H-01A	4.12143	2.65066	2.92337	2.34776	2.13272	3.06802	3.93242	3.99882	3.64025	2.89057	3.59821	3.81052	2.7468	3.36994	3.24861	4.05266	3.16146	Tumor	BRCA
TCGA-E2-A1LH-01A	4.4545	2.06686	2.44598	2.81819	2.06246	3.85024	3.33848	3.17076	2.12413	2.35967	2.67041	3.72126	2.60216	2.4424	3.01824	2.86276	2.9584	Tumor	BRCA
TCGA-C8-A27A-01A	2.54126	2.52668	3.56349	3.13613	3.70331	4.46315	5.39981	4.40322	3.28276	2.1669	3.91681	5.02821	3.12456	3.41067	4.52172	3.74481	3.75526	Tumor	BRCA
TCGA-E9-A1R4-01A	4.45105	2.54997	2.68152	2.18565	2.31518	3.63248	4.04402	3.62667	3.17971	2.90351	3.64611	3.73668	3.70695	2.89067	2.87287	3.94616	3.30091	Tumor	BRCA
TCGA-A2-A3XU-01A	5.32835	2.39784	2.60085	3.51074	1.42034	3.9516	3.12866	3.68454	1.67944	2.57192	2.45746	2.74608	3.69912	3.03021	4.11932	2.89038	2.16791	Tumor	BRCA
TCGA-HN-A2NL-01A	5.30555	2.51228	2.61005	4.34228	2.04778	5.03875	4.35128	4.24632	2.64093	2.89182	2.92855	3.47077	3.53526	3.68563	3.7767	2.70245	3.57306	Tumor	BRCA
TCGA-BH-A0BO-01A	3.40557	2.4115	2.91058	2.54663	2.51552	3.16678	4.03087	3.72001	3.41424	2.87204	3.57098	4.11555	2.89945	2.77191	2.76859	4.14525	2.8554	Tumor	BRCA
TCGA-D8-A1Y0-01A	4.13003	2.54249	3.07149	2.71832	2.30805	3.87828	4.2927	4.49932	3.43759	2.00553	3.8693	3.85293	3.34495	3.57799	3.6759	3.85282	4.76029	Tumor	BRCA
TCGA-B6-A40B-01A	4.91531	2.38119	2.78574	2.83826	2.05005	3.28869	3.2665	3.8012	2.70703	1.95553	2.72705	3.75732	3.87333	3.6448	2.84361	3.72694	2.81276	Tumor	BRCA
TCGA-PL-A8LX-01A	3.42331	2.56109	2.71611	2.61907	2.24653	3.27037	3.89836	3.39473	2.20067	1.80648	2.77749	3.85712	3.44194	4.25235	2.62754	3.57488	3.46128	Tumor	BRCA
TCGA-B6-A1KF-01A	4.04189	2.16905	2.6807	2.39887	2.50001	4.26028	4.7177	3.89714	2.003	2.43996	3.45645	3.66394	2.20374	3.03494	3.46181	3.80228	3.82945	Tumor	BRCA
TCGA-AO-A0J7-01A	4.07314	2.52504	2.60004	2.22908	2.67811	3.84824	4.07734	3.94013	3.34318	2.41356	3.27581	4.39059	3.81254	3.69671	3.2669	3.76548	3.24176	Tumor	BRCA
TCGA-EW-A2FV-01A	5.01547	2.45507	3.41142	2.43579	2.77841	3.90641	4.4022	4.05504	3.13066	2.49761	3.33673	4.55906	3.63144	3.03588	3.34656	3.33402	3.55294	Tumor	BRCA
TCGA-AR-A252-01A	3.05889	2.81835	2.66673	2.37894	3.5029	4.11236	5.01004	4.15255	3.41661	2.75118	3.45817	4.66893	2.82637	2.93228	3.27445	4.16427	4.7455	Tumor	BRCA
TCGA-AN-A0XR-01A	4.00968	2.56222	2.78748	2.84408	2.6143	3.72984	3.58655	3.72216	3.57166	2.52962	3.86413	3.93753	3.35331	3.47465	3.14113	3.68836	3.12101	Tumor	BRCA
TCGA-A2-A0YC-01A	3.2782	2.71365	2.94465	2.298	2.86187	3.79588	3.89464	3.78149	2.9022	2.41639	3.54099	4.59416	3.53379	3.40566	3.22377	3.84912	3.1344	Tumor	BRCA
TCGA-A8-A07P-01A	3.46355	2.07264	2.59003	2.45511	2.8014	3.52448	4.18131	3.62554	2.78808	2.62389	2.5618	4.24065	3.23916	3.85543	3.35984	4.15468	3.69937	Tumor	BRCA
TCGA-BH-A1FR-11B	3.59191	2.47151	2.49773	2.63242	2.64538	3.42579	4.6043	3.79155	3.33601	2.73682	3.22057	4.18969	3.0037	2.66131	2.71581	3.82715	3.06686	Normal	BRCA
TCGA-E9-A3X8-01A	4.96977	2.27197	2	3.37339	1.8189	3.47228	2.89099	2.88425	1.95904	2.13476	1.98157	2.94163	4.44846	2.2905	2.61547	2.78464	2.90032	Tumor	BRCA
TCGA-AC-A2B8-01A	3.33712	2.54781	2.80992	2.46545	2.8916	3.39967	3.95825	3.78347	2.8923	2.45879	3.41221	4.2701	3.42057	3.29935	2.86987	3.62572	2.89934	Tumor	BRCA
TCGA-AO-A0JL-01A	5.1661	2.3506	2.37587	2.29051	1.755	3.40709	4.02255	3.24877	2.31533	1.58241	3.51577	3.07364	2.59753	2.55804	2.78786	3.03624	2.53578	Tumor	BRCA
TCGA-BH-A1FB-11A	4.14889	2.58061	2.76887	2.75573	2.49599	3.40739	4.77503	3.99166	3.63246	2.82664	3.46322	4.27325	3.27327	2.90663	2.93483	3.7865	3.14712	Normal	BRCA
TCGA-D8-A27W-01A	4.31112	2.38093	3.09508	2.13433	3.64337	3.83171	4.83003	3.84786	2.77666	2.22191	2.99679	4.82315	4.56911	3.32968	3.316	3.50176	3.73536	Tumor	BRCA
TCGA-B6-A0RO-01A	3.3274	2.2582	2.82643	2.58137	3.38277	3.88343	5.23911	3.61552	3.22606	2.39044	2.55694	4.55473	2.8084	3.60844	3.02108	1.78862	3.65636	Tumor	BRCA
TCGA-BH-A0DE-01A	3.18411	2.53165	2.81423	2.48638	2.22573	3.54344	3.90571	3.74784	3.0869	2.08862	3.15677	3.84892	3.30084	2.78427	3.14204	4.04825	3.0082	Tumor	BRCA
TCGA-D8-A147-01A	4.55608	2.98853	3.44306	2.63194	2.75453	4.72785	4.86621	4.34883	3.01702	2.95403	3.93804	4.49057	3.55985	3.03768	3.61665	4.46291	4.10332	Tumor	BRCA
TCGA-BH-A202-01A	3.72893	2.07013	2.63196	2.23837	2.70406	4.02447	4.07193	3.74561	2.81371	2.66265	3.2786	4.16186	2.91784	3.50577	3.80741	3.38209	3.24	Tumor	BRCA
TCGA-BH-A18R-01A	4.54412	2.83102	2.76862	2.87355	2.89787	3.62763	4.50367	4.28446	3.17157	3.03959	3.3597	4.35235	3.81476	3.47267	4.00436	3.7002	4.11951	Tumor	BRCA
TCGA-BH-A0HA-11A	3.59849	2.77966	3.19	2.70986	2.34045	3.39124	4.78813	4.25988	3.64742	2.07235	3.61598	4.36334	3.29579	2.79471	3.05224	3.65624	3.20756	Normal	BRCA
TCGA-B6-A0RV-01A	4.00042	2.5126	2.8245	3.29552	2.76692	3.66933	4.14324	3.82205	3.00587	2.70976	2.89375	4.42039	2.98395	3.23644	2.87068	3.94814	3.20985	Tumor	BRCA
TCGA-D8-A27P-01A	3.47481	2.66448	2.70743	2.61146	2.70828	3.75564	3.89031	3.90857	3.5172	2.69032	3.25117	4.1104	3.04345	3.76758	3.20211	3.8903	3.25892	Tumor	BRCA
TCGA-BH-A0W7-01A	3.95761	2.46463	2.68604	3.37634	2.70152	4.09815	3.86815	3.60855	2.82397	2.61087	3.27534	4.09578	3.33596	3.25823	3.14269	3.65806	3.59202	Tumor	BRCA
TCGA-BH-A0E1-11A	3.68627	2.63672	3.00651	2.88552	2.25809	3.48587	4.46478	3.44104	3.01401	2.57062	2.97676	4.14913	3.16063	2.8598	2.68029	3.80449	3.21326	Normal	BRCA
TCGA-AC-A7VB-01A	4.33853	2.78213	3.07563	3.16652	3.5551	4.44394	4.05451	5.49114	3.11011	2.67016	3.2142	4.49501	4.52295	4.00415	3.43244	4.1144	3.70735	Tumor	BRCA
TCGA-AN-A046-01A	3.54355	2.4566	3.13345	2.20592	2.66285	3.42917	3.32925	3.92167	3.28903	2.38138	3.00825	4.39152	3.17088	2.85826	3.25301	3.71278	3.25235	Tumor	BRCA
TCGA-A2-A0SX-01A	4.55793	2.85335	2.8485	2.74549	2.82037	4.12754	4.78212	4.46103	2.80353	2.56195	3.13845	4.57908	4.65357	3.15318	3.10398	3.88505	3.45442	Tumor	BRCA
TCGA-A8-A06N-01A	4.55638	2.40545	3.25856	2.68371	3.47585	3.73729	3.90801	4.03399	3.39937	2.91769	3.28376	4.57507	3.79864	3.93184	3.37386	3.5668	3.75117	Tumor	BRCA
TCGA-BH-A8G0-01A	4.62607	2.67924	2.67769	2.77274	2.15566	3.2468	3.84875	3.47936	3.25014	2.36012	3.1051	3.74337	3.51812	2.88751	2.85749	3.681	2.83288	Tumor	BRCA
TCGA-BH-A0HP-01A	3.99539	2.36994	2.84518	2.34753	2.61956	3.60597	4.10355	3.5152	2.55279	2.58848	2.80087	4.28741	2.92554	3.20588	2.69249	3.85421	3.17554	Tumor	BRCA
TCGA-BH-A18U-01A	3.61219	2.41073	2.62516	2.64479	2.90782	4.05529	4.28822	3.90873	3.23314	3.1458	3.396	4.19783	3.44895	3.98755	4.42824	3.7451	4.09161	Tumor	BRCA
TCGA-AN-A0AS-01A	4.24022	2.3635	2.49127	2.16771	3.07085	2.73437	4.24685	4.09491	2.44207	2.36389	2.71589	5.09958	2.76981	3.5267	2.45464	3.57285	2.88152	Tumor	BRCA
TCGA-AO-A0JC-01A	4.72346	3.0262	3.18857	2.92294	2.80104	3.9623	4.3523	4.17253	3.91859	2.20857	3.91913	4.60601	3.75198	3.44791	3.36595	4.15234	3.06062	Tumor	BRCA
TCGA-BH-A1F2-01A	2.61084	2.32414	2.50471	1.64814	3.4614	4.28868	4.44812	3.8362	2.8202	2.47586	3.25212	4.45125	2.70888	2.81456	3.99335	3.77489	4.38037	Tumor	BRCA
TCGA-BH-A18M-01A	4.42109	2.52246	2.87513	2.45321	2.78304	3.77441	5.16901	3.82961	3.04564	2.40796	3.2918	4.23681	3.3925	3.36772	3.45879	3.70744	3.14751	Tumor	BRCA
TCGA-C8-A12L-01A	3.97872	2.59106	3.61112	1.92146	3.24469	4.08349	4.78919	3.86391	2.92709	2.44819	3.54689	4.66352	3.33264	3.12785	2.6344	4.00198	3.69906	Tumor	BRCA
TCGA-E9-A1R7-01A	3.70167	2.90363	2.49391	2.02818	2.76471	4.11869	4.0677	4.18988	3.2586	2.0365	3.99368	4.4926	2.6953	3.66564	3.28444	3.86817	3.05148	Tumor	BRCA
TCGA-BH-A1FH-01A	3.13107	2.31852	2.79654	2.3102	2.58551	3.25164	4.61012	3.73555	3.22552	2.23221	3.21583	4.19485	3.24646	3.39285	2.75841	3.68768	2.92837	Tumor	BRCA
TCGA-AR-A24V-01A	3.20315	2.16865	2.66883	2.14886	2.72781	3.39987	3.9602	3.54659	3.23289	1.94224	2.846	4.00438	2.97431	3.02275	3.18682	3.94244	3.25801	Tumor	BRCA
TCGA-AC-A6IX-01A	3.7356	2.64742	3.23397	3.01304	2.72048	3.39245	3.82178	3.89521	2.86614	3.11613	3.4053	4.11769	3.56042	3.44676	2.72035	3.93298	3.35725	Tumor	BRCA
TCGA-D8-A1JH-01A	3.86733	2.62828	3.07794	2.13008	2.91435	3.68628	4.87205	3.87113	3.40296	2.45847	3.46939	4.38668	3.45907	3.36024	2.98183	4.04095	3.24016	Tumor	BRCA
TCGA-BH-A1FE-01A	3.78799	2.50995	2.92718	2.13676	2.74466	4.1022	4.57551	4.06724	3.11718	2.53539	3.55414	4.30793	2.61084	3.14495	3.52271	3.92638	3.12621	Tumor	BRCA
TCGA-A2-A25C-01A	3.66911	2.83693	2.83267	2.47795	3.81912	4.14275	5.11522	4.22728	3.83446	2.52965	3.71112	4.85773	3.51706	3.94583	3.52176	4.31424	3.53794	Tumor	BRCA
TCGA-B6-A0IQ-01A	4.14178	2.95267	2.96727	3.31301	2.40198	4.70682	4.33428	4.44267	2.82761	3.01476	3.86678	3.76981	3.12222	3.71459	4.02038	6.13369	3.50173	Tumor	BRCA
TCGA-AO-A0JI-01A	4.1288	2.20383	2.88714	2.41392	3.09437	3.98034	3.96234	3.91898	3.60199	2.11341	2.87458	4.53964	3.49618	3.7292	3.64842	4.35422	3.60292	Tumor	BRCA
TCGA-AC-A2FB-11A	3.39476	2.41572	2.56227	2.77056	2.35382	3.33715	4.46002	3.32192	2.78802	2.68389	2.96261	3.78213	2.93317	2.71328	2.61689	3.71305	2.98898	Normal	BRCA
TCGA-B6-A0IA-01A	2.6969	2.07977	1.6943	2.2261	2.86596	4.11277	3.53233	3.49513	1.93127	2.50294	2.62364	3.8351	2.76694	2.83521	2.81216	3.33964	2.95295	Tumor	BRCA
TCGA-E2-A1L7-01A	5.31782	3.0688	3.28329	2.32864	2.87347	3.83172	4.46364	3.96831	3.35111	2.55687	3.03153	4.82613	3.43947	3.86019	3.32094	4.28117	3.42137	Tumor	BRCA
TCGA-BH-A18F-01A	3.93575	2.62116	2.72624	2.67029	2.76477	4.0599	4.14111	3.92404	3.22304	2.70065	3.42292	3.91286	3.34358	4.0654	2.92031	4.30006	3.08477	Tumor	BRCA
TCGA-C8-A1HI-01A	3.12961	2.63355	2.93165	2.64025	3.07632	3.77062	3.86703	3.84777	2.88829	2.83256	3.59652	4.767	3.29834	3.49565	3.6644	3.64297	3.69428	Tumor	BRCA
TCGA-A2-A0YD-01A	3.8138	2.44475	2.89855	2.28152	2.79835	3.5978	4.02227	3.5459	2.98104	2.50477	3.38986	4.12977	3.25969	3.14728	2.99362	3.9065	3.31581	Tumor	BRCA
TCGA-A8-A06U-01A	3.94632	2.9193	2.68602	2.24175	2.92846	3.73599	4.59993	3.91622	3.03718	2.7072	3.67011	4.43017	3.44218	4.74715	3.472	3.55803	3.85575	Tumor	BRCA
TCGA-BH-A18S-01A	2.81478	2.7592	3.12132	2.55948	3.15403	3.91882	4.9129	3.69982	3.62109	2.55527	3.25375	4.25974	3.45835	3.39298	3.56257	4.31851	3.51729	Tumor	BRCA
TCGA-A8-A08S-01A	4.42871	2.56093	3.37297	2.07862	3.68718	3.72934	3.58786	3.85796	3.35069	2.35443	3.42387	4.71042	3.35246	3.91334	3.76903	3.85051	3.47971	Tumor	BRCA
TCGA-A8-A08C-01A	3.82951	2.68021	2.74941	2.56392	2.98508	3.69762	3.82694	3.93017	3.35839	2.60552	3.69472	4.30224	3.30922	3.66223	3.35229	4.1314	3.14916	Tumor	BRCA
TCGA-C8-A1HO-01A	4.16345	2.52924	3.2969	2.41458	3.17917	3.7656	4.32196	4.07437	3.05049	2.32948	3.58418	4.69995	3.08591	2.92699	3.36754	4.08262	3.39771	Tumor	BRCA
TCGA-AO-A0JG-01A	3.48912	2.67034	3.37767	2.64291	3.20586	3.53248	4.6317	4.01414	3.27326	2.60848	3.48609	4.48782	3.47658	3.35777	3.23172	4.2683	3.44523	Tumor	BRCA
TCGA-E9-A1NF-01A	3.52938	2.03995	2.15192	1.9623	2.61996	2.68168	3.77983	3.24767	2.61847	2.02853	2.7175	4.24326	2.70489	2.85666	2.48537	3.22565	2.63689	Tumor	BRCA
TCGA-AO-A0J6-01A	3.94115	2.11357	3.19562	3.04471	2.21332	3.52164	4.44836	3.85334	2.5823	2.72198	2.80856	3.53823	3.67787	3.33167	3.32361	3.50618	3.24455	Tumor	BRCA
TCGA-LL-A5YP-01A	5.06102	2.32097	3.2563	3.59034	2.07074	4.19862	4.67391	3.69305	2.28109	2.61952	3.20201	3.56776	4.28072	2.81487	3.59388	3.55029	3.06062	Tumor	BRCA
TCGA-BH-A0DI-01A	3.88714	2.49845	2.34626	2.56288	2.45318	3.47295	4.20125	3.36361	2.70951	2.02601	2.73889	3.88958	3.06594	3.11205	2.59872	3.56155	2.86064	Tumor	BRCA
TCGA-BH-A1FJ-01A	3.35794	2.71818	3.03286	2.57337	3.30084	4.42463	5.28194	3.9904	3.69286	2.59339	3.48802	3.98695	3.35395	3.81731	3.62026	4.20362	3.53015	Tumor	BRCA
TCGA-UU-A93S-01A	4.29625	2.35799	2.75079	3.34224	1.81758	3.94987	3.49559	3.1004	1.97506	2.93574	2.30934	3.03256	3.33935	3.01542	2.81139	2.8222	3.42378	Tumor	BRCA
TCGA-A2-A0YE-01A	4.15736	2.9034	2.91327	2.42621	3.42264	4.61083	4.31748	3.69748	1.83478	3.00184	3.73264	4.72369	3.32416	4.03711	3.80353	2.87273	3.49584	Tumor	BRCA
TCGA-BH-A209-01A	4.56905	2.90726	3.39021	3.00667	3.27611	4.4668	4.31386	3.98156	3.48014	3.01774	3.25093	4.51299	3.27883	3.34949	3.8488	3.91859	3.33079	Tumor	BRCA
TCGA-OL-A5RX-01A	4.57314	2.81691	3.0209	3.47483	2.50437	3.65839	3.92034	3.91179	3.11929	2.48133	3.67896	4.0814	3.7615	2.99423	3.34105	3.44249	3.06428	Tumor	BRCA
TCGA-E2-A15D-01A	4.34255	2.68195	2.85237	3.04437	2.80057	3.71303	3.87767	3.91614	2.9991	2.6809	3.98135	4.24789	3.37215	3.41121	3.16241	3.81765	3.20593	Tumor	BRCA
TCGA-D8-A27H-01A	3.62253	2.65223	2.88073	2.23812	2.81901	3.2765	4.37227	3.37167	3.02136	2.44122	3.03714	4.5482	3.13825	3.01554	2.67304	3.5173	3.43423	Tumor	BRCA
TCGA-BH-A1F6-01A	4.55392	2.17826	2.44542	3.31248	2.64791	4.90461	4.35473	3.72488	2.26783	2.94376	3.0846	3.95644	3.06528	3.13003	3.46905	2.81189	3.58845	Tumor	BRCA
TCGA-A1-A0SD-01A	3.61621	2.67266	2.95771	2.56914	2.94079	3.72531	4.05079	3.82879	2.73574	2.01941	3.34958	4.41105	3.21776	3.51453	3.13806	4.35881	3.53846	Tumor	BRCA
TCGA-A7-A26J-01B	4.02609	3.65603	2.87864	2.62316	3.16462	3.21103	4.71265	5.90706	4.15356	1.92092	4.23496	5.10809	3.32531	2.35228	3.86589	3.64332	3.4551	Tumor	BRCA
TCGA-D8-A1XC-01A	3.48396	2.58057	2.64283	2.09029	2.63678	3.55051	4.53403	3.80778	3.21285	2.40749	3.37303	4.18874	3.54085	3.09729	3.09917	3.8446	3.13097	Tumor	BRCA
TCGA-A2-A04R-01A	4.35219	2.32627	3.27357	2.95171	2.92158	3.70192	4.0195	4.48686	2.46948	2.14112	3.25252	4.24173	3.39056	3.89831	3.41714	3.93822	3.45444	Tumor	BRCA
TCGA-LD-A66U-01A	4.47312	2.44579	2.41654	3.27559	1.83987	3.64919	3.1525	3.62765	2.69808	2.28045	2.62113	3.25375	4.28883	3.05973	2.74826	3.34308	3.54441	Tumor	BRCA
TCGA-E2-A15O-01A	5.15775	2.88553	3.56675	2.69576	3.00993	4.12324	4.43668	4.26881	2.95454	1.82201	4.01891	4.55988	3.81502	3.89119	3.2718	3.85903	3.86129	Tumor	BRCA
TCGA-AR-A24T-01A	3.19149	2.54634	2.89311	2.43768	3.05731	3.89261	4.31506	3.9508	3.38783	2.67453	3.12986	4.48813	2.88925	2.86097	2.97706	4.13053	3.42588	Tumor	BRCA
TCGA-BH-A0HO-01A	3.38796	2.41033	2.75642	2.33988	2.78765	3.64914	3.44848	3.58794	2.57173	2.40418	2.63116	4.21497	3.12652	3.78515	3.06087	3.61568	3.14382	Tumor	BRCA
TCGA-A7-A6VW-01A	5.08786	2.84347	2.04757	4.00316	1.75185	4.56302	3.72524	3.30832	1.94691	3.38	2.31593	3.35338	4.20614	3.7649	3.42526	3.23249	2.78988	Tumor	BRCA
TCGA-E2-A153-11A	4.2576	2.69298	2.85903	2.7176	2.43711	3.29308	4.289	3.77031	3.32349	2.14949	3.14868	4.0455	3.46549	2.94057	2.93133	3.82242	3.0067	Normal	BRCA
TCGA-BH-A0HY-01A	3.16595	2.46724	2.70448	2.58795	2.83806	3.47888	4.28541	3.8537	2.33606	2.66661	2.68506	4.50205	3.33855	2.96527	2.69254	3.90457	3.10164	Tumor	BRCA
TCGA-3C-AALJ-01A	5.4258	2.4245	2.26661	3.03144	2.16046	4.06277	3.95546	3.94876	2.91043	2.35675	3.26595	3.61485	3.81486	3.54446	3.61285	3.80811	3.52463	Tumor	BRCA
TCGA-BH-AB28-01A	4.97698	2.76953	3.097	3.00062	2.8223	3.68689	3.87343	3.81192	3.38882	2.22263	2.98905	4.16975	3.86763	3.75512	3.18198	4.07568	3.21999	Tumor	BRCA
TCGA-A7-A0CG-01A	2.97401	2.45862	2.78172	2.42042	2.91705	3.76695	4.22133	3.66586	2.90592	2.6319	3.16279	4.26935	3.30521	3.02045	2.96045	3.93406	3.47993	Tumor	BRCA
TCGA-A8-A08H-01A	3.77149	2.33301	2.62234	2.55857	2.66866	3.93455	4.30604	3.41245	2.86536	2.71028	2.85774	3.86284	3.10997	3.0924	2.90563	3.73408	2.87083	Tumor	BRCA
TCGA-B6-A0WV-01A	3.26162	2.58522	2.71521	2.71108	2.57274	4.03731	5.20688	4.25196	2.90308	2.41834	3.25673	4.07767	3.21979	3.89371	3.31144	4.47718	4.05821	Tumor	BRCA
TCGA-D8-A1XF-01A	5.24094	2.20153	3.48061	3.07756	3.72525	4.37734	5.05773	4.14207	2.71369	3.68353	3.26002	4.60845	3.8381	3.07045	3.99964	3.71159	3.26949	Tumor	BRCA
TCGA-BH-A0BQ-01A	3.73767	2.33389	2.75872	2.68851	2.42391	3.82488	3.82791	3.35075	2.18793	2.55919	3.02825	3.82644	3.49652	3.21163	2.93986	3.73145	3.16605	Tumor	BRCA
TCGA-E9-A1RF-11A	2.20032	2.24945	2.18053	2.17917	2.57957	3.42369	4.09233	3.11474	2.98685	2.22551	2.98599	3.93958	2.21467	2.04211	2.5028	3.39817	2.52526	Normal	BRCA
TCGA-EW-A1PC-01B	4.56672	2.67473	2.60291	3.68014	2.65748	4.41213	4.47705	3.99791	3.07923	3.43077	3.07453	4.11909	3.56932	4.5503	4.05247	1.60442	3.78337	Tumor	BRCA
TCGA-A8-A08I-01A	4.15896	2.34627	2.64394	2.44903	3.04657	3.88194	5.54634	3.75154	3.13208	2.79886	3.79192	4.44756	4.38176	4.1186	3.11943	3.46654	3.8245	Tumor	BRCA
TCGA-B6-A0X4-01A	3.47677	2.46583	2.67581	2.4154	2.68773	3.79139	4.05982	3.73421	2.85131	2.29674	3.02318	4.26886	3.20027	2.65601	3.27493	3.48792	3.09011	Tumor	BRCA
TCGA-E9-A2JS-01A	4.74925	2.53997	3.17743	2.98342	2.4889	4.24771	3.65872	4.06537	3.09363	2.14527	3.07645	3.77839	4.47288	3.65673	4.84078	3.10744	3.1416	Tumor	BRCA
TCGA-A8-A096-01A	3.60057	2.6481	3.00535	1.94911	2.82132	3.84565	3.83697	3.47582	2.98887	2.33657	3.07459	4.07663	3.32646	3.65852	2.96692	3.83475	2.97213	Tumor	BRCA
TCGA-BH-A1F6-11B	2.18046	2.27006	2.41901	2.17224	2.76213	3.55773	4.6137	3.59309	3.19357	2.24525	3.33818	4.21125	2.31582	2.37112	2.75782	3.52712	3.06297	Normal	BRCA
TCGA-B6-A0WY-01A	4.17925	2.53606	2.60352	2.67841	2.53395	3.90396	4.67339	3.72919	2.81793	2.72397	2.88614	3.93909	3.32513	3.39814	2.92643	3.56786	3.60779	Tumor	BRCA
TCGA-BH-A18V-11A	3.60427	2.66858	2.53969	3.26654	1.71644	3.51992	3.68314	2.9761	2.81493	2.71545	3.08425	3.59163	3.6368	2.28753	2.86512	3.14943	3.18123	Normal	BRCA
TCGA-A8-A09E-01A	4.04493	2.60737	2.59098	2.62111	2.95417	3.99762	4.65529	3.77058	2.67787	2.39232	3.00966	4.24187	3.8297	4.20577	3.53542	3.48142	3.71434	Tumor	BRCA
TCGA-BH-A1ES-06A	5.33157	2.53914	2.82982	2.94945	2.36207	3.17354	4.827	3.55264	2.06887	1.4272	2.92614	3.83086	3.75317	3.15977	2.82448	2.83962	2.85723	Tumor	BRCA
TCGA-EW-A1OW-01A	3.87299	2.65641	2.58897	3.15674	2.50549	4.13139	5.29694	4.27366	2.59541	2.92282	3.53421	3.81416	3.18721	3.49696	3.59887	4.34841	3.7964	Tumor	BRCA
TCGA-D8-A1XD-01A	4.7064	2.63496	3.08418	2.37886	2.97467	3.81151	5.24807	4.17346	3.24572	2.40587	3.44312	4.65708	3.87146	3.86194	3.45589	3.98008	3.74929	Tumor	BRCA
TCGA-E9-A54X-01A	4.38622	2.56508	2.77147	3.45332	2.82504	3.70633	4.49172	3.62718	2.96056	2.49266	3.34894	4.14096	3.20106	2.9048	3.05404	3.57184	3.00906	Tumor	BRCA
TCGA-B6-A0RG-01A	3.81441	2.42474	3.17356	2.52381	2.83325	4.01669	3.19364	3.68684	1.96964	2.1385	2.889	4.23723	3.81723	3.91425	3.62432	3.69861	3.01353	Tumor	BRCA
TCGA-A8-A097-01A	3.06911	2.55289	3.21521	2.49113	2.77462	4.0069	5.17665	3.89236	2.89543	3.17972	3.29496	3.49614	3.77122	3.20387	3.07497	3.53113	3.79579	Tumor	BRCA
TCGA-A2-A0CX-01A	3.11922	2.56355	2.73778	2.55961	2.79571	4.01833	4.43416	3.72037	2.31814	2.24675	3.25553	3.96604	3.39886	3.2565	3.16458	3.29766	3.22734	Tumor	BRCA
TCGA-E9-A5FK-01A	4.58165	2.49395	2.19109	3.21687	1.79661	3.35795	3.2514	2.9836	2.38378	2.79483	2.53413	3.20597	3.74141	3.01049	2.53817	3.05836	3.15226	Tumor	BRCA
TCGA-BH-A1FG-11B	1.54239	2.2665	2.18711	1.8144	2.31076	3.35679	4.96557	3.73629	3.32202	2.43375	3.1387	4.50157	1.50942	2.09378	2.99298	3.57917	3.70709	Normal	BRCA
TCGA-C8-A8HQ-01A	3.43736	2.89405	2.97362	2.13388	2.877	3.75892	3.69281	3.85442	2.61215	1.9005	3.10824	4.03602	3.9286	3.45437	3.41131	4.19965	2.8878	Tumor	BRCA
TCGA-BH-A0BP-01A	4.01669	2.31987	2.33356	2.4881	2.49522	3.19557	3.92134	3.76709	2.6955	2.56129	3.13343	4.02144	2.73402	3.69482	2.7976	3.8838	3.22666	Tumor	BRCA
TCGA-B6-A0RL-01A	4.22641	2.3881	3.32468	3.07196	2.73741	4.34516	4.04777	4.22403	2.94394	3.30944	3.92086	4.09766	3.93431	3.99473	3.42011	3.33893	4.10052	Tumor	BRCA
TCGA-A8-A08F-01A	4.02852	2.28635	4.25165	2.23239	2.82669	3.58651	4.36899	4.2742	3.09958	2.67929	3.23644	3.46235	3.19347	4.59497	2.90469	4.30319	3.57992	Tumor	BRCA
TCGA-A2-A0CK-01A	4.48773	2.75251	2.76309	3.26895	2.29471	3.41644	3.45042	3.71532	2.41389	2.25502	2.89916	3.87034	3.82271	3.16349	3.03262	3.98136	3.28964	Tumor	BRCA
TCGA-E9-A1N4-01A	3.49915	2.09518	2.83883	2.22635	2.92382	3.42032	4.0665	3.73445	3.17584	2.50566	3.09943	4.52752	2.89436	3.16635	2.95297	3.71692	2.96556	Tumor	BRCA
TCGA-D8-A1XZ-01A	5.30728	2.72126	3.07754	2.30956	2.78037	3.77102	5.0214	3.78748	3.12923	2.56726	3.22882	4.41645	3.02965	3.90999	3.33844	3.62179	3.86455	Tumor	BRCA
TCGA-AR-A1AS-01A	3.35369	2.52854	3.00627	2.73047	2.78841	4.06138	4.71602	4.02164	2.55765	2.93188	3.76223	4.00236	3.60516	3.50239	3.29379	3.57582	3.41873	Tumor	BRCA
TCGA-BH-A18N-11A	3.36164	2.73059	2.78658	2.73858	2.46435	3.3404	4.44086	3.58841	3.54219	2.12063	3.37189	4.07059	3.26933	2.80897	2.7603	3.77717	2.826	Normal	BRCA
TCGA-EW-A424-01A	4.5953	2.57378	3.00805	3.1151	1.83103	3.47808	3.63987	4.0511	2.53	2.02318	3.25304	3.40443	4.06833	2.71907	3.3931	3.75612	3.04959	Tumor	BRCA
TCGA-A7-A3RF-01A	4.09416	2.54923	2.4398	2.43861	2.02489	3.2904	3.85681	3.27904	2.42111	1.94354	2.58334	3.8982	3.83661	2.58418	2.79414	3.29082	2.79253	Tumor	BRCA
TCGA-AR-A24H-01A	4.859	2.34252	3.63526	2.80271	3.33207	4.441	4.77111	4.38221	3.13498	2.7511	3.74124	5.0108	4.14766	3.20137	3.86632	4.03106	4.01013	Tumor	BRCA
TCGA-A8-A06T-01A	4.06364	2.18733	2.80644	2.83836	2.60197	4.03944	4.17365	3.93943	3.25334	2.61171	3.22918	3.79399	3.38969	3.92683	3.5738	4.50631	3.59192	Tumor	BRCA
TCGA-C8-A1HL-01A	3.26242	2.36021	2.26346	2.81457	2.9777	4.1574	4.44278	3.8914	2.40918	2.06423	3.11714	4.49887	2.94962	2.77224	3.29806	3.28232	3.27916	Tumor	BRCA
TCGA-D8-A1X8-01A	3.32307	2.73006	3.02398	2.39229	3.19629	3.9415	4.32878	3.60045	3.31433	2.64832	3.34444	4.40725	3.311	3.41079	3.51659	4.17324	3.35681	Tumor	BRCA
TCGA-AO-A1KT-01A	4.10275	2.3288	2.71118	2.91204	2.92205	3.72234	3.62415	3.73181	1.92868	2.12165	3.1422	3.9916	2.98081	4.03823	3.16774	3.73648	3.73059	Tumor	BRCA
TCGA-E2-A15K-11A	3.70085	2.39603	2.18778	3.16841	1.78987	2.98799	3.49479	2.82614	2.25343	2.63705	2.50708	3.18842	3.23074	2.33191	2.25887	3.16072	2.82122	Normal	BRCA
TCGA-B6-A0RQ-01A	3.51955	2.77919	2.8878	2.87982	2.33562	3.57073	4.63069	3.75775	3.29145	2.78341	3.34632	4.14517	3.36441	2.91025	3.04045	3.89796	3.1957	Tumor	BRCA
TCGA-AR-A1AQ-01A	5.12166	2.81102	2.84289	3.41321	2.49856	4.77174	4.48398	3.80284	2.49498	2.86345	2.83946	3.92941	3.55257	3.6799	4.22791	3.1397	3.4601	Tumor	BRCA
TCGA-OL-A5D6-01A	4.04831	2.40802	2.37859	2.81753	2.11408	3.47346	2.79371	3.29616	2.4559	2.32875	2.58469	3.60658	3.82658	2.75225	2.64441	3.42411	2.79063	Tumor	BRCA
TCGA-A8-A091-01A	4.15534	2.34831	3.12225	2.4793	3.07434	3.22676	4.20042	3.89849	3.19198	2.46947	3.8378	4.4371	3.15645	3.54051	2.93393	3.70617	4.79844	Tumor	BRCA
TCGA-A7-A4SE-01A	4.95767	2.7097	3.10725	3.65815	2.06615	3.54212	4.0486	3.76271	2.09886	3.11327	3.51454	3.67039	3.36011	3.60272	3.71713	2.99952	3.25595	Tumor	BRCA
TCGA-AC-A2FE-01A	4.01678	2.5944	2.70518	2.85369	2.65303	3.51664	3.91171	3.67057	3.07925	2.081	2.84908	4.11518	3.56464	3.17648	2.9282	3.7723	3.15735	Tumor	BRCA
TCGA-BH-A1F2-11A	3.51808	2.53417	2.59944	2.67951	2.08758	3.2578	4.2723	3.33523	3.39903	2.04497	3.37749	3.76315	2.92797	2.28804	2.40736	3.64953	2.62286	Normal	BRCA
TCGA-E9-A1ND-11A	3.6776	2.40234	2.34258	2.98817	1.938	3.29664	3.44092	3.07153	2.48313	2.50112	2.4966	3.24214	3.29364	2.61401	2.47675	3.38761	2.81562	Normal	BRCA
TCGA-C8-A26Z-01A	3.55398	2.14815	2.88489	2.82967	2.82455	3.66934	4.66692	4.04238	2.78191	2.14768	3.357	4.15529	4.07426	3.45768	3.58231	3.70026	3.45294	Tumor	BRCA
TCGA-C8-A12Y-01A	3.27321	2.61901	3.07958	2.89379	2.42817	4.2299	3.30736	3.62466	2.28309	2.83336	3.40372	4.0858	3.55517	3.67886	3.18394	3.86612	3.71466	Tumor	BRCA
TCGA-A7-A13F-01A	3.81463	2.22285	2.55733	2.63004	2.51882	4.00146	4.35674	3.81639	2.30378	2.05993	2.56622	3.9363	3.65436	3.78766	3.29684	3.7067	4.56018	Tumor	BRCA
TCGA-BH-A28Q-01A	3.96861	2.53674	2.91133	2.58821	2.94723	3.76333	4.0404	4.05369	3.02371	2.42592	3.80689	4.23637	3.2324	3.86776	3.34695	3.9488	3.76475	Tumor	BRCA
TCGA-GM-A5PV-01A	3.70976	2.68296	2.8696	2.82903	2.49771	3.7753	3.52073	3.62155	3.1274	2.44035	2.99395	3.97762	3.21985	3.65186	3.30045	3.64776	3.34257	Tumor	BRCA
TCGA-A7-A4SC-01A	4.57425	2.6508	2.81253	3.0136	2.6201	3.36645	3.81148	3.88254	3.18222	2.27117	3.26422	3.9943	3.74344	3.23653	3.26217	3.86584	3.17118	Tumor	BRCA
TCGA-A8-A09G-01A	3.89694	2.55612	2.03271	2.61004	2.97883	3.36648	3.77648	3.9536	3.09567	2.69363	3.39746	4.45614	2.98906	3.64519	2.9669	3.97862	3.34331	Tumor	BRCA
TCGA-A7-A13E-11A	2.92538	2.20266	2.26157	2.4691	2.4247	3.4313	4.12003	3.0651	2.5929	2.25288	2.62246	3.7056	2.50975	2.51515	2.59935	3.44652	2.6617	Normal	BRCA
TCGA-E2-A15H-01A	4.93139	2.7309	2.92273	2.81278	2.75978	3.80251	4.11354	4.03556	3.41025	2.82778	3.34984	4.19203	3.49555	3.91316	3.29473	3.98461	3.41868	Tumor	BRCA
TCGA-A7-A13E-01B	2.22161	3.25716	2.60395	1.74433	3.58192	3.63466	5.22227	5.15535	4.65779	1.43667	3.54311	5.14091	2.19808	2.03332	3.31417	3.54247	3.14897	Tumor	BRCA
TCGA-B6-A0IH-01A	3.90251	2.62248	2.66135	2.77035	2.30317	3.3531	4.15849	3.61242	3.21469	2.59912	3.60878	4.21568	3.35767	2.93823	2.87659	3.98238	3.48844	Tumor	BRCA
TCGA-A2-A1G4-01A	4.16825	2.45581	3.13698	2.72488	3.22941	3.90044	4.91748	4.01985	2.57199	3.15984	3.24926	4.52356	3.59739	3.60996	2.98125	3.87466	3.07213	Tumor	BRCA
TCGA-A8-A093-01A	3.64161	2.61482	2.56303	2.6102	2.46721	3.597	3.89289	3.76303	3.11675	2.3286	3.40658	4.10544	3.55909	3.49517	3.13232	3.69451	3.41511	Tumor	BRCA
TCGA-C8-A12O-01A	4.11884	2.13193	2.35564	2.30843	3.10637	3.65983	4.49509	3.79267	2.72446	2.76318	3.27562	4.22243	3.03165	3.67765	2.82116	3.61575	3.03118	Tumor	BRCA
TCGA-AO-A1KQ-01A	4.80443	2.3817	2.90408	3.16413	2.32118	4.00227	4.19745	4.26661	2.91827	2.28453	3.03078	3.75468	2.85716	3.70849	3.52462	3.59367	3.62424	Tumor	BRCA
TCGA-AR-A256-01A	3.62572	2.57914	2.58385	2.95884	2.89199	4.1882	5.12979	4.16758	2.94782	3.06746	4.08198	4.45354	3.76775	3.40245	4.71839	2.59308	3.91218	Tumor	BRCA
TCGA-OL-A66I-01A	5.31839	2.80889	3.16495	3.11381	2.21661	4.00332	4.15832	3.82583	2.41367	2.84336	2.86868	3.54203	3.73996	3.08105	3.51983	3.44408	3.57767	Tumor	BRCA
TCGA-C8-A3M7-01A	3.70355	2.55802	2.90937	2.90895	2.64006	3.33222	4.13074	3.99483	3.34487	2.55443	3.60543	4.29262	3.21665	2.75234	2.96691	3.82275	3.44327	Tumor	BRCA
TCGA-A2-A04W-01A	3.00207	2.19871	2.37432	2.28045	2.0511	3.43701	3.59081	2.84904	1.55234	1.96095	2.41896	3.65158	2.80143	2.08168	2.96942	2.54275	2.96201	Tumor	BRCA
TCGA-OL-A97C-01A	4.32938	2.23828	2.77299	3.15055	2.09914	3.19921	4.40125	3.25888	2.94674	1.56361	2.6541	3.57351	3.4925	2.26745	2.95792	2.86781	2.92125	Tumor	BRCA
TCGA-AR-A1AM-01A	4.83935	2.73211	2.99184	3.05944	2.56567	3.50695	3.8817	3.9453	2.67466	2.92322	3.61472	4.0966	4.04789	3.52232	3.40477	4.13217	3.38556	Tumor	BRCA
TCGA-AR-A2LR-01A	4.09071	2.77221	3.49284	3.295	2.47919	4.05575	5.37649	5.45199	3.12642	2.39864	2.88634	4.60257	3.70394	3.03217	3.49451	3.13367	3.5308	Tumor	BRCA
TCGA-EW-A1OZ-01A	4.2816	2.20552	2.43772	2.11106	3.38763	4.19492	3.81026	3.56156	2.25636	1.85296	2.84709	4.55129	3.82217	3.51391	3.02063	3.20884	3.1477	Tumor	BRCA
TCGA-A1-A0SF-01A	4.45801	2.41396	2.96382	2.91307	2.39349	3.79819	3.99362	3.88235	2.7596	2.78172	3.08641	3.9289	3.35244	3.1083	3.25519	3.94716	3.46174	Tumor	BRCA
TCGA-A1-A0SJ-01A	3.91315	2.2902	3.02158	2.27149	2.93585	3.86191	4.99628	4.42101	2.32741	1.84169	2.79012	4.32666	2.94568	3.36796	3.06869	3.24367	3.82325	Tumor	BRCA
TCGA-A7-A13G-11A	2.46976	2.13375	1.98933	2.35852	2.15142	3.32816	4.06383	3.10942	2.81164	1.75898	2.9272	3.52342	2.40377	1.81849	2.03151	3.13224	2.4138	Normal	BRCA
TCGA-D8-A1JU-01A	3.5558	2.45419	2.43592	2.19519	2.64269	3.24302	4.29109	3.6151	3.28216	2.5538	3.08757	4.33265	3.50263	2.99327	2.79038	3.93723	3.09529	Tumor	BRCA
TCGA-A8-A07F-01A	3.9633	2.43516	2.64274	3.0585	2.91215	3.60945	4.13447	4.13734	3.52991	3.4356	3.66804	3.96317	3.15367	4.04507	3.67008	4.23919	3.53828	Tumor	BRCA
TCGA-A7-A6VY-01A	5.41667	2.9471	2.66968	3.56439	1.93929	3.52292	4.54643	4.03561	2.74705	3.28378	3.30998	3.39299	3.03691	3.69828	3.47807	3.61499	3.33532	Tumor	BRCA
TCGA-BH-A1FU-11A	4.01131	2.68942	2.75764	2.84713	2.27235	3.34669	4.74588	3.92447	3.70837	2.67215	3.4011	4.21727	3.37161	3.13387	2.88083	4.00609	3.03708	Normal	BRCA
TCGA-BH-A0BZ-11A	3.05129	2.35513	2.54958	2.44262	2.3758	3.33216	4.17959	3.23456	2.99173	2.31341	3.04832	3.95229	2.86553	2.6245	2.69166	3.62996	2.74566	Normal	BRCA
TCGA-A2-A0CU-01A	4.17472	2.3279	3.433	2.40286	2.62564	3.56243	3.94386	3.79093	1.93639	2.11844	3.12664	3.78381	3.66848	3.18839	3.14358	3.25333	3.25439	Tumor	BRCA
TCGA-BH-A18L-11A	3.65946	2.66167	2.68265	2.73111	2.44322	3.37078	4.18274	3.40905	3.22203	2.13442	3.10126	3.93038	3.14057	2.75354	2.7217	3.75462	2.80068	Normal	BRCA
TCGA-E9-A1NE-01A	3.98422	2.68527	3.10071	2.41499	2.84062	3.79433	4.8911	3.97605	3.31495	2.38867	3.58812	4.40345	2.92047	3.41286	3.2168	4.15671	3.61073	Tumor	BRCA
TCGA-A7-A0D9-01A	6.03053	2.41241	3.08223	2.80253	2.90043	4.1548	4.43262	3.53112	3.08353	2.11323	3.49535	4.66218	3.193	3.42989	3.24632	3.65387	5.39444	Tumor	BRCA
TCGA-C8-A12K-01A	3.72479	2.54706	3.30804	2.78299	2.58856	3.92676	4.31046	3.82763	2.67554	2.7963	3.16865	3.86267	3.18566	3.43165	4.03459	3.33729	3.49279	Tumor	BRCA
TCGA-A8-A07O-01A	4.98785	2.52919	2.93267	2.9576	2.44772	3.21842	5.196	4.0789	2.33497	2.9421	3.21097	3.72383	2.59944	3.72286	3.47326	3.59669	3.60809	Tumor	BRCA
TCGA-C8-A12U-01A	3.89409	2.85463	2.83131	2.82919	2.99407	4.33012	4.80765	4.34376	2.67873	2.26592	3.39504	4.19985	3.62578	4.22907	3.69578	3.21873	3.73577	Tumor	BRCA
TCGA-C8-A8HP-01A	4.41952	2.67596	2.49589	3.11689	2.05818	4.18712	4.30125	3.85019	2.30757	2.25793	3.22009	3.31185	4.31964	2.75975	3.19206	2.95819	2.78977	Tumor	BRCA
TCGA-A2-A3XV-01A	3.75339	2.50464	2.06526	3.35701	1.88701	3.90568	3.05933	2.74215	1.96092	2.37494	2.1072	2.67175	4.59567	2.67096	2.72803	3.08266	3.255	Tumor	BRCA
TCGA-BH-A0AW-01A	3.01174	2.37362	2.56074	2.72092	2.44119	4.1269	3.72617	3.32576	2.29216	2.45137	3.08454	3.74545	3.04551	3.2523	3.13374	3.46963	3.48454	Tumor	BRCA
TCGA-AN-A0FF-01A	3.8253	2.51068	3.25253	2.70503	2.79517	3.78977	4.63073	4.23933	3.25335	2.82004	3.36134	3.92827	3.76975	3.64547	3.12601	4.21016	3.4432	Tumor	BRCA
TCGA-AR-A24M-01A	2.88918	2.50817	3.11737	2.12139	3.36877	3.78816	5.04468	4.09687	3.33448	2.56442	3.25603	4.88708	2.8197	3.44584	3.108	4.05258	3.20419	Tumor	BRCA
TCGA-BH-A0DP-11A	3.71223	2.80283	3.13472	2.67478	2.19689	3.55581	4.5485	3.29826	3.32441	2.48273	3.31464	4.07832	3.32501	3.05256	3.21852	3.97324	3.09147	Normal	BRCA
TCGA-E2-A2P6-01A	4.59097	2.54638	2.98113	2.64131	2.44074	3.48525	3.33558	3.63603	3.42907	2.11364	3.60532	3.8241	3.34597	2.86595	3.1094	3.76663	3.01958	Tumor	BRCA
TCGA-C8-A130-01A	3.80477	2.24772	2.67081	2.62609	2.76042	4.31727	3.97712	4.06738	2.7529	2.91666	3.4586	4.28965	3.30524	3.58358	3.52099	3.95681	3.05228	Tumor	BRCA
TCGA-C8-A274-01A	4.0518	2.77732	3.03861	2.66868	2.69532	4.47241	4.04335	4.17603	3.43601	2.17679	3.48995	4.24293	3.56597	3.55028	3.36746	3.91025	3.62655	Tumor	BRCA
TCGA-E9-A1RD-11A	3.14093	2.473	2.37317	2.43788	2.35892	3.31665	4.10111	3.19256	2.99917	2.30847	2.9471	3.8546	2.63854	2.57313	2.36426	3.57081	2.69169	Normal	BRCA
TCGA-D8-A73X-01A	4.24969	2.62752	2.99927	2.76032	2.51554	3.54903	3.73752	4.05909	3.27418	2.75372	3.56424	3.95576	3.63095	3.08265	3.07255	3.9324	3.35054	Tumor	BRCA
TCGA-AO-A0JA-01A	3.99621	2.81324	3.00609	2.31226	2.97268	3.93305	4.07008	4.00888	2.6168	1.81694	3.10283	4.70688	3.63253	4.10652	2.72887	3.5949	3.17758	Tumor	BRCA
TCGA-LL-A5YN-01A	5.21285	2.71491	2.81868	3.4324	2.09599	3.65768	2.99654	3.27747	2.59404	2.47315	2.6562	3.24713	4.05034	3.14669	3.82342	2.71905	3.35657	Tumor	BRCA
TCGA-D8-A1XB-01A	3.67275	2.50186	2.75452	2.22733	2.64772	3.45062	4.28535	3.95327	3.20976	2.82635	3.6844	3.84011	3.28816	3.28576	3.13807	3.86144	3.55442	Tumor	BRCA
TCGA-LL-A6FP-01A	4.37151	2.35198	2.39466	3.61651	2.27496	3.80707	3.57599	3.6091	2.47503	3.07567	2.88077	3.44671	3.87958	3.56526	2.36043	3.1126	4.16448	Tumor	BRCA
TCGA-A7-A26E-01B	3.65998	3.50353	3.08204	2.20838	2.9531	3.34716	4.64829	5.43244	4.12466	0.995742	4.09481	5.26426	3.37683	2.72906	3.32286	3.63346	2.57703	Tumor	BRCA
TCGA-A7-A6VX-01A	4.84148	2.53524	2.82314	2.27031	2.18085	3.04472	4.26866	4.10014	3.09396	2.90178	3.61764	3.89249	3.58561	4.013	3.3568	4.25058	3.15416	Tumor	BRCA
TCGA-AC-A6IW-01A	5.36409	2.57838	2.6317	3.1834	2.30209	3.92644	3.75408	4.13294	2.45023	2.72096	2.48061	3.39212	4.84819	3.23342	3.89995	2.15107	3.66866	Tumor	BRCA
TCGA-BH-A0C3-01A	3.66201	2.48609	2.83448	2.57988	2.65253	3.70942	3.83838	3.50734	4.85829	2.12439	3.22608	3.93657	3.26248	3.9546	2.68302	3.80258	2.81665	Tumor	BRCA
TCGA-E9-A1NF-11A	3.31853	2.41255	2.44809	2.48025	2.44687	3.08425	3.87187	3.14023	2.86585	2.29606	2.74546	3.78828	2.94145	2.42653	2.23569	3.72908	2.5106	Normal	BRCA
TCGA-E2-A1L9-01A	3.01858	2.34903	2.76898	2.27142	3.03616	4.02269	4.23078	3.8923	2.88561	2.47941	3.65913	4.31537	3.0015	3.16698	3.43972	3.87392	3.17236	Tumor	BRCA
TCGA-BH-A1EV-01A	4.55282	2.53957	2.86203	1.99318	3.08032	3.95708	3.79417	4.62436	3.59236	2.52153	3.32948	4.1104	3.6991	3.67227	3.51718	4.10033	3.23656	Tumor	BRCA
TCGA-A2-A3XX-01A	6.09911	2.763	3.06335	2.85341	2.04362	4.16207	4.41557	3.81362	2.25802	2.06061	3.57634	3.45346	3.66423	3.7013	3.0619	3.4251	3.49164	Tumor	BRCA
TCGA-E9-A1NA-01A	3.62902	2.44878	2.76793	2.45198	2.50913	3.64008	4.34241	3.61801	3.8689	2.63929	3.0075	3.88332	2.60666	3.47202	3.12196	3.78058	2.81075	Tumor	BRCA
TCGA-EW-A1OY-01A	4.80275	2.35598	2.81168	3.06619	2.74375	3.55362	4.20704	3.89609	2.57572	1.90451	2.88673	4.40295	3.06583	3.79237	3.56357	3.42933	3.93198	Tumor	BRCA
TCGA-BH-A0AU-01A	4.67834	2.33061	3.23537	2.51334	2.70809	3.9118	4.84105	3.82481	2.57355	2.50203	3.31642	3.82606	3.90167	3.8728	3.34481	3.4812	3.60538	Tumor	BRCA
TCGA-B6-A0WS-01A	4.24246	2.57697	2.82165	2.44548	2.47095	4.09495	3.89305	3.43285	2.99443	2.58285	3.29711	3.90882	3.64212	3.24505	3.21691	3.83899	3.07582	Tumor	BRCA
TCGA-B6-A0I5-01A	4.51954	2.14316	2.16615	2.97524	2.55792	3.6181	2.75522	3.27922	1.96727	2.30101	2.6398	3.89846	3.08517	2.68962	2.76617	3.09666	3.39765	Tumor	BRCA
TCGA-E2-A14P-01A	3.86465	2.92048	2.54473	3.41049	3.38468	5.52412	4.62275	3.45386	2.54179	2.8404	3.18172	5.04695	3.51854	3.09999	3.58367	2.97211	4.4474	Tumor	BRCA
TCGA-GM-A2DF-01A	4.36974	2.06485	2.98477	3.0911	2.46635	4.12678	4.22566	3.5553	2.60309	2.22939	2.75449	3.9322	2.79406	3.18159	3.51564	2.92312	2.7681	Tumor	BRCA
TCGA-AQ-A04H-01B	4.08619	2.60375	2.83891	2.32395	2.38898	3.91198	4.8709	4.03366	3.04259	2.41996	3.52848	4.03982	3.08032	3.53701	3.35033	4.02549	3.82775	Tumor	BRCA
TCGA-AC-A6NO-01A	4.80629	2.77408	2.87257	3.34919	2.59434	3.84066	3.50062	4.09462	3.41282	2.80195	3.55281	4.01628	3.83363	3.88509	3.42662	3.86122	3.63029	Tumor	BRCA
TCGA-BH-A0E9-01B	3.6499	2.82296	2.70033	2.66564	2.8192	3.90972	4.25995	3.7375	3.47173	2.13919	3.42844	4.43756	3.23364	3.26322	3.16546	4.00668	3.56349	Tumor	BRCA
TCGA-E9-A1N4-11A	3.86377	2.91457	3.15385	2.53945	2.52354	3.42458	4.71127	4.22373	3.76767	2.24355	3.49369	4.50995	3.24182	2.8445	3.19426	3.71116	3.17391	Normal	BRCA
TCGA-BH-A0B1-01A	4.22716	2.24765	3.01449	2.59164	2.60192	3.61562	4.08665	4.61537	3.31712	1.97914	3.08664	3.78501	2.68136	3.86009	3.00636	3.91657	2.92097	Tumor	BRCA
TCGA-AR-A0TW-01A	4.12236	2.60905	3.0735	2.71793	3.21062	3.64819	4.47185	3.84801	2.68535	3.12888	2.95859	4.42008	3.67577	3.4397	3.71285	3.41163	3.54399	Tumor	BRCA
TCGA-AN-A0FX-01A	5.49686	2.41341	2.65404	2.93203	2.28415	4.41193	4.281	4.41305	2.86485	2.58653	3.04886	3.85895	3.77076	3.41694	3.31817	3.4579	3.03285	Tumor	BRCA
TCGA-BH-A0BD-01A	4.00456	2.60569	2.97942	2.62037	2.87541	3.89639	4.45687	3.97782	3.02944	2.04352	3.09274	4.02415	3.05469	3.4523	3.32791	3.89383	3.22578	Tumor	BRCA
TCGA-D8-A1JA-01A	2.35355	2.59776	2.68131	1.60202	3.51217	4.27625	4.69259	3.71781	3.30709	2.72675	3.3297	4.87322	2.66456	2.91186	3.4278	3.72508	3.62212	Tumor	BRCA
TCGA-S3-AA11-01A	4.88178	3.02272	3.18063	3.24629	2.50051	3.92141	4.21391	4.10271	3.94385	2.59736	3.47491	4.23474	4.4588	3.72484	3.56037	3.94693	3.40049	Tumor	BRCA
TCGA-AO-A03T-01A	3.47551	1.91247	2.43811	2.41601	1.65538	3.25674	3.89002	3.02917	1.68279	1.82633	2.50726	2.93336	3.26147	2.37134	2.93803	3.13167	3.55749	Tumor	BRCA
TCGA-AC-A3YI-01A	4.60784	2.53885	2.7627	2.91566	2.26107	3.07926	3.70395	3.71816	3.02242	2.69807	3.04794	3.76699	3.29305	3.04513	2.99377	3.65036	2.89424	Tumor	BRCA
TCGA-BH-A0B2-01A	4.65118	2.3925	2.72709	2.38756	2.97702	3.71152	3.77065	3.61361	3.03943	2.49924	3.08813	4.35182	3.74776	3.10498	3.60946	3.95786	3.27655	Tumor	BRCA
TCGA-LL-A7T0-01A	6.15033	2.57978	2.95694	3.30691	2.22768	4.12295	3.50809	4.0313	2.48262	1.58993	3.26473	3.82568	3.961	2.51096	3.07008	3.93507	3.5678	Tumor	BRCA
TCGA-BH-A0DH-01A	3.92246	2.48803	2.65354	2.86972	3.09699	4.08202	3.85905	3.53615	3.09764	2.67778	2.76693	3.78451	3.81471	4.02692	2.71857	4.03311	3.53183	Tumor	BRCA
TCGA-AC-A8OQ-01A	4.51757	2.70817	3.19809	3.79573	2.12388	3.81658	4.04056	3.82658	2.67019	2.67567	2.94968	3.53729	3.67719	3.41521	2.97756	4.03698	3.37522	Tumor	BRCA
TCGA-C8-A12N-01A	4.03923	2.3369	2.75489	2.26467	2.56611	3.7602	4.88679	3.62955	3.11372	2.32178	3.28335	4.07494	3.20917	2.89451	3.05861	3.50432	3.07679	Tumor	BRCA
TCGA-AO-A03U-01B	2.98673	2.15906	2.38113	2.32897	2.43988	3.12107	3.86584	3.23153	2.53749	2.21084	2.74788	3.82779	3.07005	2.59982	2.42311	3.29896	2.57183	Tumor	BRCA
TCGA-C8-A12T-01A	3.3803	2.33964	2.65723	2.28919	2.45198	3.69965	4.41638	3.47907	2.32102	1.92635	2.60974	4.04279	2.79425	3.69688	2.9275	4.08201	4.25916	Tumor	BRCA
TCGA-AO-A0J2-01A	2.96505	2.04994	3.20961	3.66339	2.91726	4.69801	3.83772	3.72286	1.89371	3.17343	3.2224	4.02382	3.02811	3.86911	3.36517	3.88917	4.26438	Tumor	BRCA
TCGA-D8-A27R-01A	4.91987	2.55258	2.94714	2.83861	2.49138	3.73057	4.66133	3.97772	2.45913	2.34329	3.05993	3.86748	3.38544	3.37733	3.60909	3.65811	3.85449	Tumor	BRCA
TCGA-A2-A0EU-01A	3.54642	2.22217	2.91651	2.33026	2.8158	3.78889	4.61901	4.08047	3.47775	2.695	3.56443	3.97671	3.04488	3.91058	3.86562	3.89021	3.70998	Tumor	BRCA
TCGA-AO-A12D-01A	4.21233	2.23161	2.32285	2.11245	2.80947	3.86052	3.8817	3.4944	2.5399	2.31752	2.88827	4.4191	3.70106	2.78632	2.83586	3.29427	3.17326	Tumor	BRCA
TCGA-D8-A1XT-01A	3.61054	2.71876	2.99936	2.82596	2.80708	4.22485	4.89542	3.9793	2.97373	3.15329	3.47029	3.86809	2.85409	3.19834	3.28069	4.11411	3.3696	Tumor	BRCA
TCGA-A2-A0CW-01A	4.7124	2.9244	2.59051	3.02422	2.30915	4.4437	4.68512	3.88826	3.48252	2.58663	3.24757	3.89469	3.16836	2.91543	3.32285	3.75518	4.05696	Tumor	BRCA
TCGA-E2-A10F-01A	3.83703	2.49581	3.02484	2.46542	2.38235	3.84067	3.8966	3.79046	3.08887	2.62695	3.30748	4.02447	3.14222	3.6342	3.20069	3.90098	3.11745	Tumor	BRCA
TCGA-BH-A0E7-01A	4.41448	2.58171	2.84583	2.2732	2.98575	3.68264	4.06906	3.93158	3.51389	2.74218	3.67426	4.3304	3.39783	4.12935	3.26295	3.85223	3.2823	Tumor	BRCA
TCGA-D8-A1XG-01A	3.55048	2.71232	2.36932	2.41813	2.95099	3.34777	4.5892	3.97073	3.67125	2.68306	3.42892	4.44749	3.38914	3.50878	3.08892	4.13599	3.15087	Tumor	BRCA
TCGA-BH-A0AY-11A	3.18618	2.65305	2.79914	2.79649	2.51651	3.43065	4.54872	3.43628	3.28674	2.23751	3.02331	3.9314	3.01633	2.9979	2.67164	3.71777	2.84191	Normal	BRCA
TCGA-E9-A1N8-01A	4.87848	2.81082	2.64975	3.25323	2.186	4.46471	5.04035	4.18852	4.65153	3.05248	4.04135	3.9057	3.76482	3.86719	3.05241	4.08808	3.59272	Tumor	BRCA
TCGA-E2-A2P5-01A	4.80551	2.26025	2.84167	2.90387	2.9855	3.39078	3.52448	3.98054	2.96635	2.26237	2.95679	4.42711	4.15545	4.29476	3.34602	4.33485	2.53174	Tumor	BRCA
TCGA-BH-A18P-11A	3.30106	2.48361	2.41996	2.73472	2.31956	3.33604	4.33867	3.26919	3.23014	2.1167	3.23336	3.78615	2.87783	2.33932	2.4338	3.38369	2.51847	Normal	BRCA
TCGA-C8-A278-01A	3.56178	2.4236	2.65099	2.56262	2.7871	4.88616	3.75121	3.96518	2.91061	2.94545	3.25036	4.37606	2.70809	3.33674	3.41668	3.894	3.67495	Tumor	BRCA
TCGA-A8-A08R-01A	4.48908	2.56412	3.67056	2.61086	2.80131	3.74191	4.28868	4.074	3.03685	3.00128	3.32673	4.45611	3.61616	3.58164	3.22848	2.85275	3.44464	Tumor	BRCA
TCGA-E2-A15A-01A	4.78452	2.42691	3.31433	2.68244	2.59878	4.04309	4.7925	3.80793	2.8358	2.00512	3.21652	3.88384	3.89895	3.70787	3.28669	3.65138	3.66228	Tumor	BRCA
TCGA-BH-A1FE-11B	2.63232	2.62744	2.87141	2.24356	2.60246	3.66196	5.22622	4.56341	4.07268	2.27947	4.00594	4.86765	2.75281	2.36645	3.19436	3.54695	3.32909	Normal	BRCA
TCGA-BH-A1EO-11A	2.71353	2.20527	2.31399	2.58619	2.2444	3.38727	3.9352	2.95215	2.52372	2.53729	2.44862	3.69934	2.42073	2.37877	2.34509	3.67553	2.68693	Normal	BRCA
TCGA-D8-A1JT-01A	2.74417	2.18883	2.94118	2.02953	3.57428	4.34809	3.80651	3.8832	3.0747	2.13775	3.24021	4.66844	2.47561	2.51647	3.65593	3.27955	4.04738	Tumor	BRCA
TCGA-D8-A142-01A	4.0685	2.70733	3.38411	2.89278	2.24815	3.90452	3.71657	3.52703	2.38285	2.83356	2.92902	3.56198	3.25053	3.25413	3.34863	3.05396	3.06315	Tumor	BRCA
TCGA-A2-A3Y0-01A	5.7377	2.45705	3.34931	4.34286	2.39232	4.70647	4.67105	4.00514	1.85851	3.80832	3.18115	2.94448	4.8278	3.55143	3.09363	3.60003	3.45808	Tumor	BRCA
TCGA-AQ-A0Y5-01A	3.05188	2.20254	2.56645	1.86231	2.89471	3.64722	4.58808	3.8047	2.38231	1.87875	3.39586	4.51976	2.19914	3.71293	3.28324	4.20154	2.41628	Tumor	BRCA
TCGA-A8-A07W-01A	5.45983	2.34117	3.04704	2.61652	2.80228	3.92494	4.93063	3.68921	2.61102	2.4802	3.12286	4.09795	3.67373	4.40653	3.03202	3.49582	3.69473	Tumor	BRCA
TCGA-A1-A0SM-01A	3.57507	2.51268	2.92904	2.22048	2.67845	3.57874	3.29265	3.48037	2.20099	2.19405	2.51012	4.00568	3.34575	3.16687	3.58909	3.73661	3.23555	Tumor	BRCA
TCGA-AC-A3EH-01A	4.62859	2.71124	2.45299	2.61101	2.27865	2.81229	3.4448	3.67584	2.45291	2.29929	2.65367	3.77744	3.72938	3.39822	3.02868	3.9569	3.01495	Tumor	BRCA
TCGA-MS-A51U-01A	4.56422	2.51826	2.67777	2.60128	2.30219	3.19969	4.08667	3.8646	3.27547	2.06591	3.27083	3.93887	4.14979	2.84475	2.85785	3.61603	3.19542	Tumor	BRCA
TCGA-AR-A24K-01A	3.21376	2.4922	2.94	3.37949	2.16437	3.65486	4.30896	4.24185	3.80731	2.72861	3.92872	4.70595	3.45566	3.65595	3.9539	4.04596	3.33981	Tumor	BRCA
TCGA-AC-A2BM-01A	4.13731	2.75494	3.45953	2.94211	2.51503	3.96255	4.74608	4.23415	3.11036	2.22167	3.60905	4.23939	3.27149	3.88652	3.68211	4.33226	3.61089	Tumor	BRCA
TCGA-A2-A3XY-01A	5.84067	2.92154	3.19031	2.88312	2.53074	3.97863	4.15541	3.5859	2.73986	2.55979	3.38593	3.67609	3.27022	2.81192	3.00206	3.62986	3.03258	Tumor	BRCA
TCGA-E2-A14W-01A	3.05217	2.37969	2.73893	2.79059	2.01372	3.30932	3.32672	4.54324	2.62702	2.4427	3.22629	3.87362	2.66817	2.8396	3.30758	3.42648	3.51031	Tumor	BRCA
TCGA-BH-A1F8-01A	2.21249	2.564	2.43795	2.17616	3.18437	4.42799	5.67897	4.04407	2.42141	2.16688	3.43514	4.94675	3.11924	3.59027	3.32076	3.84709	4.35801	Tumor	BRCA
TCGA-E9-A1RA-01A	4.55734	2.32855	2.47068	2.98053	2.6623	3.58988	4.16884	3.857	3.25306	2.66538	3.57101	4.17565	3.47914	3.65675	3.21956	3.97281	3.53434	Tumor	BRCA
TCGA-A8-A0A6-01A	3.15065	2.47126	2.80826	2.45759	2.56305	3.61841	4.27501	3.93371	2.84687	2.32862	3.22426	4.19875	3.11005	3.27922	3.59467	3.88183	3.29676	Tumor	BRCA
TCGA-AC-A7VC-01A	5.2491	2.0738	2.25791	3.12486	1.70642	3.84121	3.53909	3.47157	1.59818	2.05518	2.09797	3.07086	3.51687	3.21692	2.91991	2.79423	2.72314	Tumor	BRCA
TCGA-C8-A27B-01A	4.43539	2.50884	3.15784	2.90561	2.81402	4.69562	4.78576	4.24338	3.17196	2.42168	3.39734	4.16886	3.12413	2.9001	3.96614	3.83619	3.41255	Tumor	BRCA
TCGA-S3-AA15-01A	4.58176	2.81891	2.63195	3.13224	2.39652	3.93427	3.61729	3.45347	2.8448	2.54167	3.03524	3.63086	3.95254	3.45722	3.28652	3.77871	3.03596	Tumor	BRCA
TCGA-BH-A1ES-01A	4.70869	2.47256	3.13357	2.63991	3.13506	4.12671	5.06545	4.36714	3.02548	2.1339	3.53515	4.69533	4.65651	3.43877	3.54618	3.89788	3.42814	Tumor	BRCA
TCGA-E2-A1L6-01A	3.19766	2.52814	2.86016	2.46709	2.97274	3.84423	4.20524	3.94847	2.97763	2.12051	3.24957	4.28643	3.13892	3.00297	3.32417	3.70937	3.11928	Tumor	BRCA
TCGA-BH-A0DT-11A	3.94247	2.76944	2.89632	2.576	2.4575	3.50198	4.83741	4.05505	3.60452	2.41312	3.56238	4.24925	3.25608	3.03859	3.05466	3.97951	3.12673	Normal	BRCA
TCGA-E9-A1R0-01A	3.37641	2.53382	2.63552	2.62998	2.92937	3.62264	4.04999	3.6852	3.03167	2.7917	3.16224	3.96369	3.55325	3.42232	3.07715	3.97183	3.49149	Tumor	BRCA
TCGA-BH-A0B6-01A	4.00628	2.45631	2.60232	2.56504	2.25689	3.3374	3.95733	3.54352	2.58155	2.88778	2.3692	3.4472	3.29794	3.34775	2.5752	3.83895	3.23141	Tumor	BRCA
TCGA-B6-A0RN-01A	3.51875	2.40637	2.86212	2.73465	2.69665	3.75271	3.84566	3.97334	2.7342	2.78004	3.13581	3.99007	2.95165	2.97951	3.00875	3.76337	3.44724	Tumor	BRCA
TCGA-A8-A09W-01A	3.04399	1.95	2.72227	1.92218	3.15027	4.2945	4.10184	3.6213	3.0065	2.76202	2.93103	4.15586	2.87454	3.84118	3.18159	4.0891	3.83252	Tumor	BRCA
TCGA-EW-A1P3-01A	4.35384	2.43525	2.85845	3.02911	3.07797	3.86139	3.53246	3.67966	2.78758	1.94282	3.15454	4.30943	3.38643	3.85811	3.23097	3.59478	2.93286	Tumor	BRCA
TCGA-A7-A13F-11A	3.41715	2.41619	2.49899	2.76748	2.09716	3.38236	4.04061	3.35505	2.71828	2.19116	2.9539	3.77033	2.83492	2.46913	2.56318	3.42113	2.78389	Normal	BRCA
TCGA-A2-A0T6-01A	3.59266	2.46934	3.06566	2.38705	2.84585	3.54131	4.07032	3.91397	3.28566	2.16596	3.02396	4.12505	3.51421	3.00552	3.02342	4.0028	2.99353	Tumor	BRCA
TCGA-A7-A5ZW-01A	3.75983	2.51085	2.79233	2.67221	2.32727	3.68979	4.1486	3.93755	2.94122	2.9878	3.03662	4.05803	2.84214	2.93271	3.27559	3.93045	3.32761	Tumor	BRCA
TCGA-BH-A203-01A	2.2081	2.68467	2.84457	2.26835	2.92956	3.93731	4.40238	3.94779	2.96703	1.94663	2.96838	4.71503	3.37572	3.50638	2.97425	3.97421	3.03036	Tumor	BRCA
TCGA-DS-A7WI-01A	4.75794	2.63693	2.45899	3.59489	2.15595	3.88632	3.7394	3.25549	2.15091	2.39054	2.08114	3.55477	4.283	3.28023	2.96614	2.55792	2.88821	Tumor	CESC
TCGA-EX-A449-01A	5.19363	2.51951	2.69118	3.26796	2.71289	3.64958	4.25474	3.86531	2.49834	2.67426	2.83574	4.0737	3.95718	4.34176	3.31974	3.88895	3.07252	Tumor	CESC
TCGA-VS-A958-01A	4.34505	2.43387	2.17723	3.39198	2.78828	3.58572	4.32165	3.73803	2.77585	2.68466	3.05511	4.26015	4.09248	3.46126	2.99636	3.39243	2.97105	Tumor	CESC
TCGA-MY-A5BE-01A	4.17054	2.78304	2.74186	3.46069	2.50959	4.08145	3.74102	4.11796	2.47216	2.76587	2.60055	3.65006	4.22132	3.76125	3.82932	3.62874	3.11765	Tumor	CESC
TCGA-C5-A905-01A	4.46827	2.77285	3.13544	3.48397	2.80216	4.31944	4.68399	3.91453	2.69145	3.25757	2.88898	4.04304	3.5874	4.26324	3.50996	3.61971	3.24551	Tumor	CESC
TCGA-Q1-A73Q-01A	4.87953	2.9289	3.19437	3.66481	2.60845	4.35917	5.25683	4.45924	2.59792	2.13395	3.58196	4.37312	3.36951	3.59015	3.47581	4.22778	3.28198	Tumor	CESC
TCGA-BI-A0VR-01A	4.39997	2.61243	3.17969	3.35328	2.83191	3.82126	4.66078	3.90577	2.27821	2.60229	3.1528	4.01577	3.84556	4.64119	3.15318	3.39238	2.81173	Tumor	CESC
TCGA-EK-A2PK-01A	4.62484	2.66223	2.34604	2.71405	2.40765	4.11216	4.02359	3.72778	2.57871	2.88916	3.09756	3.68892	4.85738	3.09883	3.01427	3.6537	3.20999	Tumor	CESC
TCGA-FU-A3WB-01A	4.64138	2.90936	3.74891	3.463	3.1194	4.45345	5.64019	4.57535	2.28245	2.71219	3.32285	4.35312	3.77431	4.28242	3.70783	4.36351	3.30101	Tumor	CESC
TCGA-MA-AA41-01A	4.40636	2.71738	2.97005	3.92763	2.5274	4.0658	4.60683	4.13753	2.51929	2.62369	3.19735	3.71034	3.72871	2.96983	3.81616	3.03976	3.32841	Tumor	CESC
TCGA-IR-A3LK-01A	4.76742	2.33236	3.41668	3.28662	2.66937	4.12183	3.94361	4.01139	2.2184	2.66239	2.934	3.80205	3.9974	3.70045	2.86383	3.00166	2.69248	Tumor	CESC
TCGA-VS-A952-01A	4.28576	2.96739	2.90873	3.47957	3.00602	4.29731	3.87716	4.22041	4.12495	2.81968	3.3897	4.4302	4.3158	3.35296	3.63759	4.0407	3.22813	Tumor	CESC
TCGA-C5-A8YT-01A	4.58645	2.63784	2.94069	3.2059	2.84601	4.06015	5.08056	4.24768	2.91658	2.78613	3.15937	4.4309	3.716	3.70476	3.31809	4.17464	3.29656	Tumor	CESC
TCGA-EA-A5ZD-01A	3.83546	2.70741	2.77975	3.27888	2.85486	4.36583	4.55867	3.70045	2.41556	2.97259	2.86391	4.07892	3.80458	4.51734	3.63337	3.47931	3.14746	Tumor	CESC
TCGA-C5-A1MI-01A	5.11624	3.19277	3.32331	2.91415	3.65572	4.48197	5.34565	4.28473	2.97311	2.51739	3.66305	4.68162	4.76714	3.86576	3.58839	3.66301	4.25199	Tumor	CESC
TCGA-EK-A2RO-01A	3.97965	2.54958	2.83506	3.0635	2.24721	3.45605	4.05878	3.40851	1.07563	2.5514	2.37243	3.73669	3.32213	3.26362	2.62897	2.89591	2.62867	Tumor	CESC
TCGA-FU-A3YQ-01A	4.36492	2.43791	3.13317	2.83946	2.93114	4.00587	4.50799	3.7016	2.74262	2.52099	3.01599	4.00471	3.57151	3.90339	3.55013	3.60099	2.76468	Tumor	CESC
TCGA-C5-A7CL-01A	3.7243	2.83856	2.38062	2.15899	2.71019	3.71643	4.59958	3.81702	3.00584	2.66381	3.45448	4.11905	3.56312	3.9755	3.28472	3.86053	3.05483	Tumor	CESC
TCGA-VS-A9UB-01A	4.18709	2.89771	2.70108	3.14848	2.72235	3.9181	4.52626	3.8695	2.87249	2.70771	3.07392	3.73238	3.59739	3.58676	3.35312	3.74394	2.85975	Tumor	CESC
TCGA-C5-A1BM-01A	3.79578	2.53737	3.00836	2.60336	2.88797	3.86826	4.25072	3.6568	2.51842	2.87118	3.0683	4.00896	3.19073	3.66892	3.30476	2.77475	2.67115	Tumor	CESC
TCGA-C5-A2LY-01A	3.91877	2.57513	2.48883	3.59135	2.29684	3.95473	3.79262	3.52599	2.13498	2.98589	2.20372	3.32776	4.04993	3.95283	3.47071	3.30183	3.24542	Tumor	CESC
TCGA-EA-A50E-01A	4.37412	2.48348	2.7337	2.80091	2.79242	4.0888	4.22773	3.70334	2.53866	2.61935	2.69903	4.12089	3.48588	3.8471	2.90462	3.27182	2.86071	Tumor	CESC
TCGA-ZJ-AAXU-01A	4.07846	2.60751	2.77256	3.48454	2.67618	4.2694	4.30909	3.57962	1.86339	2.9617	2.5952	3.91746	3.87675	3.64842	2.96377	3.3963	3.74345	Tumor	CESC
TCGA-HM-A6W2-01A	4.96686	2.88366	2.87485	3.79087	2.65548	4.37865	4.31651	4.03604	2.90743	2.81864	2.3959	4.10816	4.00327	3.37247	4.39255	4.73196	3.45705	Tumor	CESC
TCGA-C5-A1MQ-01A	4.35622	2.4803	2.14516	3.67125	2.08276	3.98957	3.47577	2.82563	1.49624	2.56596	2.38212	3.1147	4.39906	2.96479	2.84312	2.57789	3.08428	Tumor	CESC
TCGA-C5-A1BE-01B	4.29559	2.79845	3.47202	3.2178	2.85442	4.1521	5.01378	4.08749	2.06315	2.61356	3.13024	4.12102	3.60397	3.68402	3.41808	4.18429	3.07435	Tumor	CESC
TCGA-C5-A1MN-01A	3.93022	2.35239	3.06746	2.67595	2.8997	3.89028	4.4688	3.51414	2.47819	3.1776	3.0896	3.89315	3.26056	4.39772	3.36335	3.42748	3.17669	Tumor	CESC
TCGA-VS-A9U7-01A	3.99412	2.60346	2.85729	3.42558	2.0201	4.20029	4.18335	3.50009	1.97398	3.15013	2.49836	3.01488	3.25212	3.84531	3.20557	3.58407	3.34625	Tumor	CESC
TCGA-ZJ-AB0I-01A	4.47654	2.67262	2.65177	2.90378	1.59006	4.07149	3.79178	3.53898	2.48342	2.84346	2.72967	2.71466	3.71801	4.56326	2.72929	3.68937	2.78339	Tumor	CESC
TCGA-LP-A4AX-01A	4.99168	3.35326	2.91053	3.15739	2.75554	4.28651	4.50678	3.82691	2.66829	2.72221	3.55687	3.91139	4.0701	4.01247	3.18622	3.73502	3.57846	Tumor	CESC
TCGA-JW-A5VH-01A	4.7617	3.00495	2.91878	3.81188	3.19257	4.57855	5.03286	4.45903	2.97872	2.89838	3.50527	4.35399	3.92713	3.72839	3.52548	4.60631	3.73717	Tumor	CESC
TCGA-C5-A902-01A	5.7461	3.09208	2.92727	2.31047	2.33871	3.37118	3.75958	3.90703	2.05696	2.89109	2.89784	4.06859	4.29917	3.83144	2.8637	1.49821	3.78578	Tumor	CESC
TCGA-FU-A23L-01A	4.72725	2.83238	3.42548	3.59417	2.2632	4.07835	4.52509	4.09355	2.68543	2.80844	3.26621	3.88266	4.00412	4.18423	3.089	4.18057	3.43862	Tumor	CESC
TCGA-FU-A3NI-01A	4.7364	3.26371	2.8231	3.20842	3.86083	4.01266	4.81313	4.05996	2.39281	2.52717	3.73676	5.15361	3.25534	4.59038	3.35651	3.85334	3.55882	Tumor	CESC
TCGA-VS-A9UT-01A	4.49543	2.9338	2.61906	3.35952	2.74002	3.97041	4.60959	4.08181	2.86105	2.89723	3.67749	4.29773	4.6361	3.57383	2.80209	4.26857	3.43106	Tumor	CESC
TCGA-C5-A8YR-01A	4.46153	2.74708	2.28748	2.88328	2.34398	4.7558	4.3096	3.59962	2.0377	2.0165	2.72808	3.30222	4.33946	4.88466	2.80122	2.97956	2.91381	Tumor	CESC
TCGA-VS-A94X-01A	3.72217	2.74353	2.90123	3.17055	2.85214	4.73509	4.44879	4.05888	2.23404	2.57752	3.13549	4.01842	4.35903	4.98799	3.32791	3.48068	3.6953	Tumor	CESC
TCGA-VS-A8EK-01A	5.28488	2.75749	2.85573	3.69218	2.79751	4.04044	4.74113	3.80467	3.09242	3.14487	3.19039	4.05582	3.80331	3.93319	3.05207	3.22627	3.28591	Tumor	CESC
TCGA-FU-A3HZ-01A	4.25666	3.09193	3.29385	3.47984	3.23133	4.17011	4.20761	4.40692	2.34634	2.94685	3.12045	4.07964	3.97941	4.12977	3.98036	4.23446	3.70443	Tumor	CESC
TCGA-ZJ-AAXT-01A	5.02857	2.70993	3.03851	3.51752	3.06939	3.96673	4.54812	4.03278	2.61572	2.75426	3.10292	3.95002	4.88663	3.81981	3.56608	2.64845	3.16724	Tumor	CESC
TCGA-C5-A2LT-01A	3.52113	2.10379	2.1582	3.08056	2.4658	3.85776	3.98339	3.32538	2.28953	2.79141	2.49139	3.6068	3.67808	3.77282	2.64527	2.99649	3.1031	Tumor	CESC
TCGA-WL-A834-01A	5.66285	2.90554	2.11534	3.02836	2.62007	4.12388	4.56659	3.85569	2.63645	2.29119	2.89183	3.93216	3.70864	3.90043	3.09135	2.9296	3.0047	Tumor	CESC
TCGA-FU-A40J-01A	5.35745	2.87374	2.88083	2.71786	2.28191	3.97898	4.3573	4.07679	2.80022	2.84764	2.81345	3.73405	4.0264	3.61276	3.70888	3.61217	3.15052	Tumor	CESC
TCGA-MU-A5YI-01A	3.95529	2.80485	3.34396	3.18633	2.72469	3.9811	4.80868	3.83631	2.07507	1.41063	2.95995	4.17861	3.62504	4.30628	3.08254	3.68744	2.91691	Tumor	CESC
TCGA-MA-AA3W-01A	4.04192	2.63351	3.08569	3.04652	2.88247	3.94301	4.76223	3.85887	2.45902	2.59179	2.74908	3.94152	3.70621	4.20256	3.06933	4.10099	2.87964	Tumor	CESC
TCGA-EK-A2PG-01A	5.0426	2.09457	2.54669	4.31665	2.19252	4.36814	3.28705	3.24817	2.24763	2.3827	2.2902	3.77229	2.92316	3.68781	3.10226	3.42202	3.52308	Tumor	CESC
TCGA-UC-A7PG-06A	4.56504	2.67077	2.43705	3.75522	2.46506	3.56215	4.52903	3.82882	2.71837	2.36429	3.12557	3.5499	4.13679	4.52574	3.06108	3.2007	3.43812	Tumor	CESC
TCGA-EA-A5ZE-01A	4.16439	2.86058	2.98728	3.40199	2.83013	4.3387	4.63207	4.29418	2.59521	2.90689	3.20763	4.3117	3.7977	3.87193	3.59749	4.29698	3.3714	Tumor	CESC
TCGA-4J-AA1J-01A	4.10887	2.70824	3.21113	3.18422	3.05463	3.73489	5.15569	3.90768	3.23653	2.89867	3.10884	4.08113	3.5008	4.06443	3.46385	3.76564	3.30203	Tumor	CESC
TCGA-C5-A7CH-01A	4.23064	2.24856	2.32175	2.76773	3.09467	3.72625	4.59984	3.61925	2.72015	3.3276	2.90074	3.83396	3.49551	4.12802	2.75074	2.91337	2.88639	Tumor	CESC
TCGA-C5-A8XH-01A	4.68557	2.77002	2.62786	3.87492	2.91294	4.20621	3.73876	3.79132	2.07317	2.71094	2.71263	4.12169	3.82667	4.08559	3.57169	3.68158	2.76104	Tumor	CESC
TCGA-JW-A69B-01A	4.44172	2.58858	3.236	3.4677	2.53927	3.67924	4.4541	3.66481	2.74424	2.81436	2.96119	4.45417	3.41871	4.17052	3.12336	3.88088	3.18687	Tumor	CESC
TCGA-ZX-AA5X-01A	4.16502	2.60843	2.69441	3.07833	2.49497	3.79606	4.02462	3.56057	2.43248	2.82847	2.98231	3.74999	3.65181	3.55107	2.76976	3.09177	2.90174	Tumor	CESC
TCGA-VS-A9V0-01A	3.36222	2.93723	2.30605	3.45094	2.98909	4.5158	3.93718	4.08148	2.64101	2.8425	3.38939	4.45563	2.78775	4.42598	2.51978	3.23446	3.17585	Tumor	CESC
TCGA-EA-A97N-01A	4.42897	2.59058	2.80104	2.72989	3.39509	3.36202	5.28508	4.08547	3.07151	2.38444	3.68461	4.57661	3.79599	4.41278	3.25799	3.90694	3.25575	Tumor	CESC
TCGA-Q1-A73S-01A	5.78406	3.34041	2.45396	3.83258	2.70323	5.12798	3.71677	3.5649	2.19505	2.65301	2.79021	3.94158	3.65601	4.40401	3.0731	3.44277	3.96649	Tumor	CESC
TCGA-ZJ-AAXA-01A	5.22502	2.66615	2.23268	2.86991	3.01186	3.61843	4.85721	3.94499	2.75943	2.57526	3.43399	4.26776	3.74867	4.93584	3.06888	3.47944	3.87625	Tumor	CESC
TCGA-DS-A0VL-01A	4.36318	2.78248	3.33172	3.11832	2.62121	3.93281	4.61621	4.04914	2.89444	3.22794	3.13778	4.04854	3.58975	3.91129	3.63294	4.06179	3.2494	Tumor	CESC
TCGA-C5-A1BN-01B	4.4591	2.72063	2.71968	2.61816	3.19165	4.21403	4.76748	3.74736	2.7671	2.97496	3.11141	4.18377	3.72424	4.56045	5.18777	3.91713	3.05873	Tumor	CESC
TCGA-EK-A2IR-01A	4.08887	3.02535	3.68573	3.99349	2.68298	3.81162	4.03137	4.42333	2.75312	2.86244	3.20525	4.38617	3.76174	4.66723	4.484	4.8008	2.49578	Tumor	CESC
TCGA-C5-A2M1-01A	4.33431	2.74156	3.10156	3.36985	2.47922	4.14946	3.86822	4.31778	2.49792	3.0486	3.1496	3.58985	3.7927	3.68403	3.55378	4.01257	3.4814	Tumor	CESC
TCGA-C5-A7CJ-01A	4.02915	2.78931	3.20649	2.85349	3.00467	3.66368	4.60541	4.02292	2.92286	2.5224	3.31535	4.27341	3.14096	3.1768	3.53834	3.58873	2.73987	Tumor	CESC
TCGA-EA-A1QT-01A	4.79107	2.98182	3.57299	3.95865	2.82854	4.14565	3.78195	4.13098	2.65566	3.34489	3.75759	4.0206	3.43233	4.59891	4.04532	4.21262	4.14374	Tumor	CESC
TCGA-VS-A957-01A	4.62386	3.08528	2.90627	3.1819	3.00785	4.20121	4.90159	4.20692	2.94161	2.928	3.27474	4.52361	3.37956	4.0214	3.54033	3.67128	3.5608	Tumor	CESC
TCGA-JW-A5VK-01A	4.04933	2.64328	2.13976	4.44274	2.13864	4.47948	3.60097	3.12611	1.34438	2.91618	2.42155	3.46629	3.21283	4.22814	2.82075	2.55625	3.63132	Tumor	CESC
TCGA-EK-A2R7-01A	4.13014	2.79043	2.50811	3.45681	3.19181	4.1234	4.8003	4.11622	2.80404	2.37605	3.44953	4.08711	4.19995	3.71894	3.62892	3.55801	3.95135	Tumor	CESC
TCGA-EA-A4BA-01A	5.68049	2.73768	2.3628	3.05967	2.60872	4.63645	4.06393	3.99527	2.34994	2.27269	2.68338	3.90251	3.97027	2.82119	3.91939	3.60094	2.99875	Tumor	CESC
TCGA-EA-A411-01A	4.46784	2.68256	3.20011	3.11578	2.73958	4.53738	4.93133	3.98829	2.62081	2.54275	3.30254	4.12505	3.97574	3.96205	3.04942	3.80764	3.2788	Tumor	CESC
TCGA-HM-A6W2-06A	4.13945	3.14107	2.77887	3.42159	3.0781	5.59101	5.12408	4.62565	2.87145	3.37607	3.53054	4.85243	3.48234	4.38102	3.46185	4.79225	2.76262	Tumor	CESC
TCGA-C5-A7UE-01A	4.412	2.71049	2.59568	3.50526	2.2763	3.74855	4.29134	3.59094	2.77314	3.10742	2.86837	3.63581	3.80159	3.3858	3.04081	3.40122	2.98169	Tumor	CESC
TCGA-JW-A5VI-01A	5.08232	2.88188	3.38731	3.35984	2.75911	4.20371	4.60685	3.77807	3.23818	3.16148	3.40638	4.2198	3.21567	4.5522	2.81314	3.63789	3.21653	Tumor	CESC
TCGA-VS-A9UD-01A	3.7998	3.03024	2.77974	4.35268	2.56492	4.20199	3.76345	3.5154	1.41856	2.61462	2.65004	3.95178	4.33205	4.44104	3.09863	3.19258	3.60436	Tumor	CESC
TCGA-DS-A0VN-01A	3.98092	2.46538	3.14362	2.93618	2.53641	3.56871	4.5351	3.65063	2.14428	2.59717	3.04784	4.02499	3.40288	4.31689	2.68866	3.27995	2.77808	Tumor	CESC
TCGA-HM-A3JK-01A	4.40957	2.64393	2.83045	3.23492	2.18731	3.62024	4.03592	3.45498	2.04483	2.24691	2.37659	3.46335	4.33385	3.56173	3.26147	3.02538	3.25373	Tumor	CESC
TCGA-LP-A5U3-01A	4.6344	2.48907	3.04315	3.08129	3.47463	4.41914	4.70249	3.93054	2.19553	2.64331	2.61438	4.72362	3.3752	3.99738	3.20153	3.63075	3.35057	Tumor	CESC
TCGA-DG-A2KH-01A	3.97963	2.22722	3.20364	3.4003	2.57224	4.45934	4.5536	4.04398	2.55843	2.8182	2.93696	4.04634	3.68274	3.85644	3.89995	4.07904	3.58348	Tumor	CESC
TCGA-C5-A2LS-01A	3.78378	2.73721	2.80514	2.979	2.69005	3.92038	3.54276	3.88019	2.5256	2.54761	3.44051	3.95476	3.25151	4.43016	3.72712	2.81925	3.07007	Tumor	CESC
TCGA-IR-A3LH-01A	3.94117	2.49061	3.52804	3.01066	2.33131	3.78377	4.63301	3.81558	2.5636	2.67394	2.96815	3.76441	3.583	3.31518	3.07495	3.77809	3.46615	Tumor	CESC
TCGA-Q1-A5R3-01A	3.86077	2.10042	1.77804	3.76534	1.47117	4.85176	2.63586	2.33712	0.960143	2.17711	1.5361	2.0024	4.78359	2.70456	1.82751	2.02206	3.10982	Tumor	CESC
TCGA-MA-AA3X-01A	4.14048	2.66558	2.35717	3.24791	3.05656	4.03407	4.79315	3.35446	2.32543	2.7364	2.89488	4.58119	3.45144	4.30898	2.32649	3.22798	3.20708	Tumor	CESC
TCGA-VS-A954-01A	4.92382	2.60181	2.62753	3.4035	2.65193	3.42471	4.24915	4.01443	1.94539	2.58369	3.00386	4.07305	4.32489	3.45422	3.29725	3.35357	3.72235	Tumor	CESC
TCGA-EA-A3HS-01A	4.27711	2.73739	3.23991	3.40459	2.67978	3.49621	4.70853	3.95776	2.85494	3.00819	3.49116	4.30548	3.87648	3.49135	2.94033	3.68929	3.54195	Tumor	CESC
TCGA-EA-A3HR-01A	3.31943	2.6579	3.25217	2.90346	2.92836	4.03953	3.93134	3.892	2.50419	3.04375	2.97587	3.79719	2.78441	3.76938	2.91701	3.56685	3.65356	Tumor	CESC
TCGA-ZJ-AB0H-01A	4.20843	2.35706	3.10333	3.9059	2.20312	4.34882	4.08855	3.77572	2.70737	2.66281	2.88491	3.37091	3.74758	3.37925	2.74643	4.05274	2.8826	Tumor	CESC
TCGA-JX-A3Q0-01A	3.84124	2.48506	2.74896	2.87792	2.52016	3.81815	4.67212	3.61584	2.14841	2.51805	2.91324	3.66201	3.82221	4.31313	3.38191	3.37824	3.18348	Tumor	CESC
TCGA-DS-A3LQ-01A	3.62531	2.29152	3.26406	3.78817	2.49648	4.18593	4.15116	4.07849	2.28115	2.37587	3.04069	3.72969	3.70805	5.07214	3.0226	3.79097	2.93854	Tumor	CESC
TCGA-EK-A2R8-01A	3.59147	2.39649	2.79654	3.28018	2.91465	3.76093	4.9944	3.91494	2.14389	2.71957	3.22158	3.51181	3.31636	4.17312	3.39793	3.5058	3.1848	Tumor	CESC
TCGA-FU-A3TX-01A	3.45538	3.09605	3.11411	2.35236	2.66605	4.07812	3.4595	5.0326	2.25437	2.77385	3.73619	4.07589	4.30754	4.44256	3.78072	3.21768	3.25539	Tumor	CESC
TCGA-EA-A556-01A	5.46466	2.92564	3.59714	3.3135	3.0553	4.48312	4.75339	4.20894	2.66944	2.73894	3.09514	5.52787	3.65624	3.47097	3.37031	3.85958	3.42801	Tumor	CESC
TCGA-VS-A9UO-01A	4.61948	2.67202	2.08226	2.3237	2.65229	2.57676	3.28984	3.7016	2.85211	3.00543	3.45943	4.38235	4.07261	3.86229	3.10344	3.74145	4.00059	Tumor	CESC
TCGA-EX-A3L1-01A	3.36756	2.41766	1.98604	2.69453	2.84356	3.82427	4.76385	3.13164	2.037	2.52505	2.25715	3.82163	3.57341	3.74951	2.84639	2.96233	2.96177	Tumor	CESC
TCGA-C5-A7CM-01A	4.30819	2.40801	2.09933	3.31638	2.08601	3.80919	3.23487	3.55021	1.88516	2.55584	2.94088	3.32232	3.02878	4.05915	3.24701	1.03984	3.65032	Tumor	CESC
TCGA-ZJ-AAXF-01A	4.30736	2.49096	2.77519	3.33901	2.63203	3.67617	4.62543	3.77972	2.67498	2.78539	3.12658	3.57319	3.81093	3.86396	2.96832	3.11948	3.40792	Tumor	CESC
TCGA-2W-A8YY-01A	4.44432	3.15168	3.08964	3.3468	2.85817	4.30599	4.57816	3.84551	2.58121	2.7593	3.02239	4.45035	4.04968	4.13241	3.67238	3.50088	3.56523	Tumor	CESC
TCGA-VS-A9UR-01A	4.65528	2.6887	3.00541	3.25232	3.01808	4.0645	3.75514	3.61763	2.70106	2.85319	3.31133	3.77161	3.92314	3.82807	3.19142	2.86419	3.49525	Tumor	CESC
TCGA-C5-A7X3-01A	4.36235	2.6408	2.37398	3.79356	2.66817	4.45801	4.4584	3.31655	1.93492	3.20425	2.70158	3.7011	4.49211	4.07931	2.99745	3.66877	3.50419	Tumor	CESC
TCGA-HM-A4S6-01A	4.83384	2.67934	2.87966	3.1816	2.84255	3.83108	4.52397	4.02194	2.69605	2.86672	3.09159	3.98153	3.95252	4.16911	3.03689	3.78588	2.92388	Tumor	CESC
TCGA-FU-A770-01A	4.65789	2.74408	2.83725	3.19912	2.6522	4.16473	3.84369	3.32076	2.59056	2.75604	2.37792	3.87287	3.65943	3.71856	3.34883	3.45513	3.15497	Tumor	CESC
TCGA-VS-A9UC-01A	5.33642	2.25088	2.59769	3.27381	2.4269	4.32131	4.0473	3.67527	2.79949	2.82256	2.93093	3.38967	3.64879	3.41311	2.60366	3.85523	2.93062	Tumor	CESC
TCGA-DS-A1OC-01A	4.28119	2.70475	3.78995	3.38242	3.04525	3.82676	4.8178	4.05248	2.56869	2.93831	3.94817	4.33434	2.95512	3.95464	3.1584	3.38488	3.53119	Tumor	CESC
TCGA-EX-A69M-01A	4.56654	2.59865	3.10078	3.00843	2.82331	3.74858	4.65993	4.04345	2.04942	2.40502	3.13671	4.50855	3.99269	3.77593	3.48284	3.85954	2.91735	Tumor	CESC
TCGA-C5-A1MK-01A	4.53378	2.60171	2.92657	3.03951	2.52829	3.5799	4.24794	3.71361	2.47818	2.57915	3.37036	3.99026	3.57123	3.7422	3.20983	3.15866	3.35967	Tumor	CESC
TCGA-JW-A5VJ-01A	5.13581	2.64927	2.62336	3.67735	3.53066	4.5762	4.7764	3.6999	2.95005	2.77416	3.19937	4.34729	3.71315	3.40138	2.72354	3.20191	3.08367	Tumor	CESC
TCGA-EX-A1H6-01B	4.49966	2.35418	2.39138	2.79174	1.98342	4.30044	3.04422	3.22622	2.52875	2.08075	2.75852	3.42896	3.68307	3.01109	3.50487	3.55076	2.75443	Tumor	CESC
TCGA-EA-A3Y4-01A	4.73014	2.25477	2.2347	2.67526	1.53841	3.77998	3.27332	3.08605	1.99517	1.78158	2.16684	2.65512	4.14155	2.91642	2.9588	2.71617	2.48778	Tumor	CESC
TCGA-JW-A5VL-01A	4.96833	2.91694	2.95184	3.40659	2.76797	3.89125	4.40233	3.59484	2.47995	3.28329	2.6652	4.08058	4.55	3.85924	3.40214	2.92303	2.86592	Tumor	CESC
TCGA-EA-A1QS-01A	3.61863	2.22574	2.93833	2.25816	2.60129	3.2304	4.16146	3.63998	2.40932	2.47461	3.00655	3.98327	3.58198	3.7716	2.90255	3.40226	3.4311	Tumor	CESC
TCGA-EK-A2PM-01A	4.04761	3.00183	2.61202	3.88037	2.33324	4.45479	4.02779	3.69244	2.12479	2.68573	3.5494	3.97363	3.32333	4.23275	3.31687	3.54086	3.41191	Tumor	CESC
TCGA-JX-A3PZ-01A	4.11331	2.39026	2.65868	3.7687	2.50464	4.13264	4.26016	3.68955	1.62627	2.73103	2.30049	3.6498	3.91766	3.99132	3.10055	3.20271	3.31686	Tumor	CESC
TCGA-DG-A2KK-01A	4.35702	2.57797	2.84249	3.13854	2.69653	4.27327	4.79232	3.68576	1.82232	2.53455	2.8295	3.91251	3.93691	3.61701	3.50714	3.80033	3.89076	Tumor	CESC
TCGA-VS-A8QM-01A	4.00249	2.66931	2.56421	3.15289	2.58245	3.46529	4.65342	3.64016	2.92379	2.79842	3.0254	3.9497	3.59773	4.38382	2.8104	3.84226	3.42874	Tumor	CESC
TCGA-C5-A7CO-01A	4.22262	2.55641	2.08799	3.76549	2.21876	3.6127	3.84489	3.74697	2.83581	2.36907	2.78507	3.71782	3.60524	3.7218	3.41805	2.83386	3.05251	Tumor	CESC
TCGA-VS-A9UH-01A	4.43912	2.46548	3.09161	3.33475	2.19104	3.44825	4.03878	3.34409	2.02074	2.91025	2.61812	3.73369	3.5124	4.06843	3.11813	2.70564	3.19145	Tumor	CESC
TCGA-EA-A439-01A	4.4327	2.92339	3.06324	2.78692	2.85533	3.55015	5.5732	4.36828	2.61502	2.46652	3.53793	4.62031	4.25785	3.75365	3.16454	3.75867	4.00941	Tumor	CESC
TCGA-EK-A3GJ-01A	4.21808	2.82531	3.64111	4.11738	2.81661	4.72038	4.40541	3.87884	2.20168	2.60025	3.38463	3.7222	3.58396	3.71395	3.42982	3.39491	3.18982	Tumor	CESC
TCGA-EA-A3HQ-01A	4.18158	2.63132	3.25301	3.25417	2.09453	3.7942	5.42617	4.41657	2.69529	2.93258	3.66345	3.44258	3.26234	4.2076	2.97248	3.78215	3.64215	Tumor	CESC
TCGA-EA-A6QX-01A	4.44752	2.624	3.09007	3.60218	3.1633	4.38384	4.79955	3.73661	2.55859	3.11841	2.79917	4.15004	3.55831	3.78873	3.28712	4.01867	3.98	Tumor	CESC
TCGA-C5-A7UI-01A	4.15914	2.36954	2.39225	4.56998	2.30413	4.22023	3.54928	3.02522	1.78585	2.4118	2.18568	3.12337	4.58157	2.7815	2.7942	2.84109	2.84141	Tumor	CESC
TCGA-ZJ-AAXD-01A	4.52032	2.59163	2.4211	3.04555	2.95925	3.4449	5.3987	3.85921	2.77051	2.39764	3.64375	4.26765	3.47378	4.08282	2.72926	3.74112	3.23814	Tumor	CESC
TCGA-LP-A4AV-01A	4.18008	2.27232	1.31847	3.76128	1.74905	4.17396	2.76716	2.29169	0.960605	2.14484	1.51454	2.44381	4.20928	3.47388	1.86096	2.04059	3.47419	Tumor	CESC
TCGA-VS-A950-01A	4.27223	2.63213	3.31004	3.04857	3.14778	4.10921	5.09139	3.59163	2.2197	2.571	2.9154	4.32433	3.75187	3.98392	2.58426	3.39008	3.87726	Tumor	CESC
TCGA-C5-A3HD-01B	3.71307	2.73794	3.40184	3.4225	3.04196	4.10131	5.01659	4.18151	2.77052	3.13813	3.42383	4.05789	3.96689	4.31202	3.36333	4.69038	3.94937	Tumor	CESC
TCGA-DS-A5RQ-01A	3.88984	2.48532	2.71433	2.73762	2.58181	3.70182	3.58822	3.37285	1.46202	2.40767	2.31596	3.95772	3.37889	4.50034	2.65475	3.1177	2.6382	Tumor	CESC
TCGA-VS-A9UP-01A	4.39692	3.41406	3.32811	3.12623	2.92169	4.25881	5.02026	5.13338	3.05212	2.89375	3.82291	4.32836	4.32349	4.2724	3.30515	3.69464	4.03437	Tumor	CESC
TCGA-C5-A7CG-01A	4.78829	2.6722	3.1937	3.25318	2.79962	3.80925	4.84013	4.23024	2.67342	1.86718	3.06633	4.38043	3.97017	4.11371	3.21963	3.8902	3.33427	Tumor	CESC
TCGA-MY-A5BD-01A	4.43594	2.66031	3.20679	2.99842	2.11832	4.31617	4.82534	4.3206	1.25727	2.36259	2.27988	3.6169	3.14588	3.38172	3.02309	3.61447	3.13169	Tumor	CESC
TCGA-C5-A1M6-01A	4.75119	2.77099	2.9388	3.13828	3.20113	5.03163	5.41128	4.0367	2.1823	2.7697	3.67601	4.68275	4.34804	4.96034	4.1666	0.629315	3.83826	Tumor	CESC
TCGA-VS-A8QF-01A	4.21963	2.79633	2.81498	3.547	2.56366	4.4443	4.14234	3.67264	2.81375	3.0342	2.61449	3.7808	3.40416	4.78812	2.80708	1.13402	3.42154	Tumor	CESC
TCGA-EK-A2RE-01A	3.54911	2.51471	2.98005	1.73484	2.8986	3.88994	4.24739	3.41013	2.16548	2.39633	2.93405	3.96897	3.07406	4.2588	3.05766	3.38819	2.7294	Tumor	CESC
TCGA-UC-A7PG-01A	3.98504	2.38829	2.46754	3.06311	2.40296	3.37277	4.22409	3.59746	2.88958	2.58379	3.1812	3.44273	3.7386	3.89405	2.46357	2.89003	2.94543	Tumor	CESC
TCGA-VS-AA62-01A	4.27886	2.52156	2.62362	2.86273	2.73833	3.90543	4.38291	3.49321	3.02122	2.70691	2.8437	3.97417	3.50058	3.53179	3.23615	3.66546	2.93542	Tumor	CESC
TCGA-C5-A2M2-01A	4.76942	2.78753	3.31323	2.92655	2.70856	5.04725	4.76498	4.06162	2.42086	2.97845	3.44782	4.40582	3.79821	3.96138	3.14249	4.50271	3.53845	Tumor	CESC
TCGA-MA-AA3Y-01A	4.28461	2.67419	3.22166	2.84065	3.1055	4.04071	4.60056	3.71685	2.02934	2.76066	2.85873	4.25935	3.2536	4.16907	3.42499	3.32991	2.81022	Tumor	CESC
TCGA-MY-A913-01A	5.00453	2.63359	2.9773	3.00988	3.23713	4.19042	4.18394	3.60576	2.63107	3.4774	2.75357	4.23132	4.08451	4.62322	3.47335	3.37685	3.47533	Tumor	CESC
TCGA-C5-A7CK-01A	3.95337	2.92423	2.38452	3.2671	2.82429	3.64353	4.91808	4.14401	3.00201	2.79437	3.30887	4.30532	4.34892	3.88004	3.45046	3.65234	2.98359	Tumor	CESC
TCGA-UC-A7PI-01A	5.0539	2.74175	3.07073	3.24592	2.76218	3.80081	4.78618	3.85784	2.81077	2.53384	2.99291	4.06431	4.10509	4.07171	3.43558	3.15554	3.74987	Tumor	CESC
TCGA-C5-A7X5-01A	4.23534	2.49049	3.55128	4.28689	2.64285	4.32688	4.35645	3.90489	2.37627	2.64056	2.30672	4.19241	3.56108	3.97887	2.9439	3.38453	3.3203	Tumor	CESC
TCGA-DG-A2KJ-01A	4.34507	2.12986	0.579623	4.345	1.79063	4.50891	3.04095	2.09249	0.995279	1.18216	2.18845	1.9463	5.82838	2.23017	2.14342	1.34207	3.44462	Tumor	CESC
TCGA-VS-A9V3-01A	4.74912	2.5096	2.97308	3.47994	2.97869	4.37091	4.79092	4.0623	2.96235	2.85343	3.21975	3.87772	4.05432	4.07331	3.14499	3.72102	3.68597	Tumor	CESC
TCGA-DS-A7WF-01A	4.37493	2.83725	3.16074	3.32691	2.84242	4.28054	5.08969	3.91607	2.58406	2.69481	2.98635	3.96957	3.93385	3.72165	3.49952	4.21256	3.1372	Tumor	CESC
TCGA-C5-A8XK-01A	4.62483	2.76945	2.82233	3.81183	2.86858	4.19321	4.50726	3.77401	2.70844	3.10453	2.78447	3.92717	4.19972	4.286	2.89099	3.67901	3.31717	Tumor	CESC
TCGA-EA-A5FO-01A	4.25095	2.59778	3.09221	3.15624	2.91841	4.27726	5.22107	4.0289	2.79551	2.48157	3.10601	4.11949	3.23796	4.63219	3.46324	4.02656	3.67063	Tumor	CESC
TCGA-VS-A9UZ-01A	5.15182	2.56644	3.0065	3.26026	2.79504	4.0856	4.4846	3.83371	2.62122	2.75423	3.11197	4.23038	3.89698	4.59777	2.89193	4.33754	3.85549	Tumor	CESC
TCGA-EK-A2IP-01A	4.73073	2.66688	2.83056	2.87232	2.90987	4.11614	3.91185	3.4534	3.06103	2.11135	2.88706	4.14969	3.64425	3.47157	3.42592	3.38273	2.62811	Tumor	CESC
TCGA-VS-A94W-01A	5.05924	2.66454	2.62142	3.27241	2.43034	3.22282	4.49267	3.89362	2.79921	2.83375	3.09284	4.07274	4.39429	4.66186	2.9535	3.48103	3.38348	Tumor	CESC
TCGA-DS-A1OB-01A	3.8504	2.34766	3.10119	4.02629	2.85001	3.72574	2.92696	4.06111	2.49926	2.65923	2.79897	4.60693	3.80811	3.84823	8.70881	3.00942	2.56458	Tumor	CESC
TCGA-EA-A410-01A	5.26667	2.91739	2.84477	3.67034	3.254	4.57854	4.29653	4.26114	2.54414	2.73744	3.46129	4.29714	4.21431	4.09576	3.33698	4.16682	3.39207	Tumor	CESC
TCGA-EX-A8YF-01A	4.24194	2.52053	2.77673	3.1945	2.46027	3.65831	3.57192	3.77228	2.64507	2.60144	3.09048	3.51572	3.97336	3.53772	3.22402	3.87689	2.94481	Tumor	CESC
TCGA-EK-A2H0-01A	4.42231	2.92235	3.06994	2.66226	3.00448	4.53604	4.30741	3.80222	3.15879	3.05287	3.52163	3.92734	3.9732	4.1757	3.64615	4.07146	3.21905	Tumor	CESC
TCGA-VS-A9UV-01A	4.60814	2.77873	3.06804	4.06129	3.1275	4.21341	4.97075	3.90022	2.51653	2.84556	3.0757	4.63678	3.75128	3.83594	3.50122	3.82256	3.26199	Tumor	CESC
TCGA-LP-A7HU-01A	5.16759	3.00811	3.04236	3.47498	1.90878	4.41587	3.94009	4.06801	2.43175	2.90497	2.69675	3.73664	4.08018	4.32297	3.70748	3.77846	3.72793	Tumor	CESC
TCGA-VS-A8EI-01A	4.51503	2.7246	2.18839	3.98431	3.22523	4.12264	4.55084	3.41418	2.92717	3.24525	2.64057	4.37948	4.4523	4.03908	3.14372	3.34693	3.99716	Tumor	CESC
TCGA-BI-A0VS-01A	5.04618	2.78988	3.16954	3.15633	3.48988	3.95013	4.40723	4.05317	2.30261	3.07057	3.03816	4.34278	3.21718	4.31726	3.05961	3.338	3.59208	Tumor	CESC
TCGA-DS-A0VM-01A	4.89036	2.44413	2.99288	3.34596	2.63811	3.85295	4.49824	3.78863	1.91006	2.70065	2.79768	3.6148	3.3623	4.18216	3.59028	3.47645	2.9846	Tumor	CESC
TCGA-IR-A3LB-01A	5.06513	2.62543	3.13666	2.74281	2.06025	3.23121	3.45776	3.72889	2.27962	2.05981	2.47188	4.28861	3.15877	4.23566	3.15487	2.66202	2.55804	Tumor	CESC
TCGA-VS-A8EC-01A	4.31976	2.75723	4.90729	4.10435	4.31803	4.41366	4.44855	4.33889	2.87839	2.75873	3.18224	5.66564	3.77085	4.34914	4.23267	3.71329	3.62245	Tumor	CESC
TCGA-VS-A9V2-01A	4.33796	2.69983	2.86973	3.40501	2.75575	4.12653	4.54344	3.89227	3.17133	3.15244	3.21068	3.97555	3.81679	3.74409	4.80066	3.84414	2.74286	Tumor	CESC
TCGA-EK-A3GN-01A	4.64109	2.69568	3.01689	3.31882	2.67547	3.62784	4.76378	4.43079	2.55404	2.79562	3.0563	3.99245	3.67744	3.8191	3.79985	3.25658	3.61381	Tumor	CESC
TCGA-IR-A3LA-01A	4.23515	2.82692	2.86212	2.80032	2.80255	4.92026	3.87172	4.27623	2.94164	1.84815	3.45418	4.67683	3.51598	3.42099	3.50291	4.012	3.9469	Tumor	CESC
TCGA-C5-A7X8-01A	4.79564	2.68529	2.20257	2.94721	2.42651	3.65864	4.26354	3.33988	2.21917	1.96934	2.84232	3.99995	3.73129	3.2454	2.78319	2.86985	3.21921	Tumor	CESC
TCGA-EK-A2RL-01A	3.89075	2.83756	3.24124	3.26486	3.41967	4.12027	4.83787	4.03561	2.78468	3.01632	3.44275	4.68203	3.76565	3.87162	3.92675	4.05448	3.39595	Tumor	CESC
TCGA-C5-A0TN-01A	3.99315	2.83813	2.61127	2.14015	2.93417	3.90561	4.41116	3.68779	2.52763	3.05273	2.8929	3.97396	3.78875	4.2832	3.7052	2.92484	2.88471	Tumor	CESC
TCGA-FU-A57G-01A	4.62991	2.4117	2.78643	2.93331	2.6577	3.8995	4.23017	3.84261	2.61961	2.70567	3.04823	4.02415	3.48883	3.33324	3.27718	3.66788	2.81373	Tumor	CESC
TCGA-EK-A2PI-01A	4.48832	2.95787	3.08824	3.50379	2.76704	4.17514	4.14598	3.94944	2.53557	2.98169	3.21939	3.88881	3.58633	3.64834	4.09523	3.99197	2.62561	Tumor	CESC
TCGA-Q1-A73P-01A	4.78611	2.61126	3.03129	2.98545	2.72426	3.78514	3.92044	3.74039	2.02203	2.61315	3.0035	4.13435	3.81148	3.59198	3.26745	3.89167	3.66217	Tumor	CESC
TCGA-C5-A1MP-01A	4.00199	2.70382	3.6371	3.30575	2.70277	3.74041	4.34982	3.75492	2.66358	2.62811	3.20824	3.83972	3.59628	3.00636	3.71441	3.72596	3.51809	Tumor	CESC
TCGA-VS-A8EL-01A	3.83867	2.18302	2.6723	3.48678	2.39587	3.62898	3.90737	3.39375	1.80518	2.26006	2.49831	3.17268	3.94914	3.46457	3.12647	3.08704	3.07286	Tumor	CESC
TCGA-C5-A1BQ-01C	3.65629	2.73	3.2032	2.97026	2.79793	3.66193	4.38786	3.78902	2.35909	2.37738	2.96472	4.01598	3.7873	3.3128	2.69172	2.70178	2.85189	Tumor	CESC
TCGA-ZJ-AAXI-01A	3.74577	2.20489	2.6628	3.28237	2.18638	3.80035	4.39345	3.25797	3.2899	3.00654	2.80181	3.95355	3.3778	3.19766	3.27378	3.40703	2.85028	Tumor	CESC
TCGA-FU-A23K-01A	5.1076	2.57963	2.33063	4.02253	2.05622	4.30902	3.8878	3.28665	1.56842	2.67667	2.48165	3.40878	3.40583	3.51171	3.33965	2.2791	3.97319	Tumor	CESC
TCGA-Q1-A6DT-01A	4.0691	2.62063	2.50435	3.50158	3.04846	3.97715	4.01086	3.67608	2.51129	2.88327	3.42769	4.5791	2.82116	3.76654	3.1077	3.31735	3.44479	Tumor	CESC
TCGA-EK-A2H1-01A	3.89168	2.60296	2.7492	2.63411	2.65137	4.54771	4.3953	3.40449	2.06256	3.18754	3.17531	3.40916	3.4428	4.50142	3.37662	3.01478	3.2076	Tumor	CESC
TCGA-C5-A1M5-01A	4.99791	2.72038	3.34688	3.09599	2.7684	3.92728	4.78034	4.05456	2.7144	2.85399	3.11603	3.95374	3.86152	4.59451	3.74662	3.89141	3.20563	Tumor	CESC
TCGA-EA-A44S-01A	4.5228	2.24343	2.84067	3.51499	2.89478	4.5225	4.58533	3.84314	3.03104	2.88393	3.0351	4.14617	3.76337	3.19911	3.27688	3.54905	3.17388	Tumor	CESC
TCGA-EA-A78R-01A	3.31409	2.48549	3.22586	3.30335	2.05503	4.41204	4.26042	3.60175	1.42402	2.5775	2.24695	3.04062	3.83516	3.99365	3.18319	3.36028	3.19639	Tumor	CESC
TCGA-C5-A7XC-01A	4.74805	2.73753	2.82636	2.96359	2.89633	4.41625	4.44986	3.73273	3.42566	2.97638	2.80489	3.96366	3.84003	3.7406	2.94838	3.7526	3.13572	Tumor	CESC
TCGA-VS-A9V4-01A	5.18066	2.66732	2.72823	3.86767	2.4558	4.17153	4.52635	3.81832	2.52136	2.80196	2.76784	4.09775	3.92652	4.59708	3.25463	2.9757	3.37601	Tumor	CESC
TCGA-EK-A2RA-01A	3.73244	2.60044	2.74708	3.24867	2.36409	4.60801	4.67492	3.94355	2.28669	2.18114	3.2215	3.8773	3.70046	4.09207	3.14921	3.68384	3.43495	Tumor	CESC
TCGA-EX-A1H5-01A	4.93634	3.23502	2.92303	2.95403	3.04288	4.39783	5.04187	4.02845	2.2399	2.38078	3.56561	4.51432	4.21656	4.504	3.35426	3.80165	3.6691	Tumor	CESC
TCGA-VS-A953-01A	5.62507	2.20551	2.44554	3.71277	2.60805	3.40714	4.00557	3.7813	2.23196	2.86399	2.17506	4.39791	4.00758	3.8965	2.56399	3.51275	2.73623	Tumor	CESC
TCGA-MA-AA3Z-01A	4.47032	2.67129	3.27134	3.09592	2.87106	5.21577	4.66141	3.77575	2.59999	3.03294	3.01366	4.09996	3.41341	3.98476	3.42156	4.02882	3.30251	Tumor	CESC
TCGA-VS-A959-01A	4.69422	2.97299	2.38539	3.2628	2.27591	4.32696	4.77638	4.0706	3.15477	2.56683	3.10907	3.85801	4.2291	3.90922	2.90289	3.35126	3.85973	Tumor	CESC
TCGA-FU-A3EO-01A	4.14685	2.37913	1.96421	3.28604	1.96896	4.23026	3.97554	2.78025	1.30909	2.22196	2.05844	3.05519	3.88772	3.73239	2.33494	2.72459	3.17415	Tumor	CESC
TCGA-BI-A20A-01A	4.2985	2.87621	2.89797	3.42648	2.44038	4.10736	3.99111	3.88151	2.58166	2.73306	2.97186	3.88706	3.84521	4.43112	3.23941	3.42727	3.09266	Tumor	CESC
TCGA-DS-A1OD-01A	5.06763	2.92994	2.84574	3.0611	2.37694	3.92575	4.71204	4.05432	2.68699	2.31787	3.29945	4.07564	4.98019	3.58944	3.70266	3.50449	3.34486	Tumor	CESC
TCGA-C5-A1M9-01A	4.27309	2.53184	3.37731	3.14524	3.19207	4.52968	4.72812	3.92292	2.19428	2.92753	2.66181	4.21954	3.70114	3.99729	3.91392	3.86775	3.25426	Tumor	CESC
TCGA-MY-A5BF-11A	3.40227	2.27326	2.3981	2.83747	1.63233	2.86692	3.85769	2.7314	2.29456	2.5263	2.69603	3.19405	2.82674	2.04669	2.21042	3.5294	2.55534	Normal	CESC
TCGA-Q1-A6DW-01A	4.12237	2.50879	3.40861	3.8718	3.10269	3.59657	5.19399	4.13108	2.27588	2.74844	3.29104	4.49125	3.20395	3.66575	2.80124	3.50376	3.42281	Tumor	CESC
TCGA-C5-A3HF-01A	4.20467	2.52619	3.04713	3.2963	2.67577	3.88825	4.43356	4.095	2.76918	3.03617	3.14094	3.91938	3.6655	3.80076	3.44481	3.89192	3.33905	Tumor	CESC
TCGA-VS-A8Q9-01A	5.0264	2.90924	2.89957	3.36992	2.53632	4.04019	4.39236	3.91346	2.1211	2.6301	3.31632	3.93516	4.89582	3.39414	3.41733	3.44089	3.26562	Tumor	CESC
TCGA-Q1-A5R2-01A	4.31291	2.34244	2.30502	3.84003	2.18682	4.38966	3.59862	3.06722	1.78791	2.64344	2.02399	3.16604	4.05659	3.80193	2.741	2.90773	3.35071	Tumor	CESC
TCGA-VS-A8Q8-01A	3.43127	2.3552	2.06915	2.48781	2.47091	3.74887	3.37423	3.36787	1.80626	2.4187	2.59047	3.63495	3.46593	3.55186	3.55784	3.31556	2.55192	Tumor	CESC
TCGA-C5-A1BJ-01A	4.04531	2.85745	3.2886	3.44925	2.7933	3.97864	4.77824	3.90371	3.18251	2.86497	3.32035	4.1042	3.57862	3.68052	3.66897	3.85476	3.34659	Tumor	CESC
TCGA-Q1-A6DV-01A	4.45886	2.84747	3.16002	3.2132	3.17402	4.41079	5.01844	4.02138	2.85335	2.63672	3.38323	4.22355	3.63544	3.77905	3.97301	3.99314	3.24906	Tumor	CESC
TCGA-EK-A3GK-01A	5.01565	3.03262	3.89606	2.42648	3.02907	4.09703	5.00332	4.01518	2.67186	3.22725	3.38205	4.43791	4.26818	4.1543	4.58422	3.71071	3.98073	Tumor	CESC
TCGA-IR-A3LF-01A	4.48343	2.79402	3.35858	3.35246	2.45869	3.86938	4.14331	4.27809	3.21428	2.47183	3.45616	4.10278	3.62362	4.09323	3.4668	4.2828	3.34862	Tumor	CESC
TCGA-C5-A1M7-01A	3.56802	2.6629	3.25031	3.04754	2.91816	3.7874	5.04914	3.89056	2.1842	2.93592	3.54182	4.39694	3.47409	4.76938	3.3109	3.48623	2.82045	Tumor	CESC
TCGA-EK-A2PL-01A	4.02245	2.592	2.80356	3.14066	2.59716	3.91513	4.27539	3.75516	2.75653	2.60157	3.39979	4.08256	3.29963	3.26208	2.88279	3.5369	3.24087	Tumor	CESC
TCGA-LP-A4AU-01A	4.40927	2.43826	2.34393	2.5911	2.53676	3.77426	3.81381	3.51809	2.13828	2.3578	2.91242	3.6572	4.09884	3.9335	3.21258	3.85139	2.8813	Tumor	CESC
TCGA-ZJ-AAXJ-01A	2.76399	2.11389	2.20958	2.27212	2.07924	4.05892	4.54993	3.20301	2.57889	2.08678	2.31591	4.02929	1.62365	3.44446	3.63621	3.4269	2.59818	Tumor	CESC
TCGA-VS-A94Z-01A	4.50454	2.99027	3.07464	3.50547	2.96082	4.12337	4.64723	4.0934	2.57192	2.42037	3.00568	4.3676	3.92557	3.85006	3.79254	4.27243	3.23927	Tumor	CESC
TCGA-EK-A2GZ-01A	2.83384	2.4538	2.98103	3.13842	2.52104	4.38049	3.91649	3.78974	1.92688	3.30576	3.42451	3.90765	3.16514	3.53341	3.01699	3.42876	3.51737	Tumor	CESC
TCGA-JW-A852-01A	4.71823	2.52436	1.91373	3.76769	2.10011	4.14942	3.16068	2.91953	1.33366	2.32963	1.84272	2.83925	4.34555	2.93519	2.91548	3.20057	3.15463	Tumor	CESC
TCGA-VS-A9V5-01A	3.99886	2.16973	3.00706	3.25397	2.60854	4.34752	3.75524	3.8469	2.83566	3.01486	3.1359	3.9345	3.14552	2.96101	2.84534	3.65454	3.13005	Tumor	CESC
TCGA-ZJ-AAXB-01A	3.65326	2.88902	2.67038	3.34653	1.71587	4.56225	4.05218	4.11084	2.30472	2.67112	2.27036	2.79401	4.24737	4.77977	3.62424	3.43932	4.2478	Tumor	CESC
TCGA-EK-A2R9-01A	4.44019	2.57799	3.07086	3.13605	1.9548	3.8293	4.20296	3.81037	1.91351	2.2049	2.85184	4.18753	3.41	3.84469	3.63083	1.81859	3.30569	Tumor	CESC
TCGA-C5-A3HE-01A	4.84037	2.48038	2.44742	3.06316	2.06717	3.06571	3.87094	3.99237	2.0361	2.68457	3.25078	3.95397	4.13602	3.88204	3.0973	3.21625	3.24816	Tumor	CESC
TCGA-ZJ-A8QR-01A	4.06544	2.6948	3.10381	3.013	2.60737	3.88918	4.34311	3.71699	3.04345	2.96797	2.44818	3.44207	3.74091	3.31862	3.46393	3.47022	3.13876	Tumor	CESC
TCGA-EK-A2RC-01A	4.31332	2.74193	3.2188	3.58956	2.85097	4.3901	4.34124	3.53132	2.52495	2.59182	2.93599	3.77914	3.91522	3.34938	3.72898	3.44989	3.15148	Tumor	CESC
TCGA-C5-A1ML-01A	4.06403	2.80016	2.69458	3.02303	2.57704	3.75393	3.96026	3.97328	2.59191	2.58737	3.17875	4.18503	3.36874	3.68292	3.30642	3.19017	3.03131	Tumor	CESC
TCGA-FU-A5XV-01A	3.77371	2.59534	2.17757	2.85274	2.97358	4.01858	4.8541	3.38054	2.29442	2.96179	2.71572	4.25236	3.39649	4.55713	3.01334	3.30791	2.94612	Tumor	CESC
TCGA-EA-A43B-01A	4.0584	2.56797	2.21127	3.61958	1.89541	4.03597	3.36726	3.13736	1.61545	2.52738	2.29821	3.07482	4.26188	3.2807	3.23278	2.75011	2.84653	Tumor	CESC
TCGA-MA-AA42-01A	4.09157	2.53145	2.6934	3.43388	2.08033	4.07308	4.15366	3.42513	2.3681	3.18806	2.18261	3.30498	3.5115	4.16015	3.1298	3.07991	3.19802	Tumor	CESC
TCGA-VS-A9UJ-01A	4.87649	2.73831	3.03401	3.1203	2.51213	3.73762	4.38538	4.09808	2.80315	2.8332	3.18417	3.95347	3.587	3.83362	3.13455	3.02072	3.24248	Tumor	CESC
TCGA-VS-A9V1-01A	4.42525	2.41878	2.52177	3.44074	2.86554	3.75273	4.40335	3.562	2.45529	2.73973	2.78444	4.25844	4.07135	4.03052	2.72158	3.6439	3.87918	Tumor	CESC
TCGA-JW-AAVH-01A	4.74674	2.77355	2.87192	3.2605	2.75833	4.15156	4.36445	3.74317	3.02361	2.31264	3.11216	4.04033	3.63886	4.74221	3.76398	3.67367	3.12752	Tumor	CESC
TCGA-VS-A8EJ-01A	4.97598	2.9139	2.24595	4.2295	2.52834	4.25498	4.07893	3.7455	1.85121	2.8876	2.66398	3.85694	3.60929	3.36956	3.22606	2.83811	3.71866	Tumor	CESC
TCGA-Q1-A73O-01A	4.00901	2.75826	3.14519	3.00253	2.9042	4.15848	4.57225	3.97899	2.55797	2.73856	3.11861	4.128	3.76914	3.6009	3.1324	3.44663	2.81232	Tumor	CESC
TCGA-FU-A2QG-01A	4.41758	2.71217	3.4673	2.21846	2.55595	4.54883	4.47387	3.92597	2.89922	3.49438	3.5494	4.27953	3.76994	4.57369	3.53921	3.29676	3.37017	Tumor	CESC
TCGA-DS-A1O9-01A	3.46238	2.4408	3.19041	2.71951	2.81296	3.93723	4.33578	3.60999	1.92976	2.7331	2.9387	3.6667	3.06661	4.50158	3.13639	3.71888	3.30967	Tumor	CESC
TCGA-VS-A8QA-01A	3.90787	2.61975	2.959	3.39461	2.99266	4.32161	6.13382	4.12646	2.50167	2.30161	3.39354	4.15606	3.68309	3.64481	3.80811	4.1084	3.40767	Tumor	CESC
TCGA-C5-A1MH-01A	4.02226	2.3721	3.27537	2.9157	2.88962	3.84588	4.70582	3.99911	2.63594	2.67707	3.33091	4.08736	3.69499	4.55227	3.23459	3.00782	3.17037	Tumor	CESC
TCGA-XS-A8TJ-01A	4.50995	2.62852	2.69336	3.4164	2.9312	3.95935	4.95559	3.88418	2.98847	2.28496	3.51381	4.14965	3.64018	4.69326	3.43733	4.19568	3.05698	Tumor	CESC
TCGA-C5-A1ME-01A	4.1381	2.51624	2.26902	3.60364	1.75602	4.24964	3.63327	3.25507	1.62508	2.24485	2.00342	3.1635	4.43664	3.41387	2.98359	3.31685	3.66421	Tumor	CESC
TCGA-C5-A2LZ-01A	5.00685	2.69255	3.14025	3.64294	2.75225	3.57167	4.61958	3.97307	2.7061	3.13947	3.39869	4.12507	3.55513	3.8555	3.03417	3.697	3.58122	Tumor	CESC
TCGA-HM-A3JJ-11A	3.55497	2.28776	2.61064	2.3761	2.23577	3.00521	3.94475	3.2025	2.76431	2.10728	2.99648	3.48702	3.09483	2.55754	2.42746	3.34599	2.59103	Normal	CESC
TCGA-GH-A9DA-01A	4.56994	2.48136	2.17978	3.20969	2.55866	3.68166	4.3214	3.69632	1.59694	2.48167	2.27254	3.79833	3.85623	3.76599	2.7838	2.47141	2.97838	Tumor	CESC
TCGA-VS-A8QH-01A	4.87684	2.56785	2.80048	3.09733	1.9887	3.97068	4.08228	3.42609	2.72555	2.93927	2.98984	3.68025	3.37036	3.74112	2.86152	2.84435	3.26168	Tumor	CESC
TCGA-VS-A9U6-01A	4.68976	2.61775	2.79743	2.94491	2.5829	4.39536	4.75666	4.29263	2.59694	3.0766	3.85571	4.38053	3.91793	3.50711	3.07507	4.10498	3.12165	Tumor	CESC
TCGA-C5-A8YQ-01A	4.96784	2.46674	2.50405	4.19818	2.27983	4.643	4.09097	3.70504	2.04621	2.27774	2.57123	3.87271	3.43938	3.91224	2.8008	3.86766	3.43721	Tumor	CESC
TCGA-DS-A1OA-01A	3.84517	2.44496	3.093	3.2725	2.84198	4.93343	4.53644	3.61941	2.65177	2.52945	2.78263	3.91855	3.63142	3.58852	3.35059	3.32641	3.60177	Tumor	CESC
TCGA-HG-A2PA-01A	3.96682	2.50108	3.07518	3.00777	2.90292	3.84294	4.50482	3.50953	2.72588	2.85431	2.99483	4.0182	3.47146	3.50486	3.51104	4.00857	2.50745	Tumor	CESC
TCGA-EA-A3QD-01A	4.7915	2.79513	3.1085	3.40279	2.47641	4.26847	4.70537	3.92441	3.69108	2.7236	3.03415	3.87977	3.73814	4.69079	3.34773	3.56372	2.97341	Tumor	CESC
TCGA-C5-A7UC-01A	4.32677	2.50082	2.76322	3.64286	2.96748	3.85156	4.82222	3.45577	2.98643	2.37272	1.94822	3.98841	3.23797	3.88568	3.26509	2.77354	2.84605	Tumor	CESC
TCGA-MA-AA43-01A	4.21165	2.16306	2.30976	2.90627	3.08751	3.33817	3.99385	3.38102	2.28184	2.73511	2.55812	4.32543	3.42957	3.79078	3.31692	3.44796	4.01728	Tumor	CESC
TCGA-Q1-A73R-01A	4.91905	2.65565	2.91589	3.47424	2.27737	4.07243	5.46904	3.98392	2.53514	2.48962	2.9757	3.193	3.88209	3.74609	3.71566	4.39152	3.15086	Tumor	CESC
TCGA-PN-A8MA-01A	4.71183	2.76183	2.85238	3.24043	2.90172	3.92579	6.00021	4.18889	2.52155	2.71108	4.43534	4.54967	3.76286	3.42117	4.25701	3.54061	4.08667	Tumor	CESC
TCGA-C5-A2LV-01A	4.51635	2.5429	2.95878	3.05668	2.82486	3.93168	4.48665	3.52285	1.83034	3.21975	1.87396	3.88495	3.39954	4.48374	2.70245	2.94255	2.9254	Tumor	CESC
TCGA-VS-A9UQ-01A	5.11178	2.69372	3.11571	2.87407	2.82806	3.79027	4.63535	3.95625	2.1579	2.58684	2.93706	4.35863	4.0343	3.85445	3.21189	3.86913	3.0517	Tumor	CESC
TCGA-MY-A5BF-01A	4.17528	1.98833	3.37053	2.20135	2.89705	4.15356	4.01047	3.3157	1.12076	2.50576	2.44064	4.12062	3.25609	3.42706	3.10106	3.1699	2.89321	Tumor	CESC
TCGA-JX-A3Q8-01A	4.71008	2.6511	3.48107	2.95788	2.74398	4.29348	4.5626	3.67336	2.01666	2.55731	2.64005	3.88858	3.38569	4.19206	3.37775	3.22976	3.20659	Tumor	CESC
TCGA-VS-A9UM-01A	4.9755	2.63149	2.93099	3.31353	2.92208	3.92463	4.60028	3.64388	2.8516	3.04626	3.22028	4.08975	3.48691	4.52972	2.80569	3.93194	3.11013	Tumor	CESC
TCGA-VS-A8EH-01A	4.52457	2.84583	2.64603	3.03733	2.94648	3.95242	4.13724	3.85286	3.79535	3.48339	2.91939	4.13432	3.315	4.28959	3.18254	3.40227	3.3567	Tumor	CESC
TCGA-LP-A4AW-01A	4.57462	2.79312	3.15082	3.3665	2.855	3.92222	4.34633	3.79571	2.72211	2.68641	3.28727	3.97225	3.57838	4.78809	3.24717	3.91456	2.90383	Tumor	CESC
TCGA-C5-A1MJ-01A	4.87816	2.89968	3.2914	3.51456	2.72168	4.11726	4.74475	4.58145	3.06107	2.64968	3.46214	4.02441	3.48297	4.50672	3.46327	3.85678	3.63544	Tumor	CESC
TCGA-UC-A7PD-01A	4.33164	2.52815	2.646	3.33896	2.49427	3.38906	4.54624	3.63653	2.15971	2.78328	2.68938	3.53006	4.02344	4.05893	3.06228	3.18294	2.83493	Tumor	CESC
TCGA-EK-A2RK-01A	4.85208	2.90237	2.56804	3.29007	2.55743	4.0972	4.70975	3.54066	2.2167	2.14746	3.06561	4.04138	3.73962	3.72806	3.19474	2.86242	3.17496	Tumor	CESC
TCGA-Q1-A5R1-01A	4.45381	2.09277	2.7394	3.18331	2.65923	5.13198	4.50695	3.79299	2.53344	2.75296	2.96909	4.2022	3.58894	3.55026	3.34355	3.3791	3.34772	Tumor	CESC
TCGA-VS-A9U5-01A	5.11902	2.59869	2.37578	3.8165	3.0649	4.10474	3.99479	4.29792	4.16699	3.16017	3.42446	4.10089	3.92846	4.72825	3.27123	3.78698	2.85642	Tumor	CESC
TCGA-EA-A3QE-01A	4.32895	2.51697	3.18472	2.90878	3.38616	3.92416	4.03502	3.49932	3.23096	2.87475	3.17725	4.21028	3.68814	3.74279	3.49371	3.7921	2.29892	Tumor	CESC
TCGA-EK-A3GM-01A	3.82087	2.45509	3.23728	2.71898	2.18876	3.13039	3.93054	3.83424	2.61799	2.26585	3.49106	4.13686	4.23922	3.70091	2.58543	3.68591	3.97917	Tumor	CESC
TCGA-EA-A3HT-01A	3.32061	2.39501	3.32775	2.80396	2.72749	3.5595	4.32734	3.84631	2.56078	2.55459	3.14628	4.05017	3.03989	5.01713	2.82434	3.32159	2.74303	Tumor	CESC
TCGA-IR-A3L7-01A	5.01799	2.99124	3.16875	3.61226	3.45626	3.74566	4.91869	4.09684	3.30297	2.59446	3.49938	4.61707	4.17434	4.82228	3.74284	3.8331	3.56474	Tumor	CESC
TCGA-C5-A2LX-01A	4.28368	2.73673	2.33254	3.26721	1.56507	4.2934	2.96964	3.80606	1.89634	2.88302	2.60743	3.0542	4.37177	2.90629	3.11002	3.18945	3.13481	Tumor	CESC
TCGA-MU-A51Y-01A	4.13024	2.76512	2.9694	2.9668	2.81797	3.82429	4.22961	3.63662	2.17392	3.22075	2.67787	3.91594	4.00637	4.27124	3.26459	3.65966	3.07639	Tumor	CESC
TCGA-JX-A5QV-01A	3.7782	2.30391	2.70884	3.46018	2.57215	4.46775	3.99959	3.88088	2.50911	2.66753	2.8778	3.66962	4.17958	3.86222	3.39733	2.89002	2.34911	Tumor	CESC
TCGA-FU-A3HY-01A	3.66063	2.6865	3.19524	3.24716	3.58183	4.75737	4.90195	3.72326	2.63077	3.10188	3.07064	4.44209	3.28195	3.94144	3.46812	3.28431	3.39353	Tumor	CESC
TCGA-MU-A8JM-01A	3.39167	2.27017	3.13122	2.91578	2.79285	3.53287	4.50778	3.39562	2.02678	2.41344	2.29047	4.10548	3.64555	3.36386	2.66083	3.10167	2.4764	Tumor	CESC
TCGA-RA-A741-01A	4.99389	2.72817	2.55689	3.38812	2.50012	4.19289	4.50811	3.42687	1.84768	2.97883	2.60184	3.80484	4.12351	3.75557	2.95586	3.42429	3.79505	Tumor	CESC
TCGA-C5-A1BF-01B	4.05135	2.48209	2.988	2.41144	2.81687	4.1249	4.33065	3.61747	1.8491	2.71028	2.87861	3.90997	3.85377	3.37753	2.67823	3.81301	3.08153	Tumor	CESC
TCGA-C5-A3HL-01A	3.46084	2.57874	3.00725	2.99977	2.85618	3.71758	4.71314	3.80687	2.28505	2.41144	2.86778	3.98481	3.36018	3.61308	3.04998	3.55001	2.89418	Tumor	CESC
TCGA-EK-A2RN-01A	3.98288	1.60397	1.79541	2.16213	1.82933	2.53835	3.35246	2.49443	2.78627	1.56608	2.95757	3.03192	3.45298	3.2103	2.61416	1.87176	1.80333	Tumor	CESC
TCGA-C5-A901-01A	3.47562	2.26204	3.09079	2.79423	2.61893	3.65804	4.29238	3.43247	1.83317	2.84082	2.82222	3.93028	3.54613	3.3699	2.70675	3.1417	2.99115	Tumor	CESC
TCGA-VS-A9UI-01A	4.45626	2.3676	2.95702	2.80212	2.85931	3.99948	4.325	3.47048	2.02245	3.19504	3.17208	4.18572	4.16335	4.50028	2.74567	3.26309	3.77244	Tumor	CESC
TCGA-VS-A9UY-01A	4.7981	2.6847	3.04834	2.5683	3.25814	4.10858	3.94873	3.74658	2.77638	3.95841	3.05045	4.10773	3.43865	4.16917	3.24372	0.985433	3.04934	Tumor	CESC
TCGA-C5-A1MF-01A	4.01192	2.20722	1.10444	3.76526	1.18079	3.90259	3.09864	3.07608	0.693072	2.07785	1.57388	2.2929	4.51393	2.34485	2.54047	2.54777	2.5699	Tumor	CESC
TCGA-VS-A9UL-01A	4.43604	3.21372	2.99671	3.61302	3.04393	4.43382	5.37714	4.18461	3.11682	2.79357	3.87424	4.53857	3.93097	4.07489	3.00309	4.7307	3.46182	Tumor	CESC
TCGA-ZJ-AAXN-01A	4.10599	2.49153	2.86569	2.64478	2.47673	4.17575	4.20762	3.80553	3.33198	2.77897	3.2258	3.69054	3.81042	3.4817	3.17045	3.87584	3.31455	Tumor	CESC
TCGA-ZJ-A8QQ-01A	4.72773	3.01694	2.67167	2.62276	2.75703	4.28867	4.19097	3.61529	2.80599	3.24308	2.79673	3.62704	4.18632	4.05368	3.38696	4.08287	3.38898	Tumor	CESC
TCGA-C5-A8XI-01A	4.59286	2.75555	3.0711	3.18308	2.60739	3.92976	4.36073	3.83988	2.63895	2.49844	2.80667	3.74931	3.85466	4.15315	3.69316	3.81037	2.88926	Tumor	CESC
TCGA-C5-A8XJ-01A	4.09266	2.72375	2.94192	3.34749	3.03123	4.24114	5.08897	3.9965	2.57146	3.13827	3.51467	4.46334	4.46962	3.77858	3.15078	4.46128	4.23959	Tumor	CESC
TCGA-EA-A5ZF-01A	4.06059	2.79354	3.013	3.12512	2.97372	4.49289	5.60194	4.1243	2.52317	2.50278	3.27189	4.60446	4.25849	4.91202	3.53297	3.46613	4.33364	Tumor	CESC
TCGA-IR-A3LC-01A	3.87621	2.79198	3.59182	4.09747	3.11978	5.32597	4.64948	4.01066	1.73081	2.69929	2.87229	4.14104	3.5229	4.18714	3.34026	0.858052	3.23569	Tumor	CESC
[truncated: 9,058 more rows]
