# Supplementary material for: A pan-cancer analysis of the core pre-mRNA 3′ end processing factors, and their association with prognosis, tumor microenvironment, and potential targets
Source: Research Square preprint supplement (doi:10.21203/rs.3.rs-3421663/v1), 2023-10-12
Supplement: Supplementary file 6 [file a953765f08995b400bdf04c3.xlsx]

## Sheet: gene
CPSF1
WDR33
FIP1L1
CPSF4
CPSF2
CPSF3
NUDT21
CPSF6
PCF11
CLP1
RBBP6
PAPOLA
SYMPK
CSTF2
CSTF3
CSTF2T
CSTF1
