# Supplementary material for: A pan-cancer analysis of the core pre-mRNA 3′ end processing factors, and their association with prognosis, tumor microenvironment, and potential targets
Source: Research Square preprint supplement (doi:10.21203/rs.3.rs-3421663/v1), 2023-10-12
Supplement: Supplementary file 7 [file aa7a3c22d42fb882274d9395.xlsx]

## Sheet: CPSF2-MSI
CancerType	cor	pValue	sig
ACC	-0.107207	0.347012
BLCA	-0.0339884	0.493581
BRCA	-0.119648	0.000117653	***
CESC	-0.00998055	0.862865
CHOL	-0.0828829	0.629667
COAD	0.158853	0.000988219	***
DLBC	-0.580214	1.54301e-05	***
ESCA	0.0051595	0.948372
GBM	-0.124729	0.12703
HNSC	-0.130066	0.00371117	**
KICH	0.185093	0.139918
KIRC	0.0749339	0.171214
KIRP	-0.0658651	0.267755
LAML	-0.0676802	0.583426
LGG	-0.0720146	0.104967
LIHC	0.0243774	0.640675
LUAD	-0.0417646	0.34609
LUSC	-0.00673052	0.881503
MESO	0.0718165	0.521411
OV	0.124531	0.0401355	*
PAAD	0.0316743	0.677327
PCPG	0.00280453	0.970363
PRAD	-0.16608	0.000206019	***
READ	0.151526	0.0623934
SARC	0.0914638	0.146875
SKCM	-0.111405	0.0159034	*
STAD	0.165665	0.00130295	**
TGCT	-0.148397	0.069936
THCA	-0.253411	1.24028e-08	***
THYM	0.000211833	0.998184
UCEC	0.212636	6.43683e-07	***
UCS	0.0915957	0.50197
UVM	0.0969612	0.39221

## Sheet: CPSF3-MSI
CancerType	cor	pValue	sig
ACC	-0.125525	0.270343
BLCA	0.0773733	0.118663
BRCA	-0.025166	0.419548
CESC	-0.0409674	0.478149
CHOL	0.23758	0.162497
COAD	-0.0870573	0.0723212
DLBC	0.328186	0.0227695	*
ESCA	0.0188947	0.812541
GBM	0.0311582	0.704102
HNSC	0.0817221	0.0689895
KICH	1	0.333333

## Sheet: CSTF2-MSI
CancerType	cor	pValue	sig
ACC	0.381918	0.000514486	***
BLCA	0.0620153	0.211297
BRCA	-0.118211	0.000142154	***
CESC	0.0363699	0.528938
CHOL	-0.143115	0.40356
COAD	0.173654	0.000311791	***
DLBC	-0.192211	0.190597
ESCA	0.0886944	0.264718
GBM	0.183164	0.0243774	*
HNSC	-0.0493289	0.272859
KICH	0.0888855	0.481365
KIRC	0.21275	8.69388e-05	***
KIRP	-0.0425171	0.474646
LAML	0.030729	0.803548
LGG	0.0232283	0.601448
LIHC	0.115513	0.0264982	*
LUAD	0.036455	0.410888
LUSC	0.146929	0.00106852	**
MESO	0.205926	0.0634458
OV	-0.0337163	0.579812
PAAD	-0.0218678	0.773924
PCPG	-0.0153504	0.838846
PRAD	0.0065876	0.883767
READ	-0.0279049	0.732907
SARC	0.193759	0.00196115	**
SKCM	-0.0506933	0.273764
STAD	0.130212	0.0117192	*
TGCT	-0.0746011	0.364251
THCA	-0.00083312	0.985309
THYM	-0.0368078	0.692317
UCEC	0.178002	3.29103e-05	***
UCS	0.0520865	0.703019
UVM	0.10458	0.355899

## Sheet: SYMPK-MSI
CancerType	cor	pValue	sig
ACC	-0.0373422	0.743873
BLCA	0.0457813	0.356329
BRCA	0.12074	0.000101751	***
CESC	0.0971792	0.0918376
CHOL	0	1
COAD	-0.0955475	0.048482	*
DLBC	0.307722	0.033363	*
ESCA	0.166723	0.0351064	*
GBM	0.0737806	0.367947
HNSC	0.153723	0.000591726	***
KICH	0.231316	0.0637422
KIRC	0.104597	0.0558075
KIRP	0.0896111	0.131248
LAML	-0.083789	0.49693
LGG	0.0741335	0.0951042
LIHC	0.191074	0.000222471	***
LUAD	0.266631	9.14193e-10	***
LUSC	0.268499	1.37743e-09	***
MESO	0.0950551	0.395619
OV	-0.00326667	0.957232
PAAD	0.133334	0.0785657
PCPG	0.022282	0.767825
PRAD	0.156385	0.000479305	***
READ	-0.269584	0.000783338	***
SARC	0.148294	0.0182677	*
SKCM	-0.00587279	0.899171
STAD	-0.0530428	0.306267
TGCT	-0.237726	0.00339733	**
THCA	0.0716755	0.112691
THYM	-0.087465	0.346292
UCEC	0.0183734	0.670681
UCS	-0.215284	0.111059
UVM	-0.164278	0.145354
