# Supplementary material for: A pan-cancer analysis of the core pre-mRNA 3′ end processing factors, and their association with prognosis, tumor microenvironment, and potential targets
Source: Research Square preprint supplement (doi:10.21203/rs.3.rs-3421663/v1), 2023-10-12
Supplement: Supplementary file 8 [file c5b5f3af6478c9c6d4a53883.xlsx]

## Sheet: pvalue
CancerType	CPSF1	WDR33	FIP1L1	CPSF4	CPSF2	CPSF3	NUDT21	CPSF6	PCF11	CLP1	RBBP6	PAPOLA	SYMPK	CSTF2	CSTF3	CSTF2T	CSTF1
BLCA	1.64415e-08	0.00867417	0.00310684	1.50576e-08	0.00213874	5.64091e-09	0.261227	5.73845e-08	0.0310559	0.00115552	0.0777986	0.0543416	3.66931e-08	3.69486e-05	3.19727e-07	0.0122217	9.68377e-06
BRCA	2.7925e-19	0.612079	7.16361e-10	0.593866	3.61755e-17	9.25504e-31	1.14934e-07	3.61551e-10	9.75401e-11	0.000239604	0.352637	0.0009198	2.98484e-17	2.29165e-42	9.1382e-37	0.870634	1.88414e-25
CHOL	4.51384e-09	2.25692e-09	4.51384e-09	2.25692e-09	9.02768e-09	4.51384e-09	2.25692e-09	2.25692e-09	4.28815e-08	2.8128e-05	4.51384e-09	4.06923e-06	2.25692e-09	2.25692e-09	4.51384e-09	2.25692e-09	2.25692e-09
COAD	1.92151e-14	7.14693e-08	1.58709e-07	3.05717e-21	3.574e-08	3.48249e-22	2.05137e-13	1.36331e-18	0.107359	3.04672e-06	5.83528e-06	0.00232402	1.66084e-12	4.82994e-11	1.67683e-17	0.908871	2.42666e-23
ESCA	0.00223091	0.00268524	3.66486e-05	3.37869e-05	0.000434827	2.37415e-06	0.000368688	6.01681e-06	0.839773	0.000233474	0.0070006	0.000511913	0.000161262	0.000211706	3.41732e-06	0.385486	0.000304658
GBM	0.634286	0.895471	0.0216208	0.000149421	0.0161417	0.000149421	0.098202	0.888308	0.267011	0.00014406	0.240635	0.00154115	0.226415	0.000265264	0.12237	0.00154115	0.000247168
HNSC	2.69267e-18	5.23957e-12	3.67158e-09	4.74904e-12	3.74988e-10	4.50933e-20	6.4745e-07	6.70106e-11	2.75078e-05	1.52345e-12	0.274934	1.65935e-08	1.87506e-15	0.464778	4.42967e-14	0.029625	2.81567e-12
KICH	0.496816	5.5769e-09	0.000657332	0.220589	0.0433799	2.54572e-08	0.000949464	0.00434337	5.2845e-06	0.667274	0.281461	0.0011556	0.0433799	0.00211235	5.82519e-07	3.08334e-11	0.0205652
KIRC	3.00907e-14	1.83586e-09	1.34219e-07	1.66039e-14	2.3834e-18	0.718006	2.86723e-26	0.0236785	0.0323047	0.00400332	6.21161e-07	0.000160593	5.08618e-10	1.91564e-13	0.740599	2.69456e-15	4.12185e-06
KIRP	4.2883e-07	0.322832	5.84953e-06	1.53933e-05	0.340832	2.21773e-06	1.17272e-10	0.83071	0.0020396	0.975178	0.0954817	0.0137354	1.0643e-08	8.58256e-05	4.70032e-05	8.26767e-10	0.252112
LIHC	5.95991e-26	1.00233e-19	3.69603e-15	1.49056e-27	2.25831e-15	5.70163e-29	2.70402e-06	4.07415e-23	2.48418e-08	3.92014e-15	1.89615e-05	5.51559e-12	7.46018e-24	7.18568e-24	1.50254e-21	2.54808e-07	1.05217e-18
LUAD	1.62876e-19	1.46164e-12	1.16334e-16	3.0294e-23	4.03566e-12	1.72974e-32	0.00514187	3.3553e-26	0.000966786	7.68011e-07	0.0843911	4.20125e-12	9.35011e-08	1.46644e-32	3.40169e-28	0.94269	1.31277e-19
LUSC	7.64752e-16	9.39122e-10	6.86376e-22	1.0583e-28	4.34749e-16	2.69294e-29	1.31811e-12	2.29326e-26	2.31759e-06	4.16286e-14	0.0118454	1.74405e-18	6.85725e-10	1.4958e-29	4.11271e-27	0.0252878	1.1868e-21
PRAD	8.24773e-12	0.100291	0.928889	8.95028e-06	0.120028	0.000662846	1.82425e-06	4.8004e-10	0.00517682	0.0056339	0.120246	0.124452	8.79359e-11	0.0884085	7.94274e-09	0.0739138	0.000213153
READ	1.39591e-06	0.00323048	0.0305094	3.77966e-07	0.196023	5.63414e-06	0.0417162	1.57952e-05	0.209536	0.00285408	0.118803	0.876298	5.11207e-05	1.1152e-05	7.06163e-05	0.961993	2.61011e-07
STAD	7.28835e-10	3.33573e-11	1.51122e-08	4.30154e-10	1.27062e-12	1.14338e-16	8.7905e-10	5.64364e-18	0.124009	2.7486e-05	2.86534e-06	1.75609e-14	4.43267e-10	2.05057e-09	9.25992e-17	0.0981245	3.7032e-17
THCA	1.88631e-09	5.84945e-05	9.34919e-06	0.394932	0.075988	5.57659e-18	8.70288e-07	0.177916	2.65063e-24	0.000114936	7.77423e-15	1.05027e-17	3.08076e-05	0.466963	0.790581	3.34749e-09	3.57065e-05
UCEC	2.35749e-10	0.863174	0.254674	2.04262e-07	0.00146135	1.95486e-19	1.36272e-05	0.00635459	1.12859e-13	0.00221252	1.16489e-07	0.0877646	2.26016e-09	2.04988e-15	3.6384e-05	0.00145094	0.000161127
